# Supplementary material
Source: PubMed Central journal article supplement (PMC2683086)
Supplement: 0901781106_ST1_PDF.pdf [file 0901781106_ST1_PDF.pdf]

Table S1.

| Gene Number | Annotation                                                                                                                      | Gene | Entry Vector Constructed | Entry Vector Sequence Correct | Localized and Sequence-verified C-terminal Fusion | Localization w/ C-terminal Tag | Localized and Sequence-verified N-terminal Fusion | Localization w/ N-terminal Tag | Protein Localized as Both N- or C-terminal Fusion |
|-------------|---------------------------------------------------------------------------------------------------------------------------------|------|--------------------------|-------------------------------|---------------------------------------------------|--------------------------------|---------------------------------------------------|--------------------------------|---------------------------------------------------|
| CC0001      | ATP/GTP-binding protein                                                                                                         |      | Y                        | Y                             | N                                                 |                                | N                                                 |                                | N                                                 |
| CC0002      | Septum formation protein Maf                                                                                                    |      | Y                        | Y                             | N                                                 |                                | N                                                 |                                | N                                                 |
| CC0003      | Shikimate 5-dehydrogenase                                                                                                       |      | Y                        | Y                             | N                                                 |                                | N                                                 |                                | N                                                 |
| CC0004      | Dephospho-CoA kinase                                                                                                            |      | Y                        | Y                             | N                                                 |                                | N                                                 |                                | N                                                 |
| CC0005      | DNA polymerase III, epsilon chain                                                                                               | dnaQ | Y                        | Y                             | N                                                 |                                | N                                                 |                                | N                                                 |
| CC0006      | Enoyl-CoA hydratase                                                                                                             |      | Y                        | Y                             | N                                                 |                                | N                                                 |                                | N                                                 |
| CC0007      | SSU ribosomal protein S20P                                                                                                      |      | Y                        | Y                             | N                                                 |                                | N                                                 |                                | N                                                 |
|             | Chromosomal replication initiator protein                                                                                       |      |                          |                               |                                                   |                                |                                                   |                                |                                                   |
| CC0008      | dnaA                                                                                                                            | dnaA | Y                        | Y                             | N                                                 |                                | N                                                 |                                | N                                                 |
| CC0009      | Alkylated DNA repair protein alkB                                                                                               | alkB | N                        | N                             | N                                                 |                                | N                                                 |                                | N                                                 |
| CC0010      | Chaperone protein dnaK                                                                                                          | dnaK | Y                        | Y                             | Y                                                 | Central - Focus                | N                                                 |                                | N                                                 |
| CC0011      | Chaperone protein dnaJ                                                                                                          | dnaJ | N                        | N                             | N                                                 |                                | N                                                 |                                | N                                                 |
| CC0012      | DNA mismatch repair protein mutS                                                                                                | mutS | Y                        | Y                             | Y                                                 | Middle OR Pole                 | Y                                                 | Middle OR Pole                 | Y                                                 |
| CC0013      | [protein-P1I] uridylyltransferase                                                                                               |      | N                        | N                             | N                                                 |                                | N                                                 |                                | N                                                 |
| CC0014      | Molybdenum cofactor biosynthesis protein C                                                                                      | moaC | Y                        | Y                             | N                                                 |                                | N                                                 |                                | N                                                 |
| CC0015      | Molybdenum cofactor biosynthesis protein B                                                                                      | moaB | Y                        | Y                             | N                                                 |                                | N                                                 |                                | N                                                 |
| CC0016      | Molybdopterin converting factor, large subunit                                                                                  | moaE | Y                        | Y                             | N                                                 |                                | N                                                 |                                | N                                                 |
|             | Molybdopterin converting factor, small subunit                                                                                  |      |                          |                               |                                                   |                                |                                                   |                                |                                                   |
| CC0017      | subunit                                                                                                                         | moaD | Y                        | Y                             | N                                                 |                                | N                                                 |                                | N                                                 |
| CC0018      | Molybdenum cofactor biosynthesis protein A                                                                                      | moaA | Y                        | Y                             | N                                                 |                                | N                                                 |                                | N                                                 |
|             | Molybdopterin-guanine dinucleotide biosynthesis protein A                                                                       |      |                          |                               |                                                   |                                |                                                   |                                |                                                   |
| CC0019      | biosynthesis protein A                                                                                                          |      | Y                        | Y                             | N                                                 |                                | N                                                 |                                | N                                                 |
| CC0020      | Hypothetical protein                                                                                                            |      | Y                        | Y                             | N                                                 |                                | N                                                 |                                | N                                                 |
|             | Putative aerobic-type carbon monoxide dehydrogenase, large subunit coxL                                                         |      |                          |                               |                                                   |                                |                                                   |                                |                                                   |
| CC0021      | Putative aerobic-type carbon monoxide dehydrogenase, small subunit coxS                                                         |      | Y                        | Y                             | N                                                 |                                | N                                                 |                                | N                                                 |
| CC0022      | dehydrogenase, small subunit coxS                                                                                               |      | Y                        | Y                             | N                                                 |                                | N                                                 |                                | N                                                 |
| CC0023      | Putative periplasmic protein Uroporphyrin-III C-methyltransferase / Precorrin-2 dehydrogenase / Sirohydrochlorin ferrochelatase |      | Y                        | Y                             | N                                                 |                                | N                                                 |                                | N                                                 |
| CC0024      | ferrochelatase                                                                                                                  |      | Y                        | Y                             | N                                                 |                                | N                                                 |                                | N                                                 |
| CC0025      | Transporter                                                                                                                     |      | Y                        | Y                             | N                                                 |                                | N                                                 |                                | N                                                 |
| CC0026      | PAS-family sensor histidine kinase                                                                                              |      | N                        | N                             | N                                                 |                                | N                                                 |                                | N                                                 |
| CC0027      | 2OG-Fe(II) oxygenase                                                                                                            |      | Y                        | Y                             | N                                                 |                                | N                                                 |                                | N                                                 |
| CC0028      | TonB-dependent receptor                                                                                                         |      | Y                        | Y                             | N                                                 |                                | N                                                 |                                | N                                                 |
| CC0029      | Lysine exporter protein                                                                                                         |      | Y                        | Y                             | N                                                 |                                | N                                                 |                                | N                                                 |
| CC0030      | Ribonuclease                                                                                                                    |      | Y                        | Y                             | N                                                 |                                | N                                                 |                                | N                                                 |
| CC0031      | Toxin protein vapC                                                                                                              | vapC | Y                        | Y                             | N                                                 |                                | N                                                 |                                | N                                                 |
| CC0032      | Antitoxin protein vapB                                                                                                          | vapB | Y                        | Y                             | N                                                 |                                | N                                                 |                                | N                                                 |
| CC0033      |                                                                                                                                 |      | Y                        | Y                             | N                                                 |                                | N                                                 |                                | N                                                 |
|             | Polyribonucleotide nucleotidyltransferase / Polynucleotide adenyllyltransferase                                                 |      |                          |                               |                                                   |                                |                                                   |                                |                                                   |
| CC0034      | Polynucleotide adenyllyltransferase                                                                                             |      | Y                        | Y                             | N                                                 |                                | N                                                 |                                | N                                                 |
| CC0035      | SSU ribosomal protein S15P                                                                                                      |      | N                        | N                             | N                                                 |                                | N                                                 |                                | N                                                 |
| CC0036      | tRNA pseudouridine synthase B                                                                                                   |      | Y                        | Y                             | N                                                 |                                | N                                                 |                                | N                                                 |
| CC0037      | Ribosome-binding factor A                                                                                                       |      | Y                        | Y                             | N                                                 |                                | N                                                 |                                | N                                                 |
| CC0038      | Esterase Lipase Family Protein                                                                                                  |      | Y                        | Y                             | N                                                 |                                | N                                                 |                                | N                                                 |
| CC0039      | Hypothetical protein                                                                                                            |      | Y                        | Y                             | N                                                 |                                | N                                                 |                                | N                                                 |
| CC0040      | Hypothetical protein                                                                                                            |      | N                        | N                             | N                                                 |                                | N                                                 |                                | N                                                 |
| CC0041      | Hypothetical protein                                                                                                            |      | Y                        | Y                             | N                                                 |                                | N                                                 |                                | N                                                 |
|             | Bacterial Protein Translation Initiation Factor 2 (IF-2)                                                                        |      |                          |                               |                                                   |                                |                                                   |                                |                                                   |
| CC0042      | Hypothetical cytosolic protein / LSU ribosomal protein L7AE                                                                     |      | N                        | N                             | N                                                 |                                | N                                                 |                                | N                                                 |
| CC0043      | ribosomal protein L7AE                                                                                                          |      | N                        | N                             | N                                                 |                                | N                                                 |                                | N                                                 |

| Gene Number | Annotation                                                                                                                         | Gene | Entry Vector Constructed | Entry Vector Sequence Correct | Localized and Sequence-verified C-terminal Fusion | Localization w/ C-terminal Tag | Localized and Sequence-verified N-terminal Fusion | Localization w/ N-terminal Tag | Protein Localized as Both N- or C-terminal Fusion |
|-------------|------------------------------------------------------------------------------------------------------------------------------------|------|--------------------------|-------------------------------|---------------------------------------------------|--------------------------------|---------------------------------------------------|--------------------------------|---------------------------------------------------|
| CC0044      | N utilization substance protein A                                                                                                  |      | Y                        | N                             | N                                                 |                                | N                                                 |                                | N                                                 |
| CC0045      | Hypothetical cytosolic protein                                                                                                     |      | N                        | N                             | N                                                 |                                | N                                                 |                                | N                                                 |
| CC0046      |                                                                                                                                    |      | Y                        | Y                             | N                                                 |                                | N                                                 |                                | N                                                 |
| CC0047      | Inorganic pyrophosphatase                                                                                                          |      | Y                        | Y                             | Y                                                 | Middle OR Pole                 | N                                                 |                                | N                                                 |
| CC0048      | Conserved Hypothetical protein                                                                                                     |      | Y                        | N                             | N                                                 |                                | N                                                 |                                | N                                                 |
| CC0049      | tRNA G46) methyltransferase                                                                                                        |      | Y                        | Y                             | N                                                 |                                | N                                                 |                                | N                                                 |
| CC0050      | S-adenosylmethionine synthetase                                                                                                    | metK | Y                        | Y                             | Y                                                 | Varied Focus                   | Y                                                 | Varied Focus                   | Y                                                 |
| CC0051      | HTH transcriptional regulator                                                                                                      | hipB | Y                        | Y                             | N                                                 |                                | N                                                 |                                | N                                                 |
| CC0052      | Apolipoprotein N-acyltransferase                                                                                                   |      | N                        | N                             | N                                                 |                                | N                                                 |                                | N                                                 |
| CC0053      | Magnesium and cobalt efflux protein corC                                                                                           | corC | Y                        | Y                             | N                                                 |                                | N                                                 |                                | N                                                 |
| CC0054      | Predicted metal-dependent hydrolase                                                                                                |      | Y                        | Y                             | N                                                 |                                | N                                                 |                                | N                                                 |
| CC0055      | Phosphate starvation-inducible protein phoH                                                                                        | phoH | Y                        | Y                             | N                                                 |                                | N                                                 |                                | N                                                 |
| CC0056      | tRNA 2-methylthioadenosine synthase                                                                                                |      | N                        | N                             | N                                                 |                                | N                                                 |                                | N                                                 |
| CC0057      | Ferric uptake regulation protein                                                                                                   |      | Y                        | Y                             | N                                                 |                                | N                                                 |                                | N                                                 |
| CC0058      | Ribosomal-protein-S18-alanine acetyltransferase                                                                                    |      | Y                        | Y                             | N                                                 |                                | N                                                 |                                | N                                                 |
| CC0059      | Glycoprotease family protein                                                                                                       |      | Y                        | Y                             | N                                                 |                                | N                                                 |                                | N                                                 |
| CC0060      | Conserved hypothetical protein                                                                                                     |      | Y                        | Y                             | N                                                 |                                | N                                                 |                                | N                                                 |
| CC0061      | Oxygen-insensitive NADH nitroreductase                                                                                             |      | Y                        | Y                             | N                                                 |                                | N                                                 |                                | N                                                 |
| CC0062      | Mitochondrial type Fe-S cluster assembly protein NFU                                                                               |      | Y                        | Y                             | N                                                 |                                | N                                                 |                                | N                                                 |
| CC0063      | Cytochrome p450                                                                                                                    |      | Y                        | Y                             | N                                                 |                                | N                                                 |                                | N                                                 |
| CC0064      | Tryptophanyl-tRNA synthetase                                                                                                       | trpS | Y                        | Y                             | N                                                 |                                | N                                                 |                                | N                                                 |
| CC0065      | Virulence factor mviN                                                                                                              | mviN | Y                        | Y                             | N                                                 |                                | N                                                 |                                | N                                                 |
| CC0066      | Methyl-accepting chemotaxis protein                                                                                                |      | Y                        | Y                             | N                                                 |                                | Y                                                 | Polar                          | N                                                 |
| CC0067      | Hypothetical protein                                                                                                               |      | Y                        | Y                             | N                                                 |                                | N                                                 |                                | N                                                 |
| CC0068      | Rieske (2Fe-2S) domain protein                                                                                                     |      | Y                        | Y                             | N                                                 |                                | N                                                 |                                | N                                                 |
| CC0069      | Hypothetical cytosolic protein                                                                                                     |      | Y                        | N                             | N                                                 |                                | N                                                 |                                | N                                                 |
| CC0070      | Glycerol-3-phosphate dehydrogenase [NAD+]                                                                                          |      | N                        | N                             | N                                                 |                                | N                                                 |                                | N                                                 |
| CC0071      | O-sialoglycoprotein endopeptidase                                                                                                  |      | Y                        | Y                             | N                                                 |                                | N                                                 |                                | N                                                 |
| CC0072      | Porphobilinogen deaminase                                                                                                          |      | N                        | N                             | N                                                 |                                | N                                                 |                                | N                                                 |
| CC0073      | Uroporphyrinogen-III synthase                                                                                                      |      | Y                        | Y                             | N                                                 |                                | N                                                 |                                | N                                                 |
| CC0074      | Conserved hypothetical protein                                                                                                     |      | Y                        | Y                             | N                                                 |                                | Y                                                 | Middle OR Pole                 | N                                                 |
| CC0075      | HemY domain membrane protein                                                                                                       |      | Y                        | N                             | N                                                 |                                | N                                                 |                                | N                                                 |
| CC0076      | Enoyl-CoA hydratase / Delta-cis-delta-trans-enoyl-CoA isomerase / 3-hydroxyacyl-CoA dehydrogenase / 3-hydroxybutyryl-CoA epimerase |      | Y                        | Y                             | N                                                 |                                | N                                                 |                                | N                                                 |
| CC0077      | 3-ketoacyl-CoA thiolase                                                                                                            |      | Y                        | Y                             | N                                                 |                                | N                                                 |                                | N                                                 |
| CC0078      | Hypothetical protein                                                                                                               |      | Y                        | Y                             | N                                                 |                                | N                                                 |                                | N                                                 |
| CC0079      | Acyl-CoA dehydrogenase, long-chain specific                                                                                        |      | Y                        | Y                             | N                                                 |                                | N                                                 |                                | N                                                 |
| CC0080      | Acyl-CoA dehydrogenase                                                                                                             |      | Y                        | Y                             | N                                                 |                                | N                                                 |                                | N                                                 |
| CC0081      | Transcriptional regulator, MerR family                                                                                             |      | Y                        | Y                             | N                                                 |                                | N                                                 |                                | N                                                 |
| CC0082      | LexA-related transcriptional repressor                                                                                             |      | Y                        | Y                             | N                                                 |                                | N                                                 |                                | N                                                 |
| CC0083      | Hypothetical protein                                                                                                               |      | Y                        | N                             | N                                                 |                                | N                                                 |                                | N                                                 |
| CC0084      | Class 1 lysyl-tRNA synthetase                                                                                                      | lysS | Y                        | Y                             | N                                                 |                                | N                                                 |                                | N                                                 |
| CC0085      | Phosphoglucosyltransferase / Phosphomannomutase                                                                                    |      | N                        | N                             | N                                                 |                                | N                                                 |                                | N                                                 |
| CC0086      | Phosphoribosylaminoimidazolecarboxamide formyltransferase / IMP cyclohydrolase                                                     | purH | Y                        | Y                             | N                                                 |                                | N                                                 |                                | N                                                 |
| CC0087      | Dienelactone hydrolase-related protein                                                                                             |      | N                        | N                             | N                                                 |                                | N                                                 |                                | N                                                 |
| CC0088      | NAD-specific glutamate dehydrogenase                                                                                               |      | Y                        | N                             | N                                                 |                                | N                                                 |                                | N                                                 |

| Gene Number | Annotation                                                       | Gene | Entry Vector Constructed | Entry Vector Sequence Correct | Localized and Sequence-verified C-terminal Fusion | Localization w/ C-terminal Tag | Localized and Sequence-verified N-terminal Fusion | Localization w/ N-terminal Tag | Protein Localized as Both N- or C-terminal Fusion |
|-------------|------------------------------------------------------------------|------|--------------------------|-------------------------------|---------------------------------------------------|--------------------------------|---------------------------------------------------|--------------------------------|---------------------------------------------------|
| CC0089      | Conserved membrane spanning protein                              |      | Y                        | Y                             | N                                                 |                                | N                                                 |                                | N                                                 |
| CC0090      | HerA helicase-related ATPase                                     |      | Y                        | Y                             | N                                                 |                                | N                                                 |                                | N                                                 |
| CC0091      | MHYT/PAS-family GGDEF/EAL protein                                |      | Y                        | Y                             | N                                                 |                                | N                                                 |                                | N                                                 |
| CC0092      | UDP-glucose 4-epimerase                                          |      | Y                        | Y                             | N                                                 |                                | N                                                 |                                | N                                                 |
| CC0093      | Transporter, drug/metabolite exporter family                     |      | Y                        | Y                             | N                                                 |                                | N                                                 |                                | N                                                 |
| CC0094      | Short chain dehydrogenase                                        |      | Y                        | N                             | N                                                 |                                | N                                                 |                                | N                                                 |
| CC0095      | Probable UDP-N-acetyl-D-mannosaminuronic acid transferase        |      | N                        | N                             | N                                                 |                                | N                                                 |                                | N                                                 |
| CC0096      | Quinone oxidoreductase                                           |      | N                        | N                             | N                                                 |                                | N                                                 |                                | N                                                 |
| CC0097      | L-asparaginase                                                   |      | Y                        | Y                             | N                                                 |                                | N                                                 |                                | N                                                 |
| CC0098      | Conserved hypothetical protein                                   |      | Y                        | Y                             | N                                                 |                                | N                                                 |                                | N                                                 |
| CC0099      | Hypothetical protein                                             |      | N                        | N                             | N                                                 |                                | N                                                 |                                | N                                                 |
| CC0100      | Hypothetical cytosolic protein                                   |      | Y                        | Y                             | N                                                 |                                | Y                                                 | MidBand                        | N                                                 |
| CC0101      | Ribulose-phosphate 3-epimerase                                   |      | Y                        | N                             | N                                                 |                                | N                                                 |                                | N                                                 |
| CC0102      | 16S rRNA mC 967 methyltransferase RsmB                           | rsmB | Y                        | Y                             | N                                                 |                                | N                                                 |                                | N                                                 |
| CC0103      | Hypothetical cytosolic protein                                   |      | Y                        | N                             | N                                                 |                                | N                                                 |                                | N                                                 |
| CC0104      | Gamma-glutamyltranspeptidase                                     |      | Y                        | Y                             | N                                                 |                                | N                                                 |                                | N                                                 |
| CC0105      | Orotidine 5'-phosphate decarboxylase                             |      | N                        | N                             | N                                                 |                                | N                                                 |                                | N                                                 |
| CC0106      | MarC family integral membrane protein                            |      | Y                        | Y                             | N                                                 |                                | Y                                                 | Patchy/Spotty                  | N                                                 |
| CC0107      | 2-polyprenyl-6-methoxyphenol hydroxylase                         |      | N                        | N                             | N                                                 |                                | N                                                 |                                | N                                                 |
| CC0108      | conserved cytosolic protein                                      |      | Y                        | Y                             | N                                                 |                                | N                                                 |                                | N                                                 |
| CC0109      | ATP-dependent endopeptidase Lon                                  |      | Y                        | Y                             | N                                                 |                                | N                                                 |                                | N                                                 |
| CC0110      | Thioredoxin                                                      |      | Y                        | Y                             | N                                                 |                                | N                                                 |                                | N                                                 |
| CC0111      | DNA-binding protein                                              |      | Y                        | Y                             | N                                                 |                                | N                                                 |                                | N                                                 |
| CC0112      | Conserved hypothetical protein                                   |      | Y                        | Y                             | N                                                 |                                | N                                                 |                                | N                                                 |
| CC0113      | Glyoxalase family protein                                        |      | Y                        | Y                             | N                                                 |                                | N                                                 |                                | N                                                 |
| CC0114      | Hypothetical protein                                             |      | Y                        | Y                             | N                                                 |                                | N                                                 |                                | N                                                 |
| CC0115      | Transcriptional regulators, MarR/EmrR family                     |      | Y                        | Y                             | N                                                 |                                | N                                                 |                                | N                                                 |
| CC0116      | TolB protein                                                     |      | Y                        | N                             | N                                                 |                                | N                                                 |                                | N                                                 |
| CC0117      | Phosphoglucosamine mutase                                        |      | N                        | N                             | N                                                 |                                | N                                                 |                                | N                                                 |
| CC0118      | Glucosamine--fructose-6-phosphate aminotransferase [isomerizing] |      | Y                        | Y                             | N                                                 |                                | N                                                 |                                | N                                                 |
| CC0119      | Porphyrin biosynthesis protein                                   |      | Y                        | Y                             | N                                                 |                                | Y                                                 | Central - Focus                | N                                                 |
| CC0120      | Putative transcriptional regulator                               |      | Y                        | Y                             | N                                                 |                                | N                                                 |                                | N                                                 |
| CC0121      | Hypothetical acetyltransferase                                   |      | Y                        | N                             | N                                                 |                                | N                                                 |                                | N                                                 |
| CC0122      | Hypothetical protein                                             |      | Y                        | Y                             | N                                                 |                                | N                                                 |                                | N                                                 |
| CC0123      | Conserved hypothetical protein                                   |      | Y                        | Y                             | N                                                 |                                | N                                                 |                                | N                                                 |
| CC0124      | 3-hydroxyacyl CoA dehydrogenase                                  |      | Y                        | Y                             | N                                                 |                                | N                                                 |                                | N                                                 |
| CC0125      | Conserved hypothetical protein                                   |      | Y                        | N                             | N                                                 |                                | N                                                 |                                | N                                                 |
| CC0126      | Transporter, LysE family                                         |      | Y                        | N                             | N                                                 |                                | N                                                 |                                | N                                                 |
| CC0127      | Glutathione S-transferase                                        |      | Y                        | Y                             | N                                                 |                                | N                                                 |                                | N                                                 |
| CC0128      | Hypothetical protein                                             |      | Y                        | Y                             | N                                                 |                                | N                                                 |                                | N                                                 |
| CC0129      | Argininosuccinate synthase                                       |      | Y                        | Y                             | N                                                 |                                | N                                                 |                                | N                                                 |
| CC0130      | Hypothetical protein                                             |      | Y                        | Y                             | N                                                 |                                | N                                                 |                                | N                                                 |
| CC0131      | Kup system potassium uptake protein                              |      | Y                        | Y                             | Y                                                 | Patchy/Spotty                  | N                                                 |                                | N                                                 |
| CC0132      | Rrf2 family protein                                              |      | Y                        | Y                             | N                                                 |                                | N                                                 |                                | N                                                 |
| CC0133      | Ketoacyl reductase hetN                                          | hetN | Y                        | Y                             | N                                                 |                                | Y                                                 | Patchy/Spotty                  | N                                                 |
| CC0134      | Radical SAM family enzyme                                        |      | Y                        | Y                             | N                                                 |                                | N                                                 |                                | N                                                 |
| CC0135      | surface protein                                                  |      | Y                        | Y                             | N                                                 |                                | N                                                 |                                | N                                                 |
| CC0136      | Endopeptidase degP                                               | degP | Y                        | Y                             | N                                                 |                                | N                                                 |                                | N                                                 |
| CC0137      | AmpG protein                                                     |      | Y                        | Y                             | N                                                 |                                | N                                                 |                                | N                                                 |
| CC0138      | Hybrid two-component histidine kinase/receiver protein shkA      | shkA | Y                        | Y                             | N                                                 |                                | N                                                 |                                | N                                                 |

| Gene Number | Annotation                                                                                                                     | Gene | Entry Vector Constructed | Entry Vector Sequence Correct | Localized and Sequence-verified C-terminal Fusion | Localization w/ C-terminal Tag | Localized and Sequence-verified N-terminal Fusion | Localization w/ N-terminal Tag | Protein Localized as Both N- or C-terminal Fusion |
|-------------|--------------------------------------------------------------------------------------------------------------------------------|------|--------------------------|-------------------------------|---------------------------------------------------|--------------------------------|---------------------------------------------------|--------------------------------|---------------------------------------------------|
| CC0139      | Iron(III) dicitrate transport protein fecA ATPase related to magnesium chelatase                                               | fecA | Y                        | Y                             | N                                                 |                                | N                                                 |                                | N                                                 |
| CC0140      | subunit ChII                                                                                                                   | chII | N                        | N                             | N                                                 |                                | N                                                 |                                | N                                                 |
| CC0141      | Glutathione synthetase                                                                                                         |      | N                        | N                             | N                                                 |                                | N                                                 |                                | N                                                 |
| CC0142      | Tetratricopeptide repeat family protein                                                                                        |      | Y                        | N                             | N                                                 |                                | N                                                 |                                | N                                                 |
| CC0143      | Endonuclease                                                                                                                   |      | Y                        | Y                             | N                                                 |                                | N                                                 |                                | N                                                 |
| CC0144      | Tetrapyrrole (Corrin/Porphyrin) methylase family protein                                                                       |      | Y                        | Y                             | N                                                 |                                | N                                                 |                                | N                                                 |
| CC0145      | Oxygen-independent coproporphyrinogen-III oxidase                                                                              |      | Y                        | N                             | N                                                 |                                | N                                                 |                                | N                                                 |
| CC0146      | Xanthosine triphosphate pyrophosphatase                                                                                        |      | Y                        | Y                             | N                                                 |                                | N                                                 |                                | N                                                 |
| CC0147      | Glutathione S-transferase                                                                                                      |      | Y                        | Y                             | N                                                 |                                | N                                                 |                                | N                                                 |
| CC0148      | Hypothetical protein                                                                                                           |      | Y                        | Y                             | N                                                 |                                | N                                                 |                                | N                                                 |
| CC0149      | Conserved hypothetical protein                                                                                                 |      | Y                        | Y                             | N                                                 |                                | N                                                 |                                | N                                                 |
| CC0150      | Transcriptional regulator, Cro/C1 family                                                                                       |      | Y                        | N                             | N                                                 |                                | N                                                 |                                | N                                                 |
| CC0151      | PDZ domain family protein                                                                                                      |      | Y                        | Y                             | N                                                 |                                | N                                                 |                                | N                                                 |
| CC0152      | Ribonuclease PH                                                                                                                |      | Y                        | N                             | N                                                 |                                | N                                                 |                                | N                                                 |
| CC0153      | Heat-inducible transcription repressor hrcA                                                                                    | hrcA | Y                        | Y                             | N                                                 |                                | Y                                                 | Pole                           | N                                                 |
| CC0154      | GrpE protein                                                                                                                   | grpE | N                        | N                             | N                                                 |                                | N                                                 |                                | N                                                 |
| CC0155      | Hypothetical protein                                                                                                           |      | Y                        | Y                             | N                                                 |                                | N                                                 |                                | N                                                 |
| CC0156      | DNA polymerase III, beta chain                                                                                                 |      | Y                        | Y                             | Y                                                 | Central - Focus                | Y                                                 | Central - Focus                | Y                                                 |
| CC0157      | Transcriptional regulator, ArsR family                                                                                         |      | Y                        | Y                             | N                                                 |                                | N                                                 |                                | N                                                 |
| CC0158      | Glyoxalase family protein                                                                                                      |      | Y                        | Y                             | N                                                 |                                | N                                                 |                                | N                                                 |
| CC0159      | DNA replication and repair protein recF                                                                                        | recF | N                        | N                             | N                                                 |                                | N                                                 |                                | N                                                 |
| CC0160      | DNA gyrase subunit B                                                                                                           |      | N                        | N                             | N                                                 |                                | N                                                 |                                | N                                                 |
| CC0161      | Methyl-accepting chemotaxis protein                                                                                            |      | Y                        | Y                             | Y                                                 | Pole                           | Y                                                 | Pole                           | Y                                                 |
| CC0162      | Hypothetical protein                                                                                                           |      | Y                        | Y                             | N                                                 |                                | N                                                 |                                | N                                                 |
| CC0163      | Conserved hypothetical protein                                                                                                 |      | Y                        | Y                             | N                                                 |                                | N                                                 |                                | N                                                 |
| CC0164      | Chain length regulator (capsular polysaccharide biosynthesis) / Tyrosine-protein kinase (capsular polysaccharide biosynthesis) |      | Y                        | N                             | N                                                 |                                | N                                                 |                                | N                                                 |
| CC0165      | O-antigen polymerase                                                                                                           |      | Y                        | Y                             | N                                                 |                                | N                                                 |                                | N                                                 |
| CC0166      | Polyisoprenylphosphate hexose-1-phosphotransferase pssY                                                                        | pssY | Y                        | Y                             | N                                                 |                                | N                                                 |                                | N                                                 |
| CC0167      | Hypothetical protein                                                                                                           |      | Y                        | Y                             | N                                                 |                                | N                                                 |                                | N                                                 |
| CC0168      | Bis(5'-nucleosyl)-tetrakisphosphate (symmetrical)                                                                              |      | Y                        | Y                             | N                                                 |                                | N                                                 |                                | N                                                 |
| CC0169      | Putative capsule polysaccharide export protein precursor                                                                       |      | Y                        | Y                             | N                                                 |                                | N                                                 |                                | N                                                 |
| CC0170      | Hypothetical protein                                                                                                           |      | Y                        | N                             | N                                                 |                                | N                                                 |                                | N                                                 |
| CC0171      | TonB-dependent receptor                                                                                                        |      | N                        | N                             | N                                                 |                                | N                                                 |                                | N                                                 |
| CC0172      | General secretion pathway protein C                                                                                            |      | Y                        | Y                             | N                                                 |                                | N                                                 |                                | N                                                 |
| CC0173      | General secretion pathway protein D                                                                                            |      | Y                        | N                             | N                                                 |                                | N                                                 |                                | N                                                 |
| CC0174      | General secretion pathway protein E                                                                                            |      | Y                        | Y                             | N                                                 |                                | N                                                 |                                | N                                                 |
| CC0175      | General secretion pathway protein F                                                                                            |      | Y                        | Y                             | N                                                 |                                | N                                                 |                                | N                                                 |
| CC0176      | General secretion pathway protein G                                                                                            |      | Y                        | Y                             | N                                                 |                                | N                                                 |                                | N                                                 |
| CC0177      | General secretion pathway protein H                                                                                            |      | Y                        | Y                             | N                                                 |                                | N                                                 |                                | N                                                 |
| CC0178      | General secretion pathway protein I                                                                                            |      | Y                        | Y                             | N                                                 |                                | N                                                 |                                | N                                                 |
| CC0179      | General secretion pathway protein J                                                                                            |      | Y                        | Y                             | N                                                 |                                | N                                                 |                                | N                                                 |
| CC0180      | General secretion pathway protein K                                                                                            |      | N                        | N                             | N                                                 |                                | N                                                 |                                | N                                                 |
| CC0181      | General secretion pathway protein L                                                                                            |      | Y                        | Y                             | N                                                 |                                | N                                                 |                                | N                                                 |
| CC0182      | General secretion pathway protein M                                                                                            |      | Y                        | Y                             | Y                                                 | Patchy/Spotty                  | Y                                                 | Patchy/Spotty                  | Y                                                 |

| Gene Number | Annotation                                                      | Gene | Entry Vector Constructed | Entry Vector Sequence Correct | Localized and Sequence-verified C-terminal Fusion | Localization w/ C-terminal Tag | Localized and Sequence-verified N-terminal Fusion | Localization w/ N-terminal Tag | Protein Localized as Both N- or C-terminal Fusion |
|-------------|-----------------------------------------------------------------|------|--------------------------|-------------------------------|---------------------------------------------------|--------------------------------|---------------------------------------------------|--------------------------------|---------------------------------------------------|
| CC0183      | General secretion pathway protein N                             |      | Y                        | Y                             | N                                                 |                                | N                                                 |                                | N                                                 |
| CC0184      | Peptidase family A24                                            |      | Y                        | Y                             | N                                                 |                                | N                                                 |                                | N                                                 |
| CC0185      | TonB-dependent receptor                                         |      | Y                        | Y                             | N                                                 |                                | N                                                 |                                | N                                                 |
| CC0186      | Guanine-hypoxanthine permease                                   |      | Y                        | Y                             | N                                                 |                                | N                                                 |                                | N                                                 |
| CC0187      | NUP-family purine nucleoside permease                           |      | N                        | N                             | N                                                 |                                | N                                                 |                                | N                                                 |
| CC0188      | ABC transporter ATP-binding protein                             |      | N                        | N                             | N                                                 |                                | N                                                 |                                | N                                                 |
| CC0189      | Hypothetical cytosolic protein                                  |      | Y                        | N                             | N                                                 |                                | N                                                 |                                | N                                                 |
| CC0190      | Acyl-CoA hydrolase                                              |      | Y                        | Y                             | N                                                 |                                | N                                                 |                                | N                                                 |
| CC0191      | N-acetylglutamate synthase domain protein                       |      | Y                        | N                             | N                                                 |                                | N                                                 |                                | N                                                 |
| CC0192      | Long-chain-fatty-acid--CoA ligase                               |      | Y                        | Y                             | N                                                 |                                | N                                                 |                                | N                                                 |
| CC0193      | 3-isopropylmalate dehydrogenase                                 |      | Y                        | Y                             | N                                                 |                                | N                                                 |                                | N                                                 |
| CC0194      | Hypothetical cytosolic protein                                  |      | Y                        | Y                             | N                                                 |                                | N                                                 |                                | N                                                 |
| CC0195      | 3-isopropylmalate dehydratase small subunit                     |      | Y                        | Y                             | N                                                 |                                | N                                                 |                                | N                                                 |
| CC0196      | 3-isopropylmalate dehydratase large subunit                     |      | Y                        | Y                             | N                                                 |                                | N                                                 |                                | N                                                 |
| CC0197      | LSU ribosomal protein L19P                                      |      | Y                        | Y                             | N                                                 |                                | N                                                 |                                | N                                                 |
| CC0198      | tRNA (Guanine-N1) -methyltransferase                            |      | Y                        | Y                             | N                                                 |                                | N                                                 |                                | N                                                 |
| CC0199      | Hypothetical protein                                            |      | Y                        | Y                             | N                                                 |                                | N                                                 |                                | N                                                 |
| CC0200      | 2OG-Fe(II) oxygenase superfamily protein                        |      | Y                        | Y                             | N                                                 |                                | N                                                 |                                | N                                                 |
| CC0201      | Outer membrane protein                                          |      | Y                        | Y                             | Y                                                 | Patchy/Spotty                  | N                                                 |                                | N                                                 |
| CC0202      | DesA-family fatty acid desaturase                               |      | N                        | N                             | N                                                 |                                | N                                                 |                                | N                                                 |
| CC0203      | Sterol desaturase family protein                                |      | Y                        | Y                             | N                                                 |                                | N                                                 |                                | N                                                 |
| CC0204      | Glutathione-regulated potassium-efflux system protein kefB      | kefB | Y                        | Y                             | N                                                 |                                | N                                                 |                                | N                                                 |
| CC0205      | NAD(P)H oxidoreductase yheR                                     |      | Y                        | Y                             | N                                                 |                                | N                                                 |                                | N                                                 |
| CC0206      | Succinyl-CoA:3-ketoacid-coenzyme A transferase subunit A        |      | Y                        | Y                             | N                                                 |                                | N                                                 |                                | N                                                 |
| CC0207      | Succinyl-CoA:3-ketoacid-coenzyme A transferase subunit B        |      | Y                        | Y                             | N                                                 |                                | N                                                 |                                | N                                                 |
| CC0208      | Probable transcriptional regulator syrB                         | syrB | Y                        | Y                             | N                                                 |                                | N                                                 |                                | N                                                 |
| CC0209      | Undecaprenyl-phosphomannose:protein mannosyltransferase         |      | N                        | N                             | N                                                 |                                | N                                                 |                                | N                                                 |
| CC0210      | TonB-dependent receptor                                         |      | Y                        | Y                             | N                                                 |                                | N                                                 |                                | N                                                 |
| CC0211      | Agmatine deiminase                                              |      | Y                        | Y                             | N                                                 |                                | N                                                 |                                | N                                                 |
| CC0212      | N-carbamoylputrescine amidase                                   |      | Y                        | Y                             | N                                                 |                                | N                                                 |                                | N                                                 |
| CC0213      | Ribosomal-protein-alanine acetyltransferase                     |      | Y                        | Y                             | N                                                 |                                | N                                                 |                                | N                                                 |
| CC0214      | TonB-dependent receptor                                         |      | Y                        | Y                             | N                                                 |                                | N                                                 |                                | N                                                 |
| CC0215      | Hypothetical cytosolic protein                                  |      | Y                        | N                             | N                                                 |                                | N                                                 |                                | N                                                 |
| CC0216      | Conserved hypothetical protein                                  |      | Y                        | Y                             | N                                                 |                                | N                                                 |                                | N                                                 |
| CC0217      | Thiol:disulfide interchange protein DsbD                        |      | Y                        | Y                             | N                                                 |                                | N                                                 |                                | N                                                 |
| CC0218      | Hypothetical protein                                            |      | Y                        | N                             | N                                                 |                                | N                                                 |                                | N                                                 |
| CC0219      | Hypothetical protein                                            |      | Y                        | Y                             | N                                                 |                                | N                                                 |                                | N                                                 |
| CC0220      | Thiol-disulfide isomerase and thioredoxins                      |      | Y                        | Y                             | N                                                 |                                | N                                                 |                                | N                                                 |
| CC0221      | Hypothetical protein                                            |      | Y                        | Y                             | N                                                 |                                | N                                                 |                                | N                                                 |
| CC0222      | Glucose-6-phosphate isomerase / Glucose-6-phosphate 1-epimerase |      | N                        | N                             | N                                                 |                                | N                                                 |                                | N                                                 |
| CC0223      | Esterase Lipase Family Protein                                  |      | Y                        | Y                             | N                                                 |                                | N                                                 |                                | N                                                 |
| CC0224      | Conserved hypothetical protein (putative porin)                 |      | Y                        | Y                             | N                                                 |                                | N                                                 |                                | N                                                 |
| CC0225      | Hypothetical protein                                            |      | Y                        | Y                             | N                                                 |                                | N                                                 |                                | N                                                 |
| CC0226      | Hypothetical protein                                            |      | Y                        | Y                             | N                                                 |                                | N                                                 |                                | N                                                 |
| CC0227      | Methyltransferase                                               |      | Y                        | N                             | N                                                 |                                | N                                                 |                                | N                                                 |
| CC0228      | Hypothetical membrane spanning protein                          |      | Y                        | Y                             | Y                                                 | Patchy/Spotty                  | N                                                 |                                | N                                                 |
| CC0229      | CAAX amino terminal protease family protein                     |      | Y                        | Y                             | N                                                 |                                | N                                                 |                                | N                                                 |

| Gene Number | Annotation                                          | Gene | Entry Vector Constructed | Entry Vector Sequence Correct | Localized and Sequence-verified C-terminal Fusion | Localization w/ C-terminal Tag | Localized and Sequence-verified N-terminal Fusion | Localization w/ N-terminal Tag | Protein Localized as Both N- or C-terminal Fusion |
|-------------|-----------------------------------------------------|------|--------------------------|-------------------------------|---------------------------------------------------|--------------------------------|---------------------------------------------------|--------------------------------|---------------------------------------------------|
| CC0230      | Ribosomal large subunit pseudouridine synthase B    |      | Y                        | Y                             | N                                                 |                                | N                                                 |                                | N                                                 |
| CC0231      | tRNA-specific adenosine deaminase                   |      | Y                        | Y                             | N                                                 |                                | N                                                 |                                | N                                                 |
| CC0232      | Hypothetical protein                                |      | Y                        | Y                             | N                                                 |                                | N                                                 |                                | N                                                 |
| CC0233      | UDP-N-acetylglucosamine 4,6-dehydratase             |      | Y                        | Y                             | N                                                 |                                | N                                                 |                                | N                                                 |
| CC0234      | WecE-family cell wall biogenesis enzyme             |      | Y                        | Y                             | N                                                 |                                | N                                                 |                                | N                                                 |
| CC0235      | Hypothetical protein                                |      | Y                        | Y                             | N                                                 |                                | N                                                 |                                | N                                                 |
| CC0236      | Conserved hypothetical protein                      |      | Y                        | Y                             | N                                                 |                                | N                                                 |                                | N                                                 |
| CC0237      | Two-component response regulator chvI               | chvI | Y                        | N                             | N                                                 |                                | N                                                 |                                | N                                                 |
| CC0238      | Two-component sensor histidine kinase chvG          |      | Y                        | Y                             | Y                                                 | Patchy/Spotty                  | Y                                                 | Patchy/Spotty                  | Y                                                 |
| CC0239      | HPR(SER) kinase / phosphatase                       |      | N                        | N                             | N                                                 |                                | N                                                 |                                | N                                                 |
| CC0240      | PTS system, IIA component                           |      | Y                        | Y                             | N                                                 |                                | N                                                 |                                | N                                                 |
| CC0241      | Phosphocarrier protein HPr                          |      | N                        | N                             | N                                                 |                                | N                                                 |                                | N                                                 |
| CC0242      | Hypothetical protein                                |      | Y                        | Y                             | N                                                 |                                | N                                                 |                                | N                                                 |
| CC0243      | Hypothetical protein                                |      | Y                        | Y                             | N                                                 |                                | N                                                 |                                | N                                                 |
| CC0244      | Hydrolase (HAD superfamily)                         |      | Y                        | Y                             | N                                                 |                                | N                                                 |                                | N                                                 |
| CC0245      | Pterin-4-alpha-carbinolamine dehydratase            |      | Y                        | Y                             | N                                                 |                                | N                                                 |                                | N                                                 |
| CC0246      | Cyclohexanol dehydrogenase                          |      | Y                        | Y                             | N                                                 |                                | N                                                 |                                | N                                                 |
| CC0247      | Two-component receiver protein                      |      | Y                        | Y                             | N                                                 |                                | N                                                 |                                | N                                                 |
| CC0248      | Sensor histidine protein kinase                     |      | Y                        | Y                             | N                                                 |                                | Y                                                 | Patchy/Spotty                  | N                                                 |
| CC0249      | SCO1/SenC family protein                            |      | Y                        | Y                             | N                                                 |                                | N                                                 |                                | N                                                 |
| CC0250      | Poly(3-hydroxyalkanoate) depolymerase               |      | Y                        | Y                             | Y                                                 | Central - Focus                | Y                                                 | Patchy/Spotty                  | Y                                                 |
| CC0251      | Zinc metalloprotease                                |      | Y                        | Y                             | N                                                 |                                | N                                                 |                                | N                                                 |
| CC0252      | Multimodular transpeptidase-transglycosylase PBP 1A |      | Y                        | Y                             | N                                                 |                                | N                                                 |                                | N                                                 |
| CC0253      | Aspartate-semialdehyde dehydrogenase                |      | Y                        | Y                             | N                                                 |                                | N                                                 |                                | N                                                 |
| CC0254      | RarD family membrane permease                       |      | Y                        | Y                             | N                                                 |                                | N                                                 |                                | N                                                 |
| CC0255      | Esterase                                            |      | Y                        | Y                             | N                                                 |                                | N                                                 |                                | N                                                 |
| CC0256      | Pyridoxine kinase                                   |      | Y                        | Y                             | N                                                 |                                | N                                                 |                                | N                                                 |
| CC0257      | Adenosylhomocysteinase                              |      | Y                        | Y                             | N                                                 |                                | N                                                 |                                | N                                                 |
| CC0258      | Hypothetical protein                                |      | N                        | N                             | N                                                 |                                | N                                                 |                                | N                                                 |
| CC0259      | Glutathione S-transferase                           |      | Y                        | Y                             | N                                                 |                                | N                                                 |                                | N                                                 |
| CC0260      | Ribonucleoside-diphosphate reductase beta chain     |      | Y                        | N                             | N                                                 |                                | N                                                 |                                | N                                                 |
| CC0261      | Ketopantoate reductase PanE/ApbA family protein     |      | Y                        | Y                             | N                                                 |                                | N                                                 |                                | N                                                 |
| CC0262      | Hypothetical protein                                |      | Y                        | Y                             | N                                                 |                                | N                                                 |                                | N                                                 |
| CC0263      | C4-dicarboxylate transport protein                  |      | Y                        | N                             | N                                                 |                                | N                                                 |                                | N                                                 |
| CC0264      | AMP nucleosidase                                    |      | Y                        | Y                             | N                                                 |                                | N                                                 |                                | N                                                 |
| CC0265      | 3-ketoacyl-CoA thiolase                             |      | Y                        | Y                             | N                                                 |                                | N                                                 |                                | N                                                 |
| CC0266      | MutT-like protein                                   |      | N                        | N                             | N                                                 |                                | N                                                 |                                | N                                                 |
| CC0267      | DNA polymerase III subunit gamma/tau                |      | Y                        | Y                             | N                                                 |                                | N                                                 |                                | N                                                 |
| CC0268      | Hypothetical transcriptional regulatory protein     |      | Y                        | Y                             | N                                                 |                                | N                                                 |                                | N                                                 |
| CC0269      | Recombination protein recR                          | recR | Y                        | Y                             | N                                                 |                                | N                                                 |                                | N                                                 |
| CC0270      | Hypothetical protein                                |      | Y                        | Y                             | N                                                 |                                | N                                                 |                                | N                                                 |
| CC0271      | RmuC family protein                                 |      | Y                        | Y                             | N                                                 |                                | N                                                 |                                | N                                                 |
| CC0272      | Peptide deformylase                                 |      | Y                        | Y                             | N                                                 |                                | N                                                 |                                | N                                                 |
| CC0273      | Transposase                                         |      | Y                        | Y                             | N                                                 |                                | N                                                 |                                | N                                                 |
| CC0274      | Hypothetical protein                                |      | Y                        | Y                             | N                                                 |                                | N                                                 |                                | N                                                 |
| CC0275      | Succinyl-diaminopimelate desuccinylase              |      | Y                        | Y                             | N                                                 |                                | N                                                 |                                | N                                                 |
| CC0276      | Glutaminase                                         |      | Y                        | Y                             | N                                                 |                                | Y                                                 | Middle AND Pole                | N                                                 |
| CC0277      | NAD(P)H dehydrogenase [quinone]                     |      | Y                        | N                             | N                                                 |                                | N                                                 |                                | N                                                 |
| CC0278      | tRNA pseudouridine synthase A                       |      | Y                        | Y                             | N                                                 |                                | N                                                 |                                | N                                                 |

| Gene Number | Annotation                                                     | Gene | Entry Vector Constructed | Entry Vector Sequence Correct | Localized and Sequence-verified C-terminal Fusion | Localization w/ C-terminal Tag | Localized and Sequence-verified N-terminal Fusion | Localization w/ N-terminal Tag | Protein Localized as Both N- or C-terminal Fusion |
|-------------|----------------------------------------------------------------|------|--------------------------|-------------------------------|---------------------------------------------------|--------------------------------|---------------------------------------------------|--------------------------------|---------------------------------------------------|
| CC0279      | Methionyl-tRNA formyltransferase                               |      | Y                        | Y                             | N                                                 |                                | N                                                 |                                | N                                                 |
| CC0280      | Conserved cell surface protein                                 |      | Y                        | Y                             | N                                                 |                                | N                                                 |                                | N                                                 |
| CC0281      | 2,3,4,5-tetrahydropyridine-2-carboxylate N-succinyltransferase |      | Y                        | Y                             | N                                                 |                                | N                                                 |                                | N                                                 |
| CC0282      | Hydrolase (HAD superfamily)                                    |      | Y                        | Y                             | N                                                 |                                | N                                                 |                                | N                                                 |
| CC0283      | Acetylglutamate kinase                                         |      | Y                        | Y                             | N                                                 |                                | N                                                 |                                | N                                                 |
| CC0284      | Two-component receiver domain protein lovR                     | lovR | Y                        | Y                             | N                                                 |                                | N                                                 |                                | N                                                 |
| CC0285      | Photosensory histidine protein kinase lovK                     | lovK | Y                        | Y                             | N                                                 |                                | N                                                 |                                | N                                                 |
| CC0286      | Sulfate-binding protein                                        |      | Y                        | Y                             | N                                                 |                                | N                                                 |                                | N                                                 |
| CC0287      | Hypothetical protein                                           |      | N                        | N                             | N                                                 |                                | N                                                 |                                | N                                                 |
| CC0288      | Autotransporter protein                                        |      | N                        | N                             | N                                                 |                                | N                                                 |                                | N                                                 |
| CC0289      | Phosphate regulon sensor protein phoR                          | phoR | Y                        | Y                             | Y                                                 | Patchy/Spotty                  | Y                                                 | Patchy/Spotty                  | Y                                                 |
| CC0290      | Phosphate transport system permease protein pstC               | pstC | Y                        | Y                             | N                                                 |                                | N                                                 |                                | N                                                 |
| CC0291      | Phosphate transport system permease protein pstA               | pstA | Y                        | Y                             | N                                                 |                                | N                                                 |                                | N                                                 |
| CC0292      | Phosphate transport ATP-binding protein pstB                   | pstB | Y                        | N                             | N                                                 |                                | N                                                 |                                | N                                                 |
| CC0293      | Phosphate transport system protein phoU                        | phoU | Y                        | Y                             | N                                                 |                                | N                                                 |                                | N                                                 |
| CC0294      | Phosphate regulon response regulator PhoB                      | phoB | Y                        | Y                             | N                                                 |                                | N                                                 |                                | N                                                 |
| CC0295      | Two-component response regulator                               |      | Y                        | Y                             | N                                                 |                                | N                                                 |                                | N                                                 |
| CC0296      | Hypothetical protein                                           |      | Y                        | N                             | N                                                 |                                | N                                                 |                                | N                                                 |
| CC0297      | Phosphoribosylamine--glycine ligase                            |      | Y                        | Y                             | N                                                 |                                | N                                                 |                                | N                                                 |
| CC0298      | Glyoxalase superfamily protein                                 |      | Y                        | Y                             | N                                                 |                                | N                                                 |                                | N                                                 |
| CC0299      | Phosphotransferase family protein                              |      | Y                        | N                             | N                                                 |                                | N                                                 |                                | N                                                 |
| CC0300      | Parathion hydrolase                                            |      | Y                        | Y                             | Y                                                 | Patchy/Spotty                  | N                                                 |                                | N                                                 |
| CC0301      | Tetraacyldisaccharide 4'-kinase                                |      | Y                        | Y                             | N                                                 |                                | N                                                 |                                | N                                                 |
| CC0302      | 3-deoxy-D-manno-octulosonic-acid transferase                   |      | Y                        | Y                             | N                                                 |                                | N                                                 |                                | N                                                 |
| CC0303      | Cobalt-zinc-cadmium resistance protein czcD                    | czcD | Y                        | Y                             | N                                                 |                                | N                                                 |                                | N                                                 |
| CC0304      | Hypothetical lipoprotein                                       |      | Y                        | Y                             | N                                                 |                                | N                                                 |                                | N                                                 |
| CC0305      | Phospholipid-lipopolysaccharide ABC transporter                |      | Y                        | Y                             | N                                                 |                                | N                                                 |                                | N                                                 |
| CC0306      | Hypothetical protein                                           |      | Y                        | Y                             | N                                                 |                                | N                                                 |                                | N                                                 |
| CC0307      | Hypothetical cytosolic protein                                 |      | Y                        | Y                             | N                                                 |                                | N                                                 |                                | N                                                 |
| CC0308      | Myo-inositol-1(or 4)-monophosphatase                           |      | Y                        | Y                             | N                                                 |                                | N                                                 |                                | N                                                 |
| CC0309      | Microcin-processing peptidase 1 (PmbA)                         | pmbA | Y                        | Y                             | N                                                 |                                | N                                                 |                                | N                                                 |
| CC0310      | Hypothetical membrane spanning protein                         |      | Y                        | Y                             | N                                                 |                                | N                                                 |                                | N                                                 |
| CC0311      | Hypothetical protein                                           |      | Y                        | Y                             | N                                                 |                                | N                                                 |                                | N                                                 |
| CC0312      | Hypothetical protein                                           |      | Y                        | Y                             | N                                                 |                                | N                                                 |                                | N                                                 |
| CC0313      | 3-polyprenyl-4-hydroxybenzoate decarboxylase                   |      | Y                        | Y                             | Y                                                 | Patchy/Spotty                  | Y                                                 | Patchy/Spotty                  | Y                                                 |
| CC0314      | Glutamate 5-kinase                                             |      | Y                        | Y                             | N                                                 |                                | N                                                 |                                | N                                                 |
| CC0315      | GTP-binding protein CgtA (probably involved in DNA repair)     | cgtA | Y                        | Y                             | N                                                 |                                | N                                                 |                                | N                                                 |
| CC0316      | Hypothetical protein                                           |      | Y                        | Y                             | N                                                 |                                | N                                                 |                                | N                                                 |
| CC0317      | Acetyltransferase, GNAT family                                 |      | Y                        | Y                             | N                                                 |                                | N                                                 |                                | N                                                 |
| CC0318      | LSU ribosomal protein L27P                                     |      | Y                        | Y                             | N                                                 |                                | N                                                 |                                | N                                                 |
| CC0319      | LSU ribosomal protein L21P                                     |      | Y                        | Y                             | N                                                 |                                | N                                                 |                                | N                                                 |
| CC0320      | Conserved hypothetical protein                                 |      | Y                        | Y                             | N                                                 |                                | N                                                 |                                | N                                                 |
| CC0321      | Low-affinity zinc transport protein                            |      | Y                        | Y                             | N                                                 |                                | N                                                 |                                | N                                                 |
| CC0322      | ToIR protein                                                   |      | Y                        | Y                             | N                                                 |                                | N                                                 |                                | N                                                 |
| CC0323      | Vegetatible incompatibility protein HET-E-1                    |      | Y                        | N                             | N                                                 |                                | N                                                 |                                | N                                                 |

| Gene Number | Annotation                                                                                  | Gene | Entry Vector Constructed | Entry Vector Sequence Correct | Localized and Sequence-verified C-terminal Fusion | Localization w/ C-terminal Tag | Localized and Sequence-verified N-terminal Fusion | Localization w/ N-terminal Tag | Protein Localized as Both N- or C-terminal Fusion |
|-------------|---------------------------------------------------------------------------------------------|------|--------------------------|-------------------------------|---------------------------------------------------|--------------------------------|---------------------------------------------------|--------------------------------|---------------------------------------------------|
| CC0324      | Nitrobenzoate nitroreductase                                                                |      | Y                        | Y                             | N                                                 |                                | N                                                 |                                | N                                                 |
| CC0325      | Monofunctional biosynthetic peptidoglycan transglycosylase                                  |      | Y                        | Y                             | N                                                 |                                | N                                                 |                                | N                                                 |
| CC0326      | Ribosomal-protein-alanine acetyltransferase                                                 |      | Y                        | Y                             | N                                                 |                                | N                                                 |                                | N                                                 |
| CC0327      | Molybdenum-pterin binding protein mopB                                                      | mopB | N                        | N                             | N                                                 |                                | N                                                 |                                | N                                                 |
| CC0328      | Molybdate-binding protein                                                                   |      | Y                        | N                             | N                                                 |                                | N                                                 |                                | N                                                 |
| CC0329      | Molybdenum transport system permease protein modB                                           |      | N                        | N                             | N                                                 |                                | N                                                 |                                | N                                                 |
| CC0330      | LytTr DNA-binding domain                                                                    |      | Y                        | Y                             | N                                                 |                                | N                                                 |                                | N                                                 |
| CC0331      | Hypothetical protein                                                                        |      | Y                        | N                             | N                                                 |                                | N                                                 |                                | N                                                 |
| CC0332      | Hypothetical secreted protein                                                               |      | Y                        | Y                             | N                                                 |                                | N                                                 |                                | N                                                 |
| CC0333      | Lignostilbene-alpha,beta-dioxygenase                                                        |      | Y                        | Y                             | N                                                 |                                | N                                                 |                                | N                                                 |
| CC0334      | Transcriptional regulator, TetR family                                                      |      | Y                        | Y                             | N                                                 |                                | Y                                                 | Patchy/Spotty                  | N                                                 |
| CC0335      | TonB-dependent receptor                                                                     |      | N                        | N                             | N                                                 |                                | N                                                 |                                | N                                                 |
| CC0336      | Transporter                                                                                 |      | Y                        | Y                             | N                                                 |                                | N                                                 |                                | N                                                 |
| CC0337      | Succinyl-CoA synthetase beta chain                                                          |      | Y                        | Y                             | N                                                 |                                | N                                                 |                                | N                                                 |
| CC0338      | Succinyl-CoA synthetase alpha chain                                                         | sucD | Y                        | Y                             | N                                                 |                                | N                                                 |                                | N                                                 |
| CC0339      | 2-oxoglutarate dehydrogenase E1 component                                                   | odhA | N                        | N                             | N                                                 |                                | N                                                 |                                | N                                                 |
| CC0340      | Dihydrolipoamide succinyltransferase component (E2) of 2-oxoglutarate dehydrogenase complex | odhB | Y                        | N                             | N                                                 |                                | N                                                 |                                | N                                                 |
| CC0341      | IroE protein                                                                                |      | N                        | N                             | N                                                 |                                | N                                                 |                                | N                                                 |
| CC0342      | Dihydrolipoamide dehydrogenase                                                              |      | Y                        | Y                             | N                                                 |                                | N                                                 |                                | N                                                 |
| CC0343      | Probable chemoreceptor Y4FA                                                                 |      | Y                        | Y                             | Y                                                 | Pole                           | N                                                 |                                | N                                                 |
| CC0344      | Integrase/recombinase (XerC/CodV family)                                                    |      | N                        | N                             | N                                                 |                                | N                                                 |                                | N                                                 |
| CC0345      | Hypothetical protein                                                                        |      | Y                        | Y                             | N                                                 |                                | N                                                 |                                | N                                                 |
| CC0346      | Primosomal protein N'                                                                       |      | Y                        | Y                             | N                                                 |                                | N                                                 |                                | N                                                 |
| CC0347      | Integral membrane protein                                                                   |      | Y                        | Y                             | N                                                 |                                | N                                                 |                                | N                                                 |
| CC0348      | O-antigen acetylase                                                                         |      | Y                        | Y                             | N                                                 |                                | N                                                 |                                | N                                                 |
| CC0349      | Hypothetical protein                                                                        |      | Y                        | Y                             | N                                                 |                                | N                                                 |                                | N                                                 |
| CC0350      | Hypothetical protein with pentapeptide repeats                                              |      | N                        | N                             | N                                                 |                                | N                                                 |                                | N                                                 |
| CC0351      | Outer membrane protein                                                                      |      | Y                        | Y                             | N                                                 |                                | N                                                 |                                | N                                                 |
| CC0352      | secretory tripeptidyl aminopeptidase                                                        |      | Y                        | Y                             | N                                                 |                                | N                                                 |                                | N                                                 |
| CC0353      | Delta3,5-delta2,4-dienoyl-CoA isomerase precursor                                           |      | Y                        | Y                             | N                                                 |                                | N                                                 |                                | N                                                 |
| CC0354      | SH3 domain-containing cell surface protein                                                  |      | Y                        | Y                             | N                                                 |                                | N                                                 |                                | N                                                 |
| CC0355      | Putative hydrolase                                                                          |      | Y                        | Y                             | N                                                 |                                | N                                                 |                                | N                                                 |
| CC0356      | Conserved hypothetical protein                                                              |      | N                        | N                             | N                                                 |                                | N                                                 |                                | N                                                 |
| CC0357      | Zinc uptake regulation protein                                                              |      | Y                        | Y                             | N                                                 |                                | N                                                 |                                | N                                                 |
| CC0358      | Acid phosphatase                                                                            |      | Y                        | Y                             | N                                                 |                                | N                                                 |                                | N                                                 |
| CC0359      | Deoxyhypusine synthase                                                                      |      | Y                        | Y                             | N                                                 |                                | N                                                 |                                | N                                                 |
| CC0360      | Ornithine decarboxylase                                                                     |      | Y                        | Y                             | N                                                 |                                | N                                                 |                                | N                                                 |
| CC0361      | Phosphonates transport ATP-binding protein phnC                                             |      | Y                        | Y                             | N                                                 |                                | N                                                 |                                | N                                                 |
| CC0362      | Phosphonates-binding protein                                                                |      | Y                        | N                             | N                                                 |                                | N                                                 |                                | N                                                 |
| CC0363      | Phosphonates transport system permease protein phnE                                         |      | Y                        | N                             | N                                                 |                                | N                                                 |                                | N                                                 |
| CC0364      | Magnesium and cobalt efflux protein corC homolog                                            |      | Y                        | Y                             | N                                                 |                                | N                                                 |                                | N                                                 |
| CC0365      | ATP synthase B chain                                                                        |      | Y                        | Y                             | N                                                 |                                | N                                                 |                                | N                                                 |
| CC0366      | ATP synthase B' chain                                                                       |      | N                        | N                             | N                                                 |                                | N                                                 |                                | N                                                 |



| Gene Number | Annotation                                       | Gene | Entry Vector Constructed | Entry Vector Sequence Correct | Localized and Sequence-verified C-terminal Fusion | Localization w/ C-terminal Tag | Localized and Sequence-verified N-terminal Fusion | Localization w/ N-terminal Tag | Protein Localized as Both N- or C-terminal Fusion |
|-------------|--------------------------------------------------|------|--------------------------|-------------------------------|---------------------------------------------------|--------------------------------|---------------------------------------------------|--------------------------------|---------------------------------------------------|
| CC0367      | ATP synthase C chain                             |      | Y                        | Y                             | N                                                 |                                | N                                                 |                                | N                                                 |
| CC0368      | ATP synthase A chain                             |      | Y                        | Y                             | Y                                                 | Patchy/Spotty                  | N                                                 |                                | N                                                 |
| CC0369      | Putative ATP synthase protein I                  |      | Y                        | Y                             | N                                                 |                                | N                                                 |                                | N                                                 |
| CC0370      |                                                  |      | Y                        | Y                             | N                                                 |                                | N                                                 |                                | N                                                 |
| CC0371      | Conserved hypothetical protein                   |      | Y                        | Y                             | N                                                 |                                | N                                                 |                                | N                                                 |
| CC0372      | Hypothetical membrane spanning protein           |      | N                        | N                             | N                                                 |                                | N                                                 |                                | N                                                 |
| CC0373      | Chromosome partition protein smc                 |      | N                        | N                             | N                                                 |                                | N                                                 |                                | N                                                 |
| CC0374      | Thiol:disulfide interchange protein dsbA         |      | N                        | N                             | N                                                 |                                | N                                                 |                                | N                                                 |
| CC0375      | Thiol:disulfide interchange protein dsbA         |      | Y                        | Y                             | N                                                 |                                | N                                                 |                                | N                                                 |
| CC0376      | Hypothetical cytosolic protein                   |      | Y                        | Y                             | N                                                 |                                | N                                                 |                                | N                                                 |
| CC0377      | A/G-specific adenine DNA glycosylase             |      | N                        | N                             | N                                                 |                                | N                                                 |                                | N                                                 |
| CC0378      | Adenine-specific methyltransferase ccrM          | ccrM | Y                        | Y                             | N                                                 |                                | N                                                 |                                | N                                                 |
| CC0379      | Ribonuclease HII                                 |      | N                        | N                             | N                                                 |                                | N                                                 |                                | N                                                 |
| CC0380      | Glucan endo-1,3-beta-glucosidase                 |      | Y                        | Y                             | N                                                 |                                | N                                                 |                                | N                                                 |
| CC0381      | Multidrug resistance protein                     |      | Y                        | Y                             | Y                                                 | Patchy/Spotty                  | N                                                 |                                | N                                                 |
| CC0382      | DNA-3-methyladenine glycosylase                  |      | Y                        | Y                             | Y                                                 | Middle OR Pole                 | N                                                 |                                | N                                                 |
| CC0383      | Hypothetical protein                             |      | Y                        | Y                             | N                                                 |                                | N                                                 |                                | N                                                 |
| CC0384      | Esterase Lipase Family Protein                   |      | Y                        | Y                             | N                                                 |                                | N                                                 |                                | N                                                 |
| CC0385      | Aminomethyltransferase family protein            |      | N                        | N                             | N                                                 |                                | N                                                 |                                | N                                                 |
| CC0386      | ADP-heptose-LPS heptosyltransferase              |      | Y                        | Y                             | N                                                 |                                | N                                                 |                                | N                                                 |
| CC0387      | Conserved hypothetical protein                   |      | Y                        | Y                             | N                                                 |                                | N                                                 |                                | N                                                 |
| CC0388      | Dihydroorotase                                   |      | Y                        | Y                             | N                                                 |                                | N                                                 |                                | N                                                 |
| CC0389      | RNA polymerase sigma factor                      |      | Y                        | Y                             | Y                                                 | Middle OR Pole                 | Y                                                 | Middle OR Pole                 | Y                                                 |
| CC0390      | Hypothetical cytosolic protein                   |      | Y                        | Y                             | N                                                 |                                | N                                                 |                                | N                                                 |
| CC0391      | Feruloyl-CoA synthetase                          |      | Y                        | Y                             | N                                                 |                                | N                                                 |                                | N                                                 |
| CC0392      | Conserved hypothetical protein                   |      | N                        | N                             | N                                                 |                                | N                                                 |                                | N                                                 |
| CC0393      | Acetolactate synthase                            |      | Y                        | Y                             | N                                                 |                                | N                                                 |                                | N                                                 |
| CC0394      | Hypothetical protein                             |      | Y                        | Y                             | N                                                 |                                | N                                                 |                                | N                                                 |
| CC0395      | Zinc metallohydrolase, glyoxalase II family      |      | N                        | N                             | N                                                 |                                | N                                                 |                                | N                                                 |
| CC0396      | Transcriptional regulator, MarR family           |      | Y                        | Y                             | N                                                 |                                | N                                                 |                                | N                                                 |
| CC0397      | Delta(3)-cis-delta(2)-trans-enoyl-CoA isomerase  |      | Y                        | N                             | N                                                 |                                | N                                                 |                                | N                                                 |
| CC0398      | Short chain dehydrogenase                        |      | Y                        | Y                             | N                                                 |                                | N                                                 |                                | N                                                 |
| CC0399      | Hypothetical protein                             |      | Y                        | Y                             | N                                                 |                                | N                                                 |                                | N                                                 |
| CC0400      | Short chain dehydrogenase                        |      | Y                        | Y                             | N                                                 |                                | N                                                 |                                | N                                                 |
| CC0401      | DNA transformation protein tfoX                  | tfoX | Y                        | Y                             | N                                                 |                                | N                                                 |                                | N                                                 |
| CC0402      | Diamine acetyltransferase                        |      | Y                        | Y                             | N                                                 |                                | N                                                 |                                | N                                                 |
| CC0403      | Macrolide-efflux protein                         |      | Y                        | Y                             | N                                                 |                                | N                                                 |                                | N                                                 |
| CC0404      | Hypothetical protein                             |      | Y                        | Y                             | N                                                 |                                | N                                                 |                                | N                                                 |
| CC0405      | Acetyltransferase                                |      | Y                        | Y                             | N                                                 |                                | N                                                 |                                | N                                                 |
| CC0406      | Hypothetical protein                             |      | Y                        | Y                             | N                                                 |                                | N                                                 |                                | N                                                 |
| CC0407      | CoA pyrophosphatase                              |      | Y                        | Y                             | N                                                 |                                | N                                                 |                                | N                                                 |
| CC0408      | Poly(A) polymerase / tRNA-nucleotidyltransferase |      | N                        | N                             | N                                                 |                                | N                                                 |                                | N                                                 |
| CC0409      | GMP synthase [glutamine-hydrolyzing]             |      | Y                        | Y                             | N                                                 |                                | N                                                 |                                | N                                                 |
| CC0410      | Hypothetical protein                             |      | Y                        | Y                             | N                                                 |                                | N                                                 |                                | N                                                 |
| CC0411      | Hypothetical protein                             |      | Y                        | Y                             | N                                                 |                                | N                                                 |                                | N                                                 |
| CC0412      | Hypothetical protein                             |      | Y                        | Y                             | N                                                 |                                | N                                                 |                                | N                                                 |
| CC0413      | Hypothetical protein                             |      | Y                        | Y                             | N                                                 |                                | N                                                 |                                | N                                                 |
| CC0414      | Fasciclin domain cell surface protein            |      | Y                        | Y                             | N                                                 |                                | N                                                 |                                | N                                                 |
| CC0415      | Hypothetical protein                             |      | Y                        | Y                             | N                                                 |                                | N                                                 |                                | N                                                 |
| CC0416      | Dihydroneopterin aldolase                        |      | Y                        | Y                             | N                                                 |                                | N                                                 |                                | N                                                 |
| CC0417      | 3-oxoacyl-[acyl-carrier protein] reductase       |      | Y                        | N                             | N                                                 |                                | N                                                 |                                | N                                                 |

| Gene Number | Annotation                                                                                                             | Gene    | Entry Vector Constructed | Entry Vector Sequence Correct | Localized and Sequence-verified C-terminal Fusion | Localization w/ C-terminal Tag | Localized and Sequence-verified N-terminal Fusion | Localization w/ N-terminal Tag | Protein Localized as Both N- or C-terminal Fusion |
|-------------|------------------------------------------------------------------------------------------------------------------------|---------|--------------------------|-------------------------------|---------------------------------------------------|--------------------------------|---------------------------------------------------|--------------------------------|---------------------------------------------------|
| CC0418      | Phosphohydrolase (MutT/nudix family protein)                                                                           |         | Y                        | Y                             | N                                                 |                                | N                                                 |                                | N                                                 |
| CC0419      | Aldehyde dehydrogenase                                                                                                 |         | Y                        | Y                             | N                                                 |                                | N                                                 |                                | N                                                 |
| CC0420      | Hypothetical protein                                                                                                   |         | Y                        | Y                             | N                                                 |                                | N                                                 |                                | N                                                 |
| CC0421      | Hypothetical cytosolic protein                                                                                         |         | Y                        | Y                             | N                                                 |                                | N                                                 |                                | N                                                 |
| CC0422      | Hypothetical protein                                                                                                   |         | Y                        | Y                             | N                                                 |                                | N                                                 |                                | N                                                 |
| CC0423      | Hypothetical protein                                                                                                   |         | Y                        | Y                             | N                                                 |                                | N                                                 |                                | N                                                 |
| CC0424      | Transcriptional regulator, AsnC family                                                                                 |         | Y                        | Y                             | N                                                 |                                | N                                                 |                                | N                                                 |
| CC0425      | Conserved membrane-spanning protein                                                                                    |         | Y                        | Y                             | N                                                 |                                | N                                                 |                                | N                                                 |
| CC0426      | Amino acid permease                                                                                                    |         | Y                        | Y                             | N                                                 |                                | N                                                 |                                | N                                                 |
| CC0427      | Acyl-CoA dehydrogenase, short-chain specific                                                                           |         | Y                        | Y                             | N                                                 |                                | N                                                 |                                | N                                                 |
| CC0428      | Methyl-accepting chemotaxis protein                                                                                    |         | N                        | N                             | N                                                 |                                | N                                                 |                                | N                                                 |
| CC0429      | Hypothetical protein                                                                                                   |         | Y                        | Y                             | N                                                 |                                | N                                                 |                                | N                                                 |
| CC0430      | Methyl-accepting chemotaxis protein                                                                                    |         | Y                        | Y                             | Y                                                 | Pole                           | Y                                                 | Varied Focus                   | Y                                                 |
| CC0431      | Virus Protein                                                                                                          |         | Y                        | Y                             | N                                                 |                                | Y                                                 | Pole                           | N                                                 |
| CC0432      | Chemotaxis receiver domain protein cheYI                                                                               | cheYI   | Y                        | Y                             | N                                                 |                                | N                                                 |                                | N                                                 |
| CC0433      | Chemotaxis histidine kinase protein cheAI                                                                              | cheAI   | N                        | N                             | N                                                 |                                | N                                                 |                                | N                                                 |
| CC0434      | Chemotaxis protein cheW                                                                                                | cheW    | Y                        | N                             | N                                                 |                                | N                                                 |                                | N                                                 |
| CC0435      | Chemotaxis protein methyltransferase                                                                                   |         | Y                        | Y                             | N                                                 |                                | Y                                                 | Pole                           | N                                                 |
| CC0436      | Receiver domain-glutamate methylesterase cheBI                                                                         |         | Y                        | Y                             | N                                                 |                                | N                                                 |                                | N                                                 |
| CC0437      | Chemotaxis receiver domain protein cheYII                                                                              | cheYII  | Y                        | Y                             | N                                                 |                                | N                                                 |                                | N                                                 |
| CC0438      | Chemotaxis protein cheD                                                                                                | cheD    | Y                        | Y                             | N                                                 |                                | N                                                 |                                | N                                                 |
| CC0439      | cheU protein                                                                                                           | cheU    | Y                        | Y                             | N                                                 |                                | N                                                 |                                | N                                                 |
| CC0440      | CheYIII                                                                                                                | cheYIII | Y                        | Y                             | N                                                 |                                | N                                                 |                                | N                                                 |
| CC0441      | cheE protein                                                                                                           | cheE    | Y                        | Y                             | N                                                 |                                | N                                                 |                                | N                                                 |
| CC0442      | TonB-dependent receptor                                                                                                |         | Y                        | N                             | N                                                 |                                | N                                                 |                                | N                                                 |
| CC0443      | N-acetylglucosamine-6-phosphate deacetylase                                                                            |         | Y                        | Y                             | N                                                 |                                | N                                                 |                                | N                                                 |
| CC0444      | Glucosamine-6-phosphate deaminase                                                                                      |         | Y                        | Y                             | N                                                 |                                | N                                                 |                                | N                                                 |
| CC0445      | Transcriptional regulator, GntR family                                                                                 |         | Y                        | Y                             | N                                                 |                                | N                                                 |                                | N                                                 |
| CC0446      | N-acetyl-glucosamine/N-acetyl-chitin oligosaccharide outer membrane transporter nagA                                   | nagA    | Y                        | Y                             | N                                                 |                                | N                                                 |                                | N                                                 |
| CC0447      | Beta-N-acetylhexosaminidase                                                                                            |         | Y                        | N                             | N                                                 |                                | N                                                 |                                | N                                                 |
| CC0448      | Phosphoenolpyruvate-protein phosphotransferase / Phosphocarrier protein HPr / PTS system, glucose-specific IIA subunit |         | Y                        | Y                             | N                                                 |                                | N                                                 |                                | N                                                 |
| CC0449      | PTS system, N-acetylglucosamine-specific IIBC component                                                                |         | N                        | N                             | N                                                 |                                | N                                                 |                                | N                                                 |
| CC0450      | Na <sup>+</sup> /H <sup>+</sup> antiporter nhaA                                                                        | nhaA    | N                        | N                             | N                                                 |                                | N                                                 |                                | N                                                 |
| CC0451      | Zn-dependent hydrolase, glyoxalase II family                                                                           |         | Y                        | N                             | N                                                 |                                | N                                                 |                                | N                                                 |
| CC0452      | Hypothetical protein                                                                                                   |         | N                        | N                             | N                                                 |                                | N                                                 |                                | N                                                 |
| CC0453      | Ribosomal large subunit pseudouridine synthase D                                                                       |         | Y                        | Y                             | N                                                 |                                | N                                                 |                                | N                                                 |
| CC0454      | TonB-dependent receptor                                                                                                |         | Y                        | Y                             | N                                                 |                                | N                                                 |                                | N                                                 |
| CC0455      | Alkaline phosphatase                                                                                                   |         | Y                        | Y                             | N                                                 |                                | N                                                 |                                | N                                                 |
| CC0456      | Transporter, LysE family                                                                                               |         | Y                        | N                             | N                                                 |                                | N                                                 |                                | N                                                 |
| CC0457      | Phosphoribosyl-AMP cyclohydrolase                                                                                      |         | Y                        | Y                             | N                                                 |                                | N                                                 |                                | N                                                 |
| CC0458      | Hypothetical protein                                                                                                   |         | Y                        | Y                             | N                                                 |                                | N                                                 |                                | N                                                 |
| CC0459      | GTP cyclohydrolase I                                                                                                   |         | Y                        | Y                             | N                                                 |                                | N                                                 |                                | N                                                 |

| Gene Number | Annotation                                                                         | Gene | Entry Vector Constructed | Entry Vector Sequence Correct | Localized and Sequence-verified C-terminal Fusion | Localization w/ C-terminal Tag | Localized and Sequence-verified N-terminal Fusion | Localization w/ N-terminal Tag | Protein Localized as Both N- or C-terminal Fusion |
|-------------|------------------------------------------------------------------------------------|------|--------------------------|-------------------------------|---------------------------------------------------|--------------------------------|---------------------------------------------------|--------------------------------|---------------------------------------------------|
| CC0460      | CysteinyI-tRNA synthetase<br>putative polyketide cyclase-dehydrase/lipid           |      | Y                        | Y                             | N                                                 |                                | N                                                 |                                | N                                                 |
| CC0461      | transport protein                                                                  |      | Y                        | Y                             | N                                                 |                                | N                                                 |                                | N                                                 |
| CC0462      | transport protein                                                                  |      | Y                        | Y                             | N                                                 |                                | Y                                                 | Middle OR Pole                 | N                                                 |
| CC0463      | Hypothetical cytosolic protein                                                     |      | Y                        | Y                             | N                                                 |                                | N                                                 |                                | N                                                 |
| CC0464      | ThreonyI-tRNA synthetase                                                           |      | Y                        | Y                             | N                                                 |                                | N                                                 |                                | N                                                 |
| CC0465      | Putative rhamnosyl transferase                                                     |      | Y                        | Y                             | N                                                 |                                | N                                                 |                                | N                                                 |
| CC0466      | Hypothetical protein                                                               |      | Y                        | Y                             | N                                                 |                                | N                                                 |                                | N                                                 |
| CC0467      | Hydroxymethylglutaryl-CoA lyase                                                    |      | Y                        | Y                             | N                                                 |                                | N                                                 |                                | N                                                 |
| CC0468      | Glucosyltransferase                                                                |      | Y                        | Y                             | N                                                 |                                | N                                                 |                                | N                                                 |
| CC0469      | Glycosyl transferase family protein                                                |      | N                        | N                             | N                                                 |                                | N                                                 |                                | N                                                 |
| CC0470      | Conserved hypothetical protein                                                     |      | Y                        | Y                             | N                                                 |                                | Y                                                 | Patchy/Spotty                  | N                                                 |
| CC0471      | 23S rRNA methyltransferase<br>Ubiquinol-cytochrome c reductase iron-sulfur subunit |      | Y                        | Y                             | N                                                 |                                | N                                                 |                                | N                                                 |
| CC0472      |                                                                                    |      | Y                        | Y                             | N                                                 |                                | N                                                 |                                | N                                                 |
| CC0473      | Cytochrome b                                                                       |      | Y                        | Y                             | N                                                 |                                | N                                                 |                                | N                                                 |
| CC0474      | Cytochrome c1                                                                      |      | Y                        | Y                             | N                                                 |                                | N                                                 |                                | N                                                 |
| CC0475      | Conserved hypothetical protein                                                     |      | Y                        | N                             | N                                                 |                                | N                                                 |                                | N                                                 |
| CC0476      | Phosphoglycerate mutase family                                                     |      | Y                        | Y                             | Y                                                 | Patchy/Spotty                  | N                                                 |                                | N                                                 |
| CC0477      | Carboxymethylenebutenolidase                                                       |      | N                        | N                             | N                                                 |                                | N                                                 |                                | N                                                 |
| CC0478      | Carboxymethylenebutenolidase<br>GTP-binding protein, probable translation factor   |      | Y                        | Y                             | N                                                 |                                | N                                                 |                                | N                                                 |
| CC0479      |                                                                                    |      | Y                        | Y                             | N                                                 |                                | N                                                 |                                | N                                                 |
| CC0480      | Hypothetical protein                                                               |      | Y                        | Y                             | N                                                 |                                | N                                                 |                                | N                                                 |
| CC0481      | Pirin                                                                              |      | Y                        | Y                             | N                                                 |                                | N                                                 |                                | N                                                 |
| CC0482      | 5-methyltetrahydropteroyltriI glutamate--<br>homocysteine methyltransferase        |      | N                        | N                             | N                                                 |                                | N                                                 |                                | N                                                 |
| CC0483      | Integral membrane protein                                                          |      | Y                        | Y                             | N                                                 |                                | N                                                 |                                | N                                                 |
| CC0484      | Peptidyl-tRNA hydrolase                                                            |      | N                        | N                             | N                                                 |                                | N                                                 |                                | N                                                 |
| CC0485      | LSU ribosomal protein L25P                                                         |      | Y                        | Y                             | N                                                 |                                | N                                                 |                                | N                                                 |
| CC0486      | Conserved hypothetical protein                                                     |      | Y                        | Y                             | Y                                                 | Patchy/Spotty                  | N                                                 |                                | N                                                 |
| CC0487      | Ribose-phosphate pyrophosphokinase                                                 |      | Y                        | Y                             | N                                                 |                                | N                                                 |                                | N                                                 |
| CC0488      | Hypothetical protein                                                               |      | Y                        | Y                             | N                                                 |                                | N                                                 |                                | N                                                 |
| CC0489      | Conserved hypothetical protein DUF497                                              |      | Y                        | Y                             | N                                                 |                                | N                                                 |                                | N                                                 |
| CC0490      | Multicopper polyphenol oxidase                                                     |      | N                        | N                             | N                                                 |                                | N                                                 |                                | N                                                 |
| CC0491      | Conserved hypothetical cytosolic protein                                           |      | N                        | N                             | N                                                 |                                | N                                                 |                                | N                                                 |
| CC0492      | Prolipoprotein diacylglyceryl transferase                                          |      | Y                        | Y                             | N                                                 |                                | N                                                 |                                | N                                                 |
| CC0493      | Hypothetical protein                                                               |      | Y                        | Y                             | N                                                 |                                | N                                                 |                                | N                                                 |
| CC0494      | Conserved hypothetical protein                                                     |      | Y                        | Y                             | N                                                 |                                | Y                                                 | Patchy/Spotty                  | N                                                 |
| CC0495      | Pyrraline-5-carboxylate reductase                                                  |      | Y                        | Y                             | Y                                                 | Pole                           | Y                                                 | Pole                           | Y                                                 |
| CC0496      | conserved hypothetical protein                                                     |      | Y                        | Y                             | N                                                 |                                | N                                                 |                                | N                                                 |
| CC0497      | LSU ribosomal protein L10P                                                         |      | Y                        | Y                             | N                                                 |                                | N                                                 |                                | N                                                 |
| CC0498      | LSU ribosomal protein L12P (L7/L12)                                                |      | Y                        | Y                             | N                                                 |                                | Y                                                 | Stalk                          | N                                                 |
| CC0499      | hypothetical protein (RDD superfamily)                                             |      | Y                        | Y                             | N                                                 |                                | N                                                 |                                | N                                                 |
| CC0500      | Secreted polysaccharide polymerase hfsI                                            | hfsI | Y                        | Y                             | N                                                 |                                | N                                                 |                                | N                                                 |
| CC0501      | Conserved hypothetical protein                                                     |      | Y                        | Y                             | N                                                 |                                | N                                                 |                                | N                                                 |
| CC0502      | hypothetical protein                                                               |      | Y                        | Y                             | N                                                 |                                | N                                                 |                                | N                                                 |
| CC0503      | DNA-directed RNA polymerase beta chain                                             |      | Y                        | N                             | N                                                 |                                | N                                                 |                                | N                                                 |
| CC0504      | DNA-directed RNA polymerase beta' chain                                            |      | Y                        | Y                             | N                                                 |                                | Y                                                 | Pole                           | N                                                 |
| CC0505      | Methyl-accepting chemotaxis protein                                                |      | N                        | N                             | N                                                 |                                | N                                                 |                                | N                                                 |
| CC0506      | Salicylate hydroxylase                                                             |      | Y                        | Y                             | N                                                 |                                | N                                                 |                                | N                                                 |
| CC0507      | Coproporphyrinogen III oxidase                                                     |      | Y                        | N                             | N                                                 |                                | N                                                 |                                | N                                                 |
| CC0508      | Hypothetical protein                                                               |      | N                        | N                             | N                                                 |                                | N                                                 |                                | N                                                 |

| Gene Number | Annotation                                                                                                             | Gene | Entry Vector Constructed | Entry Vector Sequence Correct | Localized and Sequence-verified C-terminal Fusion | Localization w/ C-terminal Tag | Localized and Sequence-verified N-terminal Fusion | Localization w/ N-terminal Tag | Protein Localized as Both N- or C-terminal Fusion |
|-------------|------------------------------------------------------------------------------------------------------------------------|------|--------------------------|-------------------------------|---------------------------------------------------|--------------------------------|---------------------------------------------------|--------------------------------|---------------------------------------------------|
| CC0509      | Hypothetical protein                                                                                                   |      | Y                        | Y                             | Y                                                 | Patchy/Spotty                  | Y                                                 | Patchy/Spotty                  | Y                                                 |
| CC0510      | Methyl-accepting chemotaxis protein                                                                                    |      | N                        | N                             | N                                                 |                                | N                                                 |                                | N                                                 |
| CC0511      | Acetyl-CoA acetyltransferase                                                                                           |      | Y                        | Y                             | N                                                 |                                | N                                                 |                                | N                                                 |
| CC0512      | Acetoacetyl-CoA reductase                                                                                              |      | Y                        | Y                             | N                                                 |                                | N                                                 |                                | N                                                 |
| CC0513      | PurR-related transcriptional regulator                                                                                 |      | Y                        | Y                             | N                                                 |                                | N                                                 |                                | N                                                 |
| CC0514      | Transposase                                                                                                            |      | N                        | N                             | N                                                 |                                | N                                                 |                                | N                                                 |
| CC0515      | Transposase                                                                                                            |      | N                        | N                             | N                                                 |                                | N                                                 |                                | N                                                 |
| CC0516      | Transcriptional regulator, LacI family                                                                                 |      | Y                        | N                             | N                                                 |                                | N                                                 |                                | N                                                 |
| CC0517      | Hypothetical protein                                                                                                   |      | Y                        | Y                             | N                                                 |                                | N                                                 |                                | N                                                 |
| CC0518      | Cupin superfamily protein                                                                                              |      | Y                        | Y                             | N                                                 |                                | N                                                 |                                | N                                                 |
| CC0519      | Hydroxyacylglutathione hydrolase                                                                                       |      | Y                        | Y                             | N                                                 |                                | N                                                 |                                | N                                                 |
| CC0520      | Methyltransferase                                                                                                      |      | Y                        | Y                             | N                                                 |                                | N                                                 |                                | N                                                 |
| CC0521      | Nitrogen regulatory protein P-II                                                                                       |      | Y                        | Y                             | N                                                 |                                | N                                                 |                                | N                                                 |
| CC0522      | Phospholipase D                                                                                                        |      | Y                        | Y                             | N                                                 |                                | N                                                 |                                | N                                                 |
| CC0523      | Endonuclease/Exonuclease/phosphatase family protein                                                                    |      | Y                        | Y                             | N                                                 |                                | N                                                 |                                | N                                                 |
| CC0524      | Methyltransferase                                                                                                      |      | Y                        | Y                             | N                                                 |                                | N                                                 |                                | N                                                 |
| CC0525      | Homoserine O-acetyltransferase                                                                                         |      | Y                        | Y                             | N                                                 |                                | N                                                 |                                | N                                                 |
| CC0526      | Phosphohistidine phosphatase sixA                                                                                      | sixA | Y                        | Y                             | N                                                 |                                | N                                                 |                                | N                                                 |
| CC0527      | Conserved hypothetical cytosolic protein                                                                               |      | Y                        | Y                             | N                                                 |                                | N                                                 |                                | N                                                 |
| CC0528      | Dihydroorotate dehydrogenase                                                                                           |      | N                        | N                             | N                                                 |                                | N                                                 |                                | N                                                 |
| CC0529      | SNARE-associated family membrane protein                                                                               |      | Y                        | Y                             | N                                                 |                                | N                                                 |                                | N                                                 |
| CC0530      | Sensory transduction protein kinase cenK                                                                               | cenK | N                        | N                             | N                                                 |                                | N                                                 |                                | N                                                 |
| CC0531      | Gamma-glutamyltranspeptidase                                                                                           |      | Y                        | Y                             | N                                                 |                                | N                                                 |                                | N                                                 |
| CC0532      | Starvation sensing protein rspA                                                                                        | rspA | Y                        | Y                             | N                                                 |                                | N                                                 |                                | N                                                 |
| CC0533      | Hypothetical protein                                                                                                   |      | Y                        | Y                             | N                                                 |                                | N                                                 |                                | N                                                 |
| CC0534      | N-acetylglucosamine-6-phosphate deacetylase                                                                            |      | Y                        | Y                             | N                                                 |                                | N                                                 |                                | N                                                 |
| CC0535      | Glucosamine-6-phosphate deaminase                                                                                      |      | Y                        | N                             | N                                                 |                                | N                                                 |                                | N                                                 |
| CC0536      | Transcriptional regulator, GntR family                                                                                 |      | Y                        | Y                             | N                                                 |                                | Y                                                 | Patchy/Spotty                  | N                                                 |
| CC0537      | Phosphoenolpyruvate-protein phosphotransferase / Phosphocarrier protein HPr / PTS system, glucose-specific IIA subunit |      | Y                        | Y                             | N                                                 |                                | N                                                 |                                | N                                                 |
| CC0538      | PTS system, N-acetylglucosamine-specific IIBC component                                                                |      | Y                        | Y                             | N                                                 |                                | N                                                 |                                | N                                                 |
| CC0539      | TonB-dependent receptor                                                                                                |      | Y                        | Y                             | N                                                 |                                | N                                                 |                                | N                                                 |
| CC0540      | Alpha-N-acetylglucosaminidase                                                                                          |      | Y                        | N                             | N                                                 |                                | N                                                 |                                | N                                                 |
| CC0541      | Hypothetical protein                                                                                                   |      | Y                        | Y                             | N                                                 |                                | N                                                 |                                | N                                                 |
| CC0542      | Oligopeptide-binding protein oppA                                                                                      | oppA | Y                        | Y                             | N                                                 |                                | N                                                 |                                | N                                                 |
| CC0543      | Hypothetical protein                                                                                                   |      | Y                        | Y                             | N                                                 |                                | N                                                 |                                | N                                                 |
| CC0544      | Conserved hypothetical protein                                                                                         |      | Y                        | N                             | N                                                 |                                | N                                                 |                                | N                                                 |
| CC0545      | Endonuclease                                                                                                           |      | Y                        | N                             | N                                                 |                                | N                                                 |                                | N                                                 |
| CC0546      | Conserved hypothetical protein                                                                                         |      | Y                        | Y                             | N                                                 |                                | N                                                 |                                | N                                                 |
| CC0547      | Conserved hypothetical protein                                                                                         |      | Y                        | Y                             | N                                                 |                                | N                                                 |                                | N                                                 |
| CC0548      | Hypothetical protein                                                                                                   |      | Y                        | N                             | N                                                 |                                | N                                                 |                                | N                                                 |
| CC0549      | Hypothetical protein                                                                                                   |      | Y                        | Y                             | N                                                 |                                | N                                                 |                                | N                                                 |
| CC0550      | Hypothetical protein                                                                                                   |      | Y                        | Y                             | Y                                                 | Patchy/Spotty                  | N                                                 |                                | N                                                 |
| CC0551      | Hypothetical protein                                                                                                   |      | Y                        | Y                             | N                                                 |                                | N                                                 |                                | N                                                 |
| CC0552      | Hypothetical response regulator receiver protein                                                                       |      | N                        | N                             | N                                                 |                                | N                                                 |                                | N                                                 |
| CC0553      | secretory tripeptidyl aminopeptidase                                                                                   |      | Y                        | Y                             | N                                                 |                                | N                                                 |                                | N                                                 |
| CC0554      | Hypothetical protein                                                                                                   |      | Y                        | Y                             | N                                                 |                                | N                                                 |                                | N                                                 |

| Gene Number | Annotation                                                              | Gene   | Entry Vector Constructed | Entry Vector Sequence Correct | Localized and Sequence-verified C-terminal Fusion | Localization w/ C-terminal Tag | Localized and Sequence-verified N-terminal Fusion | Localization w/ N-terminal Tag | Protein Localized as Both N- or C-terminal Fusion |
|-------------|-------------------------------------------------------------------------|--------|--------------------------|-------------------------------|---------------------------------------------------|--------------------------------|---------------------------------------------------|--------------------------------|---------------------------------------------------|
| CC0555      | FixC-family flavoprotein dehydrogenase                                  |        | Y                        | Y                             | N                                                 |                                | N                                                 |                                | N                                                 |
| CC0556      | Catalase                                                                |        | Y                        | Y                             | N                                                 |                                | N                                                 |                                | N                                                 |
| CC0557      | Hypothetical protein                                                    |        | Y                        | Y                             | N                                                 |                                | N                                                 |                                | N                                                 |
| CC0558      | Conserved hypothetical protein                                          |        | Y                        | Y                             | N                                                 |                                | N                                                 |                                | N                                                 |
| CC0559      | Conserved hypothetical protein                                          |        | Y                        | Y                             | N                                                 |                                | N                                                 |                                | N                                                 |
| CC0560      | FecR family protein                                                     |        | N                        | N                             | N                                                 |                                | N                                                 |                                | N                                                 |
| CC0561      | RpoE-family sigma factor                                                |        | Y                        | Y                             | N                                                 |                                | N                                                 |                                | N                                                 |
| CC0562      | TonB-dependent receptor                                                 |        | N                        | N                             | N                                                 |                                | N                                                 |                                | N                                                 |
| CC0563      | TonB-dependent receptor                                                 |        | Y                        | Y                             | N                                                 |                                | N                                                 |                                | N                                                 |
| CC0564      | Hypothetical protein                                                    |        | Y                        | N                             | N                                                 |                                | N                                                 |                                | N                                                 |
| CC0565      | Conserved hypothetical protein                                          |        | Y                        | Y                             | N                                                 |                                | N                                                 |                                | N                                                 |
| CC0566      | MoxR-like ATPases                                                       |        | N                        | N                             | N                                                 |                                | N                                                 |                                | N                                                 |
| CC0567      | Hypothetical exported protein                                           |        | Y                        | N                             | N                                                 |                                | N                                                 |                                | N                                                 |
| CC0568      | Integral membrane protein                                               |        | N                        | N                             | N                                                 |                                | N                                                 |                                | N                                                 |
| CC0569      | Hypothetical membrane spanning protein                                  |        | Y                        | Y                             | N                                                 |                                | N                                                 |                                | N                                                 |
| CC0570      | Conserved hypothetical membrane protein                                 |        | Y                        | N                             | N                                                 |                                | N                                                 |                                | N                                                 |
| CC0571      | TonB-dependent receptor                                                 |        | Y                        | Y                             | N                                                 |                                | N                                                 |                                | N                                                 |
| CC0572      | Polygalacturonase                                                       |        | Y                        | Y                             | N                                                 |                                | N                                                 |                                | N                                                 |
| CC0573      | Transcriptional repressor                                               |        | Y                        | Y                             | N                                                 |                                | N                                                 |                                | N                                                 |
| CC0574      | Hypothetical protein                                                    |        | N                        | N                             | N                                                 |                                | N                                                 |                                | N                                                 |
| CC0575      | Beta-lactamase                                                          |        | Y                        | Y                             | N                                                 |                                | N                                                 |                                | N                                                 |
| CC0576      | L-asparaginase                                                          |        | Y                        | Y                             | N                                                 |                                | N                                                 |                                | N                                                 |
| CC0577      | Cyanophycinase                                                          |        | Y                        | Y                             | N                                                 |                                | N                                                 |                                | N                                                 |
| CC0578      | Short-chain fatty acids transporter                                     |        | Y                        | N                             | N                                                 |                                | N                                                 |                                | N                                                 |
| CC0579      | TonB-dependent outer membrane receptor                                  |        | Y                        | Y                             | N                                                 |                                | N                                                 |                                | N                                                 |
| CC0580      | Transcriptional regulator                                               |        | Y                        | Y                             | N                                                 |                                | Y                                                 | Patchy/Spotty                  | N                                                 |
| CC0581      | Arginine N-succinyltransferase, beta chain                              |        | Y                        | Y                             | N                                                 |                                | N                                                 |                                | N                                                 |
| CC0582      | Succinylglutamic semialdehyde dehydrogenase                             |        | Y                        | Y                             | N                                                 |                                | N                                                 |                                | N                                                 |
| CC0583      | Succinylarginine dihydrolase                                            |        | Y                        | Y                             | N                                                 |                                | N                                                 |                                | N                                                 |
| CC0584      | Acetylmethionine aminotransferase / Succinylmethionine aminotransferase |        | Y                        | Y                             | N                                                 |                                | N                                                 |                                | N                                                 |
| CC0585      | Conserved domain hypothetical protein                                   |        | Y                        | Y                             | N                                                 |                                | N                                                 |                                | N                                                 |
| CC0586      | PAS-family sensor histidine kinase                                      |        | Y                        | Y                             | N                                                 |                                | N                                                 |                                | N                                                 |
| CC0587      | Hypothetical protein with pentapeptide repeats                          |        | Y                        | N                             | N                                                 |                                | N                                                 |                                | N                                                 |
| CC0588      | Two-component receiver domain protein                                   |        | Y                        | Y                             | N                                                 |                                | N                                                 |                                | N                                                 |
| CC0589      | Methyl-accepting chemotaxis protein                                     |        | Y                        | Y                             | Y                                                 | Pole                           | N                                                 |                                | N                                                 |
| CC0590      | Hypothetical protein                                                    |        | Y                        | Y                             | N                                                 |                                | N                                                 |                                | N                                                 |
| CC0591      | Chemotaxis protein cheY                                                 | cheY   | Y                        | Y                             | N                                                 |                                | N                                                 |                                | N                                                 |
| CC0592      | Hypothetical protein                                                    |        | Y                        | Y                             | N                                                 |                                | N                                                 |                                | N                                                 |
| CC0593      | Methyl-accepting chemotaxis protein                                     |        | Y                        | Y                             | Y                                                 | Patchy/Spotty                  | N                                                 |                                | N                                                 |
| CC0594      | chemotaxis histidine kinase protein CheAII                              | cheAII | Y                        | Y                             | N                                                 |                                | N                                                 |                                | N                                                 |
| CC0595      | Chemotaxis protein cheW                                                 | cheW   | Y                        | Y                             | Y                                                 | Variable Focus                 | N                                                 |                                | N                                                 |
| CC0596      | Chemotaxis receiver domain protein cheYII                               | cheYII | Y                        | Y                             | N                                                 |                                | N                                                 |                                | N                                                 |
| CC0597      | Receiver domain-glutamate methyltransferase                             |        |                          |                               |                                                   |                                |                                                   |                                |                                                   |
| CC0598      | cheBII                                                                  | cheBII | Y                        | Y                             | N                                                 |                                | N                                                 |                                | N                                                 |
| CC0599      | Chemotaxis protein methyltransferase                                    |        | Y                        | Y                             | N                                                 |                                | N                                                 |                                | N                                                 |
| CC0599      | Hypothetical protein                                                    |        | Y                        | Y                             | N                                                 |                                | N                                                 |                                | N                                                 |
| CC0600      | Hypothetical protein                                                    |        | Y                        | Y                             | N                                                 |                                | N                                                 |                                | N                                                 |
| CC0601      | Tetratricopeptide repeat family protein                                 |        | N                        | N                             | N                                                 |                                | N                                                 |                                | N                                                 |
| CC0602      | heme:hemopexin-binding protein                                          |        | Y                        | Y                             | N                                                 |                                | N                                                 |                                | N                                                 |
| CC0603      | heme:hemopexin-binding protein                                          |        | Y                        | Y                             | N                                                 |                                | N                                                 |                                | N                                                 |

| Gene Number | Annotation                                                                                               | Gene | Entry Vector Constructed | Entry Vector Sequence Correct | Localized and Sequence-verified C-terminal Fusion | Localization w/ C-terminal Tag | Localized and Sequence-verified N-terminal Fusion | Localization w/ N-terminal Tag | Protein Localized as Both N- or C-terminal Fusion |
|-------------|----------------------------------------------------------------------------------------------------------|------|--------------------------|-------------------------------|---------------------------------------------------|--------------------------------|---------------------------------------------------|--------------------------------|---------------------------------------------------|
| CC0604      | Hypothetical protein                                                                                     |      | Y                        | Y                             | N                                                 |                                | N                                                 |                                | N                                                 |
| CC0605      | Hypothetical protein                                                                                     |      | Y                        | N                             | N                                                 |                                | N                                                 |                                | N                                                 |
| CC0606      | Hypothetical protein                                                                                     |      | Y                        | Y                             | N                                                 |                                | N                                                 |                                | N                                                 |
| CC0607      | Hypothetical protein                                                                                     |      | Y                        | Y                             | N                                                 |                                | N                                                 |                                | N                                                 |
| CC0608      | Conserved hypothetical protein                                                                           |      | Y                        | Y                             | N                                                 |                                | N                                                 |                                | N                                                 |
| CC0609      | Nitrate binding protein nrtA                                                                             | nrtA | Y                        | Y                             | N                                                 |                                | N                                                 |                                | N                                                 |
| CC0610      | Nitrate transport permease protein nrtB                                                                  | nrtB | Y                        | N                             | N                                                 |                                | N                                                 |                                | N                                                 |
| CC0611      | Nitrate transport ATP-binding protein nrtD                                                               | nrtD | Y                        | Y                             | N                                                 |                                | N                                                 |                                | N                                                 |
| CC0612      | Nitrate response regulator NasT                                                                          | nasT | Y                        | Y                             | N                                                 |                                | N                                                 |                                | N                                                 |
| CC0613      | ABC family transporter protein                                                                           |      | N                        | N                             | N                                                 |                                | N                                                 |                                | N                                                 |
| CC0614      | Nitrate transporter                                                                                      |      | N                        | N                             | N                                                 |                                | N                                                 |                                | N                                                 |
| CC0615      | Nitrite reductase [NAD(P)H] catalytic subunit / Assimilatory nitrate reductase electron-transfer subunit |      | Y                        | Y                             | N                                                 |                                | N                                                 |                                | N                                                 |
| CC0616      | Nitrite reductase [NAD(P)H] small subunit                                                                | nasE | N                        | N                             | N                                                 |                                | N                                                 |                                | N                                                 |
| CC0617      | Assimilatory nitrate reductase catalytic subunit                                                         | nasC | N                        | N                             | N                                                 |                                | N                                                 |                                | N                                                 |
| CC0618      | Uroporphyrin-III C-methyltransferase                                                                     |      | Y                        | Y                             | N                                                 |                                | N                                                 |                                | N                                                 |
| CC0619      | Conserved hypothetical protein                                                                           |      | Y                        | Y                             | N                                                 |                                | N                                                 |                                | N                                                 |
| CC0620      | Type I restriction-modification system methylation subunit                                               |      | Y                        | Y                             | N                                                 |                                | N                                                 |                                | N                                                 |
| CC0621      | Type I restriction-modification system specificity subunit                                               |      | Y                        | Y                             | N                                                 |                                | N                                                 |                                | N                                                 |
| CC0622      | 5-methylcytosine-specific restriction enzyme MRR                                                         |      | Y                        | Y                             | N                                                 |                                | Y                                                 | MidBand                        | N                                                 |
| CC0623      | Type I restriction-modification system restriction subunit                                               |      | Y                        | Y                             | N                                                 |                                | N                                                 |                                | N                                                 |
| CC0624      | Transposase                                                                                              |      | Y                        | Y                             | N                                                 |                                | N                                                 |                                | N                                                 |
| CC0625      | Transposase                                                                                              |      | Y                        | Y                             | N                                                 |                                | N                                                 |                                | N                                                 |
| CC0626      | Hypothetical protein                                                                                     |      | Y                        | Y                             | N                                                 |                                | N                                                 |                                | N                                                 |
| CC0627      | Hypothetical protein                                                                                     |      | Y                        | Y                             | Y                                                 | Middle OR Pole                 | N                                                 |                                | N                                                 |
| CC0628      | C4-dicarboxylate transport protein                                                                       |      | Y                        | Y                             | N                                                 |                                | N                                                 |                                | N                                                 |
| CC0629      | GAF-family sensor histidine kinase                                                                       |      | Y                        | Y                             | N                                                 |                                | N                                                 |                                | N                                                 |
| CC0630      | Response regulator receiver domain                                                                       |      | Y                        | Y                             | N                                                 |                                | N                                                 |                                | N                                                 |
| CC0631      | Capsular polysaccharide biosynthesis protein                                                             |      | Y                        | Y                             | N                                                 |                                | N                                                 |                                | N                                                 |
| CC0632      | Capsular polysaccharide biosynthesis protein                                                             |      | Y                        | Y                             | N                                                 |                                | N                                                 |                                | N                                                 |
| CC0633      | Hypothetical protein                                                                                     |      | N                        | N                             | N                                                 |                                | N                                                 |                                | N                                                 |
| CC0634      | O-antigen export system ATP-binding protein                                                              |      | Y                        | N                             | N                                                 |                                | N                                                 |                                | N                                                 |
| CC0635      | Teichoic acid translocation permease protein tagG                                                        | tagG | Y                        | Y                             | Y                                                 | Patchy/Spotty                  | Y                                                 | Patchy/Spotty                  | Y                                                 |
| CC0636      | Conserved hypothetical protein                                                                           |      | Y                        | Y                             | N                                                 |                                | N                                                 |                                | N                                                 |
| CC0637      | Transcriptional regulator, AraC family                                                                   |      | Y                        | N                             | N                                                 |                                | N                                                 |                                | N                                                 |
| CC0638      | NAD(FAD)-utilizing dehydrogenases                                                                        |      | N                        | N                             | N                                                 |                                | N                                                 |                                | N                                                 |
| CC0639      | Hypothetical cytosolic protein                                                                           |      | Y                        | Y                             | N                                                 |                                | Y                                                 | Middle OR Pole                 | N                                                 |
| CC0640      | LSU ribosomal protein L1P                                                                                |      | Y                        | Y                             | N                                                 |                                | N                                                 |                                | N                                                 |
| CC0641      | LSU ribosomal protein L11P                                                                               |      | Y                        | Y                             | N                                                 |                                | N                                                 |                                | N                                                 |
| CC0642      | Transposase                                                                                              |      | Y                        | Y                             | Y                                                 | Patchy/Spotty                  | N                                                 |                                | N                                                 |
| CC0643      | 2-hydroxychromene-2-carboxylate isomerase                                                                |      | Y                        | Y                             | N                                                 |                                | N                                                 |                                | N                                                 |
| CC0644      | Short chain dehydrogenase                                                                                |      | Y                        | Y                             | N                                                 |                                | N                                                 |                                | N                                                 |
| CC0645      | Transcriptional regulator, MarR family                                                                   |      | Y                        | N                             | N                                                 |                                | N                                                 |                                | N                                                 |
| CC0646      | Hypothetical protein                                                                                     |      | Y                        | Y                             | N                                                 |                                | N                                                 |                                | N                                                 |
| CC0647      | Transcriptional activator chrR                                                                           |      | N                        | N                             | N                                                 |                                | N                                                 |                                | N                                                 |
| CC0648      | RNA polymerase sigma factor                                                                              |      | Y                        | Y                             | N                                                 |                                | N                                                 |                                | N                                                 |

| Gene Number | Annotation                                                                                                                            | Gene | Entry Vector Constructed | Entry Vector Sequence Correct | Localized and Sequence-verified C-terminal Fusion | Localization w/ C-terminal Tag | Localized and Sequence-verified N-terminal Fusion | Localization w/ N-terminal Tag | Protein Localized as Both N- or C-terminal Fusion |
|-------------|---------------------------------------------------------------------------------------------------------------------------------------|------|--------------------------|-------------------------------|---------------------------------------------------|--------------------------------|---------------------------------------------------|--------------------------------|---------------------------------------------------|
| CC0649      | Peptidase family S41 protein                                                                                                          |      | Y                        | Y                             | N                                                 |                                | N                                                 |                                | N                                                 |
| CC0650      | Conserved hypothetical protein                                                                                                        |      | Y                        | Y                             | N                                                 |                                | N                                                 |                                | N                                                 |
| CC0651      | Conserved hypothetical protein                                                                                                        |      | Y                        | Y                             | N                                                 |                                | N                                                 |                                | N                                                 |
| CC0652      | PAS-family hybrid histidine kinase/receiver protein                                                                                   |      | N                        | N                             | N                                                 |                                | N                                                 |                                | N                                                 |
| CC0653      | CarD-like transcriptional regulator                                                                                                   |      | Y                        | Y                             | N                                                 |                                | N                                                 |                                | N                                                 |
| CC0654      | Ferredoxin                                                                                                                            |      | Y                        | Y                             | N                                                 |                                | N                                                 |                                | N                                                 |
| CC0655      | PAS-family GGDEF/EAL protein                                                                                                          |      | Y                        | Y                             | N                                                 |                                | N                                                 |                                | N                                                 |
| CC0656      | Heat shock protein 15                                                                                                                 |      | N                        | N                             | N                                                 |                                | N                                                 |                                | N                                                 |
| CC0657      | ATP-dependent DNA helicase                                                                                                            |      | N                        | N                             | N                                                 |                                | N                                                 |                                | N                                                 |
| CC0658      | Metal-dependent hydrolase                                                                                                             |      | Y                        | N                             | N                                                 |                                | N                                                 |                                | N                                                 |
| CC0659      | O6-methylguanine-DNA methyltransferase                                                                                                |      | Y                        | Y                             | Y                                                 | Middle OR Pole                 | N                                                 |                                | N                                                 |
| CC0660      | Hypothetical protein                                                                                                                  |      | Y                        | N                             | N                                                 |                                | N                                                 |                                | N                                                 |
| CC0661      | LSU ribosomal protein L28P                                                                                                            |      | Y                        | Y                             | N                                                 |                                | N                                                 |                                | N                                                 |
| CC0662      |                                                                                                                                       |      | Y                        | Y                             | N                                                 |                                | N                                                 |                                | N                                                 |
| CC0663      | Ferrichrome receptor fcuA                                                                                                             | fcuA | Y                        | Y                             | N                                                 |                                | N                                                 |                                | N                                                 |
| CC0664      |                                                                                                                                       |      | Y                        | Y                             | N                                                 |                                | N                                                 |                                | N                                                 |
| CC0665      | Cold shock protein                                                                                                                    |      | N                        | N                             | N                                                 |                                | N                                                 |                                | N                                                 |
| CC0666      | Hypothetical protein                                                                                                                  |      | Y                        | Y                             | N                                                 |                                | N                                                 |                                | N                                                 |
| CC0667      | Hypothetical protein                                                                                                                  |      | Y                        | N                             | N                                                 |                                | N                                                 |                                | N                                                 |
| CC0668      | Hypothetical protein                                                                                                                  |      | Y                        | Y                             | N                                                 |                                | N                                                 |                                | N                                                 |
| CC0669      | Hypothetical protein                                                                                                                  |      | Y                        | Y                             | N                                                 |                                | N                                                 |                                | N                                                 |
| CC0670      | Hypothetical protein                                                                                                                  |      | Y                        | Y                             | N                                                 |                                | N                                                 |                                | N                                                 |
| CC0671      | Hypothetical membrane associated protein                                                                                              |      | Y                        | N                             | N                                                 |                                | N                                                 |                                | N                                                 |
| CC0672      | Cobaltochelataze cobT subunit                                                                                                         |      | Y                        | Y                             | N                                                 |                                | N                                                 |                                | N                                                 |
| CC0673      | Hypothetical protein                                                                                                                  |      | Y                        | Y                             | N                                                 |                                | N                                                 |                                | N                                                 |
| CC0674      | Conserved hypothetical protein                                                                                                        |      | N                        | N                             | N                                                 |                                | N                                                 |                                | N                                                 |
| CC0675      | Conserved hypothetical protein                                                                                                        |      | Y                        | N                             | N                                                 |                                | N                                                 |                                | N                                                 |
| CC0676      | Hypothetical protein                                                                                                                  |      | Y                        | Y                             | N                                                 |                                | N                                                 |                                | N                                                 |
| CC0677      | Hypothetical protein                                                                                                                  |      | N                        | N                             | N                                                 |                                | N                                                 |                                | N                                                 |
| CC0678      | Hypothetical protein                                                                                                                  |      | Y                        | Y                             | N                                                 |                                | N                                                 |                                | N                                                 |
| CC0679      | abortive infection protein                                                                                                            |      | Y                        | Y                             | N                                                 |                                | N                                                 |                                | N                                                 |
| CC0680      | Hypothetical protein                                                                                                                  |      | Y                        | Y                             | N                                                 |                                | N                                                 |                                | N                                                 |
| CC0681      |                                                                                                                                       |      | Y                        | Y                             | N                                                 |                                | N                                                 |                                | N                                                 |
| CC0682      |                                                                                                                                       |      | Y                        | Y                             | N                                                 |                                | N                                                 |                                | N                                                 |
| CC0683      | Type I secretion adaptor protein hlyD                                                                                                 | hlyD | Y                        | N                             | N                                                 |                                | N                                                 |                                | N                                                 |
| CC0684      | Type I protein secretion ATP-binding protein / Type I protein secretion transmembrane subunit / Type I secretion processing peptidase |      | Y                        | Y                             | N                                                 |                                | N                                                 |                                | N                                                 |
| CC0685      | chaperonin GroEL                                                                                                                      |      | Y                        | Y                             | N                                                 |                                | N                                                 |                                | N                                                 |
| CC0686      | chaperonin GroES                                                                                                                      |      | N                        | N                             | N                                                 |                                | N                                                 |                                | N                                                 |
| CC0687      | Glyoxalase family protein                                                                                                             |      | Y                        | Y                             | N                                                 |                                | N                                                 |                                | N                                                 |
| CC0688      | Hypothetical protein                                                                                                                  |      | Y                        | Y                             | N                                                 |                                | N                                                 |                                | N                                                 |
| CC0689      | O6-methylguanine-DNA methyltransferase                                                                                                |      | Y                        | Y                             | N                                                 |                                | N                                                 |                                | N                                                 |
| CC0690      | Acyl-CoA dehydrogenase                                                                                                                |      | Y                        | Y                             | N                                                 |                                | N                                                 |                                | N                                                 |
| CC0691      | Ribosomal-protein-alanine acetyltransferase                                                                                           |      | Y                        | Y                             | N                                                 |                                | N                                                 |                                | N                                                 |
| CC0692      | Hypothetical protein                                                                                                                  |      | Y                        | Y                             | N                                                 |                                | N                                                 |                                | N                                                 |
| CC0693      | Hypothetical protein                                                                                                                  |      | Y                        | N                             | N                                                 |                                | N                                                 |                                | N                                                 |
| CC0694      | Transcriptional regulator skgA                                                                                                        | skgA | Y                        | Y                             | N                                                 |                                | N                                                 |                                | N                                                 |
| CC0695      | DNA mismatch repair protein mutL                                                                                                      | mutL | Y                        | Y                             | N                                                 |                                | N                                                 |                                | N                                                 |
| CC0696      | GumN superfamily protein                                                                                                              |      | Y                        | Y                             | N                                                 |                                | N                                                 |                                | N                                                 |
| CC0697      | GumN superfamily protein                                                                                                              |      | N                        | N                             | N                                                 |                                | N                                                 |                                | N                                                 |

| Gene Number | Annotation                                                      | Gene | Entry Vector Constructed | Entry Vector Sequence Correct | Localized and Sequence-verified C-terminal Fusion | Localization w/ C-terminal Tag | Localized and Sequence-verified N-terminal Fusion | Localization w/ N-terminal Tag | Protein Localized as Both N- or C-terminal Fusion |
|-------------|-----------------------------------------------------------------|------|--------------------------|-------------------------------|---------------------------------------------------|--------------------------------|---------------------------------------------------|--------------------------------|---------------------------------------------------|
| CC0698      | GumN superfamily protein                                        |      | Y                        | Y                             | N                                                 |                                | N                                                 |                                | N                                                 |
| CC0699      | Conserved hypothetical protein                                  |      | Y                        | Y                             | N                                                 |                                | N                                                 |                                | N                                                 |
| CC0700      | Lipoprotein signal peptidase                                    |      | Y                        | Y                             | N                                                 |                                | N                                                 |                                | N                                                 |
| CC0701      | Isoleucyl-tRNA synthetase                                       |      | N                        | N                             | N                                                 |                                | N                                                 |                                | N                                                 |
| CC0702      | Endopeptidase degP                                              | degP | Y                        | Y                             | N                                                 |                                | N                                                 |                                | N                                                 |
| CC0703      | Riboflavin kinase / FMN adenyltransferase                       |      | N                        | N                             | N                                                 |                                | N                                                 |                                | N                                                 |
| CC0704      | 3-hydroxybutyryl-CoA dehydratase                                |      | Y                        | Y                             | N                                                 |                                | N                                                 |                                | N                                                 |
| CC0705      | Hydrolase (HAD superfamily)                                     |      | N                        | N                             | N                                                 |                                | N                                                 |                                | N                                                 |
| CC0706      | NnrU                                                            |      | Y                        | Y                             | N                                                 |                                | N                                                 |                                | N                                                 |
| CC0707      | Hypothetical cytosolic protein                                  |      | Y                        | N                             | N                                                 |                                | N                                                 |                                | N                                                 |
| CC0708      | alkB protein                                                    |      | Y                        | Y                             | N                                                 |                                | N                                                 |                                | N                                                 |
| CC0709      | ADA regulatory protein / O6-methylguanine-DNA methyltransferase |      | Y                        | N                             | N                                                 |                                | N                                                 |                                | N                                                 |
| CC0710      |                                                                 |      | N                        | N                             | N                                                 |                                | N                                                 |                                | N                                                 |
| CC0711      | Ferrous iron transport protein A                                |      | Y                        | Y                             | N                                                 |                                | N                                                 |                                | N                                                 |
| CC0712      | Ferrous iron transport protein B                                |      | Y                        | Y                             | N                                                 |                                | N                                                 |                                | N                                                 |
| CC0713      | Transcriptional regulator                                       |      | N                        | N                             | N                                                 |                                | N                                                 |                                | N                                                 |
| CC0714      | Hypothetical membrane spanning protein                          |      | Y                        | N                             | N                                                 |                                | N                                                 |                                | N                                                 |
| CC0715      | 3-hydroxybutyryl-CoA dehydrogenase                              |      | Y                        | Y                             | N                                                 |                                | N                                                 |                                | N                                                 |
| CC0716      | Lysien 2,3-aminomutase                                          |      | Y                        | Y                             | N                                                 |                                | N                                                 |                                | N                                                 |
| CC0717      | Hypothetical membrane associated protein                        |      | Y                        | Y                             | N                                                 |                                | N                                                 |                                | N                                                 |
| CC0718      | Tellurium resistance protein terB                               | terB | Y                        | Y                             | N                                                 |                                | N                                                 |                                | N                                                 |
| CC0719      | Hypothetical protein                                            |      | Y                        | Y                             | N                                                 |                                | N                                                 |                                | N                                                 |
| CC0720      | Lysyl-tRNA synthetase                                           |      | Y                        | Y                             | N                                                 |                                | N                                                 |                                | N                                                 |
| CC0721      | Protein Translation Elongation Factor P (EF-P)                  |      | Y                        | Y                             | N                                                 |                                | N                                                 |                                | N                                                 |
| CC0722      | TonB-dependent receptor                                         |      | Y                        | Y                             | N                                                 |                                | N                                                 |                                | N                                                 |
| CC0723      | Two component sensor histidine kinase                           |      | Y                        | Y                             | Y                                                 | Patchy/Spotty                  | N                                                 |                                | N                                                 |
| CC0724      |                                                                 |      | Y                        | Y                             | N                                                 |                                | N                                                 |                                | N                                                 |
| CC0725      | Hypothetical protein                                            |      | Y                        | Y                             | N                                                 |                                | N                                                 |                                | N                                                 |
| CC0726      | Electron transfer flavoprotein alpha-subunit                    |      | Y                        | N                             | N                                                 |                                | N                                                 |                                | N                                                 |
| CC0727      | Electron transfer flavoprotein beta-subunit                     |      | Y                        | Y                             | N                                                 |                                | N                                                 |                                | N                                                 |
| CC0728      | Hypothetical protein                                            |      | Y                        | Y                             | N                                                 |                                | N                                                 |                                | N                                                 |
| CC0729      | Cobalamin adenosyltransferase family protein                    |      | Y                        | Y                             | N                                                 |                                | N                                                 |                                | N                                                 |
| CC0730      | Conserved hypothetical protein                                  |      | N                        | N                             | N                                                 |                                | N                                                 |                                | N                                                 |
| CC0731      | Hypothetical protein                                            |      | Y                        | Y                             | N                                                 |                                | N                                                 |                                | N                                                 |
| CC0732      | Transcriptional regulator, TetR family                          |      | Y                        | Y                             | N                                                 |                                | N                                                 |                                | N                                                 |
| CC0733      | Transcriptional regulator, TetR family                          |      | Y                        | Y                             | N                                                 |                                | Y                                                 | Patchy/Spotty                  | N                                                 |
| CC0734      | Hypothetical protein                                            |      | Y                        | N                             | N                                                 |                                | N                                                 |                                | N                                                 |
| CC0735      | Hypothetical protein                                            |      | Y                        | Y                             | N                                                 |                                | N                                                 |                                | N                                                 |
| CC0736      | Carboxypeptidase S                                              |      | N                        | N                             | N                                                 |                                | N                                                 |                                | N                                                 |
| CC0737      | 3-chlorobenzoate-3,4-dioxygenase oxygenase subunit              |      | N                        | N                             | N                                                 |                                | N                                                 |                                | N                                                 |
| CC0738      | Aspartate aminotransferase                                      |      | Y                        | N                             | N                                                 |                                | N                                                 |                                | N                                                 |
| CC0739      | OAR protein precursor                                           |      | N                        | N                             | N                                                 |                                | N                                                 |                                | N                                                 |
| CC0740      | PAS family GGDEF/EAL protein                                    |      | Y                        | Y                             | N                                                 |                                | N                                                 |                                | N                                                 |
| CC0741      | GTP-binding protein TypA/BipA                                   |      | Y                        | Y                             | N                                                 |                                | N                                                 |                                | N                                                 |
| CC0742      | Hypothetical protein                                            |      | Y                        | Y                             | N                                                 |                                | N                                                 |                                | N                                                 |
| CC0743      | N-formylglutamate deformylase                                   |      | Y                        | Y                             | N                                                 |                                | N                                                 |                                | N                                                 |
| CC0744      | Two-component receiver protein cpdR                             | cpdR | Y                        | Y                             | N                                                 |                                | Y                                                 | Pole                           | N                                                 |
| CC0745      | Aminobenzoyl-glutamate transport protein                        |      | Y                        | Y                             | N                                                 |                                | N                                                 |                                | N                                                 |
| CC0746      | Secreted protease precursor sapA                                | sapA | Y                        | Y                             | N                                                 |                                | N                                                 |                                | N                                                 |



| Gene Number | Annotation                                                                                                                           | Gene | Entry Vector Constructed | Entry Vector Sequence Correct | Localized and Sequence-verified C-terminal Fusion | Localization w/ C-terminal Tag | Localized and Sequence-verified N-terminal Fusion | Localization w/ N-terminal Tag | Protein Localized as Both N- or C-terminal Fusion |
|-------------|--------------------------------------------------------------------------------------------------------------------------------------|------|--------------------------|-------------------------------|---------------------------------------------------|--------------------------------|---------------------------------------------------|--------------------------------|---------------------------------------------------|
| CC0747      | Heat resistant agglutinin tRNA (5-aminomethyl-2-thiouridylate) methyltransferase / tRNA (5-carboxymethylaminomethyl-2-thiouridylate) |      | N                        | N                             | N                                                 |                                | N                                                 |                                | N                                                 |
| CC0748      | oxidase TrmC                                                                                                                         |      | Y                        | Y                             | N                                                 |                                | N                                                 |                                | N                                                 |
| CC0749      | Hypothetical protein                                                                                                                 |      | N                        | N                             | N                                                 |                                | N                                                 |                                | N                                                 |
| CC0750      | Chemotaxis motA protein                                                                                                              | motA | Y                        | Y                             | N                                                 |                                | N                                                 |                                | N                                                 |
| CC0751      | Transporter, MFS superfamily                                                                                                         |      | Y                        | N                             | N                                                 |                                | N                                                 |                                | N                                                 |
| CC0752      | Hypoxia transcriptional regulator fixK                                                                                               | fixK | Y                        | Y                             | N                                                 |                                | N                                                 |                                | N                                                 |
| CC0753      | hypoxia negative feedback regulator fixT                                                                                             | fixT | Y                        | Y                             | N                                                 |                                | N                                                 |                                | N                                                 |
| CC0754      | Hypothetical protein                                                                                                                 |      | Y                        | Y                             | N                                                 |                                | N                                                 |                                | N                                                 |
| CC0755      | Glycosyltransferase                                                                                                                  |      | N                        | N                             | N                                                 |                                | N                                                 |                                | N                                                 |
| CC0756      | Phosphatidylglycerol glycosyltransferase                                                                                             |      | Y                        | Y                             | N                                                 |                                | N                                                 |                                | N                                                 |
| CC0757      | Conserved membrane spanning protein                                                                                                  |      | N                        | N                             | N                                                 |                                | N                                                 |                                | N                                                 |
| CC0758      | Two-component response regulator fixJ                                                                                                | fixJ | Y                        | Y                             | N                                                 |                                | N                                                 |                                | N                                                 |
| CC0759      | Oxygen sensory histidine kinase fixL                                                                                                 | fixL | Y                        | Y                             | N                                                 |                                | N                                                 |                                | N                                                 |
| CC0760      | ABC transporter, ATP-binding protein cydC                                                                                            | cydC | Y                        | Y                             | N                                                 |                                | N                                                 |                                | N                                                 |
| CC0761      | ABC transporter, ATP-binding protein cydD                                                                                            | cydD | Y                        | N                             | N                                                 |                                | N                                                 |                                | N                                                 |
| CC0762      | Cytochrome bd-type quinol oxidase, subunit 1 cydA                                                                                    | cydA | Y                        | Y                             | N                                                 |                                | N                                                 |                                | N                                                 |
| CC0763      | Cytochrome bd-type quinol oxidase, subunit 2 cydB                                                                                    | cydB | N                        | N                             | N                                                 |                                | N                                                 |                                | N                                                 |
| CC0764      | Chemotaxis protein cheW                                                                                                              |      | Y                        | Y                             | Y                                                 | Pole                           | Y                                                 | Middle OR Pole                 | Y                                                 |
| CC0765      | Hypothetical protein                                                                                                                 |      | Y                        | Y                             | N                                                 |                                | N                                                 |                                | N                                                 |
| CC0766      | GTP-binding protein YihA                                                                                                             | YihA | Y                        | Y                             | N                                                 |                                | N                                                 |                                | N                                                 |
| CC0767      | Inner membrane protein translocase component yidC                                                                                    | yidC | Y                        | Y                             | N                                                 |                                | N                                                 |                                | N                                                 |
| CC0768      | Ribonuclease P protein component                                                                                                     |      | Y                        | Y                             | N                                                 |                                | N                                                 |                                | N                                                 |
| CC0769      | LSU ribosomal protein L34P                                                                                                           |      | Y                        | Y                             | N                                                 |                                | N                                                 |                                | N                                                 |
| CC0770      | Quinone oxidoreductase                                                                                                               |      | N                        | N                             | N                                                 |                                | N                                                 |                                | N                                                 |
| CC0771      | Acetyl esterase                                                                                                                      |      | Y                        | Y                             | N                                                 |                                | N                                                 |                                | N                                                 |
| CC0772      | Transcriptional regulator, TetR family                                                                                               |      | Y                        | Y                             | N                                                 |                                | N                                                 |                                | N                                                 |
| CC0773      | Hypothetical cytosolic protein                                                                                                       |      | Y                        | N                             | N                                                 |                                | N                                                 |                                | N                                                 |
| CC0774      | Dimethylaniline monooxygenase [N-oxide forming]                                                                                      |      | Y                        | Y                             | N                                                 |                                | N                                                 |                                | N                                                 |
| CC0775      | Hypothetical protein                                                                                                                 |      | N                        | N                             | N                                                 |                                | N                                                 |                                | N                                                 |
| CC0776      | Lignostilbene-alpha,beta-dioxygenase                                                                                                 |      | Y                        | Y                             | N                                                 |                                | N                                                 |                                | N                                                 |
| CC0777      | L-sorbose dehydrogenase [FAD]                                                                                                        |      | Y                        | Y                             | N                                                 |                                | N                                                 |                                | N                                                 |
| CC0778      | Glutathione S-transferase                                                                                                            |      | N                        | N                             | N                                                 |                                | N                                                 |                                | N                                                 |
| CC0779      | 3-ketoacyl-CoA thiolase                                                                                                              |      | Y                        | Y                             | N                                                 |                                | N                                                 |                                | N                                                 |
| CC0780      | Hypothetical protein                                                                                                                 |      | Y                        | Y                             | N                                                 |                                | N                                                 |                                | N                                                 |
| CC0781      | Hypothetical protein                                                                                                                 |      | Y                        | N                             | N                                                 |                                | N                                                 |                                | N                                                 |
| CC0782      | Hypothetical protein                                                                                                                 |      | Y                        | Y                             | N                                                 |                                | N                                                 |                                | N                                                 |
| CC0783      | Galactonate operon transcriptional repressor                                                                                         |      | N                        | N                             | N                                                 |                                | N                                                 |                                | N                                                 |
| CC0784      | 2-dehydro-3-deoxy-6-phosphogalactonate aldolase                                                                                      |      | Y                        | Y                             | N                                                 |                                | Y                                                 | Pole                           | N                                                 |
| CC0785      | 2-dehydro-3-deoxygalactonokinase                                                                                                     |      | Y                        | Y                             | N                                                 |                                | N                                                 |                                | N                                                 |
| CC0786      |                                                                                                                                      |      | N                        | N                             | N                                                 |                                | N                                                 |                                | N                                                 |
| CC0787      | Tryptophan halogenase                                                                                                                |      | Y                        | Y                             | N                                                 |                                | N                                                 |                                | N                                                 |
| CC0788      | Beta-galactosidase                                                                                                                   |      | Y                        | Y                             | N                                                 |                                | N                                                 |                                | N                                                 |
| CC0789      | Alpha-glucosidase                                                                                                                    |      | N                        | N                             | N                                                 |                                | N                                                 |                                | N                                                 |
| CC0790      | Transcriptional regulators, LysR family                                                                                              |      | Y                        | Y                             | N                                                 |                                | N                                                 |                                | N                                                 |
| CC0791      | Trp repressor binding protein                                                                                                        |      | Y                        | Y                             | N                                                 |                                | N                                                 |                                | N                                                 |

| Gene Number | Annotation                                                            | Gene   | Entry Vector Constructed | Entry Vector Sequence Correct | Localized and Sequence-verified C-terminal Fusion | Localization w/ C-terminal Tag | Localized and Sequence-verified N-terminal Fusion | Localization w/ N-terminal Tag | Protein Localized as Both N- or C-terminal Fusion |
|-------------|-----------------------------------------------------------------------|--------|--------------------------|-------------------------------|---------------------------------------------------|--------------------------------|---------------------------------------------------|--------------------------------|---------------------------------------------------|
| CC0792      | Flagellin                                                             |        | Y                        | Y                             | N                                                 |                                | N                                                 |                                | N                                                 |
| CC0793      | Flagellin                                                             |        | Y                        | Y                             | N                                                 |                                | N                                                 |                                | N                                                 |
| CC0794      | Flagellin                                                             |        | Y                        | Y                             | N                                                 |                                | N                                                 |                                | N                                                 |
| CC0795      | Alpha-L-fucosidase                                                    |        | Y                        | Y                             | N                                                 |                                | N                                                 |                                | N                                                 |
| CC0796      | Alpha-glucosidase                                                     |        | N                        | N                             | N                                                 |                                | N                                                 |                                | N                                                 |
| CC0797      | Glucan 1,4-beta-glucosidase                                           |        | Y                        | Y                             | N                                                 |                                | N                                                 |                                | N                                                 |
| CC0798      | Sialic acid-specific 9-O-acetyltransferase                            |        | Y                        | Y                             | N                                                 |                                | N                                                 |                                | N                                                 |
| CC0799      | Para-nitrobenzyl esterase                                             |        | Y                        | N                             | N                                                 |                                | N                                                 |                                | N                                                 |
| CC0800      | Hypothetical protein                                                  |        | Y                        | Y                             | N                                                 |                                | N                                                 |                                | N                                                 |
| CC0801      | Mannanase precursor frameshift                                        |        | N                        | N                             | N                                                 |                                | N                                                 |                                | N                                                 |
| CC0802      | toxin protein relE-1                                                  | relE-1 | Y                        | Y                             | N                                                 |                                | N                                                 |                                | N                                                 |
| CC0803      | antitoxin protein relB-1                                              | relB-1 | Y                        | N                             | N                                                 |                                | N                                                 |                                | N                                                 |
| CC0804      | Proline dehydrogenase / Delta-1-pyrroline-5-carboxylate dehydrogenase |        | N                        | N                             | N                                                 |                                | N                                                 |                                | N                                                 |
| CC0805      | Leucine-responsive regulatory protein                                 |        | Y                        | Y                             | N                                                 |                                | N                                                 |                                | N                                                 |
| CC0806      | Outer membrane efflux protein                                         |        | Y                        | Y                             | Y                                                 | Patchy/Spotty                  | N                                                 |                                | N                                                 |
| CC0807      | Cation/multidrug efflux pump acrB2                                    | acrB2  | N                        | N                             | N                                                 |                                | N                                                 |                                | N                                                 |
| CC0808      | Periplasmic multidrug efflux lipoprotein precursor                    |        | N                        | N                             | N                                                 |                                | N                                                 |                                | N                                                 |
| CC0809      | Transcriptional regulator                                             |        | Y                        | N                             | N                                                 |                                | N                                                 |                                | N                                                 |
| CC0810      | 3-isopropylmalate dehydrogenase                                       |        | Y                        | Y                             | N                                                 |                                | N                                                 |                                | N                                                 |
| CC0811      | Metallo-beta-lactamase protein                                        |        | N                        | N                             | N                                                 |                                | N                                                 |                                | N                                                 |
| CC0812      | Rhamnogalacturonan acetyltransferase                                  |        | Y                        | Y                             | Y                                                 | Patchy/Spotty                  | N                                                 |                                | N                                                 |
| CC0813      | Beta-xylosidase                                                       |        | Y                        | Y                             | N                                                 |                                | N                                                 |                                | N                                                 |
| CC0814      | Glucose/fructose transport protein                                    |        | Y                        | Y                             | N                                                 |                                | N                                                 |                                | N                                                 |
| CC0815      | TonB-dependent receptor                                               |        | Y                        | Y                             | N                                                 |                                | N                                                 |                                | N                                                 |
| CC0816      | acetyltransferase, GNAT family                                        |        | N                        | N                             | N                                                 |                                | N                                                 |                                | N                                                 |
| CC0817      | Hypothetical protein                                                  |        | Y                        | Y                             | N                                                 |                                | N                                                 |                                | N                                                 |
| CC0818      | Hypothetical protein                                                  |        | Y                        | Y                             | N                                                 |                                | N                                                 |                                | N                                                 |
| CC0819      | xylonate dehydratase xylD                                             | xylD   | Y                        | Y                             | N                                                 |                                | N                                                 |                                | N                                                 |
| CC0820      | xylonolactonase xylC                                                  | xylC   | Y                        | Y                             | N                                                 |                                | N                                                 |                                | N                                                 |
| CC0821      | xylose dehydrogenase xylB                                             | xylB   | Y                        | Y                             | N                                                 |                                | N                                                 |                                | N                                                 |
| CC0822      | alpha-ketoglutaric semialdehyde dehydrogenase xylA                    | xylA   | Y                        | Y                             | N                                                 |                                | N                                                 |                                | N                                                 |
| CC0823      | 2-hydroxyhepta-2,4-diene-1,7-dioate isomerase                         |        | N                        | N                             | N                                                 |                                | N                                                 |                                | N                                                 |
| CC0824      | Hypothetical protein                                                  |        | Y                        | Y                             | N                                                 |                                | N                                                 |                                | N                                                 |
| CC0825      | Hypothetical protein                                                  |        | N                        | N                             | N                                                 |                                | N                                                 |                                | N                                                 |
| CC0826      | DNA modification methyltransferase-related protein                    |        | N                        | N                             | N                                                 |                                | N                                                 |                                | N                                                 |
| CC0827      | Hypothetical cytosolic protein                                        |        | Y                        | Y                             | N                                                 |                                | N                                                 |                                | N                                                 |
| CC0828      | Carbon-nitrogen hydrolase family protein                              |        | Y                        | Y                             | N                                                 |                                | N                                                 |                                | N                                                 |
| CC0829      | Glutaredoxin                                                          |        | Y                        | Y                             | N                                                 |                                | N                                                 |                                | N                                                 |
| CC0830      | Amidophosphoribosyltransferase family protein                         |        | Y                        | Y                             | N                                                 |                                | N                                                 |                                | N                                                 |
| CC0831      | Biotin synthesis protein bioC                                         | bioC   | Y                        | Y                             | N                                                 |                                | N                                                 |                                | N                                                 |
| CC0832      | FliP/FliN pilin component protein                                     |        | Y                        | Y                             | N                                                 |                                | N                                                 |                                | N                                                 |
| CC0833      | 7,8-dihydro-8-oxoguanine-triphosphatase                               |        | Y                        | Y                             | N                                                 |                                | N                                                 |                                | N                                                 |
| CC0834      | Hypothetical protein                                                  |        | Y                        | Y                             | N                                                 |                                | N                                                 |                                | N                                                 |
| CC0835      | ATP-dependent RNA helicase                                            |        | N                        | N                             | N                                                 |                                | N                                                 |                                | N                                                 |
| CC0836      | PAS-family sensor histidine kinase                                    |        | Y                        | Y                             | N                                                 |                                | N                                                 |                                | N                                                 |
| CC0837      | Conserved hypothetical protein                                        |        | Y                        | Y                             | N                                                 |                                | N                                                 |                                | N                                                 |
| CC0838      | ABC transporter ATP-binding protein                                   |        | Y                        | Y                             | N                                                 |                                | N                                                 |                                | N                                                 |

| Gene Number | Annotation                                                                                  | Gene   | Entry Vector Constructed | Entry Vector Sequence Correct | Localized and Sequence-verified C-terminal Fusion | Localization w/ C-terminal Tag | Localized and Sequence-verified N-terminal Fusion | Localization w/ N-terminal Tag | Protein Localized as Both N- or C-terminal Fusion |
|-------------|---------------------------------------------------------------------------------------------|--------|--------------------------|-------------------------------|---------------------------------------------------|--------------------------------|---------------------------------------------------|--------------------------------|---------------------------------------------------|
| CC0839      | Hypothetical protein                                                                        |        | N                        | N                             | N                                                 |                                | N                                                 |                                | N                                                 |
| CC0840      | 3-demethylubiquinone 3-methyltransferase                                                    |        | Y                        | Y                             | N                                                 |                                | N                                                 |                                | N                                                 |
| CC0841      | Hypothetical protein                                                                        |        | Y                        | Y                             | N                                                 |                                | N                                                 |                                | N                                                 |
| CC0842      | Hypothetical protein                                                                        |        | Y                        | Y                             | N                                                 |                                | N                                                 |                                | N                                                 |
| CC0843      | Aspartokinase                                                                               |        | Y                        | Y                             | N                                                 |                                | N                                                 |                                | N                                                 |
| CC0844      | Hypothetical protein                                                                        |        | Y                        | Y                             | N                                                 |                                | N                                                 |                                | N                                                 |
| CC0845      | Conserved hypothetical protein                                                              |        | Y                        | Y                             | N                                                 |                                | N                                                 |                                | N                                                 |
| CC0846      | Conserved hypothetical protein                                                              |        | Y                        | Y                             | Y                                                 | Patchy/Spotty                  | Y                                                 | Patchy/Spotty                  | Y                                                 |
| CC0847      | Poly(3-hydroxyalkanoate) depolymerase                                                       |        | N                        | N                             | N                                                 |                                | N                                                 |                                | N                                                 |
| CC0848      | Transporter, drug/metabolite exporter family Phosphoenolpyruvate-protein phosphotransferase |        | N                        | N                             | N                                                 |                                | N                                                 |                                | N                                                 |
| CC0849      | Hypothetical transcriptional regulatory protein                                             |        | Y                        | Y                             | N                                                 |                                | N                                                 |                                | N                                                 |
| CC0850      | 1-hydroxy-2-methyl-2-(E)-butenyl 4-diphosphate synthase                                     |        | Y                        | Y                             | N                                                 |                                | N                                                 |                                | N                                                 |
| CC0851      | Conserved hypothetical protein                                                              |        | Y                        | Y                             | N                                                 |                                | N                                                 |                                | N                                                 |
| CC0852      | Conserved hypothetical protein                                                              |        | Y                        | N                             | N                                                 |                                | N                                                 |                                | N                                                 |
| CC0853      | Hypothetical protein                                                                        |        | Y                        | Y                             | N                                                 |                                | N                                                 |                                | N                                                 |
| CC0854      | Ribosomal large subunit pseudouridine synthase F                                            |        | Y                        | Y                             | N                                                 |                                | N                                                 |                                | N                                                 |
| CC0855      | Bacterial Peptide Chain Release Factor 1 (RF-1)                                             |        | Y                        | Y                             | N                                                 |                                | N                                                 |                                | N                                                 |
| CC0856      | CHASE4-family GGDEF/EAL protein                                                             |        | Y                        | N                             | N                                                 |                                | N                                                 |                                | N                                                 |
| CC0857      | Conserved hypothetical protein                                                              |        | Y                        | Y                             | N                                                 |                                | N                                                 |                                | N                                                 |
| CC0858      | inositol ABC transporter, periplasmic inositol-binding protein ibpA                         | ibpA   | Y                        | Y                             | N                                                 |                                | N                                                 |                                | N                                                 |
| CC0859      | inositol transport ATP-binding protein iatA                                                 | iatA   | Y                        | Y                             | N                                                 |                                | N                                                 |                                | N                                                 |
| CC0860      | inositol ABC transport system, permease protein iatP                                        | iatP   | N                        | N                             | N                                                 |                                | N                                                 |                                | N                                                 |
| CC0861      | Hypothetical protein                                                                        |        | N                        | N                             | N                                                 |                                | N                                                 |                                | N                                                 |
| CC0862      | Conserved hypothetical protein                                                              |        | Y                        | Y                             | N                                                 |                                | N                                                 |                                | N                                                 |
| CC0863      | 3-oxoacyl-[acyl-carrier-protein] synthase III                                               |        | Y                        | Y                             | N                                                 |                                | N                                                 |                                | N                                                 |
| CC0864      | 3-oxoacyl-[acyl-carrier-protein] synthase III                                               |        | Y                        | N                             | N                                                 |                                | N                                                 |                                | N                                                 |
| CC0865      | Conserved hypothetical protein                                                              |        | Y                        | Y                             | N                                                 |                                | N                                                 |                                | N                                                 |
| CC0866      | Erythromycin esterase family protein                                                        |        | N                        | N                             | N                                                 |                                | N                                                 |                                | N                                                 |
| CC0867      | Hypothetical ATP-binding protein                                                            |        | Y                        | Y                             | N                                                 |                                | N                                                 |                                | N                                                 |
| CC0868      | 6-aminohexanoate-dimer hydrolase                                                            |        | Y                        | N                             | N                                                 |                                | N                                                 |                                | N                                                 |
| CC0869      | Hypothetical protein                                                                        |        | Y                        | Y                             | N                                                 |                                | N                                                 |                                | N                                                 |
| CC0870      | Acetyltransferase                                                                           |        | Y                        | Y                             | N                                                 |                                | N                                                 |                                | N                                                 |
| CC0871      | Xylene monooxygenase electron transfer component                                            |        | Y                        | Y                             | N                                                 |                                | N                                                 |                                | N                                                 |
| CC0872      | toxin protein parE-1                                                                        | parE-1 | Y                        | Y                             | N                                                 |                                | N                                                 |                                | N                                                 |
| CC0873      | antitoxin protein parD-1                                                                    | parD-1 | Y                        | Y                             | N                                                 |                                | N                                                 |                                | N                                                 |
| CC0874      | Peptide release factor-glutamine N5-methyltransferase                                       |        | Y                        | Y                             | N                                                 |                                | N                                                 |                                | N                                                 |
| CC0875      | Hypothetical cytosolic protein                                                              |        | Y                        | Y                             | N                                                 |                                | N                                                 |                                | N                                                 |
| CC0876      | Zinc metalloprotease                                                                        |        | Y                        | Y                             | N                                                 |                                | N                                                 |                                | N                                                 |
| CC0877      | ClpB protein                                                                                | clpB   | Y                        | Y                             | N                                                 |                                | N                                                 |                                | N                                                 |
| CC0878      | Hypothetical protein                                                                        |        | Y                        | Y                             | N                                                 |                                | N                                                 |                                | N                                                 |
| CC0879      | Transcriptional regulators, MarR/EmrR family                                                |        | N                        | N                             | N                                                 |                                | N                                                 |                                | N                                                 |
| CC0880      | Conserved hypothetical protein                                                              |        | Y                        | Y                             | N                                                 |                                | N                                                 |                                | N                                                 |
| CC0881      | Acyl CoA thioesterase                                                                       |        | N                        | N                             | N                                                 |                                | N                                                 |                                | N                                                 |
| CC0882      | Hypothetical protein                                                                        |        | Y                        | Y                             | N                                                 |                                | N                                                 |                                | N                                                 |
| CC0883      |                                                                                             |        |                          |                               |                                                   |                                |                                                   |                                |                                                   |

| Gene Number | Annotation                                                                                                                                       | Gene | Entry Vector Constructed | Entry Vector Sequence Correct | Localized and Sequence-verified C-terminal Fusion | Localization w/ C-terminal Tag | Localized and Sequence-verified N-terminal Fusion | Localization w/ N-terminal Tag | Protein Localized as Both N- or C-terminal Fusion |
|-------------|--------------------------------------------------------------------------------------------------------------------------------------------------|------|--------------------------|-------------------------------|---------------------------------------------------|--------------------------------|---------------------------------------------------|--------------------------------|---------------------------------------------------|
| CC0884      | Transcriptional regulator, GntR family Diaminohydroxyphosphoribosylaminopyrimidine deaminase / 5-amino-6-(5-phosphoribosylamino)uracil reductase |      | N                        | N                             | N                                                 |                                | N                                                 |                                | N                                                 |
| CC0885      | Riboflavin synthase alpha chain                                                                                                                  |      | N                        | N                             | N                                                 |                                | N                                                 |                                | N                                                 |
| CC0886      | GTP cyclohydrolase II / 3,4-dihydroxy-2-butanone-4-phosphate synthase                                                                            |      | Y                        | Y                             | N                                                 |                                | N                                                 |                                | N                                                 |
| CC0887      | 6,7-dimethyl-8-ribityllumazine synthase                                                                                                          |      | N                        | N                             | N                                                 |                                | N                                                 |                                | N                                                 |
| CC0888      | Hypothetical peptidase                                                                                                                           |      | Y                        | Y                             | Y                                                 | Patchy/Spotty                  | N                                                 |                                | N                                                 |
| CC0889      | Conserved hypothetical protein                                                                                                                   |      | Y                        | Y                             | N                                                 |                                | N                                                 |                                | N                                                 |
| CC0890      | Transcriptional regulator                                                                                                                        |      | N                        | N                             | N                                                 |                                | N                                                 |                                | N                                                 |
| CC0891      | Conserved hypothetical protein                                                                                                                   |      | Y                        | Y                             | N                                                 |                                | N                                                 |                                | N                                                 |
| CC0892      | Acetyltransferase                                                                                                                                |      | Y                        | Y                             | N                                                 |                                | N                                                 |                                | N                                                 |
| CC0893      | Acetyl-CoA acetyltransferase                                                                                                                     |      | Y                        | N                             | N                                                 |                                | N                                                 |                                | N                                                 |
| CC0894      | Transcriptional regulator, MarR family                                                                                                           |      | Y                        | Y                             | N                                                 |                                | N                                                 |                                | N                                                 |
| CC0895      | Sensory transduction protein kinase                                                                                                              |      | Y                        | N                             | N                                                 |                                | N                                                 |                                | N                                                 |
| CC0896      | tRNA (5-methylaminomethyl-2-thiouridylate)-methyltransferase                                                                                     |      | Y                        | N                             | N                                                 |                                | N                                                 |                                | N                                                 |
| CC0897      | flagellar hook-associated protein flgL                                                                                                           | flgL | Y                        | Y                             | N                                                 |                                | N                                                 |                                | N                                                 |
| CC0898      | flagellar hook-associated protein flaN                                                                                                           | flaN | Y                        | Y                             | Y                                                 | Central - Focus                | N                                                 |                                | N                                                 |
| CC0899      | Chemotaxis motD protein                                                                                                                          |      | N                        | N                             | N                                                 |                                | N                                                 |                                | N                                                 |
| CC0900      | Basal-body rod modification protein flgD                                                                                                         | flgD | Y                        | Y                             | N                                                 |                                | N                                                 |                                | N                                                 |
| CC0901      | Flagellar hook protein flgE                                                                                                                      | flgE | Y                        | Y                             | N                                                 |                                | N                                                 |                                | N                                                 |
| CC0902      | Hypothetical protein                                                                                                                             |      | Y                        | Y                             | N                                                 |                                | N                                                 |                                | N                                                 |
| CC0903      | Hypothetical protein                                                                                                                             |      | Y                        | Y                             | N                                                 |                                | N                                                 |                                | N                                                 |
| CC0904      | Flagellar M-ring protein flIF                                                                                                                    | flIF | Y                        | Y                             | N                                                 |                                | Y                                                 | Middle OR Pole                 | N                                                 |
| CC0905      | Flagellar motor switch protein flIG                                                                                                              | flIG | Y                        | Y                             | Y                                                 | Pole                           | Y                                                 | Pole                           | Y                                                 |
| CC0906      | FliE protein                                                                                                                                     | flbE | N                        | N                             | N                                                 |                                | N                                                 |                                | N                                                 |
| CC0907      | Flagellar motor switch protein flIN                                                                                                              | flIN | N                        | N                             | N                                                 |                                | N                                                 |                                | N                                                 |
| CC0908      | AAA-family response regulator flbD                                                                                                               | flbD | Y                        | Y                             | N                                                 |                                | N                                                 |                                | N                                                 |
| CC0909      | Flagellar biosynthesis protein flhA                                                                                                              | flhA | Y                        | Y                             | N                                                 |                                | N                                                 |                                | N                                                 |
| CC0910      | Porin O precursor                                                                                                                                |      | Y                        | Y                             | N                                                 |                                | N                                                 |                                | N                                                 |
| CC0911      | Hypothetical protein                                                                                                                             |      | Y                        | Y                             | N                                                 |                                | N                                                 |                                | N                                                 |
| CC0912      | Transcriptional regulator, TetR family                                                                                                           |      | Y                        | Y                             | N                                                 |                                | N                                                 |                                | N                                                 |
| CC0913      | Hypothetical protein                                                                                                                             |      | Y                        | Y                             | N                                                 |                                | N                                                 |                                | N                                                 |
| CC0914      | Transcriptional regulator, MarR family                                                                                                           |      | Y                        | Y                             | N                                                 |                                | N                                                 |                                | N                                                 |
| CC0915      | Organic hydroperoxide resistance protein                                                                                                         |      | Y                        | Y                             | N                                                 |                                | N                                                 |                                | N                                                 |
| CC0916      | Chaperone protein dnaJ                                                                                                                           |      | N                        | N                             | N                                                 |                                | N                                                 |                                | N                                                 |
| CC0917      | Pyridoxamine 5'-phosphate oxidase                                                                                                                |      | Y                        | Y                             | N                                                 |                                | N                                                 |                                | N                                                 |
| CC0918      | Transcriptional regulator, TetR family                                                                                                           |      | Y                        | Y                             | N                                                 |                                | N                                                 |                                | N                                                 |
| CC0919      | Gluconate kinase                                                                                                                                 |      | N                        | N                             | N                                                 |                                | N                                                 |                                | N                                                 |
| CC0920      | Two component sensor histidine kinase                                                                                                            |      | Y                        | Y                             | Y                                                 | Patchy/Spotty                  | N                                                 |                                | N                                                 |
| CC0921      | Long-chain-fatty-acid--CoA ligase                                                                                                                |      | N                        | N                             | N                                                 |                                | N                                                 |                                | N                                                 |
| CC0922      | Hydroxyacylglutathione hydrolase                                                                                                                 |      | Y                        | Y                             | N                                                 |                                | N                                                 |                                | N                                                 |
| CC0923      | Hypothetical phosphatase                                                                                                                         |      | Y                        | Y                             | N                                                 |                                | N                                                 |                                | N                                                 |
| CC0924      | OAR protein precursor                                                                                                                            |      | Y                        | Y                             | N                                                 |                                | N                                                 |                                | N                                                 |
| CC0925      | Hypothetical protein                                                                                                                             |      | Y                        | Y                             | N                                                 |                                | N                                                 |                                | N                                                 |
| CC0926      | Signal peptide peptidase sppA                                                                                                                    | sppA | Y                        | Y                             | N                                                 |                                | N                                                 |                                | N                                                 |
| CC0927      | Transposase                                                                                                                                      |      | Y                        | Y                             | N                                                 |                                | N                                                 |                                | N                                                 |
| CC0928      | Transposase                                                                                                                                      |      | Y                        | Y                             | N                                                 |                                | N                                                 |                                | N                                                 |
| CC0929      | Periplasmic efflux protein, lipoprotein precursor                                                                                                |      | N                        | N                             | N                                                 |                                | N                                                 |                                | N                                                 |

| Gene Number | Annotation                                                                         | Gene | Entry Vector Constructed | Entry Vector Sequence Correct | Localized and Sequence-verified C-terminal Fusion | Localization w/ C-terminal Tag | Localized and Sequence-verified N-terminal Fusion | Localization w/ N-terminal Tag | Protein Localized as Both N- or C-terminal Fusion |
|-------------|------------------------------------------------------------------------------------|------|--------------------------|-------------------------------|---------------------------------------------------|--------------------------------|---------------------------------------------------|--------------------------------|---------------------------------------------------|
| CC0931      | ABC-type transport system involved in lipoprotein release, permease component lolE | lolE | Y                        | Y                             | N                                                 |                                | N                                                 |                                | N                                                 |
| CC0932      | ABC-type transport system involved in lipoprotein release, ATPase component lolD   | lolD | Y                        | Y                             | N                                                 |                                | N                                                 |                                | N                                                 |
| CC0933      | Transcriptional regulator hybrid sensor histidine kinase/receiver protein          |      | Y                        | Y                             | N                                                 |                                | N                                                 |                                | N                                                 |
| CC0934      | Phosphinothricin N-acetyltransferase                                               |      | N                        | N                             | N                                                 |                                | N                                                 |                                | N                                                 |
| CC0935      | Protease II                                                                        |      | Y                        | Y                             | N                                                 |                                | N                                                 |                                | N                                                 |
| CC0936      | General stress protein 17O                                                         |      | Y                        | N                             | N                                                 |                                | N                                                 |                                | N                                                 |
| CC0937      | Hypothetical protein                                                               |      | Y                        | Y                             | N                                                 |                                | N                                                 |                                | N                                                 |
| CC0938      | Isopenicillin N epimerase                                                          |      | Y                        | Y                             | N                                                 |                                | N                                                 |                                | N                                                 |
| CC0939      | acyl esterase protein                                                              |      | N                        | N                             | N                                                 |                                | N                                                 |                                | N                                                 |
| CC0940      | General stress protein 17O                                                         |      | Y                        | Y                             | N                                                 |                                | N                                                 |                                | N                                                 |
| CC0941      | Nodulation protein N                                                               |      | Y                        | Y                             | N                                                 |                                | N                                                 |                                | N                                                 |
| CC0942      | Conserved hypothetical protein                                                     |      | N                        | N                             | N                                                 |                                | N                                                 |                                | N                                                 |
| CC0943      | Long-chain-fatty-acid--CoA ligase                                                  |      | Y                        | Y                             | N                                                 |                                | N                                                 |                                | N                                                 |
| CC0944      | Oxidoreductase, GMC family                                                         |      | N                        | N                             | N                                                 |                                | N                                                 |                                | N                                                 |
| CC0945      | Putative cytochrome P450 YJIB                                                      |      | Y                        | Y                             | N                                                 |                                | N                                                 |                                | N                                                 |
| CC0946      | Enoyl-CoA hydratase                                                                |      | Y                        | Y                             | N                                                 |                                | N                                                 |                                | N                                                 |
| CC0947      | Conserved hypothetical protein                                                     |      | Y                        | Y                             | N                                                 |                                | N                                                 |                                | N                                                 |
| CC0948      | Transcriptional regulator                                                          |      | Y                        | Y                             | N                                                 |                                | N                                                 |                                | N                                                 |
| CC0949      | Conserved hypothetical protein                                                     |      | Y                        | Y                             | N                                                 |                                | N                                                 |                                | N                                                 |
| CC0950      | Flagellar biosynthetic protein fliP                                                | fliP | Y                        | Y                             | N                                                 |                                | N                                                 |                                | N                                                 |
| CC0951      | Hypothetical protein                                                               |      | N                        | N                             | N                                                 |                                | N                                                 |                                | N                                                 |
| CC0952      | Flagellar basal-body rod protein flgB                                              | flgB | Y                        | Y                             | N                                                 |                                | N                                                 |                                | N                                                 |
| CC0953      | Flagellar basal-body rod protein flgC                                              | flgC | Y                        | Y                             | N                                                 |                                | N                                                 |                                | N                                                 |
| CC0954      | Flagellar hook-basal body complex protein fliE                                     | fliE | Y                        | N                             | N                                                 |                                | N                                                 |                                | N                                                 |
| CC0955      | Hypothetical protein                                                               |      | Y                        | N                             | N                                                 |                                | N                                                 |                                | N                                                 |
| CC0956      | Urocanate hydratase                                                                |      | N                        | N                             | N                                                 |                                | N                                                 |                                | N                                                 |
| CC0957      | N-formylglutamate deformylase                                                      |      | Y                        | Y                             | N                                                 |                                | N                                                 |                                | N                                                 |
| CC0958      | Histidine ammonia-lyase                                                            |      | Y                        | Y                             | N                                                 |                                | N                                                 |                                | N                                                 |
| CC0959      | Imidazolonepropionase                                                              |      | Y                        | Y                             | N                                                 |                                | N                                                 |                                | N                                                 |
| CC0960      | Atrazine chlorohydrolase                                                           |      | N                        | N                             | N                                                 |                                | N                                                 |                                | N                                                 |
| CC0961      | Histidine utilization repressor                                                    |      | N                        | N                             | N                                                 |                                | N                                                 |                                | N                                                 |
| CC0962      | Regulatory protein                                                                 |      | Y                        | Y                             | N                                                 |                                | N                                                 |                                | N                                                 |
| CC0963      | Multicopper oxidase PcoA                                                           |      | Y                        | Y                             | N                                                 |                                | N                                                 |                                | N                                                 |
| CC0964      | Copper resistance protein B                                                        |      | Y                        | Y                             | N                                                 |                                | N                                                 |                                | N                                                 |
| CC0965      | AMP-(fatty)acid ligases                                                            |      | Y                        | Y                             | N                                                 |                                | N                                                 |                                | N                                                 |
| CC0966      | D-galactose 1-dehydrogenase                                                        |      | Y                        | Y                             | N                                                 |                                | N                                                 |                                | N                                                 |
| CC0967      | Beta-glucosidase                                                                   |      | Y                        | N                             | N                                                 |                                | N                                                 |                                | N                                                 |
| CC0968      | Transcriptional regulator, Lacl family                                             |      | Y                        | Y                             | Y                                                 | Patchy/Spotty                  | Y                                                 | Patchy/Spotty                  | Y                                                 |
| CC0969      | TonB-dependent receptor                                                            |      | Y                        | Y                             | N                                                 |                                | N                                                 |                                | N                                                 |
| CC0970      | Tryptophan halogenase                                                              |      | Y                        | Y                             | N                                                 |                                | N                                                 |                                | N                                                 |
| CC0971      | Tryptophan halogenase                                                              |      | Y                        | Y                             | Y                                                 | Pole                           | N                                                 |                                | N                                                 |
| CC0972      | Hypothetical protein                                                               |      | Y                        | Y                             | N                                                 |                                | N                                                 |                                | N                                                 |
| CC0973      | Hypothetical protein                                                               |      | Y                        | Y                             | N                                                 |                                | N                                                 |                                | N                                                 |
| CC0974      | Hypothetical protein                                                               |      | Y                        | Y                             | N                                                 |                                | N                                                 |                                | N                                                 |
| CC0975      | Acetyltransferase                                                                  |      | Y                        | N                             | N                                                 |                                | N                                                 |                                | N                                                 |
| CC0976      | Cytosol aminopeptidase                                                             |      | Y                        | Y                             | N                                                 |                                | N                                                 |                                | N                                                 |
| CC0977      | Alpha-L-rhamnosidase                                                               |      | Y                        | N                             | N                                                 |                                | N                                                 |                                | N                                                 |
| CC0978      |                                                                                    |      |                          |                               |                                                   |                                |                                                   |                                |                                                   |

| Gene Number | Annotation                                    | Gene  | Entry Vector Constructed | Entry Vector Sequence Correct | Localized and Sequence-verified C-terminal Fusion | Localization w/ C-terminal Tag | Localized and Sequence-verified N-terminal Fusion | Localization w/ N-terminal Tag | Protein Localized as Both N- or C-terminal Fusion |
|-------------|-----------------------------------------------|-------|--------------------------|-------------------------------|---------------------------------------------------|--------------------------------|---------------------------------------------------|--------------------------------|---------------------------------------------------|
| CC0979      | Peptidyl-prolyl cis-trans isomerase           |       | Y                        | Y                             | N                                                 |                                | N                                                 |                                | N                                                 |
| CC0980      | Transporter                                   |       | Y                        | Y                             | N                                                 |                                | N                                                 |                                | N                                                 |
| CC0981      | RNA polymerase ECF-type sigma factor          |       | Y                        | Y                             | N                                                 |                                | N                                                 |                                | N                                                 |
| CC0982      | FecR family protein                           |       | N                        | N                             | N                                                 |                                | N                                                 |                                | N                                                 |
| CC0983      | TonB-dependent outer membrane receptor        |       | N                        | N                             | N                                                 |                                | N                                                 |                                | N                                                 |
| CC0984      | Gamma-glutamyltranspeptidase                  |       | Y                        | Y                             | N                                                 |                                | N                                                 |                                | N                                                 |
| CC0985      |                                               |       | N                        | N                             | N                                                 |                                | N                                                 |                                | N                                                 |
| CC0986      | Transcriptional regulator, GntR family        |       | Y                        | N                             | N                                                 |                                | N                                                 |                                | N                                                 |
| CC0987      | Glyoxalase family protein                     |       | Y                        | Y                             | N                                                 |                                | N                                                 |                                | N                                                 |
| CC0988      | Hexuronate transporter                        |       | Y                        | Y                             | N                                                 |                                | N                                                 |                                | N                                                 |
| CC0989      | Beta-xylosidase / Alpha-L-arabinofuranosidase |       | Y                        | N                             | N                                                 |                                | N                                                 |                                | N                                                 |
| CC0990      | Hypothetical protein                          |       | Y                        | Y                             | N                                                 |                                | N                                                 |                                | N                                                 |
| CC0991      | TonB-dependent receptor                       |       | Y                        | Y                             | N                                                 |                                | N                                                 |                                | N                                                 |
| CC0992      | Hypothetical protein                          |       | Y                        | Y                             | N                                                 |                                | N                                                 |                                | N                                                 |
| CC0993      | Transcriptional regulator                     |       | Y                        | Y                             | N                                                 |                                | N                                                 |                                | N                                                 |
| CC0994      | Conserved hypothetical cytosolic protein      |       | Y                        | Y                             | N                                                 |                                | N                                                 |                                | N                                                 |
| CC0995      | Peptide methionine sulfoxide reductase msrA   |       | Y                        | Y                             | N                                                 |                                | N                                                 |                                | N                                                 |
| CC0996      | TonB-dependent receptor                       |       | Y                        | N                             | N                                                 |                                | N                                                 |                                | N                                                 |
| CC0997      | Hypothetical protein                          |       | N                        | N                             | N                                                 |                                | N                                                 |                                | N                                                 |
| CC0998      | ABC transporter ATP-binding protein           |       | Y                        | Y                             | N                                                 |                                | N                                                 |                                | N                                                 |
| CC0999      | TonB-dependent receptor                       |       | N                        | N                             | N                                                 |                                | N                                                 |                                | N                                                 |
| CC1000      | SapC family protein                           |       | Y                        | Y                             | N                                                 |                                | N                                                 |                                | N                                                 |
| CC1001      | Acetyltransferase                             |       | Y                        | Y                             | N                                                 |                                | N                                                 |                                | N                                                 |
| CC1002      | Tryptophan halogenase                         |       | Y                        | Y                             | N                                                 |                                | N                                                 |                                | N                                                 |
| CC1003      | Hypothetical glycosyl transferase             |       | Y                        | Y                             | N                                                 |                                | N                                                 |                                | N                                                 |
| CC1004      | Methyltransferase                             |       | Y                        | Y                             | N                                                 |                                | N                                                 |                                | N                                                 |
| CC1005      | STS1                                          |       | Y                        | Y                             | N                                                 |                                | N                                                 |                                | N                                                 |
| CC1006      | Transcriptional regulator                     |       | Y                        | Y                             | N                                                 |                                | N                                                 |                                | N                                                 |
| CC1007      | S-layer protein rsaA                          | rsaA  | Y                        | N                             | N                                                 |                                | N                                                 |                                | N                                                 |
| CC1008      | Type I protein secretion ATP-binding protein  | rsaD  | Y                        | Y                             | N                                                 |                                | Y                                                 | Patchy/Spotty                  | N                                                 |
| CC1009      | Type I secretion adaptor protein rsaE         | rsaE  | Y                        | Y                             | N                                                 |                                | N                                                 |                                | N                                                 |
| CC1010      | GDP-mannose 4,6 dehydratase                   |       | Y                        | Y                             | N                                                 |                                | N                                                 |                                | N                                                 |
| CC1011      | Putative UDP-perosamine 4-acetyl transferase  |       | Y                        | Y                             | N                                                 |                                | N                                                 |                                | N                                                 |
| CC1012      | Perosamine synthetase                         |       | Y                        | Y                             | N                                                 |                                | N                                                 |                                | N                                                 |
| CC1013      | Glycosyltransferase                           |       | Y                        | Y                             | N                                                 |                                | N                                                 |                                | N                                                 |
| CC1014      | Glycosyltransferase                           |       | Y                        | Y                             | N                                                 |                                | N                                                 |                                | N                                                 |
| CC1015      | Type I secretion outer membrane protein       | rsaFa | Y                        | Y                             | N                                                 |                                | N                                                 |                                | N                                                 |
| CC1016      | Mannosyltransferase                           |       | Y                        | Y                             | N                                                 |                                | N                                                 |                                | N                                                 |
| CC1017      | Methyltransferase                             |       | Y                        | Y                             | Y                                                 | Central - Focus                | N                                                 |                                | N                                                 |
| CC1018      | Hypothetical protein                          |       | Y                        | Y                             | N                                                 |                                | N                                                 |                                | N                                                 |
| CC1019      | Alpha-ketoglutarate permease                  |       | Y                        | Y                             | N                                                 |                                | N                                                 |                                | N                                                 |
| CC1020      | Hypothetical protein                          |       | Y                        | N                             | N                                                 |                                | N                                                 |                                | N                                                 |
| CC1021      | zinc-finger protein                           |       | Y                        | Y                             | N                                                 |                                | N                                                 |                                | N                                                 |
| CC1022      | Entericidin B homolog                         |       | Y                        | N                             | N                                                 |                                | N                                                 |                                | N                                                 |
| CC1023      | Cell division protein ftsZ                    | ftsZ  | Y                        | Y                             | Y                                                 | Patchy/Spotty                  | N                                                 |                                | N                                                 |
| CC1024      | Beta/Gamma crystallin domain protein          |       | Y                        | N                             | N                                                 |                                | N                                                 |                                | N                                                 |
| CC1025      | Penicillin acylase                            |       | Y                        | Y                             | N                                                 |                                | N                                                 |                                | N                                                 |
| CC1026      | Methyltransferase                             |       | Y                        | Y                             | N                                                 |                                | N                                                 |                                | N                                                 |
| CC1027      | Hypotetical protein                           |       | Y                        | N                             | N                                                 |                                | N                                                 |                                | N                                                 |

| Gene Number | Annotation                                               | Gene   | Entry Vector Constructed | Entry Vector Sequence Correct | Localized and Sequence-verified C-terminal Fusion | Localization w/ C-terminal Tag | Localized and Sequence-verified N-terminal Fusion | Localization w/ N-terminal Tag | Protein Localized as Both N- or C-terminal Fusion |
|-------------|----------------------------------------------------------|--------|--------------------------|-------------------------------|---------------------------------------------------|--------------------------------|---------------------------------------------------|--------------------------------|---------------------------------------------------|
| CC1028      | Hypothetical protein                                     |        | Y                        | N                             | N                                                 |                                | N                                                 |                                | N                                                 |
| CC1029      | Conserved hypothetical protein                           |        | Y                        | N                             | N                                                 |                                | N                                                 |                                | N                                                 |
| CC1030      | Hypothetical protein                                     |        | N                        | N                             | N                                                 |                                | N                                                 |                                | N                                                 |
| CC1031      | Hypothetical protein                                     |        | Y                        | Y                             | N                                                 |                                | N                                                 |                                | N                                                 |
| CC1032      | Hypothetical protein                                     |        | Y                        | Y                             | N                                                 |                                | N                                                 |                                | N                                                 |
| CC1033      | DNA-cytosine methyltransferase                           |        | Y                        | Y                             | N                                                 |                                | N                                                 |                                | N                                                 |
| CC1034      | GTP-binding protein lepA                                 | lepA   | N                        | N                             | N                                                 |                                | N                                                 |                                | N                                                 |
| CC1035      | Conserved hypothetical protein                           |        | Y                        | Y                             | N                                                 |                                | N                                                 |                                | N                                                 |
| CC1036      | Hypothetical membrane spanning protein                   |        | Y                        | Y                             | Y                                                 | Patchy/Spotty                  | Y                                                 | Patchy/Spotty                  | Y                                                 |
| CC1037      | Conserved protein                                        |        | Y                        | N                             | N                                                 |                                | N                                                 |                                | N                                                 |
| CC1038      | Conserved protein                                        |        | Y                        | Y                             | N                                                 |                                | N                                                 |                                | N                                                 |
| CC1039      | Peptide methionine sulfoxide reductase                   |        | Y                        | Y                             | N                                                 |                                | N                                                 |                                | N                                                 |
| CC1040      | Hypothetical protein                                     |        | N                        | N                             | N                                                 |                                | N                                                 |                                | N                                                 |
| CC1041      | Hypothetical protein                                     |        | Y                        | Y                             | Y                                                 | Pole                           | Y                                                 | Pole                           | Y                                                 |
| CC1042      | Hypothetical protein                                     |        | Y                        | Y                             | N                                                 |                                | N                                                 |                                | N                                                 |
| CC1043      | Phenylalanyl-tRNA synthetase beta chain                  |        | Y                        | N                             | N                                                 |                                | N                                                 |                                | N                                                 |
| CC1044      | Phenylalanyl-tRNA synthetase alpha chain                 |        | Y                        | Y                             | N                                                 |                                | N                                                 |                                | N                                                 |
| CC1045      | LSU ribosomal protein L20P                               |        | Y                        | Y                             | N                                                 |                                | N                                                 |                                | N                                                 |
| CC1046      | LSU ribosomal protein L35P                               |        | Y                        | Y                             | N                                                 |                                | N                                                 |                                | N                                                 |
| CC1047      | Tetracycline resistance protein                          |        | N                        | N                             | N                                                 |                                | N                                                 |                                | N                                                 |
| CC1048      | Acylamino-acid-releasing enzyme                          |        | Y                        | Y                             | N                                                 |                                | N                                                 |                                | N                                                 |
| CC1049      | Bacterial Protein Translation Initiation Factor 3 (IF-3) |        | N                        | N                             | N                                                 |                                | N                                                 |                                | N                                                 |
| CC1050      | Hypothetical membrane spanning protein                   |        | Y                        | Y                             | N                                                 |                                | N                                                 |                                | N                                                 |
| CC1051      | ADP-heptose--LPS heptosyltransferase                     |        | N                        | N                             | N                                                 |                                | N                                                 |                                | N                                                 |
| CC1052      | Glycosyltransferase                                      |        | Y                        | Y                             | N                                                 |                                | N                                                 |                                | N                                                 |
| CC1053      | Alpha/beta hydrolase family protein                      |        | Y                        | Y                             | N                                                 |                                | N                                                 |                                | N                                                 |
| CC1054      | antitoxin protein parD-2                                 | parD-2 | Y                        | Y                             | N                                                 |                                | N                                                 |                                | N                                                 |
| CC1055      | Nucleoside-diphosphate-sugar epimerases                  |        | Y                        | Y                             | N                                                 |                                | N                                                 |                                | N                                                 |
| CC1056      | Hypothetical cytosolic protein                           |        | Y                        | Y                             | N                                                 |                                | N                                                 |                                | N                                                 |
| CC1057      | 2-dehydro-3-deoxygluconokinase                           |        | Y                        | Y                             | N                                                 |                                | N                                                 |                                | N                                                 |
| CC1058      | DnaA-related protein                                     |        | Y                        | Y                             | N                                                 |                                | N                                                 |                                | N                                                 |
| CC1059      | Hypothetical protein                                     |        | Y                        | Y                             | N                                                 |                                | N                                                 |                                | N                                                 |
| CC1060      | Rhodanese-related sulfurtransferases                     |        | N                        | N                             | N                                                 |                                | N                                                 |                                | N                                                 |
| CC1061      | SufE protein                                             |        | Y                        | Y                             | N                                                 |                                | N                                                 |                                | N                                                 |
| CC1062      | Two component sensor histidine kinase                    |        | Y                        | Y                             | N                                                 |                                | N                                                 |                                | N                                                 |
| CC1063      | Histidine protein kinase divJ                            | divJ   | Y                        | Y                             | N                                                 |                                | Y                                                 | Pole                           | N                                                 |
| CC1064      | Conserved hypothetical protein                           |        | Y                        | Y                             | N                                                 |                                | N                                                 |                                | N                                                 |
| CC1065      | Conserved hypothetical protein                           |        | Y                        | Y                             | N                                                 |                                | N                                                 |                                | N                                                 |
| CC1066      | Hypothetical protein                                     |        | Y                        | Y                             | N                                                 |                                | N                                                 |                                | N                                                 |
| CC1067      | Hypothetical protein                                     |        | Y                        | Y                             | N                                                 |                                | N                                                 |                                | N                                                 |
| CC1068      | Conserved hypothetical protein                           |        | Y                        | Y                             | N                                                 |                                | N                                                 |                                | N                                                 |
| CC1069      | Bacterial Peptide Chain Release Factor 3 (RF-3)          |        | N                        | N                             | N                                                 |                                | N                                                 |                                | N                                                 |
| CC1070      | Bacterial Peptide Chain Release Factor 3 (RF-3)          |        | Y                        | Y                             | N                                                 |                                | N                                                 |                                | N                                                 |
| CC1071      | Histidinol-phosphate aminotransferase                    |        | Y                        | Y                             | N                                                 |                                | N                                                 |                                | N                                                 |
| CC1072      | Ribonuclease H                                           |        | Y                        | Y                             | N                                                 |                                | N                                                 |                                | N                                                 |
| CC1073      | Hypothetical protein                                     |        | Y                        | Y                             | N                                                 |                                | N                                                 |                                | N                                                 |
| CC1074      | Hypothetical protein                                     |        | Y                        | Y                             | N                                                 |                                | N                                                 |                                | N                                                 |
| CC1075      | Flagellar biosynthetic protein fliQ                      | fliQ   | Y                        | N                             | N                                                 |                                | N                                                 |                                | N                                                 |
| CC1076      | flagellar biosynthesis protein fliR                      | fliR   | Y                        | Y                             | N                                                 |                                | N                                                 |                                | N                                                 |
| CC1077      | Flagellar biosynthetic protein fliB                      | fliB   | Y                        | Y                             | N                                                 |                                | N                                                 |                                | N                                                 |

| Gene Number | Annotation                                                  | Gene | Entry Vector Constructed | Entry Vector Sequence Correct | Localized and Sequence-verified C-terminal Fusion | Localization w/ C-terminal Tag | Localized and Sequence-verified N-terminal Fusion | Localization w/ N-terminal Tag | Protein Localized as Both N- or C-terminal Fusion |
|-------------|-------------------------------------------------------------|------|--------------------------|-------------------------------|---------------------------------------------------|--------------------------------|---------------------------------------------------|--------------------------------|---------------------------------------------------|
| CC1078      | Sensory transduction histidine kinase/receiver protein cckA | cckA | Y                        | Y                             | Y                                                 | Pole                           | Y                                                 | Pole                           | Y                                                 |
| CC1079      | Conserved hypothetical protein                              |      | N                        | N                             | N                                                 |                                | N                                                 |                                | N                                                 |
| CC1080      | LuxR family transcriptional regulator                       |      | Y                        | Y                             | N                                                 |                                | N                                                 |                                | N                                                 |
| CC1081      | Hypothetical protein                                        |      | Y                        | N                             | N                                                 |                                | N                                                 |                                | N                                                 |
| CC1082      | Conserved hypothetical protein                              |      | Y                        | Y                             | N                                                 |                                | N                                                 |                                | N                                                 |
| CC1083      | Ribosomal-protein-alanine acetyltransferase                 |      | Y                        | N                             | N                                                 |                                | N                                                 |                                | N                                                 |
| CC1084      | Hypothetical protein                                        |      | Y                        | Y                             | N                                                 |                                | N                                                 |                                | N                                                 |
| CC1085      | Hypothetical cytosolic protein                              |      | Y                        | Y                             | N                                                 |                                | N                                                 |                                | N                                                 |
| CC1086      | Sensory box/GGDEF family protein                            |      | Y                        | Y                             | N                                                 |                                | N                                                 |                                | N                                                 |
| CC1087      | RecA protein                                                |      | Y                        | Y                             | N                                                 |                                | N                                                 |                                | N                                                 |
| CC1088      |                                                             |      | Y                        | Y                             | N                                                 |                                | N                                                 |                                | N                                                 |
| CC1089      | Translation initiation inhibitor                            |      | Y                        | Y                             | N                                                 |                                | N                                                 |                                | N                                                 |
| CC1090      | Cytochrome c oxidase polypeptide II                         |      | Y                        | Y                             | N                                                 |                                | N                                                 |                                | N                                                 |
| CC1091      | Amine oxidase [flavin-containing]                           |      | Y                        | Y                             | N                                                 |                                | N                                                 |                                | N                                                 |
| CC1092      | Acetyltransferase                                           |      | Y                        | Y                             | N                                                 |                                | N                                                 |                                | N                                                 |
| CC1093      | TonB-dependent outer membrane receptor                      |      | N                        | N                             | N                                                 |                                | N                                                 |                                | N                                                 |
| CC1094      | Hypothetical protein                                        |      | Y                        | Y                             | N                                                 |                                | N                                                 |                                | N                                                 |
| CC1095      | Transcriptional regulator, DeoR family                      |      | N                        | N                             | N                                                 |                                | N                                                 |                                | N                                                 |
| CC1096      | Protein involved in external DNA uptake                     |      | Y                        | Y                             | N                                                 |                                | N                                                 |                                | N                                                 |
| CC1097      | Chromate transport protein                                  |      | Y                        | Y                             | N                                                 |                                | N                                                 |                                | N                                                 |
| CC1098      | Hypothetical protein                                        |      | Y                        | Y                             | N                                                 |                                | Y                                                 | Patchy/Spotty                  | N                                                 |
| CC1099      | TonB-dependent outer membrane receptor                      |      | N                        | N                             | N                                                 |                                | N                                                 |                                | N                                                 |
| CC1100      | Hypothetical protein                                        |      | Y                        | Y                             | N                                                 |                                | N                                                 |                                | N                                                 |
| CC1101      | Protoporphyrinogen oxidase                                  |      | N                        | N                             | N                                                 |                                | N                                                 |                                | N                                                 |
| CC1102      | Hypothetical protein                                        |      | Y                        | Y                             | N                                                 |                                | N                                                 |                                | N                                                 |
| CC1103      | Transporter, MFS superfamily                                |      | Y                        | Y                             | N                                                 |                                | N                                                 |                                | N                                                 |
| CC1104      | Proton/sodium-glutamate symport protein                     |      | Y                        | Y                             | N                                                 |                                | N                                                 |                                | N                                                 |
| CC1105      | Beta-glucosidase                                            |      | Y                        | N                             | N                                                 |                                | N                                                 |                                | N                                                 |
| CC1106      | Ice nucleation protein                                      |      | Y                        | N                             | N                                                 |                                | N                                                 |                                | N                                                 |
| CC1107      | O-linked GLCNAC transferase                                 |      | Y                        | Y                             | Y                                                 | Central - Focus                | Y                                                 | Central - Focus                | Y                                                 |
| CC1108      | Hypothetical protein                                        |      | N                        | N                             | N                                                 |                                | N                                                 |                                | N                                                 |
| CC1109      | Hypothetical cytosolic protein                              |      | Y                        | N                             | N                                                 |                                | N                                                 |                                | N                                                 |
| CC1110      | Acyl-CoA dehydrogenase                                      |      | N                        | N                             | N                                                 |                                | N                                                 |                                | N                                                 |
| CC1111      | 3-ketoacyl-CoA thiolase                                     |      | N                        | N                             | N                                                 |                                | N                                                 |                                | N                                                 |
| CC1112      | Hypothetical protein                                        |      | Y                        | Y                             | N                                                 |                                | N                                                 |                                | N                                                 |
| CC1113      | TonB-dependent receptor                                     |      | N                        | N                             | N                                                 |                                | N                                                 |                                | N                                                 |
| CC1114      | histidine phosphotransferase shpA                           | shpA | Y                        | Y                             | N                                                 |                                | N                                                 |                                | N                                                 |
| CC1115      | Hypothetical protein                                        |      | Y                        | Y                             | N                                                 |                                | N                                                 |                                | N                                                 |
| CC1116      | Chorismate mutase                                           |      | Y                        | Y                             | N                                                 |                                | N                                                 |                                | N                                                 |
| CC1117      | Transcriptional regulators, LysR family                     |      | Y                        | Y                             | N                                                 |                                | N                                                 |                                | N                                                 |
| CC1118      | Uroporphyrin-III C-methyltransferase                        |      | Y                        | Y                             | N                                                 |                                | N                                                 |                                | N                                                 |
| CC1119      | Sulfite reductase (Ferredoxin)                              |      | Y                        | Y                             | N                                                 |                                | N                                                 |                                | N                                                 |
| CC1120      | Oxidoreductase                                              |      | Y                        | Y                             | N                                                 |                                | N                                                 |                                | N                                                 |
| CC1121      | Phosphoadenosine phosphosulfate reductase                   |      | Y                        | Y                             | N                                                 |                                | N                                                 |                                | N                                                 |
| CC1122      | Penicillin acylase                                          |      | Y                        | Y                             | N                                                 |                                | N                                                 |                                | N                                                 |
| CC1123      | Conserved hypothetical protein                              |      | Y                        | Y                             | N                                                 |                                | N                                                 |                                | N                                                 |
| CC1124      | Glutathione S-transferase                                   |      | N                        | N                             | N                                                 |                                | N                                                 |                                | N                                                 |
| CC1125      | Conserved hypothetical protein                              |      | Y                        | Y                             | N                                                 |                                | N                                                 |                                | N                                                 |
| CC1126      | Phosphohydrolase (MutT/nudix family protein)                |      | Y                        | Y                             | N                                                 |                                | N                                                 |                                | N                                                 |
| CC1127      | Hypothetical protein                                        |      | Y                        | Y                             | N                                                 |                                | N                                                 |                                | N                                                 |



| Gene Number | Annotation                                                | Gene | Entry Vector Constructed | Entry Vector Sequence Correct | Localized and Sequence-verified C-terminal Fusion | Localization w/ C-terminal Tag | Localized and Sequence-verified N-terminal Fusion | Localization w/ N-terminal Tag | Protein Localized as Both N- or C-terminal Fusion |
|-------------|-----------------------------------------------------------|------|--------------------------|-------------------------------|---------------------------------------------------|--------------------------------|---------------------------------------------------|--------------------------------|---------------------------------------------------|
| CC1128      | Conserved hypothetical protein                            |      | Y                        | Y                             | N                                                 |                                | N                                                 |                                | N                                                 |
| CC1129      | RNA polymerase ECF-type sigma factor                      |      | Y                        | Y                             | N                                                 |                                | N                                                 |                                | N                                                 |
| CC1130      | FecR family protein                                       |      | Y                        | N                             | N                                                 |                                | N                                                 |                                | N                                                 |
| CC1131      | TonB-dependent receptor                                   |      | Y                        | N                             | N                                                 |                                | N                                                 |                                | N                                                 |
| CC1132      | Hypothetical protein                                      |      | Y                        | Y                             | N                                                 |                                | N                                                 |                                | N                                                 |
| CC1133      | Transporter, MFS superfamily                              |      | Y                        | Y                             | N                                                 |                                | N                                                 |                                | N                                                 |
| CC1134      | Fructokinase                                              |      | Y                        | N                             | N                                                 |                                | N                                                 |                                | N                                                 |
| CC1135      | Amylosucrase                                              |      | Y                        | Y                             | N                                                 |                                | N                                                 |                                | N                                                 |
| CC1136      | TonB-dependent receptor                                   |      | Y                        | Y                             | N                                                 |                                | N                                                 |                                | N                                                 |
| CC1137      | Transcriptional regulator, LacI family                    |      | Y                        | Y                             | N                                                 |                                | N                                                 |                                | N                                                 |
| CC1138      | Iron-regulated outer membrane virulence protein precursor |      | Y                        | Y                             | N                                                 |                                | N                                                 |                                | N                                                 |
| CC1139      | Zinc finger protein                                       |      | Y                        | N                             | N                                                 |                                | N                                                 |                                | N                                                 |
| CC1140      | dTDP-4-dehydrorhamnose reductase                          |      | Y                        | Y                             | N                                                 |                                | N                                                 |                                | N                                                 |
| CC1141      | Glucose-1-phosphate thymidyltransferase                   |      | Y                        | Y                             | N                                                 |                                | N                                                 |                                | N                                                 |
| CC1142      | TonB-dependent receptor                                   |      | Y                        | N                             | N                                                 |                                | N                                                 |                                | N                                                 |
| CC1143      | Hypothetical protein                                      |      | N                        | N                             | N                                                 |                                | N                                                 |                                | N                                                 |
| CC1144      | Membrane alanine aminopeptidase                           |      | Y                        | Y                             | N                                                 |                                | N                                                 |                                | N                                                 |
| CC1145      | TonB-dependent receptor                                   |      | Y                        | Y                             | N                                                 |                                | N                                                 |                                | N                                                 |
| CC1146      | dTDP-glucose 4,6-dehydratase                              |      | Y                        | Y                             | Y                                                 | Pole                           | N                                                 |                                | N                                                 |
| CC1147      | ABC transporter ATP-binding protein                       |      | Y                        | Y                             | N                                                 |                                | N                                                 |                                | N                                                 |
| CC1148      | ABC transporter permease protein                          |      | Y                        | Y                             | N                                                 |                                | N                                                 |                                | N                                                 |
| CC1149      | Two-component sensor kinase yocF                          | yocF | N                        | N                             | N                                                 |                                | N                                                 |                                | N                                                 |
| CC1150      | Two-component response regulator yocG                     | yocG | Y                        | Y                             | N                                                 |                                | N                                                 |                                | N                                                 |
| CC1151      | L-lactate dehydrogenase (FMN-linked)                      |      | N                        | N                             | N                                                 |                                | N                                                 |                                | N                                                 |
| CC1152      | Nucleotidyltransferase family protein                     |      | Y                        | Y                             | N                                                 |                                | N                                                 |                                | N                                                 |
| CC1153      | Conserved hypothetical protein                            |      | Y                        | Y                             | N                                                 |                                | N                                                 |                                | N                                                 |
| CC1154      | dATP pyrophosphohydrolase                                 |      | N                        | N                             | N                                                 |                                | N                                                 |                                | N                                                 |
| CC1155      | Hypothetical membrane spanning protein                    |      | Y                        | Y                             | N                                                 |                                | N                                                 |                                | N                                                 |
| CC1156      | Hypothetical membrane spanning protein                    |      | Y                        | Y                             | N                                                 |                                | N                                                 |                                | N                                                 |
| CC1157      | Histidine triad (HIT) protein                             |      | Y                        | Y                             | N                                                 |                                | N                                                 |                                | N                                                 |
| CC1158      | Phosphohydrolase, lcc family                              |      | Y                        | Y                             | N                                                 |                                | Y                                                 | Patchy/Spotty                  | N                                                 |
| CC1159      | Phosphatidylglycerophosphate synthase                     |      | N                        | N                             | N                                                 |                                | N                                                 |                                | N                                                 |
| CC1160      | Sphingosine kinase/diacylglycerol kinase-related protein  |      | Y                        | Y                             | N                                                 |                                | N                                                 |                                | N                                                 |
| CC1161      | Hypothetical cytosolic protein                            |      | N                        | N                             | N                                                 |                                | N                                                 |                                | N                                                 |
| CC1162      | Serine palmitoyltransferase                               |      | Y                        | Y                             | N                                                 |                                | N                                                 |                                | N                                                 |
| CC1163      | Acyl carrier protein                                      |      | Y                        | Y                             | N                                                 |                                | N                                                 |                                | N                                                 |
| CC1164      | NADH-ubiquinone oxidoreductase                            |      | N                        | N                             | N                                                 |                                | N                                                 |                                | N                                                 |
| CC1165      | Acyl-CoA synthetase                                       |      | Y                        | Y                             | N                                                 |                                | N                                                 |                                | N                                                 |
| CC1166      | O-antigen and teichoic acid membrane transport protein    |      | Y                        | Y                             | N                                                 |                                | N                                                 |                                | N                                                 |
| CC1167      | Glycerophosphotransferase-related protein                 |      | Y                        | Y                             | N                                                 |                                | N                                                 |                                | N                                                 |
| CC1168      | Conserved hypothetical protein                            |      | N                        | N                             | N                                                 |                                | N                                                 |                                | N                                                 |
| CC1169      | nitrilotriacetate monooxygenase                           |      | Y                        | Y                             | N                                                 |                                | N                                                 |                                | N                                                 |
| CC1170      | Pyrazinamidase / Nicotinamidase                           |      | Y                        | N                             | N                                                 |                                | N                                                 |                                | N                                                 |
| CC1171      | 2-hydroxychromene-2-carboxylate isomerase                 |      | Y                        | N                             | N                                                 |                                | N                                                 |                                | N                                                 |
| CC1172      | Sulfatase family protein                                  |      | Y                        | Y                             | N                                                 |                                | N                                                 |                                | N                                                 |
| CC1173      | NIRV family protein                                       |      | Y                        | N                             | N                                                 |                                | N                                                 |                                | N                                                 |
| CC1174      | Hypothetical cytosolic protein                            |      | N                        | N                             | N                                                 |                                | N                                                 |                                | N                                                 |
| CC1175      |                                                           |      | Y                        | Y                             | N                                                 |                                | N                                                 |                                | N                                                 |
| CC1176      | Metal-dependent hydrolase                                 |      | Y                        | Y                             | N                                                 |                                | N                                                 |                                | N                                                 |
| CC1177      | Hypothetical transcriptional regulatory protein           |      | Y                        | Y                             | N                                                 |                                | N                                                 |                                | N                                                 |

| Gene Number | Annotation                                                                                | Gene  | Entry Vector Constructed | Entry Vector Sequence Correct | Localized and Sequence-verified C-terminal Fusion | Localization w/ C-terminal Tag | Localized and Sequence-verified N-terminal Fusion | Localization w/ N-terminal Tag | Protein Localized as Both N- or C-terminal Fusion |
|-------------|-------------------------------------------------------------------------------------------|-------|--------------------------|-------------------------------|---------------------------------------------------|--------------------------------|---------------------------------------------------|--------------------------------|---------------------------------------------------|
| CC1178      | Hypothetical cytosolic protein                                                            |       | N                        | N                             | N                                                 |                                | N                                                 |                                | N                                                 |
| CC1179      | hypothetical protein                                                                      |       | Y                        | Y                             | N                                                 |                                | N                                                 |                                | N                                                 |
| CC1180      | EF-hand domain protein                                                                    |       | N                        | N                             | N                                                 |                                | N                                                 |                                | N                                                 |
| CC1181      | Two-component sensor histidine kinase                                                     |       | Y                        | Y                             | N                                                 |                                | N                                                 |                                | N                                                 |
| CC1182      | Two-component response regulator                                                          |       | Y                        | Y                             | N                                                 |                                | N                                                 |                                | N                                                 |
| CC1183      | Zn-dependent hydrolase, glyoxalase II family                                              |       | Y                        | Y                             | N                                                 |                                | N                                                 |                                | N                                                 |
| CC1184      | Amino acid permease                                                                       |       | Y                        | Y                             | N                                                 |                                | N                                                 |                                | N                                                 |
| CC1185      | ATP-dependent helicase hrpB                                                               |       | Y                        | Y                             | N                                                 |                                | N                                                 |                                | N                                                 |
| CC1186      | Hypothetical protein                                                                      |       | Y                        | Y                             | N                                                 |                                | N                                                 |                                | N                                                 |
| CC1187      | 23S rRNA methyltransferase                                                                |       | Y                        | Y                             | N                                                 |                                | Y                                                 | Pole                           | N                                                 |
| CC1188      | Methyltransferase                                                                         |       | Y                        | Y                             | N                                                 |                                | N                                                 |                                | N                                                 |
| CC1189      | N-acetylglucosaminyltransferase                                                           |       | Y                        | Y                             | N                                                 |                                | N                                                 |                                | N                                                 |
| CC1190      | Transcriptional regulator, TetR family                                                    |       | Y                        | Y                             | N                                                 |                                | N                                                 |                                | N                                                 |
| CC1191      | ABC transporter periplasmic binding protein                                               |       | Y                        | Y                             | N                                                 |                                | N                                                 |                                | N                                                 |
| CC1192      | Transporter                                                                               |       | N                        | N                             | N                                                 |                                | N                                                 |                                | N                                                 |
| CC1193      | Transporter                                                                               |       | Y                        | Y                             | N                                                 |                                | N                                                 |                                | N                                                 |
| CC1194      | Soluble lytic murein transglycosylase                                                     |       | Y                        | Y                             | N                                                 |                                | N                                                 |                                | N                                                 |
| CC1195      | Dihydrodipicolinate synthase                                                              | dapA  | Y                        | Y                             | N                                                 |                                | N                                                 |                                | N                                                 |
| CC1196      | SsrA-binding protein                                                                      |       | Y                        | Y                             | N                                                 |                                | N                                                 |                                | N                                                 |
| CC1197      | Hypothetical protein                                                                      |       | Y                        | Y                             | N                                                 |                                | N                                                 |                                | N                                                 |
| CC1198      | Hypothetical cytosolic protein                                                            |       | Y                        | Y                             | N                                                 |                                | N                                                 |                                | N                                                 |
| CC1199      | Permease                                                                                  |       | N                        | N                             | N                                                 |                                | N                                                 |                                | N                                                 |
| CC1200      | Permease                                                                                  |       | Y                        | Y                             | N                                                 |                                | N                                                 |                                | N                                                 |
| CC1201      | Class II Aldolase and Adducin proteins                                                    |       | Y                        | Y                             | N                                                 |                                | N                                                 |                                | N                                                 |
| CC1202      | Conserved hypothetical protein                                                            |       | Y                        | Y                             | N                                                 |                                | N                                                 |                                | N                                                 |
| CC1203      | Periplasmic multidrug efflux lipoprotein precursor                                        |       | Y                        | Y                             | N                                                 |                                | N                                                 |                                | N                                                 |
| CC1204      | Cation/multidrug efflux pump acrB                                                         | acrB3 | Y                        | N                             | N                                                 |                                | N                                                 |                                | N                                                 |
| CC1205      | Pyruvate dehydrogenase E1 component                                                       |       | Y                        | N                             | N                                                 |                                | N                                                 |                                | N                                                 |
| CC1206      | Transposase                                                                               |       | Y                        | Y                             | N                                                 |                                | N                                                 |                                | N                                                 |
| CC1207      | Hypothetical protein                                                                      |       | Y                        | Y                             | N                                                 |                                | N                                                 |                                | N                                                 |
| CC1208      | Hypothetical protein                                                                      |       | Y                        | Y                             | N                                                 |                                | N                                                 |                                | N                                                 |
| CC1209      | Hypothetical protein                                                                      |       | Y                        | Y                             | N                                                 |                                | N                                                 |                                | N                                                 |
| CC1210      | Cytochrome c                                                                              |       | Y                        | Y                             | N                                                 |                                | N                                                 |                                | N                                                 |
| CC1211      | Hypothetical protein                                                                      |       | Y                        | Y                             | N                                                 |                                | N                                                 |                                | N                                                 |
| CC1212      | Hypothetical protein                                                                      |       | Y                        | Y                             | N                                                 |                                | N                                                 |                                | N                                                 |
| CC1213      | Transcriptional regulator, MarR family                                                    |       | Y                        | Y                             | N                                                 |                                | N                                                 |                                | N                                                 |
| CC1214      | Peptidyl-tRNA hydrolase family protein                                                    |       | Y                        | Y                             | N                                                 |                                | N                                                 |                                | N                                                 |
| CC1215      | EMG2 protein                                                                              |       | Y                        | Y                             | N                                                 |                                | N                                                 |                                | N                                                 |
| CC1216      | piperideine-6-carboxylate dehydrogenase                                                   |       | Y                        | Y                             | N                                                 |                                | N                                                 |                                | N                                                 |
| CC1217      | Methylenetetrahydrofolate dehydrogenase (NADP+) / Methenyltetrahydrofolate cyclohydrolase |       | Y                        | Y                             | N                                                 |                                | N                                                 |                                | N                                                 |
| CC1218      | Cytochrome c5                                                                             |       | Y                        | Y                             | N                                                 |                                | N                                                 |                                | N                                                 |
| CC1219      | D-sorbitol oxidase                                                                        |       | N                        | N                             | N                                                 |                                | N                                                 |                                | N                                                 |
| CC1220      | histidine phosphotransferase domain protein                                               |       | Y                        | N                             | N                                                 |                                | N                                                 |                                | N                                                 |
| CC1221      | ATP-NAD kinase                                                                            |       | Y                        | Y                             | N                                                 |                                | N                                                 |                                | N                                                 |
| CC1222      | Conserved hypothetical protein                                                            |       | Y                        | Y                             | N                                                 |                                | N                                                 |                                | N                                                 |
| CC1223      | Glycerol kinase                                                                           |       | Y                        | Y                             | N                                                 |                                | N                                                 |                                | N                                                 |
| CC1224      | Gluconolactonase                                                                          |       | Y                        | Y                             | N                                                 |                                | N                                                 |                                | N                                                 |
| CC1225      | NAD-dependent oxidoreductase                                                              |       | Y                        | Y                             | N                                                 |                                | N                                                 |                                | N                                                 |
| CC1226      | Endo-1,4-beta-xylanase                                                                    |       | Y                        | N                             | N                                                 |                                | N                                                 |                                | N                                                 |
| CC1227      | Proline iminopeptidase                                                                    |       | N                        | N                             | N                                                 |                                | N                                                 |                                | N                                                 |

| Gene Number | Annotation                                        | Gene | Entry Vector Constructed | Entry Vector Sequence Correct | Localized and Sequence-verified C-terminal Fusion | Localization w/ C-terminal Tag | Localized and Sequence-verified N-terminal Fusion | Localization w/ N-terminal Tag | Protein Localized as Both N- or C-terminal Fusion |
|-------------|---------------------------------------------------|------|--------------------------|-------------------------------|---------------------------------------------------|--------------------------------|---------------------------------------------------|--------------------------------|---------------------------------------------------|
| CC1228      | Low temperature requirement protein A             |      | N                        | N                             | N                                                 |                                | N                                                 |                                | N                                                 |
| CC1229      | Epoxide hydrolase                                 |      | Y                        | Y                             | N                                                 |                                | N                                                 |                                | N                                                 |
| CC1230      | Multidrug resistance transporter, Bcr family      |      | Y                        | Y                             | N                                                 |                                | N                                                 |                                | N                                                 |
| CC1231      | Hypothetical membrane spanning protein            |      | Y                        | Y                             | N                                                 |                                | N                                                 |                                | N                                                 |
| CC1232      | Hypothetical protein                              |      | N                        | N                             | N                                                 |                                | N                                                 |                                | N                                                 |
| CC1233      | Phosphotransferase family protein                 |      | N                        | N                             | N                                                 |                                | N                                                 |                                | N                                                 |
| CC1234      | Hypothetical protein                              |      | Y                        | Y                             | N                                                 |                                | N                                                 |                                | N                                                 |
| CC1235      | Hypothetical protein                              |      | Y                        | N                             | N                                                 |                                | N                                                 |                                | N                                                 |
| CC1236      | Transposase                                       |      | Y                        | N                             | N                                                 |                                | N                                                 |                                | N                                                 |
| CC1237      | Integral membrane protein                         |      | Y                        | N                             | N                                                 |                                | N                                                 |                                | N                                                 |
| CC1238      | Hypothetical protein                              |      | Y                        | N                             | N                                                 |                                | N                                                 |                                | N                                                 |
| CC1239      | 23S rRNA Gm2251 methyltransferase                 |      | Y                        | Y                             | N                                                 |                                | N                                                 |                                | N                                                 |
| CC1240      | Protein Translation Elongation Factor Tu (EF-TU)  |      | Y                        | Y                             | N                                                 |                                | N                                                 |                                | N                                                 |
| CC1241      | Conserved hypothetical protein                    |      | Y                        | Y                             | N                                                 |                                | N                                                 |                                | N                                                 |
| CC1242      | Formate dehydrogenase accessory protein fdhD      | fdhD | Y                        | Y                             | N                                                 |                                | N                                                 |                                | N                                                 |
| CC1243      | NAD-dependent formate dehydrogenase alpha subunit |      | N                        | N                             | N                                                 |                                | N                                                 |                                | N                                                 |
| CC1244      | Conserved hypothetical protein                    |      | N                        | N                             | N                                                 |                                | N                                                 |                                | N                                                 |
| CC1245      | Conserved hypothetical protein                    |      | Y                        | Y                             | N                                                 |                                | N                                                 |                                | N                                                 |
| CC1246      | Hypothetical protein                              |      | Y                        | Y                             | N                                                 |                                | N                                                 |                                | N                                                 |
| CC1247      | SSU ribosomal protein S10P                        |      | Y                        | Y                             | N                                                 |                                | N                                                 |                                | N                                                 |
| CC1248      | LSU ribosomal protein L3P                         |      | Y                        | Y                             | N                                                 |                                | N                                                 |                                | N                                                 |
| CC1249      | LSU ribosomal protein L1E (= L4P)                 |      | Y                        | Y                             | N                                                 |                                | Y                                                 | Patchy/Spotty                  | N                                                 |
| CC1250      | LSU ribosomal protein L23P                        |      | Y                        | N                             | N                                                 |                                | N                                                 |                                | N                                                 |
| CC1251      | LSU ribosomal protein L2P                         |      | Y                        | Y                             | N                                                 |                                | N                                                 |                                | N                                                 |
| CC1252      | SSU ribosomal protein S19P                        |      | Y                        | Y                             | N                                                 |                                | N                                                 |                                | N                                                 |
| CC1253      | LSU ribosomal protein L22P                        |      | Y                        | Y                             | N                                                 |                                | N                                                 |                                | N                                                 |
| CC1254      | SSU ribosomal protein S3P                         |      | Y                        | Y                             | N                                                 |                                | N                                                 |                                | N                                                 |
| CC1255      | LSU ribosomal protein L16P                        |      | Y                        | Y                             | N                                                 |                                | N                                                 |                                | N                                                 |
| CC1256      | LSU ribosomal protein L29P                        |      | Y                        | Y                             | N                                                 |                                | N                                                 |                                | N                                                 |
| CC1257      | SSU ribosomal protein S17P                        |      | Y                        | Y                             | N                                                 |                                | N                                                 |                                | N                                                 |
| CC1258      | LSU ribosomal protein L14P                        |      | Y                        | Y                             | N                                                 |                                | N                                                 |                                | N                                                 |
| CC1259      | LSU ribosomal protein L24P                        |      | Y                        | Y                             | N                                                 |                                | N                                                 |                                | N                                                 |
| CC1260      | LSU ribosomal protein L5P                         |      | Y                        | Y                             | N                                                 |                                | N                                                 |                                | N                                                 |
| CC1261      | SSU ribosomal protein S14P                        |      | N                        | N                             | N                                                 |                                | N                                                 |                                | N                                                 |
| CC1262      | SSU ribosomal protein S8P                         |      | Y                        | Y                             | N                                                 |                                | N                                                 |                                | N                                                 |
| CC1263      | LSU ribosomal protein L6P                         |      | Y                        | Y                             | N                                                 |                                | Y                                                 | Patchy/Spotty                  | N                                                 |
| CC1264      | LSU ribosomal protein L18P                        |      | Y                        | Y                             | N                                                 |                                | N                                                 |                                | N                                                 |
| CC1265      | SSU ribosomal protein S5P                         |      | Y                        | Y                             | N                                                 |                                | N                                                 |                                | N                                                 |
| CC1266      | LSU ribosomal protein L30P                        |      | Y                        | Y                             | N                                                 |                                | N                                                 |                                | N                                                 |
| CC1267      | LSU ribosomal protein L15P                        |      | Y                        | Y                             | N                                                 |                                | N                                                 |                                | N                                                 |
| CC1268      | Protein translocase subunit secY                  |      | Y                        | Y                             | Y                                                 | Patchy/Spotty                  | N                                                 |                                | N                                                 |
| CC1269      | Adenylate kinase / Nucleoside-diphosphate kinase  |      | Y                        | Y                             | N                                                 |                                | N                                                 |                                | N                                                 |
| CC1270      | SSU ribosomal protein S13P                        |      | Y                        | Y                             | N                                                 |                                | N                                                 |                                | N                                                 |
| CC1271      | SSU ribosomal protein S11P                        |      | Y                        | Y                             | N                                                 |                                | N                                                 |                                | N                                                 |
| CC1272      | DNA-directed RNA polymerase alpha chain           |      | Y                        | N                             | N                                                 |                                | N                                                 |                                | N                                                 |
| CC1273      | LSU ribosomal protein L17P                        |      | Y                        | Y                             | N                                                 |                                | N                                                 |                                | N                                                 |
| CC1274      | Hypothetical protein                              |      | Y                        | Y                             | N                                                 |                                | N                                                 |                                | N                                                 |
| CC1275      | Conserved hypothetical protein                    |      | Y                        | Y                             | N                                                 |                                | Y                                                 | Patchy/Spotty                  | N                                                 |
| CC1276      | Transporter                                       |      | Y                        | Y                             | N                                                 |                                | N                                                 |                                | N                                                 |

| Gene Number | Annotation                                                             | Gene  | Entry Vector Constructed | Entry Vector Sequence Correct | Localized and Sequence-verified C-terminal Fusion | Localization w/ C-terminal Tag | Localized and Sequence-verified N-terminal Fusion | Localization w/ N-terminal Tag | Protein Localized as Both N- or C-terminal Fusion |
|-------------|------------------------------------------------------------------------|-------|--------------------------|-------------------------------|---------------------------------------------------|--------------------------------|---------------------------------------------------|--------------------------------|---------------------------------------------------|
| CC1277      | phosphodiesterase I / nucleotide pyrophosphatase                       |       | Y                        | Y                             | N                                                 |                                | N                                                 |                                | N                                                 |
| CC1278      | GMC family oxidoreductase                                              |       | Y                        | N                             | N                                                 |                                | N                                                 |                                | N                                                 |
| CC1279      | Glyoxalase family protein                                              |       | Y                        | Y                             | N                                                 |                                | N                                                 |                                | N                                                 |
| CC1280      | Transcriptional regulator, ArsR family                                 |       | N                        | N                             | N                                                 |                                | N                                                 |                                | N                                                 |
| CC1281      | Tetracycline resistance protein                                        |       | Y                        | Y                             | N                                                 |                                | N                                                 |                                | N                                                 |
| CC1282      | Endopeptidase degP                                                     |       | Y                        | Y                             | N                                                 |                                | N                                                 |                                | N                                                 |
| CC1283      | ATPase, AAA family                                                     |       | Y                        | Y                             | N                                                 |                                | N                                                 |                                | N                                                 |
| CC1284      | Ribosomal large subunit pseudouridine synthase C                       |       | Y                        | Y                             | N                                                 |                                | N                                                 |                                | N                                                 |
| CC1285      | Conserved hypothetical protein                                         |       | Y                        | Y                             | N                                                 |                                | N                                                 |                                | N                                                 |
| CC1286      | Short chain dehydrogenase                                              |       | Y                        | Y                             | N                                                 |                                | N                                                 |                                | N                                                 |
| CC1287      | Outer membrane protein                                                 |       | Y                        | Y                             | N                                                 |                                | N                                                 |                                | N                                                 |
| CC1288      | Conserved hypothetical protein                                         |       | Y                        | Y                             | N                                                 |                                | N                                                 |                                | N                                                 |
| CC1289      |                                                                        |       | Y                        | Y                             | N                                                 |                                | N                                                 |                                | N                                                 |
| CC1290      | Hypothetical protein                                                   |       | N                        | N                             | N                                                 |                                | N                                                 |                                | N                                                 |
| CC1291      | Transposase                                                            |       | Y                        | N                             | N                                                 |                                | N                                                 |                                | N                                                 |
| CC1292      | Transposase                                                            |       | Y                        | N                             | N                                                 |                                | N                                                 |                                | N                                                 |
| CC1293      | Two-component response regulator protein                               |       | Y                        | Y                             | N                                                 |                                | N                                                 |                                | N                                                 |
| CC1294      | Two component sensor histidine kinase                                  |       | Y                        | N                             | N                                                 |                                | N                                                 |                                | N                                                 |
| CC1295      | 3-phytase / 6-phytase                                                  |       | Y                        | Y                             | N                                                 |                                | N                                                 |                                | N                                                 |
| CC1296      | Myo-inositol 2-dehydrogenase idhA                                      | idhA  | Y                        | Y                             | N                                                 |                                | N                                                 |                                | N                                                 |
| CC1297      | Transcriptional regulator iolR                                         | iolR  | Y                        | Y                             | Y                                                 | Patchy/Spotty                  | Y                                                 | Patchy/Spotty                  | Y                                                 |
| CC1298      | 5-dehydro-2-deoxygluconokinase iolC                                    | iolC  | Y                        | Y                             | N                                                 |                                | N                                                 |                                | N                                                 |
| CC1299      | myo-inositol catabolism protein iolD                                   | iolD  | Y                        | Y                             | N                                                 |                                | N                                                 |                                | N                                                 |
| CC1300      | myo-inositol catabolism protein iolE                                   | iolE  | Y                        | Y                             | N                                                 |                                | N                                                 |                                | N                                                 |
| CC1301      | myo-inositol catabolism protein iolB                                   | iolB  | Y                        | Y                             | N                                                 |                                | N                                                 |                                | N                                                 |
| CC1302      | Malonate-semialdehyde dehydrogenase iolA                               | iolA  | Y                        | Y                             | N                                                 |                                | N                                                 |                                | N                                                 |
| CC1303      | Hypothetical protein                                                   |       | Y                        | Y                             | N                                                 |                                | N                                                 |                                | N                                                 |
| CC1304      | Alkaline phosphatase synthesis two-component response regulator phoP   | phoP  | N                        | N                             | N                                                 |                                | N                                                 |                                | N                                                 |
| CC1305      | Sensor protein phoQ                                                    | phoQ  | Y                        | Y                             | N                                                 |                                | N                                                 |                                | N                                                 |
| CC1306      | NIFR3-like protein                                                     |       | Y                        | Y                             | N                                                 |                                | N                                                 |                                | N                                                 |
| CC1307      | Aspartyl protease perP                                                 | perP  | Y                        | Y                             | N                                                 |                                | N                                                 |                                | N                                                 |
| CC1308      | Putative Fe-S protein                                                  |       | Y                        | Y                             | N                                                 |                                | N                                                 |                                | N                                                 |
| CC1309      | Nicotinate-nucleotide--dimethylbenzimidazole phosphoribosyltransferase |       | Y                        | Y                             | N                                                 |                                | N                                                 |                                | N                                                 |
| CC1310      | Acyl-CoA dehydrogenase                                                 |       | Y                        | Y                             | N                                                 |                                | N                                                 |                                | N                                                 |
| CC1311      | Acyl-CoA dehydrogenase, short-chain specific                           |       | Y                        | N                             | N                                                 |                                | N                                                 |                                | N                                                 |
| CC1312      | Hypothetical protein                                                   |       | Y                        | Y                             | N                                                 |                                | N                                                 |                                | N                                                 |
| CC1313      | Lysine decarboxylase family                                            |       | Y                        | Y                             | N                                                 |                                | N                                                 |                                | N                                                 |
| CC1314      | Putative ABC transporter C8C9.18 in chromosome I                       |       | N                        | N                             | N                                                 |                                | N                                                 |                                | N                                                 |
| CC1315      | Lactoylglutathione lyase                                               |       | Y                        | Y                             | N                                                 |                                | N                                                 |                                | N                                                 |
| CC1316      | Glutathione S-transferase                                              |       | Y                        | Y                             | N                                                 |                                | N                                                 |                                | N                                                 |
| CC1317      | Protein-L-isoaspartate O-methyltransferase                             |       | Y                        | Y                             | N                                                 |                                | N                                                 |                                | N                                                 |
| CC1318      | Type I secretion outer membrane protein                                |       |                          |                               |                                                   |                                |                                                   |                                |                                                   |
| CC1318      | rsaFb                                                                  | rsaFb | Y                        | Y                             | Y                                                 | Patchy/Spotty                  | N                                                 |                                | N                                                 |
| CC1319      | pole-organizing protein popZ                                           | popZ  | Y                        | Y                             | Y                                                 | Bipolar and Unipolar           | Y                                                 | Bipolar and Unipolar           | Y                                                 |
| CC1320      | Valyl-tRNA synthetase                                                  |       | N                        | N                             | N                                                 |                                | N                                                 |                                | N                                                 |
| CC1321      | Long-chain-fatty-acid--CoA ligase                                      |       | Y                        | Y                             | N                                                 |                                | N                                                 |                                | N                                                 |
| CC1322      | Conserved hypothetical protein                                         |       | Y                        | Y                             | N                                                 |                                | N                                                 |                                | N                                                 |

| Gene Number | Annotation                                                                              | Gene | Entry Vector Constructed | Entry Vector Sequence Correct | Localized and Sequence-verified C-terminal Fusion | Localization w/ C-terminal Tag | Localized and Sequence-verified N-terminal Fusion | Localization w/ N-terminal Tag | Protein Localized as Both N- or C-terminal Fusion |
|-------------|-----------------------------------------------------------------------------------------|------|--------------------------|-------------------------------|---------------------------------------------------|--------------------------------|---------------------------------------------------|--------------------------------|---------------------------------------------------|
| CC1323      | Amidase family protein<br>Putative cell adhesion protein (contact                       |      | Y                        | N                             | N                                                 |                                | N                                                 |                                | N                                                 |
| CC1324      | hemolysin TlyA-related)                                                                 |      | N                        | N                             | N                                                 |                                | N                                                 |                                | N                                                 |
| CC1325      | Conserved hypothetical protein                                                          |      | Y                        | Y                             | Y                                                 | Patchy/Spotty                  | N                                                 |                                | N                                                 |
| CC1326      | tRNA (Uracil-5-) -methyltransferase                                                     |      | Y                        | Y                             | N                                                 |                                | N                                                 |                                | N                                                 |
| CC1327      | Methyltransferase                                                                       |      | Y                        | N                             | N                                                 |                                | N                                                 |                                | N                                                 |
| CC1328      | Acetyltransferase                                                                       |      | Y                        | Y                             | N                                                 |                                | N                                                 |                                | N                                                 |
| CC1329      | RNA polymerase sigma factor                                                             |      | Y                        | Y                             | N                                                 |                                | N                                                 |                                | N                                                 |
| CC1330      | Radical SAM superfamily protein<br>Glycosyltransferase involved in cell wall            |      | Y                        | Y                             | N                                                 |                                | Y                                                 | Middle OR Pole                 | N                                                 |
| CC1331      | biogenesis                                                                              |      | Y                        | Y                             | N                                                 |                                | N                                                 |                                | N                                                 |
| CC1332      | Soluble lytic murein transglycosylase                                                   |      | Y                        | N                             | N                                                 |                                | N                                                 |                                | N                                                 |
| CC1333      | Uracil DNA glycosylase superfamily protein<br>Electron transfer flavoprotein-ubiquinone |      | N                        | N                             | N                                                 |                                | N                                                 |                                | N                                                 |
| CC1334      | oxidoreductase                                                                          |      | Y                        | Y                             | Y                                                 | Patchy/Spotty                  | Y                                                 | Patchy/Spotty                  | Y                                                 |
| CC1335      | Tetratricopeptide repeat family protein<br>4-diphosphocytidyl-2-C-methyl-D-erythritol   |      | Y                        | Y                             | N                                                 |                                | N                                                 |                                | N                                                 |
| CC1336      | kinase                                                                                  |      | Y                        | Y                             | N                                                 |                                | N                                                 |                                | N                                                 |
| CC1337      | Peptidyl-prolyl cis-trans isomerase<br>Ammonium transporter / Methylammonium            |      | N                        | N                             | N                                                 |                                | N                                                 |                                | N                                                 |
| CC1338      | transporter                                                                             |      | Y                        | N                             | N                                                 |                                | N                                                 |                                | N                                                 |
| CC1339      | Nitrogen regulatory protein GlnK                                                        |      | Y                        | N                             | N                                                 |                                | N                                                 |                                | N                                                 |
| CC1340      | Hypothetical protein                                                                    |      | N                        | N                             | N                                                 |                                | N                                                 |                                | N                                                 |
| CC1341      | Glycyl-tRNA synthetase alpha chain                                                      |      | Y                        | Y                             | N                                                 |                                | N                                                 |                                | N                                                 |
| CC1342      | Glycyl-tRNA synthetase beta chain                                                       |      | Y                        | Y                             | N                                                 |                                | N                                                 |                                | N                                                 |
| CC1343      | Hypothetical cytosolic protein                                                          |      | N                        | N                             | N                                                 |                                | N                                                 |                                | N                                                 |
| CC1344      | Predicted metal-dependent hydrolase                                                     |      | Y                        | Y                             | N                                                 |                                | N                                                 |                                | N                                                 |
| CC1345      | hypothetical protein<br>Phosphohydrolase (MutT/nudix family                             |      | Y                        | N                             | N                                                 |                                | N                                                 |                                | N                                                 |
| CC1346      | protein)                                                                                |      | Y                        | Y                             | N                                                 |                                | Y                                                 | Middle OR Pole                 | N                                                 |
| CC1347      | Delta-aminolevulinic acid dehydratase                                                   |      | Y                        | Y                             | N                                                 |                                | N                                                 |                                | N                                                 |
| CC1348      | Cyclohexanone monooxygenase                                                             |      | Y                        | Y                             | N                                                 |                                | Y                                                 | Middle OR Pole                 | N                                                 |
| CC1349      | hypothetical protein<br>Acyl-CoA dehydrogenase, short-chain                             |      | Y                        | Y                             | N                                                 |                                | N                                                 |                                | N                                                 |
| CC1350      | specific                                                                                |      | N                        | N                             | N                                                 |                                | N                                                 |                                | N                                                 |
| CC1351      | Phosphoglycerate mutase family protein                                                  |      | Y                        | Y                             | N                                                 |                                | N                                                 |                                | N                                                 |
| CC1352      | 3-hydroxyisobutyryl-CoA hydrolase                                                       |      | Y                        | Y                             | N                                                 |                                | N                                                 |                                | N                                                 |
| CC1353      | Methyltransferase                                                                       |      | Y                        | Y                             | N                                                 |                                | N                                                 |                                | N                                                 |
| CC1354      | 3-hydroxyisobutyrate dehydrogenase                                                      |      | Y                        | Y                             | N                                                 |                                | N                                                 |                                | N                                                 |
| CC1355      | 5-aminolevulinic acid synthase                                                          |      | Y                        | Y                             | N                                                 |                                | N                                                 |                                | N                                                 |
| CC1356      | Transcriptional regulator                                                               |      | Y                        | Y                             | Y                                                 | Patchy/Spotty                  | N                                                 |                                | N                                                 |
| CC1357      | Serine hydroxymethyltransferase                                                         |      | Y                        | Y                             | N                                                 |                                | N                                                 |                                | N                                                 |
| CC1358      | Putative regulatory protein                                                             |      | Y                        | Y                             | Y                                                 | Middle OR Pole                 | Y                                                 | Pole                           | Y                                                 |
| CC1359      | 6,7-dimethyl-8-ribityllumazine synthase                                                 |      | Y                        | Y                             | N                                                 |                                | N                                                 |                                | N                                                 |
| CC1360      | N utilization substance protein B                                                       |      | Y                        | Y                             | N                                                 |                                | N                                                 |                                | N                                                 |
| CC1361      | Thiamine-monophosphate kinase                                                           |      | Y                        | N                             | N                                                 |                                | N                                                 |                                | N                                                 |
| CC1362      | hypothetical protein                                                                    |      | Y                        | Y                             | N                                                 |                                | N                                                 |                                | N                                                 |
| CC1363      | H <sup>+</sup> translocating pyrophosphatase                                            |      | Y                        | Y                             | N                                                 |                                | N                                                 |                                | N                                                 |
| CC1364      | Chemotaxis receiver domain protein cheYIII                                              |      | Y                        | Y                             | N                                                 |                                | N                                                 |                                | N                                                 |
| CC1365      | Lipoprotein (SmpA/OmlA family)<br>Ubiquinol-cytochrome C reductase                      |      | Y                        | Y                             | Y                                                 | Patchy/Spotty                  | N                                                 |                                | N                                                 |
| CC1366      | chaperone                                                                               |      | Y                        | Y                             | N                                                 |                                | N                                                 |                                | N                                                 |
| CC1367      | Hypothetical protein                                                                    |      | Y                        | Y                             | N                                                 |                                | N                                                 |                                | N                                                 |

| Gene Number | Annotation                                                           | Gene | Entry Vector Constructed | Entry Vector Sequence Correct | Localized and Sequence-verified C-terminal Fusion | Localization w/ C-terminal Tag | Localized and Sequence-verified N-terminal Fusion | Localization w/ N-terminal Tag | Protein Localized as Both N- or C-terminal Fusion |
|-------------|----------------------------------------------------------------------|------|--------------------------|-------------------------------|---------------------------------------------------|--------------------------------|---------------------------------------------------|--------------------------------|---------------------------------------------------|
| CC1368      | Fatty acid/phospholipid synthesis protein plsX                       |      | Y                        | Y                             | N                                                 |                                | Y                                                 | Pole                           | N                                                 |
| CC1369      | 3-oxoacyl-[acyl-carrier-protein] synthase III                        |      | Y                        | Y                             | N                                                 |                                | N                                                 |                                | N                                                 |
| CC1370      | Integration host factor alpha-subunit                                |      | Y                        | Y                             | N                                                 |                                | N                                                 |                                | N                                                 |
| CC1371      | Transcriptional regulator, MerR family                               |      | Y                        | Y                             | N                                                 |                                | N                                                 |                                | N                                                 |
| CC1372      | Hypothetical protein                                                 |      | Y                        | Y                             | N                                                 |                                | N                                                 |                                | N                                                 |
| CC1373      | Transglycosylase associated protein                                  |      | Y                        | Y                             | N                                                 |                                | N                                                 |                                | N                                                 |
| CC1374      | Heme O monooxygenase (ferredoxin)                                    |      | Y                        | N                             | N                                                 |                                | N                                                 |                                | N                                                 |
| CC1375      | dTDP-glucose 4,6-dehydratase                                         |      | Y                        | Y                             | N                                                 |                                | N                                                 |                                | N                                                 |
| CC1376      | LSU ribosomal protein L13P                                           |      | Y                        | Y                             | N                                                 |                                | N                                                 |                                | N                                                 |
| CC1377      | SSU ribosomal protein S9P                                            |      | Y                        | Y                             | N                                                 |                                | N                                                 |                                | N                                                 |
| CC1378      | N-acetyl-gamma-glutamyl-phosphate reductase                          |      | Y                        | Y                             | N                                                 |                                | N                                                 |                                | N                                                 |
| CC1379      | Hypothetical protein                                                 |      | N                        | N                             | N                                                 |                                | N                                                 |                                | N                                                 |
| CC1380      | Poly(3-hydroxyalkanoate) polymerase                                  |      | Y                        | Y                             | Y                                                 | Central - Focus                | Y                                                 | Central - Focus                | Y                                                 |
| CC1381      | Hypothetical protein                                                 |      | Y                        | Y                             | N                                                 |                                | N                                                 |                                | N                                                 |
| CC1382      | Putative aminotransferase aatC                                       |      | Y                        | Y                             | N                                                 |                                | N                                                 |                                | N                                                 |
| CC1383      | Homoserine dehydrogenase                                             |      | Y                        | Y                             | N                                                 |                                | N                                                 |                                | N                                                 |
| CC1384      | Fructose-1,6-bisphosphatase                                          | glpX | Y                        | Y                             | N                                                 |                                | N                                                 |                                | N                                                 |
| CC1385      | Fructose-1,6-bisphosphatase                                          |      | Y                        | Y                             | N                                                 |                                | N                                                 |                                | N                                                 |
| CC1386      | Single-stranded-DNA-specific exonuclease recJ                        | recJ | Y                        | Y                             | N                                                 |                                | N                                                 |                                | N                                                 |
| CC1387      | Cold shock protein cspD                                              | cspD | Y                        | Y                             | N                                                 |                                | N                                                 |                                | N                                                 |
| CC1388      | Hypothetical protein                                                 |      | Y                        | Y                             | N                                                 |                                | N                                                 |                                | N                                                 |
| CC1389      | Electron transport complex I subunit, NADH-ubiquinone oxidoreductase |      | Y                        | Y                             | N                                                 |                                | N                                                 |                                | N                                                 |
| CC1390      | tRNA-Arg-TCT                                                         |      | Y                        | Y                             | N                                                 |                                | N                                                 |                                | N                                                 |
| CC1391      | Hypothetical protein                                                 |      | Y                        | Y                             | N                                                 |                                | N                                                 |                                | N                                                 |
| CC1392      | Hypothetical protein                                                 |      | Y                        | Y                             | N                                                 |                                | N                                                 |                                | N                                                 |
| CC1393      | Hypothetical protein                                                 |      | Y                        | Y                             | N                                                 |                                | N                                                 |                                | N                                                 |
| CC1394      | Hypothetical protein                                                 |      | Y                        | N                             | N                                                 |                                | N                                                 |                                | N                                                 |
| CC1395      | Hypothetical protein                                                 |      | Y                        | Y                             | N                                                 |                                | N                                                 |                                | N                                                 |
| CC1396      | Lactate 2-monooxygenase                                              |      | Y                        | Y                             | N                                                 |                                | N                                                 |                                | N                                                 |
| CC1397      | 3-deoxy-7-phosphoheptulonate synthase                                |      | Y                        | N                             | N                                                 |                                | N                                                 |                                | N                                                 |
| CC1398      | Hypothetical protein                                                 |      | Y                        | Y                             | N                                                 |                                | N                                                 |                                | N                                                 |
| CC1399      | Methyl-accepting chemotaxis protein                                  |      | Y                        | Y                             | N                                                 |                                | N                                                 |                                | N                                                 |
| CC1400      | Hypothetical protein                                                 |      | Y                        | Y                             | N                                                 |                                | N                                                 |                                | N                                                 |
| CC1401      | Cytochrome cbb3 oxidase subunit I ccoN                               | ccoN | Y                        | Y                             | Y                                                 | Patchy/Spotty                  | N                                                 |                                | N                                                 |
| CC1402      | Cytochrome cbb3 oxidase, cytochrome c subunit ccoO                   | ccoO | Y                        | Y                             | N                                                 |                                | N                                                 |                                | N                                                 |
| CC1403      | Cytochrome cbb3 oxidase, subunit ccoQ                                | ccoQ | Y                        | Y                             | N                                                 |                                | N                                                 |                                | N                                                 |
| CC1404      | Cytochrome cbb3 oxidase, diheme subunit, membrane-bound ccoP         | ccoP | Y                        | Y                             | N                                                 |                                | N                                                 |                                | N                                                 |
| CC1405      | Polyferredoxin protein fixG                                          | fixG | Y                        | Y                             | Y                                                 | Patchy/Spotty                  | Y                                                 | Patchy/Spotty                  | Y                                                 |
| CC1406      | Cation pump-linked membrane protein fixH                             | fixH | Y                        | Y                             | N                                                 |                                | N                                                 |                                | N                                                 |
| CC1407      | E1-E2 cation pump ATPase fixI                                        | fixI | Y                        | Y                             | N                                                 |                                | Y                                                 | Patchy/Spotty                  | N                                                 |
| CC1408      | Cytochrome cbb3 oxidase maturation protein ccoS                      | ccoS | Y                        | Y                             | N                                                 |                                | N                                                 |                                | N                                                 |
| CC1409      | OmpW family outer membrane protein ompW                              | ompW | Y                        | Y                             | N                                                 |                                | N                                                 |                                | N                                                 |
| CC1410      | GRP-family transcription regulator ftrB                              | ftrB | Y                        | Y                             | N                                                 |                                | N                                                 |                                | N                                                 |
| CC1411      | Oxygen-independent coproporphyrinogen-III oxidase hemN               | hemN | Y                        | Y                             | N                                                 |                                | N                                                 |                                | N                                                 |
| CC1412      | Transcriptional regulator                                            |      | Y                        | Y                             | N                                                 |                                | N                                                 |                                | N                                                 |
| CC1413      | Tetratricopeptide repeat family protein                              |      | Y                        | Y                             | N                                                 |                                | Y                                                 | Patchy/Spotty                  | N                                                 |

| Gene Number | Annotation                                    | Gene | Entry Vector Constructed | Entry Vector Sequence Correct | Localized and Sequence-verified C-terminal Fusion | Localization w/ C-terminal Tag | Localized and Sequence-verified N-terminal Fusion | Localization w/ N-terminal Tag | Protein Localized as Both N- or C-terminal Fusion |
|-------------|-----------------------------------------------|------|--------------------------|-------------------------------|---------------------------------------------------|--------------------------------|---------------------------------------------------|--------------------------------|---------------------------------------------------|
| CC1414      | Hypothetical protein                          |      | Y                        | Y                             | N                                                 |                                | N                                                 |                                | N                                                 |
| CC1415      | Conserved hypothetical protein                |      | Y                        | Y                             | N                                                 |                                | N                                                 |                                | N                                                 |
| CC1416      |                                               |      | Y                        | Y                             | N                                                 |                                | N                                                 |                                | N                                                 |
| CC1417      | Hypothetical protein                          |      | Y                        | Y                             | N                                                 |                                | N                                                 |                                | N                                                 |
| CC1418      | Aldose 1-epimerase                            |      | Y                        | Y                             | N                                                 |                                | N                                                 |                                | N                                                 |
| CC1419      | Hypothetical protein                          |      | Y                        | Y                             | N                                                 |                                | Y                                                 | Middle OR Pole                 | N                                                 |
| CC1420      | Transcriptional regulator, GntR family        |      | Y                        | Y                             | N                                                 |                                | Y                                                 | Central - Focus                | N                                                 |
| CC1421      | Galactonate dehydratase                       |      | Y                        | Y                             | N                                                 |                                | N                                                 |                                | N                                                 |
| CC1422      | Alpha-L-arabinofuranosidase                   |      | Y                        | Y                             | N                                                 |                                | N                                                 |                                | N                                                 |
| CC1423      | NAD(FAD)-utilizing dehydrogenases             |      | Y                        | Y                             | N                                                 |                                | N                                                 |                                | N                                                 |
| CC1424      | Cystathionine beta-lyase                      |      | Y                        | N                             | N                                                 |                                | N                                                 |                                | N                                                 |
| CC1425      | 3-mercaptopyruvate sulfurtransferase          |      | Y                        | Y                             | N                                                 |                                | N                                                 |                                | N                                                 |
| CC1426      | Cysteine synthase                             |      | Y                        | Y                             | N                                                 |                                | N                                                 |                                | N                                                 |
| CC1427      | Cyclopropane-fatty-acyl-phospholipid synthase |      | Y                        | Y                             | N                                                 |                                | N                                                 |                                | N                                                 |
| CC1428      | Deoxyribodipyrimidine photolyase              |      | Y                        | Y                             | N                                                 |                                | N                                                 |                                | N                                                 |
| CC1429      | 2-dehydro-3-deoxyphosphooctonate aldolase     |      | Y                        | Y                             | N                                                 |                                | N                                                 |                                | N                                                 |
| CC1430      | ADP-L-glycero-D-manno-heptose-6-epimerase     |      | Y                        | Y                             | N                                                 |                                | Y                                                 | Varied Focus                   | N                                                 |
| CC1431      | DNA-dependent DNA polymerase III alpha chain  |      | Y                        | Y                             | N                                                 |                                | Y                                                 | Middle OR Pole                 | N                                                 |
| CC1432      | Acetyl-CoA acetyltransferase                  |      | Y                        | Y                             | N                                                 |                                | N                                                 |                                | N                                                 |
| CC1433      | Conserved hypothetical protein                |      | N                        | N                             | N                                                 |                                | N                                                 |                                | N                                                 |
| CC1434      | Protein kinase C-like superfamily protein     |      | Y                        | Y                             | N                                                 |                                | N                                                 |                                | N                                                 |
| CC1435      | Phosphotransferase family protein             |      | Y                        | N                             | N                                                 |                                | N                                                 |                                | N                                                 |
| CC1436      | Conserved membrane spanning protein           |      | Y                        | N                             | N                                                 |                                | N                                                 |                                | N                                                 |
| CC1437      | ATP-dependent DNA helicase recG               |      | N                        | N                             | N                                                 |                                | N                                                 |                                | N                                                 |
| CC1438      | Hypothetical protein                          |      | Y                        | Y                             | Y                                                 | MidBand                        | Y                                                 | MidBand                        | Y                                                 |
| CC1439      | Cystine transport ATP-binding protein         |      | Y                        | Y                             | N                                                 |                                | N                                                 |                                | N                                                 |
| CC1440      | Cystine transport system permease protein     |      | Y                        | Y                             | N                                                 |                                | N                                                 |                                | N                                                 |
| CC1441      | Cystine-binding protein                       |      | Y                        | Y                             | N                                                 |                                | N                                                 |                                | N                                                 |
| CC1442      | 3-oxoacyl-[acyl-carrier-protein] synthase III |      | Y                        | Y                             | N                                                 |                                | N                                                 |                                | N                                                 |
| CC1443      | Hypothetical protein                          |      | Y                        | Y                             | N                                                 |                                | N                                                 |                                | N                                                 |
| CC1444      | Sterol desaturase family protein              |      | Y                        | Y                             | N                                                 |                                | N                                                 |                                | N                                                 |
| CC1445      | Hypothetical protein                          |      | Y                        | Y                             | N                                                 |                                | N                                                 |                                | N                                                 |
| CC1446      | C4-dicarboxylate-binding protein              |      | Y                        | Y                             | N                                                 |                                | N                                                 |                                | N                                                 |
| CC1447      | DICARBOXYLATE TRANSPORTER                     |      | Y                        | Y                             | N                                                 |                                | N                                                 |                                | N                                                 |
| CC1448      | C4-dicarboxylate transporter large subunit    |      | Y                        | Y                             | N                                                 |                                | N                                                 |                                | N                                                 |
| CC1449      | NAD(P)H-dependent quinone reductase           |      | Y                        | Y                             | N                                                 |                                | N                                                 |                                | N                                                 |
| CC1450      | Hypothetical protein                          |      | Y                        | Y                             | N                                                 |                                | N                                                 |                                | N                                                 |
| CC1451      | Hypothetical protein                          |      | Y                        | Y                             | N                                                 |                                | N                                                 |                                | N                                                 |
| CC1452      | Universal stress protein family               |      | Y                        | N                             | N                                                 |                                | N                                                 |                                | N                                                 |
| CC1453      | Conserved hypothetical protein                |      | Y                        | Y                             | N                                                 |                                | N                                                 |                                | N                                                 |
| CC1454      | Hypothetical exported protein                 |      | Y                        | Y                             | N                                                 |                                | N                                                 |                                | N                                                 |
| CC1455      | ATP-dependent protease subunit                |      | Y                        | Y                             | N                                                 |                                | N                                                 |                                | N                                                 |
| CC1456      | Acetyltransferase                             |      | Y                        | Y                             | N                                                 |                                | N                                                 |                                | N                                                 |
| CC1457      | FibA protein                                  |      | Y                        | Y                             | N                                                 |                                | N                                                 |                                | N                                                 |
| CC1458      | FibT protein                                  |      | Y                        | Y                             | N                                                 |                                | N                                                 |                                | N                                                 |
| CC1459      | FlaF protein                                  |      | N                        | N                             | N                                                 |                                | N                                                 |                                | N                                                 |
| CC1460      | Flagellin                                     |      | Y                        | Y                             | N                                                 |                                | N                                                 |                                | N                                                 |
| CC1461      | Flagellin                                     |      | Y                        | N                             | N                                                 |                                | N                                                 |                                | N                                                 |
| CC1462      | Hypothetical protein                          |      | Y                        | Y                             | N                                                 |                                | Y                                                 | Pole                           | N                                                 |
| CC1463      | Flagellin                                     |      | Y                        | Y                             | N                                                 |                                | N                                                 |                                | N                                                 |

| Gene Number | Annotation                                                                     | Gene | Entry Vector Constructed | Entry Vector Sequence Correct | Localized and Sequence-verified C-terminal Fusion | Localization w/ C-terminal Tag | Localized and Sequence-verified N-terminal Fusion | Localization w/ N-terminal Tag | Protein Localized as Both N- or C-terminal Fusion |
|-------------|--------------------------------------------------------------------------------|------|--------------------------|-------------------------------|---------------------------------------------------|--------------------------------|---------------------------------------------------|--------------------------------|---------------------------------------------------|
| CC1464      | Acetyltransferase                                                              |      | Y                        | Y                             | N                                                 |                                | N                                                 |                                | N                                                 |
| CC1465      | Regulatory protein flaY                                                        |      | Y                        | Y                             | N                                                 |                                | N                                                 |                                | N                                                 |
| CC1466      | Hypothetical protein                                                           |      | Y                        | Y                             | N                                                 |                                | N                                                 |                                | N                                                 |
| CC1467      | Hypothetical protein                                                           |      | Y                        | Y                             | N                                                 |                                | N                                                 |                                | N                                                 |
| CC1468      | Single-strand DNA binding protein                                              |      | Y                        | Y                             | N                                                 |                                | N                                                 |                                | N                                                 |
| CC1469      | Hypothetical protein                                                           |      | Y                        | Y                             | N                                                 |                                | N                                                 |                                | N                                                 |
| CC1470      | Acetyltransferase                                                              |      | Y                        | Y                             | N                                                 |                                | N                                                 |                                | N                                                 |
| CC1471      | Pyruvate,phosphate dikinase                                                    |      | Y                        | N                             | N                                                 |                                | N                                                 |                                | N                                                 |
| CC1472      | Pirin                                                                          |      | Y                        | Y                             | N                                                 |                                | N                                                 |                                | N                                                 |
| CC1473      | Hypothetical protein                                                           |      | N                        | N                             | N                                                 |                                | N                                                 |                                | N                                                 |
| CC1474      | Transcriptional regulators, LysR family                                        |      | Y                        | Y                             | N                                                 |                                | N                                                 |                                | N                                                 |
| CC1475      | Ice nucleation protein                                                         |      | Y                        | N                             | N                                                 |                                | N                                                 |                                | N                                                 |
| CC1476      | Chaperone protein dnaK                                                         |      | Y                        | Y                             | N                                                 |                                | N                                                 |                                | N                                                 |
| CC1477      | NAD(FAD)-utilizing dehydrogenases                                              |      | N                        | N                             | N                                                 |                                | N                                                 |                                | N                                                 |
| CC1478      | PHNF PROTEIN                                                                   |      | Y                        | Y                             | N                                                 |                                | Y                                                 | Patchy/Spotty                  | N                                                 |
| CC1479      |                                                                                |      | Y                        | Y                             | N                                                 |                                | N                                                 |                                | N                                                 |
| CC1480      | Methionyl-tRNA synthetase                                                      |      | Y                        | Y                             | N                                                 |                                | N                                                 |                                | N                                                 |
| CC1481      | Transporter                                                                    |      | N                        | N                             | N                                                 |                                | N                                                 |                                | N                                                 |
| CC1482      | Sulfate adenylyltransferase subunit 1 / Adenylylsulfate kinase                 |      | Y                        | Y                             | N                                                 |                                | N                                                 |                                | N                                                 |
| CC1483      | Sulfate adenylyltransferase subunit 2                                          |      | Y                        | Y                             | N                                                 |                                | N                                                 |                                | N                                                 |
| CC1484      | hypothetical protein                                                           |      | Y                        | Y                             | N                                                 |                                | N                                                 |                                | N                                                 |
| CC1485      | polar localization protein tipN                                                |      | N                        | N                             | N                                                 |                                | N                                                 |                                | N                                                 |
| CC1486      | Undecaprenyl-phosphate beta-N-acetyl-D-fucosaminephosphotransferase            |      | Y                        | Y                             | N                                                 |                                | N                                                 |                                | N                                                 |
| CC1487      | D-mannonate oxidoreductase                                                     |      | N                        | N                             | N                                                 |                                | N                                                 |                                | N                                                 |
| CC1488      | Altronate hydrolase                                                            |      | Y                        | Y                             | N                                                 |                                | N                                                 |                                | N                                                 |
| CC1489      | Transcriptional regulator, LacI family                                         |      | Y                        | Y                             | N                                                 |                                | N                                                 |                                | N                                                 |
| CC1490      | Uronate isomerase                                                              |      | Y                        | Y                             | N                                                 |                                | N                                                 |                                | N                                                 |
| CC1491      | 4-deoxy-L-threo-5-hexosulose-uronate ketol-isomerase                           |      | Y                        | Y                             | N                                                 |                                | N                                                 |                                | N                                                 |
| CC1492      | 2-deoxy-D-gluconate 3-dehydrogenase                                            |      | Y                        | Y                             | N                                                 |                                | N                                                 |                                | N                                                 |
| CC1493      | Phosphoenolpyruvate carboxylase                                                |      | N                        | N                             | N                                                 |                                | N                                                 |                                | N                                                 |
| CC1494      | Hypothetical protein                                                           |      | Y                        | Y                             | N                                                 |                                | N                                                 |                                | N                                                 |
| CC1495      | 4-Hydroxy-2-oxoglutarate aldolase / 2-dehydro-3-deoxyphosphogluconate aldolase |      | Y                        | Y                             | N                                                 |                                | N                                                 |                                | N                                                 |
| CC1496      | 2-dehydro-3-deoxygluconokinase                                                 |      | Y                        | Y                             | N                                                 |                                | N                                                 |                                | N                                                 |
| CC1497      |                                                                                |      | Y                        | Y                             | N                                                 |                                | N                                                 |                                | N                                                 |
| CC1498      | Conserved hypothetical protein                                                 |      | Y                        | Y                             | N                                                 |                                | N                                                 |                                | N                                                 |
| CC1499      | Proline iminopeptidase                                                         |      | Y                        | Y                             | N                                                 |                                | N                                                 |                                | N                                                 |
| CC1500      | Na(+)/H(+) antiporter                                                          |      | Y                        | Y                             | N                                                 |                                | N                                                 |                                | N                                                 |
| CC1501      | Hypothetical transcriptional regulatory protein                                |      | N                        | N                             | N                                                 |                                | N                                                 |                                | N                                                 |
| CC1502      | Penicillin-binding protein                                                     |      | Y                        | N                             | N                                                 |                                | N                                                 |                                | N                                                 |
| CC1503      | Arsenate reductase                                                             |      | Y                        | Y                             | N                                                 |                                | N                                                 |                                | N                                                 |
| CC1504      | Aquaporin / Glycerol uptake facilitator protein                                |      | Y                        | Y                             | Y                                                 | Patchy/Spotty                  | Y                                                 | Patchy/Spotty                  | Y                                                 |
| CC1505      | Transcriptional regulator, ArsR family                                         |      | Y                        | Y                             | N                                                 |                                | N                                                 |                                | N                                                 |
| CC1506      | Arsenic resistance protein ArsH                                                |      | Y                        | Y                             | N                                                 |                                | N                                                 |                                | N                                                 |
| CC1507      | Hypothetical exported protein                                                  |      | Y                        | Y                             | N                                                 |                                | N                                                 |                                | N                                                 |
| CC1508      | Transporter                                                                    |      | Y                        | Y                             | N                                                 |                                | N                                                 |                                | N                                                 |
| CC1509      | 2-keto-4-pentenoate hydratase family protein                                   |      | Y                        | Y                             | N                                                 |                                | N                                                 |                                | N                                                 |
| CC1510      | Beta-lactamase repressor                                                       |      | Y                        | Y                             | N                                                 |                                | N                                                 |                                | N                                                 |
| CC1511      | cell wall degradation protein                                                  |      | Y                        | Y                             | N                                                 |                                | N                                                 |                                | N                                                 |
| CC1512      | M15 superfamily membrane peptidase                                             |      | Y                        | Y                             | N                                                 |                                | N                                                 |                                | N                                                 |



| Gene Number | Annotation                                   | Gene        | Entry Vector Constructed | Entry Vector Sequence Correct | Localized and Sequence-verified C-terminal Fusion | Localization w/ C-terminal Tag | Localized and Sequence-verified N-terminal Fusion | Localization w/ N-terminal Tag | Protein Localized as Both N- or C-terminal Fusion |
|-------------|----------------------------------------------|-------------|--------------------------|-------------------------------|---------------------------------------------------|--------------------------------|---------------------------------------------------|--------------------------------|---------------------------------------------------|
| CC1513      | Hypothetical protein                         |             | Y                        | N                             | N                                                 |                                | N                                                 |                                | N                                                 |
| CC1514      | Hypothetical protein                         |             | N                        | N                             | N                                                 |                                | N                                                 |                                | N                                                 |
| CC1515      | Phosphate-binding protein                    |             | Y                        | N                             | N                                                 |                                | N                                                 |                                | N                                                 |
|             | Multimodular transpeptidase-                 |             |                          |                               |                                                   |                                |                                                   |                                |                                                   |
| CC1516      | transglycosylase PBP 1A                      |             | Y                        | N                             | N                                                 |                                | N                                                 |                                | N                                                 |
| CC1517      | Ferrichrome-iron receptor                    |             | Y                        | N                             | N                                                 |                                | N                                                 |                                | N                                                 |
| CC1518      | Transporter                                  |             | Y                        | Y                             | N                                                 |                                | N                                                 |                                | N                                                 |
|             | Hypothetical ABC transporter permease        |             |                          |                               |                                                   |                                |                                                   |                                |                                                   |
| CC1519      | protein                                      |             | Y                        | Y                             | N                                                 |                                | N                                                 |                                | N                                                 |
|             | Hypothetical ABC transporter permease        |             |                          |                               |                                                   |                                |                                                   |                                |                                                   |
| CC1520      | protein                                      |             | Y                        | N                             | N                                                 |                                | N                                                 |                                | N                                                 |
| CC1521      | acyltransferase 3                            |             | N                        | N                             | N                                                 |                                | N                                                 |                                | N                                                 |
| CC1522      | NAD-dependent DNA ligase                     |             | Y                        | Y                             | N                                                 |                                | N                                                 |                                | N                                                 |
| CC1523      | DNA polymerase III alpha subunit             |             | Y                        | Y                             | N                                                 |                                | N                                                 |                                | N                                                 |
|             | SN-glycerol-3-phosphate transport ATP-       |             |                          |                               |                                                   |                                |                                                   |                                |                                                   |
| CC1524      | binding protein <i>ugpC</i>                  |             | Y                        | Y                             | N                                                 |                                | N                                                 |                                | N                                                 |
| CC1525      | Xaa-Pro aminopeptidase                       |             | N                        | N                             | N                                                 |                                | N                                                 |                                | N                                                 |
| CC1526      | Ribosomal protein L11 methyltransferase      |             | Y                        | Y                             | N                                                 |                                | N                                                 |                                | N                                                 |
| CC1527      | Hypothetical protein                         |             | Y                        | Y                             | N                                                 |                                | N                                                 |                                | N                                                 |
| CC1528      | DNA helicase II                              |             | Y                        | Y                             | N                                                 |                                | N                                                 |                                | N                                                 |
| CC1529      | Tryptophan halogenase                        |             | Y                        | Y                             | N                                                 |                                | N                                                 |                                | N                                                 |
| CC1530      | Hypothetical protein                         |             | Y                        | Y                             | N                                                 |                                | N                                                 |                                | N                                                 |
| CC1531      | Hypothetical protein                         |             | Y                        | Y                             | N                                                 |                                | N                                                 |                                | N                                                 |
| CC1532      | Conserved hypothetical protein               |             | Y                        | Y                             | N                                                 |                                | N                                                 |                                | N                                                 |
| CC1533      | Glutathione S-transferase                    |             | Y                        | Y                             | N                                                 |                                | N                                                 |                                | N                                                 |
| CC1534      | Aspartate aminotransferase                   |             | Y                        | Y                             | N                                                 |                                | N                                                 |                                | N                                                 |
| CC1535      | Hypothetical protein                         |             | Y                        | Y                             | N                                                 |                                | N                                                 |                                | N                                                 |
|             | NADPH-dependent FMN reductase family         |             |                          |                               |                                                   |                                |                                                   |                                |                                                   |
| CC1536      | protein                                      |             | Y                        | Y                             | N                                                 |                                | N                                                 |                                | N                                                 |
| CC1537      | Chromosome partitioning protein <i>parA</i>  |             | Y                        | Y                             | Y                                                 | Pole - Indeterminate           | N                                                 |                                | N                                                 |
| CC1538      | Hypothetical membrane spanning protein       |             | Y                        | N                             | N                                                 |                                | N                                                 |                                | N                                                 |
| CC1539      | Transcriptional regulator, TetR family       |             | Y                        | Y                             | N                                                 |                                | N                                                 |                                | N                                                 |
| CC1540      | alkyl sulfatase                              |             | Y                        | Y                             | N                                                 |                                | N                                                 |                                | N                                                 |
| CC1541      | 2-isopropylmalate synthase                   |             | N                        | N                             | N                                                 |                                | N                                                 |                                | N                                                 |
| CC1542      | Transporter, drug/metabolite exporter family |             | Y                        | Y                             | N                                                 |                                | N                                                 |                                | N                                                 |
| CC1543      | Rod shape-determining protein <i>mreB</i>    | <i>mreB</i> | Y                        | Y                             | N                                                 |                                | Y                                                 | Patchy/Spotty                  | N                                                 |
| CC1544      | Rod shape-determining protein <i>mreC</i>    | <i>mreC</i> | Y                        | Y                             | N                                                 |                                | Y                                                 | Patchy/Spotty                  | N                                                 |
| CC1545      | Conserved hypothetical protein               |             | Y                        | Y                             | N                                                 |                                | N                                                 |                                | N                                                 |
| CC1546      | Cell elongation specific D,D-transpeptidase  |             | Y                        | Y                             | N                                                 |                                | Y                                                 | Patchy/Spotty                  | N                                                 |
| CC1547      | Rod shape-determining protein <i>rodA</i>    | <i>rodA</i> | N                        | N                             | N                                                 |                                | N                                                 |                                | N                                                 |
| CC1548      | Acetyltransferase                            |             | Y                        | N                             | N                                                 |                                | N                                                 |                                | N                                                 |
| CC1549      | Uracil-DNA glycosylase                       |             | Y                        | Y                             | N                                                 |                                | N                                                 |                                | N                                                 |
| CC1550      | Hypothetical cytosolic protein               |             | Y                        | Y                             | N                                                 |                                | N                                                 |                                | N                                                 |
|             | 2-amino-4-hydroxy-6-                         |             |                          |                               |                                                   |                                |                                                   |                                |                                                   |
|             | hydroxymethylidihydropteridine               |             |                          |                               |                                                   |                                |                                                   |                                |                                                   |
| CC1551      | pyrophosphokinase                            |             | Y                        | Y                             | N                                                 |                                | N                                                 |                                | N                                                 |
| CC1552      | DNA-directed RNA polymerase omega chain      |             | Y                        | Y                             | N                                                 |                                | Y                                                 | Middle OR Pole                 | N                                                 |
| CC1553      | ppGpp hydrolase-synthetase <i>relA/spoT</i>  | <i>spoT</i> | Y                        | Y                             | Y                                                 | Middle OR Pole                 | Y                                                 | Middle OR Pole                 | Y                                                 |
|             | Phosphohydrolase (MutT/nudix family          |             |                          |                               |                                                   |                                |                                                   |                                |                                                   |
| CC1554      | protein)                                     |             | Y                        | Y                             | N                                                 |                                | N                                                 |                                | N                                                 |
| CC1555      | Orotate phosphoribosyltransferase            |             | Y                        | N                             | N                                                 |                                | N                                                 |                                | N                                                 |
| CC1556      | Aminobenzoyl-glutamate utilization protein B |             | Y                        | Y                             | N                                                 |                                | N                                                 |                                | N                                                 |

| Gene Number | Annotation                                                 | Gene | Entry Vector Constructed | Entry Vector Sequence Correct | Localized and Sequence-verified C-terminal Fusion | Localization w/ C-terminal Tag | Localized and Sequence-verified N-terminal Fusion | Localization w/ N-terminal Tag | Protein Localized as Both N- or C-terminal Fusion |
|-------------|------------------------------------------------------------|------|--------------------------|-------------------------------|---------------------------------------------------|--------------------------------|---------------------------------------------------|--------------------------------|---------------------------------------------------|
| CC1557      | Pyridoxal phosphate biosynthetic protein pdxJ              |      | Y                        | Y                             | N                                                 |                                | N                                                 |                                | N                                                 |
| CC1558      | Holo-[acyl-carrier protein] synthase                       |      | Y                        | Y                             | N                                                 |                                | N                                                 |                                | N                                                 |
| CC1559      | Signal peptidase I                                         |      | Y                        | Y                             | N                                                 |                                | N                                                 |                                | N                                                 |
| CC1560      | Ribonuclease III                                           |      | Y                        | N                             | N                                                 |                                | N                                                 |                                | N                                                 |
| CC1561      | Hypothetical protein                                       |      | Y                        | Y                             | N                                                 |                                | N                                                 |                                | N                                                 |
| CC1562      | GTP-binding protein era                                    |      | Y                        | Y                             | N                                                 |                                | N                                                 |                                | N                                                 |
| CC1563      | N-hydroxyarylamine O-acetyltransferase                     |      | Y                        | Y                             | N                                                 |                                | N                                                 |                                | N                                                 |
| CC1564      | DNA repair protein recO                                    |      | Y                        | Y                             | N                                                 |                                | N                                                 |                                | N                                                 |
| CC1565      | Alkaline phosphatase                                       |      | N                        | N                             | N                                                 |                                | N                                                 |                                | N                                                 |
| CC1566      | Topoisomerase IV subunit A                                 |      | Y                        | Y                             | N                                                 |                                | Y                                                 | Patchy/Spotty                  | N                                                 |
| CC1567      | Beta-lactamase family protein                              |      | Y                        | Y                             | N                                                 |                                | N                                                 |                                | N                                                 |
| CC1568      | Beta-lactamase family protein                              |      | Y                        | Y                             | N                                                 |                                | N                                                 |                                | N                                                 |
| CC1569      | Quinone oxidoreductase                                     |      | N                        | N                             | N                                                 |                                | N                                                 |                                | N                                                 |
| CC1570      | 2-Nitropropane dioxygenase family protein                  |      | Y                        | N                             | N                                                 |                                | N                                                 |                                | N                                                 |
| CC1571      | Gluconate 5-dehydrogenase                                  |      | Y                        | Y                             | N                                                 |                                | N                                                 |                                | N                                                 |
| CC1572      | Arginine-tRNA-protein transferase                          |      | Y                        | Y                             | N                                                 |                                | N                                                 |                                | N                                                 |
| CC1573      | Chemotaxis motB protein                                    |      | Y                        | Y                             | N                                                 |                                | N                                                 |                                | N                                                 |
| CC1574      | 3-hydroxyisobutyrate dehydrogenase                         |      | Y                        | Y                             | N                                                 |                                | N                                                 |                                | N                                                 |
| CC1575      | Dethiobiotin synthetase                                    |      | N                        | N                             | N                                                 |                                | N                                                 |                                | N                                                 |
| CC1576      | 8-amino-7-oxononanoate synthase                            |      | Y                        | Y                             | N                                                 |                                | N                                                 |                                | N                                                 |
| CC1577      | Adenosylmethionine-8-amino-7-oxononanoate aminotransferase |      | Y                        | Y                             | N                                                 |                                | N                                                 |                                | N                                                 |
| CC1578      | Transporter, drug/metabolite exporter family               |      | Y                        | Y                             | N                                                 |                                | N                                                 |                                | N                                                 |
| CC1579      | Superoxide dismutase [Cu-Zn]                               |      | Y                        | Y                             | N                                                 |                                | N                                                 |                                | N                                                 |
| CC1580      | DNA gyrase subunit A                                       |      | N                        | N                             | N                                                 |                                | N                                                 |                                | N                                                 |
| CC1581      | Phosphopantetheine adenyltransferase                       |      | N                        | N                             | N                                                 |                                | N                                                 |                                | N                                                 |
| CC1582      | Peptidyl-prolyl cis-trans isomerase                        |      | Y                        | Y                             | N                                                 |                                | N                                                 |                                | N                                                 |
| CC1583      | Peptidyl-prolyl cis-trans isomerase                        |      | Y                        | Y                             | N                                                 |                                | N                                                 |                                | N                                                 |
| CC1584      | Peptidyl-prolyl cis-trans isomerase                        |      | Y                        | Y                             | N                                                 |                                | Y                                                 | Middle OR Pole                 | N                                                 |
| CC1585      | Endonuclease/Exonuclease/phosphatase family protein        |      | Y                        | Y                             | N                                                 |                                | N                                                 |                                | N                                                 |
| CC1586      | Hypothetical protein                                       |      | Y                        | Y                             | N                                                 |                                | N                                                 |                                | N                                                 |
| CC1587      | S-adenosylmethionine:tRNA ribosyltransferase-isomerase     |      | Y                        | Y                             | N                                                 |                                | N                                                 |                                | N                                                 |
| CC1588      | Queuine tRNA-ribosyltransferase                            |      | Y                        | Y                             | N                                                 |                                | N                                                 |                                | N                                                 |
| CC1589      | Conserved hypothetical protein                             |      | Y                        | Y                             | N                                                 |                                | N                                                 |                                | N                                                 |
| CC1590      | Hypothetical protein                                       |      | N                        | N                             | N                                                 |                                | N                                                 |                                | N                                                 |
| CC1591      | Potassium-transporting ATPase A chain                      |      | Y                        | Y                             | N                                                 |                                | N                                                 |                                | N                                                 |
| CC1592      | Potassium-transporting ATPase B chain                      |      | Y                        | Y                             | N                                                 |                                | N                                                 |                                | N                                                 |
| CC1593      | Potassium-transporting ATPase C chain                      |      | Y                        | Y                             | N                                                 |                                | N                                                 |                                | N                                                 |
| CC1594      | Osmosensitive K+ channel histidine kinase kdpD             |      | N                        | N                             | N                                                 |                                | N                                                 |                                | N                                                 |
| CC1595      | Two-component response regulator kdpE                      |      | Y                        | Y                             | N                                                 |                                | N                                                 |                                | N                                                 |
| CC1596      | Sulfate transport system permease protein cysT             |      | Y                        | Y                             | N                                                 |                                | N                                                 |                                | N                                                 |
| CC1597      | Sulfate transport system permease protein cysW             |      | Y                        | Y                             | N                                                 |                                | N                                                 |                                | N                                                 |
| CC1598      | Sulfate transport ATP-binding protein cysA                 |      | Y                        | Y                             | N                                                 |                                | N                                                 |                                | N                                                 |
| CC1599      | diguanylate receptor protein dgrA                          |      | Y                        | Y                             | N                                                 |                                | N                                                 |                                | N                                                 |
| CC1600      | Transglutaminase-like enzymes, putative cysteine proteases |      | Y                        | Y                             | N                                                 |                                | N                                                 |                                | N                                                 |
| CC1601      | Hypothetical protein                                       |      | Y                        | Y                             | Y                                                 | Middle OR Pole                 | N                                                 |                                | N                                                 |

| Gene Number | Annotation                                                                                      | Gene | Entry Vector Constructed | Entry Vector Sequence Correct | Localized and Sequence-verified C-terminal Fusion | Localization w/ C-terminal Tag | Localized and Sequence-verified N-terminal Fusion | Localization w/ N-terminal Tag | Protein Localized as Both N- or C-terminal Fusion |
|-------------|-------------------------------------------------------------------------------------------------|------|--------------------------|-------------------------------|---------------------------------------------------|--------------------------------|---------------------------------------------------|--------------------------------|---------------------------------------------------|
| CC1602      | Hypothetical cytosolic protein                                                                  |      | Y                        | Y                             | N                                                 |                                | N                                                 |                                | N                                                 |
| CC1603      | Outer membrane protein                                                                          |      | Y                        | Y                             | N                                                 |                                | N                                                 |                                | N                                                 |
| CC1604      | Hypothetical Outer Membrane Protein                                                             |      | N                        | N                             | N                                                 |                                | N                                                 |                                | N                                                 |
| CC1605      | Carboxypeptidase G2 precursor                                                                   |      | Y                        | Y                             | N                                                 |                                | N                                                 |                                | N                                                 |
| CC1606      | Arginine N-succinyltransferase, beta chain<br>Succinylglutamic semialdehyde                     |      | Y                        | Y                             | N                                                 |                                | N                                                 |                                | N                                                 |
| CC1607      | dehydrogenase                                                                                   |      | Y                        | Y                             | N                                                 |                                | N                                                 |                                | N                                                 |
| CC1608      | Succinylarginine dihydrolase                                                                    |      | Y                        | Y                             | N                                                 |                                | N                                                 |                                | N                                                 |
| CC1609      | RimI-like acetyltransferase<br>Hypothetical response regulator receiver                         |      | N                        | N                             | N                                                 |                                | N                                                 |                                | N                                                 |
| CC1610      | protein                                                                                         |      | Y                        | Y                             | N                                                 |                                | N                                                 |                                | N                                                 |
| CC1611      | Hypothetical acetyltransferase                                                                  |      | Y                        | Y                             | N                                                 |                                | N                                                 |                                | N                                                 |
| CC1612      | Phenylalanine-4-hydroxylase                                                                     |      | Y                        | Y                             | N                                                 |                                | N                                                 |                                | N                                                 |
| CC1613      | Hemimethylated DNA-binding protein yccV                                                         |      | Y                        | Y                             | N                                                 |                                | N                                                 |                                | N                                                 |
| CC1614      | Exopolyphosphatase                                                                              |      | N                        | N                             | N                                                 |                                | N                                                 |                                | N                                                 |
| CC1615      | 23S rRNA Um2552 2'-O-methyltransferase                                                          |      | Y                        | Y                             | N                                                 |                                | N                                                 |                                | N                                                 |
| CC1616      | Potassium channel protein                                                                       |      | Y                        | N                             | N                                                 |                                | N                                                 |                                | N                                                 |
| CC1617      | Inosine-5'-monophosphate dehydrogenase                                                          |      | Y                        | Y                             | N                                                 |                                | N                                                 |                                | N                                                 |
| CC1618      | Hypothetical membrane spanning protein                                                          |      | Y                        | Y                             | N                                                 |                                | N                                                 |                                | N                                                 |
| CC1619      | 16S rRNA m(5)C 967 methyltransferase                                                            |      | Y                        | Y                             | N                                                 |                                | N                                                 |                                | N                                                 |
| CC1620      | GMP synthase [glutamine-hydrolyzing]                                                            |      | Y                        | Y                             | N                                                 |                                | N                                                 |                                | N                                                 |
| CC1621      | Transcriptional regulators, LysR family<br>7 beta-(4-<br>carboxybutanamido)cephalosporanic acid |      | Y                        | Y                             | N                                                 |                                | Y                                                 | Patchy/Spotty                  | N                                                 |
| CC1622      | acylase                                                                                         |      | Y                        | Y                             | N                                                 |                                | N                                                 |                                | N                                                 |
| CC1623      | TonB-dependent outer membrane receptor                                                          |      | Y                        | Y                             | N                                                 |                                | N                                                 |                                | N                                                 |
| CC1624      | Aminobenzoyl-glutamate transport protein                                                        |      | Y                        | Y                             | N                                                 |                                | N                                                 |                                | N                                                 |
| CC1625      | Capsule biosynthesis protein capA<br>Cycloisomaltooligosaccharide                               |      | Y                        | Y                             | N                                                 |                                | N                                                 |                                | N                                                 |
| CC1626      | glucanotransferase precursor                                                                    |      | Y                        | Y                             | N                                                 |                                | N                                                 |                                | N                                                 |
| CC1627      | Transcriptional regulator, LacI family                                                          |      | Y                        | Y                             | Y                                                 | Patchy/Spotty                  | Y                                                 | Patchy/Spotty                  | Y                                                 |
| CC1628      | Nucleoside permease NUPG                                                                        |      | Y                        | Y                             | N                                                 |                                | N                                                 |                                | N                                                 |
| CC1629      | Xylose isomerase family protein                                                                 |      | Y                        | Y                             | N                                                 |                                | N                                                 |                                | N                                                 |
| CC1630      | NAD-dependent oxidoreductase                                                                    |      | Y                        | Y                             | N                                                 |                                | N                                                 |                                | N                                                 |
| CC1631      | lolE-related protein                                                                            |      | Y                        | Y                             | N                                                 |                                | N                                                 |                                | N                                                 |
| CC1632      | Cytochrome c                                                                                    |      | Y                        | Y                             | N                                                 |                                | N                                                 |                                | N                                                 |
| CC1633      | Conserved hypothetical protein (1080)                                                           |      | Y                        | Y                             | N                                                 |                                | N                                                 |                                | N                                                 |
| CC1634      | dehydrogluconate dehydrogenase                                                                  |      | Y                        | Y                             | N                                                 |                                | N                                                 |                                | N                                                 |
| CC1635      | Conserved hypothetical protein                                                                  |      | Y                        | Y                             | N                                                 |                                | N                                                 |                                | N                                                 |
| CC1636      | Conserved hypothetical protein                                                                  |      | Y                        | Y                             | N                                                 |                                | N                                                 |                                | N                                                 |
| CC1637      | Hypothetical protein                                                                            |      | N                        | N                             | N                                                 |                                | N                                                 |                                | N                                                 |
| CC1638      | GMC family oxidoreductase                                                                       |      | Y                        | N                             | N                                                 |                                | N                                                 |                                | N                                                 |
| CC1639      | Transcriptional regulator                                                                       |      | Y                        | Y                             | N                                                 |                                | N                                                 |                                | N                                                 |
| CC1640      | Beta-lactamase repressor                                                                        |      | Y                        | Y                             | N                                                 |                                | N                                                 |                                | N                                                 |
| CC1641      | 2'-5' RNA ligase                                                                                |      | Y                        | Y                             | N                                                 |                                | N                                                 |                                | N                                                 |
| CC1642      | Arsenate reductase                                                                              |      | Y                        | Y                             | N                                                 |                                | N                                                 |                                | N                                                 |
| CC1643      | Phosphoglycolate phosphatase                                                                    |      | N                        | N                             | N                                                 |                                | N                                                 |                                | N                                                 |
| CC1644      | Hypothetical protein                                                                            |      | Y                        | Y                             | N                                                 |                                | N                                                 |                                | N                                                 |
| CC1645      | Hypothetical protein<br>Extracytoplasmic function alternative sigma                             |      | Y                        | Y                             | Y                                                 | Patchy/Spotty                  | N                                                 |                                | N                                                 |
| CC1646      | factor                                                                                          |      | Y                        | N                             | N                                                 |                                | N                                                 |                                | N                                                 |
| CC1647      | Hypothetical protein                                                                            |      | N                        | N                             | N                                                 |                                | N                                                 |                                | N                                                 |
| CC1648      | Hypothetical protein                                                                            |      | Y                        | Y                             | N                                                 |                                | N                                                 |                                | N                                                 |

| Gene Number | Annotation                                       | Gene | Entry Vector Constructed | Entry Vector Sequence Correct | Localized and Sequence-verified C-terminal Fusion | Localization w/ C-terminal Tag | Localized and Sequence-verified N-terminal Fusion | Localization w/ N-terminal Tag | Protein Localized as Both N- or C-terminal Fusion |
|-------------|--------------------------------------------------|------|--------------------------|-------------------------------|---------------------------------------------------|--------------------------------|---------------------------------------------------|--------------------------------|---------------------------------------------------|
| CC1649      | RNA polymerase sigma-E factor                    |      | Y                        | Y                             | N                                                 |                                | Y                                                 |                                | N                                                 |
| CC1650      | Hypothetical protein                             |      | Y                        | Y                             | N                                                 |                                | N                                                 | Patchy/Spotty                  | N                                                 |
|             | 3-methyl-2-oxobutanoate hydroxymethyltransferase |      | Y                        | Y                             | N                                                 |                                | N                                                 |                                | N                                                 |
| CC1651      | hydroxymethyltransferase                         |      | Y                        | Y                             | N                                                 |                                | N                                                 |                                | N                                                 |
| CC1652      | Hypothetical membrane associated protein         |      | Y                        | Y                             | N                                                 |                                | N                                                 |                                | N                                                 |
| CC1653      | PQQ enzyme repeat family protein                 |      | Y                        | Y                             | Y                                                 | Patchy/Spotty                  | N                                                 |                                | N                                                 |
| CC1654      | GTP-binding protein                              |      | Y                        | Y                             | N                                                 |                                | N                                                 |                                | N                                                 |
| CC1655      | Methyl-accepting chemotaxis protein              |      | Y                        | Y                             | Y                                                 | Pole                           | Y                                                 | Pole                           | Y                                                 |
| CC1656      | Short chain dehydrogenase                        |      | Y                        | N                             | N                                                 |                                | N                                                 |                                | N                                                 |
|             | Transporter, Sodium/bile acid symporter family   |      | Y                        | Y                             | N                                                 |                                | N                                                 |                                | N                                                 |
| CC1657      | family                                           |      | Y                        | Y                             | N                                                 |                                | N                                                 |                                | N                                                 |
| CC1658      | Amidophosphoribosyltransferase                   |      | Y                        | Y                             | Y                                                 | Middle OR Pole                 | N                                                 |                                | N                                                 |
| CC1659      | Colicin V production protein                     |      | Y                        | Y                             | N                                                 |                                | N                                                 |                                | N                                                 |
| CC1660      | DNA repair protein RadA                          |      | Y                        | Y                             | N                                                 |                                | N                                                 |                                | N                                                 |
| CC1661      | Alanine racemase                                 |      | Y                        | Y                             | N                                                 |                                | N                                                 |                                | N                                                 |
| CC1662      | MarC family integral membrane protein            |      | Y                        | Y                             | N                                                 |                                | N                                                 |                                | N                                                 |
| CC1663      | Paal thioesterase family protein                 |      | Y                        | Y                             | N                                                 |                                | N                                                 |                                | N                                                 |
| CC1664      | Transcriptional regulator, TetR family           |      | N                        | N                             | N                                                 |                                | N                                                 |                                | N                                                 |
| CC1665      | Replicative DNA helicase                         |      | Y                        | Y                             | N                                                 |                                | Y                                                 | Middle OR Pole                 | N                                                 |
| CC1666      | TonB-dependent outer membrane receptor           |      | Y                        | Y                             | N                                                 |                                | N                                                 |                                | N                                                 |
| CC1667      | LSU ribosomal protein L9P                        |      | Y                        | Y                             | N                                                 |                                | N                                                 |                                | N                                                 |
| CC1668      | SSU ribosomal protein S18P                       |      | Y                        | Y                             | N                                                 |                                | N                                                 |                                | N                                                 |
| CC1669      | SSU ribosomal protein S6P                        |      | Y                        | Y                             | N                                                 |                                | N                                                 |                                | N                                                 |
| CC1670      | Hypothetical protein                             |      | Y                        | Y                             | N                                                 |                                | N                                                 |                                | N                                                 |
| CC1671      | Sterol desaturase family protein                 |      | Y                        | Y                             | N                                                 |                                | N                                                 |                                | N                                                 |
| CC1672      | Transcriptional regulator                        |      | Y                        | Y                             | N                                                 |                                | N                                                 |                                | N                                                 |
| CC1673      | Thioredoxin peroxidase                           |      | Y                        | Y                             | N                                                 |                                | N                                                 |                                | N                                                 |
|             | Malonyl-CoA-[acyl-carrier-protein] transacylase  |      | N                        | N                             | N                                                 |                                | N                                                 |                                | N                                                 |
| CC1674      | transacylase                                     |      | N                        | N                             | N                                                 |                                | N                                                 |                                | N                                                 |
| CC1675      | 3-oxoacyl-[acyl-carrier protein] reductase       |      | Y                        | N                             | N                                                 |                                | N                                                 |                                | N                                                 |
| CC1676      | Methyltransferase                                |      | Y                        | Y                             | N                                                 |                                | N                                                 |                                | N                                                 |
| CC1677      | Acyl carrier protein                             |      | N                        | N                             | N                                                 |                                | N                                                 |                                | N                                                 |
| CC1678      | 3-oxoacyl-[acyl-carrier-protein] synthase        |      | Y                        | Y                             | N                                                 |                                | N                                                 |                                | N                                                 |
| CC1679      | Hypothetical membrane associated protein         |      | Y                        | N                             | N                                                 |                                | N                                                 |                                | N                                                 |
| CC1680      | Protein yicC                                     |      | Y                        | Y                             | N                                                 |                                | N                                                 |                                | N                                                 |
| CC1681      | Guanylate kinase                                 |      | Y                        | Y                             | N                                                 |                                | N                                                 |                                | N                                                 |
| CC1682      | Transglycosylase associated protein              |      | Y                        | Y                             | N                                                 |                                | N                                                 |                                | N                                                 |
| CC1683      | Two component sensor histidine kinase            |      | Y                        | Y                             | Y                                                 | Pole                           | N                                                 |                                | N                                                 |
| CC1684      | Hypothetical protein                             |      | Y                        | Y                             | N                                                 |                                | N                                                 |                                | N                                                 |
| CC1685      | Dimethyladenosine transferase                    |      | Y                        | Y                             | N                                                 |                                | N                                                 |                                | N                                                 |
|             | 4-hydroxythreonine-4-phosphate dehydrogenase     |      | Y                        | N                             | N                                                 |                                | N                                                 |                                | N                                                 |
| CC1686      | dehydrogenase                                    |      | Y                        | N                             | N                                                 |                                | N                                                 |                                | N                                                 |
| CC1687      |                                                  |      | N                        | N                             | N                                                 |                                | N                                                 |                                | N                                                 |
| CC1688      | Peptidyl-prolyl cis-trans isomerase              |      | N                        | N                             | N                                                 |                                | N                                                 |                                | N                                                 |
| CC1689      | Organic solvent tolerance protein                |      | Y                        | Y                             | N                                                 |                                | N                                                 |                                | N                                                 |
| CC1690      | Hypothetical membrane spanning protein           |      | Y                        | Y                             | N                                                 |                                | N                                                 |                                | N                                                 |
| CC1691      | Hypothetical membrane spanning protein           |      | Y                        | Y                             | N                                                 |                                | N                                                 |                                | N                                                 |
| CC1692      | Cytosol aminopeptidase                           |      | Y                        | Y                             | N                                                 |                                | N                                                 |                                | N                                                 |
| CC1693      | DNA polymerase III, chi subunit                  |      | Y                        | Y                             | N                                                 |                                | N                                                 |                                | N                                                 |
| CC1694      | Hypothetical protein                             |      | Y                        | Y                             | N                                                 |                                | N                                                 |                                | N                                                 |
| CC1695      | Conserved hypothetical protein                   |      | Y                        | Y                             | Y                                                 | Patchy/Spotty                  | N                                                 |                                | N                                                 |
| CC1696      | Cytochrome C family protein                      |      | Y                        | Y                             | N                                                 |                                | N                                                 |                                | N                                                 |
| CC1697      | Hypothetical protein                             |      | Y                        | Y                             | N                                                 |                                | N                                                 |                                | N                                                 |

| Gene Number | Annotation                                                                                                     | Gene | Entry Vector Constructed | Entry Vector Sequence Correct | Localized and Sequence-verified C-terminal Fusion | Localization w/ C-terminal Tag | Localized and Sequence-verified N-terminal Fusion | Localization w/ N-terminal Tag | Protein Localized as Both N- or C-terminal Fusion |
|-------------|----------------------------------------------------------------------------------------------------------------|------|--------------------------|-------------------------------|---------------------------------------------------|--------------------------------|---------------------------------------------------|--------------------------------|---------------------------------------------------|
| CC1698      | ABC transporter ATP-binding protein                                                                            |      | Y                        | Y                             | N                                                 |                                | N                                                 |                                | N                                                 |
| CC1699      | Nucleoside diphosphate kinase                                                                                  |      | Y                        | Y                             | N                                                 |                                | N                                                 |                                | N                                                 |
| CC1700      | Hypothetical membrane spanning protein                                                                         |      | Y                        | Y                             | N                                                 |                                | N                                                 |                                | N                                                 |
| CC1701      | SNARE-associated family membrane protein                                                                       |      | Y                        | Y                             | N                                                 |                                | N                                                 |                                | N                                                 |
| CC1702      | Phosphoribosylglycinamide formyltransferase                                                                    |      | Y                        | Y                             | N                                                 |                                | N                                                 |                                | N                                                 |
| CC1703      | Phosphoribosylformylglycinamide cyclo-ligase                                                                   |      | Y                        | N                             | N                                                 |                                | N                                                 |                                | N                                                 |
| CC1704      | Ribonuclease D                                                                                                 |      | Y                        | Y                             | N                                                 |                                | N                                                 |                                | N                                                 |
| CC1705      | hybrid sensor histidine kinase/receiver domain protein                                                         |      | Y                        | Y                             | Y                                                 | Patchy/Spotty                  | Y                                                 | Patchy/Spotty                  | Y                                                 |
| CC1706      | Penicillin-binding protein                                                                                     |      | N                        | N                             | N                                                 |                                | N                                                 |                                | N                                                 |
| CC1707      | Hypothetical protein                                                                                           |      | Y                        | Y                             | N                                                 |                                | N                                                 |                                | N                                                 |
| CC1708      | Exopolyphosphatase                                                                                             |      | Y                        | Y                             | N                                                 |                                | N                                                 |                                | N                                                 |
| CC1709      | Hypothetical protein                                                                                           |      | Y                        | Y                             | N                                                 |                                | N                                                 |                                | N                                                 |
| CC1710      | Polyphosphate kinase                                                                                           |      | Y                        | Y                             | N                                                 |                                | Y                                                 | Pole                           | N                                                 |
| CC1711      | DnaA-related protein                                                                                           |      | Y                        | Y                             | Y                                                 | Varied Focus                   | Y                                                 | Varied Focus                   | Y                                                 |
| CC1712      | Hypothetical protein                                                                                           |      | Y                        | Y                             | Y                                                 | Middle OR Pole                 | N                                                 |                                | N                                                 |
| CC1713      | Hypothetical protein                                                                                           |      | Y                        | Y                             | N                                                 |                                | N                                                 |                                | N                                                 |
| CC1714      |                                                                                                                |      | Y                        | Y                             | N                                                 |                                | N                                                 |                                | N                                                 |
| CC1715      | Protein ecsC                                                                                                   |      | Y                        | Y                             | Y                                                 | Patchy/Spotty                  | N                                                 |                                | N                                                 |
| CC1716      | Transposase                                                                                                    |      | Y                        | N                             | N                                                 |                                | N                                                 |                                | N                                                 |
| CC1717      |                                                                                                                |      | Y                        | N                             | N                                                 |                                | N                                                 |                                | N                                                 |
| CC1718      | Acetyltransferase, GNAT family                                                                                 |      | Y                        | Y                             | N                                                 |                                | N                                                 |                                | N                                                 |
| CC1719      | Protein translocase subunit secG                                                                               |      | N                        | N                             | N                                                 |                                | N                                                 |                                | N                                                 |
| CC1720      | CTP synthase                                                                                                   |      | Y                        | Y                             | Y                                                 | Line                           | Y                                                 | Line                           | Y                                                 |
| CC1721      | LSU ribosomal protein L32P                                                                                     |      | Y                        | Y                             | N                                                 |                                | N                                                 |                                | N                                                 |
| CC1722      | Hypothetical protein                                                                                           |      | Y                        | Y                             | N                                                 |                                | N                                                 |                                | N                                                 |
| CC1723      | Enoyl-CoA hydratase/isomerase family                                                                           |      | Y                        | N                             | N                                                 |                                | N                                                 |                                | N                                                 |
| CC1724      | Enolase                                                                                                        |      | Y                        | Y                             | N                                                 |                                | N                                                 |                                | N                                                 |
| CC1725      | Septum formation initiator                                                                                     |      | Y                        | Y                             | N                                                 |                                | N                                                 |                                | N                                                 |
| CC1726      | Pyruvate dehydrogenase E1 component alpha subunit                                                              |      | Y                        | Y                             | N                                                 |                                | Y                                                 | Patchy/Spotty                  | N                                                 |
| CC1727      | Pyruvate dehydrogenase E1 component beta subunit                                                               |      | Y                        | Y                             | Y                                                 | Middle OR Pole                 | Y                                                 | Middle OR Pole                 | Y                                                 |
| CC1728      | Hypothetical protein                                                                                           |      | Y                        | Y                             | N                                                 |                                | N                                                 |                                | N                                                 |
| CC1729      | Dihydrolipoamide acetyltransferase component of pyruvate dehydrogenase complex                                 |      | Y                        | Y                             | N                                                 |                                | N                                                 |                                | N                                                 |
| CC1730      | Glutathione peroxidase                                                                                         |      | Y                        | Y                             | N                                                 |                                | N                                                 |                                | N                                                 |
| CC1731      | Dihydrolipoamide dehydrogenase                                                                                 |      | Y                        | Y                             | N                                                 |                                | N                                                 |                                | N                                                 |
| CC1732      | Ferritin-like domain protein                                                                                   |      | Y                        | N                             | N                                                 |                                | N                                                 |                                | N                                                 |
| CC1733      | Acyl-acyl carrier protein synthetase                                                                           |      | Y                        | Y                             | N                                                 |                                | Y                                                 | Patchy/Spotty                  | N                                                 |
| CC1734      | Lysophospholipase L2                                                                                           |      | Y                        | Y                             | N                                                 |                                | N                                                 |                                | N                                                 |
| CC1735      | Lipoic acid synthetase                                                                                         |      | Y                        | Y                             | Y                                                 | Middle OR Pole                 | N                                                 |                                | N                                                 |
| CC1736      | Hypothetical cytosolic protein                                                                                 |      | Y                        | Y                             | N                                                 |                                | N                                                 |                                | N                                                 |
| CC1737      | Putative competence-damage protein                                                                             |      | Y                        | N                             | N                                                 |                                | N                                                 |                                | N                                                 |
| CC1738      | 2-C-methyl-D-erythritol 4-phosphate cytidyltransferase / 2-C-methyl-D-erythritol 2,4-cyclodiphosphate synthase |      | Y                        | N                             | N                                                 |                                | N                                                 |                                | N                                                 |
| CC1739      | tRNA-dihydrouridine synthase                                                                                   |      | Y                        | Y                             | N                                                 |                                | N                                                 |                                | N                                                 |
| CC1740      | Nitrogen regulation protein ntrB                                                                               |      | Y                        | Y                             | N                                                 |                                | N                                                 |                                | N                                                 |
| CC1741      | Nitrogen assimilation regulatory protein                                                                       |      | Y                        | Y                             | Y                                                 | Pole                           | N                                                 |                                | N                                                 |
| CC1742      | Nitrogen regulation protein ntrY                                                                               |      | Y                        | Y                             | N                                                 |                                | N                                                 |                                | N                                                 |

| Gene Number | Annotation                                              | Gene  | Entry Vector Constructed | Entry Vector Sequence Correct | Localized and Sequence-verified C-terminal Fusion | Localization w/ C-terminal Tag | Localized and Sequence-verified N-terminal Fusion | Localization w/ N-terminal Tag | Protein Localized as Both N- or C-terminal Fusion |
|-------------|---------------------------------------------------------|-------|--------------------------|-------------------------------|---------------------------------------------------|--------------------------------|---------------------------------------------------|--------------------------------|---------------------------------------------------|
| CC1743      | Nitrogen assimilation regulatory protein ntrX           |       | Y                        | Y                             | Y                                                 | Pole                           | N                                                 |                                | N                                                 |
| CC1744      | D-alanine aminotransferase                              |       | Y                        | Y                             | N                                                 |                                | N                                                 |                                | N                                                 |
| CC1745      | RNA-binding protein, Hfq family                         |       | Y                        | N                             | N                                                 |                                | N                                                 |                                | N                                                 |
| CC1746      | GTP-binding protein hflX                                |       | Y                        | Y                             | N                                                 |                                | N                                                 |                                | N                                                 |
| CC1747      | MazG protein                                            |       | Y                        | Y                             | N                                                 |                                | N                                                 |                                | N                                                 |
| CC1748      | Melibiose carrier protein                               |       | N                        | N                             | N                                                 |                                | N                                                 |                                | N                                                 |
| CC1749      |                                                         |       | Y                        | N                             | N                                                 |                                | N                                                 |                                | N                                                 |
| CC1750      | Vitamin B12 receptor                                    |       | Y                        | Y                             | N                                                 |                                | N                                                 |                                | N                                                 |
|             | Adenosylcobyrinic acid synthase (glutamine-hydrolysing) |       | Y                        | N                             | N                                                 |                                | N                                                 |                                | N                                                 |
| CC1751      |                                                         |       | Y                        | N                             | N                                                 |                                | N                                                 |                                | N                                                 |
| CC1752      | Conserved hypothetical protein                          |       | Y                        | N                             | N                                                 |                                | N                                                 |                                | N                                                 |
| CC1753      | Transcriptional regulator                               |       | Y                        | Y                             | N                                                 |                                | N                                                 |                                | N                                                 |
| CC1754      | TonB-dependent receptor                                 |       | Y                        | Y                             | N                                                 |                                | N                                                 |                                | N                                                 |
| CC1755      | TRYPTOPHAN HALOGENASE                                   |       | N                        | N                             | N                                                 |                                | N                                                 |                                | N                                                 |
| CC1756      | Beta-glucosidase                                        |       | N                        | N                             | N                                                 |                                | N                                                 |                                | N                                                 |
| CC1757      | Glucosylceramidase                                      |       | Y                        | Y                             | N                                                 |                                | N                                                 |                                | N                                                 |
| CC1758      | Oxidoreductase                                          |       | Y                        | Y                             | N                                                 |                                | N                                                 |                                | N                                                 |
| CC1759      | ABC transporter ATP-binding protein                     |       | Y                        | Y                             | N                                                 |                                | N                                                 |                                | N                                                 |
|             | Acyl-CoA thioesterase I / Lysophospholipase (3.1.1.5)   |       | Y                        | Y                             | N                                                 |                                | N                                                 |                                | N                                                 |
| CC1760      |                                                         |       | Y                        | Y                             | N                                                 |                                | N                                                 |                                | N                                                 |
| CC1761      | Transposase                                             |       | Y                        | Y                             | N                                                 |                                | N                                                 |                                | N                                                 |
| CC1762      |                                                         |       | Y                        | Y                             | N                                                 |                                | N                                                 |                                | N                                                 |
| CC1763      | Transcriptional regulator, MerR family                  |       | Y                        | Y                             | N                                                 |                                | N                                                 |                                | N                                                 |
| CC1764      | Isocitrate lyase                                        |       | Y                        | Y                             | N                                                 |                                | N                                                 |                                | N                                                 |
| CC1765      | Malate synthase                                         |       | Y                        | Y                             | N                                                 |                                | N                                                 |                                | N                                                 |
|             | DNA integration/recombination/inversion protein         |       | Y                        | Y                             | N                                                 |                                | N                                                 |                                | N                                                 |
| CC1766      |                                                         |       | Y                        | Y                             | N                                                 |                                | N                                                 |                                | N                                                 |
| CC1767      | Two-component response regulator protein                |       | Y                        | Y                             | N                                                 |                                | N                                                 |                                | N                                                 |
| CC1768      | Two-component sensor histidine kinase                   |       | Y                        | Y                             | N                                                 |                                | N                                                 |                                | N                                                 |
|             | Cytochrome c oxidase assembly protein                   |       |                          |                               |                                                   |                                |                                                   |                                |                                                   |
| CC1769      | Surf1                                                   |       | Y                        | Y                             | N                                                 |                                | N                                                 |                                | N                                                 |
| CC1770      | Quinol cytochrome oxidase polypeptide IV                | qoxD  | Y                        | Y                             | N                                                 |                                | N                                                 |                                | N                                                 |
| CC1771      | Quinol cytochrome oxidase polypeptide III               | qoxC  | Y                        | Y                             | N                                                 |                                | N                                                 |                                | N                                                 |
| CC1772      | Quinol cytochrome oxidase polypeptide I                 | qoxB  | Y                        | N                             | N                                                 |                                | N                                                 |                                | N                                                 |
| CC1773      | Quinol cytochrome oxidase polypeptide II                | qoxA  | Y                        | Y                             | N                                                 |                                | N                                                 |                                | N                                                 |
| CC1774      | Major facilitator superfamily transporter               |       | Y                        | Y                             | N                                                 |                                | N                                                 |                                | N                                                 |
| CC1775      | Hypothetical protein                                    |       | Y                        | Y                             | N                                                 |                                | N                                                 |                                | N                                                 |
| CC1776      | Transcriptional regulator, GntR family                  |       | Y                        | Y                             | N                                                 |                                | N                                                 |                                | N                                                 |
| CC1777      | Superoxide dismutase                                    |       | Y                        | Y                             | N                                                 |                                | N                                                 |                                | N                                                 |
| CC1778      | Ferrichrome-iron receptor                               |       | Y                        | Y                             | N                                                 |                                | N                                                 |                                | N                                                 |
| CC1779      | Transcriptional regulator, AraC family                  |       | N                        | N                             | N                                                 |                                | N                                                 |                                | N                                                 |
| CC1780      | Transcriptional regulator, AraC family                  |       | Y                        | Y                             | N                                                 |                                | N                                                 |                                | N                                                 |
| CC1781      | TonB-dependent receptor                                 |       | Y                        | Y                             | N                                                 |                                | N                                                 |                                | N                                                 |
| CC1782      | Rare lipoprotein B precursor                            |       | Y                        | Y                             | N                                                 |                                | N                                                 |                                | N                                                 |
| CC1783      | Hypothetical protein                                    |       | N                        | N                             | N                                                 |                                | N                                                 |                                | N                                                 |
| CC1784      | Hypothetical protein                                    |       | Y                        | Y                             | N                                                 |                                | N                                                 |                                | N                                                 |
| CC1785      | Outer membrane efflux protein                           |       | Y                        | Y                             | N                                                 |                                | N                                                 |                                | N                                                 |
| CC1786      | Transcriptional regulator, TetR family                  |       | Y                        | Y                             | N                                                 |                                | N                                                 |                                | N                                                 |
|             | Periplasmic multidrug efflux lipoprotein precursor      |       | Y                        | Y                             | N                                                 |                                | N                                                 |                                | N                                                 |
| CC1787      |                                                         |       | Y                        | Y                             | N                                                 |                                | N                                                 |                                | N                                                 |
| CC1788      | Cation/multidrug efflux pump acrB4                      | acrB4 | Y                        | Y                             | N                                                 |                                | N                                                 |                                | N                                                 |
| CC1789      | Hypothetical protein                                    |       | Y                        | Y                             | N                                                 |                                | N                                                 |                                | N                                                 |
| CC1790      | Hypothetical protein                                    |       | Y                        | Y                             | N                                                 |                                | N                                                 |                                | N                                                 |

| Gene Number | Annotation                                       | Gene | Entry Vector Constructed | Entry Vector Sequence Correct | Localized and Sequence-verified C-terminal Fusion | Localization w/ C-terminal Tag | Localized and Sequence-verified N-terminal Fusion | Localization w/ N-terminal Tag | Protein Localized as Both N- or C-terminal Fusion |
|-------------|--------------------------------------------------|------|--------------------------|-------------------------------|---------------------------------------------------|--------------------------------|---------------------------------------------------|--------------------------------|---------------------------------------------------|
| CC1791      | TonB-dependent receptor                          |      | N                        | N                             | N                                                 |                                | N                                                 |                                | N                                                 |
| CC1792      | Transcriptional repressor                        |      | N                        | N                             | N                                                 |                                | N                                                 |                                | N                                                 |
| CC1793      | Hypothetical protein                             |      | Y                        | N                             | N                                                 |                                | N                                                 |                                | N                                                 |
| CC1794      |                                                  |      | Y                        | Y                             | N                                                 |                                | N                                                 |                                | N                                                 |
| CC1795      | Hypothetical protein                             |      | Y                        | Y                             | N                                                 |                                | N                                                 |                                | N                                                 |
| CC1796      | Transposase                                      |      | Y                        | N                             | N                                                 |                                | N                                                 |                                | N                                                 |
| CC1797      |                                                  |      | Y                        | N                             | N                                                 |                                | N                                                 |                                | N                                                 |
| CC1798      | Acyl-CoA dehydrogenase, short-chain specific     |      | Y                        | Y                             | N                                                 |                                | N                                                 |                                | N                                                 |
| CC1799      | Cyclohexanone monooxygenase                      |      | Y                        | Y                             | N                                                 |                                | N                                                 |                                | N                                                 |
| CC1800      | Acyl-CoA thioesterase II                         |      | Y                        | Y                             | N                                                 |                                | N                                                 |                                | N                                                 |
| CC1801      | Long-chain-fatty-acid--CoA ligase                |      | Y                        | Y                             | N                                                 |                                | N                                                 |                                | N                                                 |
| CC1802      | NADH dehydrogenase                               |      | Y                        | Y                             | N                                                 |                                | N                                                 |                                | N                                                 |
| CC1803      | 3-oxoacyl-[acyl-carrier protein] reductase       |      | Y                        | Y                             | N                                                 |                                | N                                                 |                                | N                                                 |
| CC1804      | Hypothetical protein                             |      | Y                        | Y                             | N                                                 |                                | N                                                 |                                | N                                                 |
| CC1805      | Gluconolactonase                                 |      | Y                        | Y                             | N                                                 |                                | N                                                 |                                | N                                                 |
| CC1806      | Acyl-CoA dehydrogenase                           |      | Y                        | Y                             | N                                                 |                                | N                                                 |                                | N                                                 |
| CC1807      | Acyl-CoA dehydrogenase, short-chain specific     |      | N                        | N                             | N                                                 |                                | N                                                 |                                | N                                                 |
| CC1808      | Short chain dehydrogenase                        |      | Y                        | Y                             | N                                                 |                                | N                                                 |                                | N                                                 |
| CC1809      | TonB-dependent receptor                          |      | Y                        | Y                             | N                                                 |                                | N                                                 |                                | N                                                 |
| CC1810      |                                                  |      | Y                        | Y                             | N                                                 |                                | N                                                 |                                | N                                                 |
| CC1811      | Hypothetical protein                             |      | Y                        | Y                             | N                                                 |                                | N                                                 |                                | N                                                 |
| CC1812      | Transcriptional regulator                        |      | N                        | N                             | N                                                 |                                | N                                                 |                                | N                                                 |
| CC1813      | Enoyl-CoA hydratase/isomerase family protein     |      | Y                        | Y                             | N                                                 |                                | N                                                 |                                | N                                                 |
| CC1814      | Enoyl-CoA hydratase/carnithine racemase          |      | Y                        | Y                             | N                                                 |                                | N                                                 |                                | N                                                 |
| CC1815      |                                                  |      |                          |                               |                                                   |                                |                                                   |                                |                                                   |
| CC1816      | Short chain dehydrogenase                        |      | Y                        | N                             | N                                                 |                                | N                                                 |                                | N                                                 |
| CC1817      | Gamma-hexachlorocyclohexane dehydrochlorinase    |      | Y                        | Y                             | N                                                 |                                | N                                                 |                                | N                                                 |
| CC1818      | Cyclohexanone monooxygenase                      |      | Y                        | Y                             | N                                                 |                                | N                                                 |                                | N                                                 |
| CC1819      | Transporter                                      |      | Y                        | Y                             | N                                                 |                                | N                                                 |                                | N                                                 |
| CC1820      | Hypothetical protein                             |      | Y                        | Y                             | N                                                 |                                | N                                                 |                                | N                                                 |
| CC1821      | Metal-dependent hydrolase                        |      | Y                        | Y                             | N                                                 |                                | N                                                 |                                | N                                                 |
| CC1822      | DNase, TatD family                               |      | Y                        | Y                             | N                                                 |                                | N                                                 |                                | N                                                 |
| CC1823      | DNA polymerase III, delta' subunit               |      | Y                        | Y                             | N                                                 |                                | N                                                 |                                | N                                                 |
| CC1824      | Thymidylate kinase                               |      | Y                        | Y                             | N                                                 |                                | N                                                 |                                | N                                                 |
| CC1825      | Lipoprotein                                      |      | N                        | N                             | N                                                 |                                | N                                                 |                                | N                                                 |
| CC1826      | Nickel-responsive regulator NikR                 |      | Y                        | Y                             | N                                                 |                                | N                                                 |                                | N                                                 |
| CC1827      | Hypothetical cytosolic protein                   |      | Y                        | Y                             | N                                                 |                                | N                                                 |                                | N                                                 |
| CC1828      | Hypothetical cytosolic protein                   |      | Y                        | Y                             | N                                                 |                                | N                                                 |                                | N                                                 |
| CC1829      | Urea carboxylase                                 |      | N                        | N                             | N                                                 |                                | N                                                 |                                | N                                                 |
| CC1830      | Allophanate hydrolase                            |      | N                        | N                             | N                                                 |                                | N                                                 |                                | N                                                 |
| CC1831      | ABC transporter ATP-binding protein              |      | Y                        | Y                             | N                                                 |                                | N                                                 |                                | N                                                 |
| CC1832      | Transporter                                      |      | Y                        | Y                             | N                                                 |                                | N                                                 |                                | N                                                 |
| CC1833      | ABC transporter substrate-binding protein        |      | Y                        | Y                             | N                                                 |                                | N                                                 |                                | N                                                 |
| CC1834      | Glyoxalase family protein                        |      | Y                        | Y                             | N                                                 |                                | N                                                 |                                | N                                                 |
| CC1835      | Protein ydhR precursor                           |      | Y                        | Y                             | N                                                 |                                | N                                                 |                                | N                                                 |
| CC1836      | Transcriptional regulator, MarR family           |      | Y                        | N                             | N                                                 |                                | N                                                 |                                | N                                                 |
| CC1837      | 16S rRNA m(2)G 1207 methyltransferase            |      | Y                        | Y                             | N                                                 |                                | N                                                 |                                | N                                                 |
| CC1838      | Ribosomal small subunit pseudouridine synthase A |      | Y                        | Y                             | N                                                 |                                | N                                                 |                                | N                                                 |

| Gene Number | Annotation                                                                               | Gene | Entry Vector Constructed | Entry Vector Sequence Correct | Localized and Sequence-verified C-terminal Fusion | Localization w/ C-terminal Tag | Localized and Sequence-verified N-terminal Fusion | Localization w/ N-terminal Tag | Protein Localized as Both N- or C-terminal Fusion |
|-------------|------------------------------------------------------------------------------------------|------|--------------------------|-------------------------------|---------------------------------------------------|--------------------------------|---------------------------------------------------|--------------------------------|---------------------------------------------------|
| CC1839      |                                                                                          |      | N                        | N                             | N                                                 |                                | N                                                 |                                | N                                                 |
| CC1840      | Ribonuclease BN                                                                          |      | Y                        | Y                             | N                                                 |                                | N                                                 |                                | N                                                 |
| CC1841      | Alpha-methylacyl-CoA racemase                                                            |      | Y                        | Y                             | N                                                 |                                | N                                                 |                                | N                                                 |
| CC1842      | Two-component response regulator                                                         |      | N                        | N                             | N                                                 |                                | N                                                 |                                | N                                                 |
| CC1843      | FrnE protein                                                                             |      | Y                        | Y                             | N                                                 |                                | N                                                 |                                | N                                                 |
| CC1844      | Transcription-repair coupling factor                                                     |      | N                        | N                             | N                                                 |                                | N                                                 |                                | N                                                 |
| CC1845      | TPR repeat containing protein                                                            |      | Y                        | Y                             | N                                                 |                                | N                                                 |                                | N                                                 |
| CC1846      | SAM-dependent methyltransferase                                                          |      | Y                        | Y                             | N                                                 |                                | Y                                                 | Patchy/Spotty                  | N                                                 |
| CC1847      | ATP-dependent RNA helicase                                                               |      | Y                        | N                             | N                                                 |                                | N                                                 |                                | N                                                 |
| CC1848      | Capsular polysaccharide biosynthesis protein                                             |      | N                        | N                             | N                                                 |                                | N                                                 |                                | N                                                 |
| CC1849      | Coniferyl aldehyde dehydrogenase                                                         |      | Y                        | Y                             | N                                                 |                                | N                                                 |                                | N                                                 |
| CC1850      | Two-component response regulator                                                         |      | Y                        | Y                             | Y                                                 | Pole                           | N                                                 |                                | N                                                 |
| CC1851      | Enoyl-CoA hydratase                                                                      |      | Y                        | N                             | N                                                 |                                | N                                                 |                                | N                                                 |
| CC1852      | Hypothetical membrane protein                                                            |      | Y                        | Y                             | N                                                 |                                | N                                                 |                                | N                                                 |
| CC1853      | Conserved hypothetical protein                                                           |      | Y                        | Y                             | N                                                 |                                | N                                                 |                                | N                                                 |
| CC1854      | ADP-heptose LPS heptosyltransferase                                                      |      | N                        | N                             | N                                                 |                                | N                                                 |                                | N                                                 |
| CC1855      | Transcriptional regulator, TetR family 1-acyl-sn-glycerol-3-phosphate acyltransferase    |      | Y                        | Y                             | N                                                 |                                | N                                                 |                                | N                                                 |
| CC1856      |                                                                                          |      | N                        | N                             | N                                                 |                                | N                                                 |                                | N                                                 |
| CC1857      | Hypothetical protein                                                                     |      | Y                        | Y                             | N                                                 |                                | N                                                 |                                | N                                                 |
| CC1858      | HesB protein family                                                                      |      | Y                        | Y                             | N                                                 |                                | N                                                 |                                | N                                                 |
| CC1859      | Hypothetical cytosolic protein                                                           |      | Y                        | Y                             | N                                                 |                                | N                                                 |                                | N                                                 |
| CC1860      | Cysteine desulfurase / Selenocysteine lyase                                              |      | Y                        | Y                             | N                                                 |                                | N                                                 |                                | N                                                 |
| CC1861      | SufD protein                                                                             |      | Y                        | Y                             | N                                                 |                                | N                                                 |                                | N                                                 |
| CC1862      | ATP-dependent transporter sufC                                                           |      | Y                        | Y                             | N                                                 |                                | N                                                 |                                | N                                                 |
| CC1863      | ADP-ribosylglycohydrolase                                                                |      | Y                        | Y                             | N                                                 |                                | N                                                 |                                | N                                                 |
| CC1864      | ABC transporter-associated protein sufB Cysteine desulfhydrase / Selenocysteine lyase    |      | Y                        | Y                             | N                                                 |                                | Y                                                 | Middle OR Pole                 | N                                                 |
| CC1865      |                                                                                          |      | Y                        | N                             | N                                                 |                                | N                                                 |                                | N                                                 |
| CC1866      | Rrf2 family protein                                                                      |      | Y                        | Y                             | N                                                 |                                | N                                                 |                                | N                                                 |
| CC1867      | Alpha/beta hydrolase                                                                     |      | Y                        | Y                             | N                                                 |                                | N                                                 |                                | N                                                 |
| CC1868      | Hypothetical cytosolic protein                                                           |      | Y                        | Y                             | N                                                 |                                | N                                                 |                                | N                                                 |
| CC1869      | Hypothetical protein                                                                     |      | Y                        | N                             | N                                                 |                                | N                                                 |                                | N                                                 |
| CC1870      | Tyrosyl-tRNA synthetase                                                                  |      | Y                        | Y                             | N                                                 |                                | N                                                 |                                | N                                                 |
| CC1871      | Thioredoxin peroxidase                                                                   |      | Y                        | Y                             | N                                                 |                                | N                                                 |                                | N                                                 |
| CC1872      | Peptidoglycan-specific endopeptidase, M23 family                                         |      | N                        | N                             | N                                                 |                                | N                                                 |                                | N                                                 |
| CC1873      | Hypothetical cytosolic protein Bacterial Peptide Chain Release Factor 2 (RF-2)           |      | Y                        | Y                             | Y                                                 | Patchy/Spotty                  | N                                                 |                                | N                                                 |
| CC1874      | Multimodular transpeptidase-transglycosylase PBP 1A                                      |      | N                        | N                             | N                                                 |                                | N                                                 |                                | N                                                 |
| CC1875      |                                                                                          |      | Y                        | Y                             | N                                                 |                                | N                                                 |                                | N                                                 |
| CC1876      | N-acetylmuramoyl-L-alanine amidase                                                       |      | N                        | N                             | N                                                 |                                | N                                                 |                                | N                                                 |
| CC1877      | Ribonuclease E                                                                           |      | N                        | N                             | N                                                 |                                | N                                                 |                                | N                                                 |
| CC1878      | Zinc metalloprotease                                                                     |      | Y                        | Y                             | N                                                 |                                | N                                                 |                                | N                                                 |
| CC1879      | Outer membrane protein                                                                   |      | N                        | N                             | N                                                 |                                | N                                                 |                                | N                                                 |
| CC1880      | Thiazole biosynthesis protein thiG                                                       | thiG | Y                        | Y                             | N                                                 |                                | N                                                 |                                | N                                                 |
| CC1881      | ThiS protein                                                                             | thiS | Y                        | Y                             | N                                                 |                                | N                                                 |                                | N                                                 |
| CC1882      | 3-dehydroquininate dehydratase Biotin carboxyl carrier protein of acetyl-CoA carboxylase |      | Y                        | N                             | N                                                 |                                | N                                                 |                                | N                                                 |
| CC1883      |                                                                                          |      | Y                        | Y                             | N                                                 |                                | N                                                 |                                | N                                                 |
| CC1884      | Biotin carboxylase                                                                       |      | Y                        | Y                             | N                                                 |                                | N                                                 |                                | N                                                 |



| Gene Number | Annotation                                                                                               | Gene | Entry Vector Constructed | Entry Vector Sequence Correct | Localized and Sequence-verified C-terminal Fusion | Localization w/ C-terminal Tag | Localized and Sequence-verified N-terminal Fusion | Localization w/ N-terminal Tag | Protein Localized as Both N- or C-terminal Fusion |
|-------------|----------------------------------------------------------------------------------------------------------|------|--------------------------|-------------------------------|---------------------------------------------------|--------------------------------|---------------------------------------------------|--------------------------------|---------------------------------------------------|
| CC1885      | Leucyl/phenylalanyl-tRNA--protein transferase                                                            |      | Y                        | Y                             | N                                                 |                                | N                                                 |                                | N                                                 |
| CC1886      | Conserved hypothetical protein                                                                           |      | Y                        | Y                             | N                                                 |                                | N                                                 |                                | N                                                 |
| CC1887      | NADH dehydrogenase                                                                                       |      | N                        | N                             | N                                                 |                                | N                                                 |                                | N                                                 |
| CC1888      | Hypothetical protein                                                                                     |      | Y                        | Y                             | N                                                 |                                | N                                                 |                                | N                                                 |
| CC1889      | Vitamin B12-dependent ribonucleotide reductase                                                           |      | Y                        | Y                             | N                                                 |                                | N                                                 |                                | N                                                 |
| CC1890      | Hypothetical protein with pentapeptide repeats                                                           |      | Y                        | Y                             | N                                                 |                                | N                                                 |                                | N                                                 |
| CC1891      | Hypothetical protein with pentapeptide repeats                                                           |      | Y                        | Y                             | N                                                 |                                | N                                                 |                                | N                                                 |
| CC1892      | Aspartyl-tRNA synthetase                                                                                 |      | Y                        | Y                             | N                                                 |                                | N                                                 |                                | N                                                 |
| CC1893      | Triosephosphate isomerase                                                                                |      | Y                        | Y                             | N                                                 |                                | N                                                 |                                | N                                                 |
| CC1894      | Peptidyl-prolyl cis-trans isomerase                                                                      |      | Y                        | Y                             | N                                                 |                                | N                                                 |                                | N                                                 |
| CC1895      | Anthranilate synthase component I                                                                        |      | Y                        | Y                             | N                                                 |                                | N                                                 |                                | N                                                 |
| CC1896      | Hypothetical protein                                                                                     |      | Y                        | Y                             | N                                                 |                                | N                                                 |                                | N                                                 |
| CC1897      | Anthranilate synthase component II / Para-aminobenzoate synthase glutamine amidotransferase component II |      | Y                        | Y                             | N                                                 |                                | N                                                 |                                | N                                                 |
| CC1898      | Anthranilate phosphoribosyltransferase                                                                   |      | Y                        | Y                             | N                                                 |                                | N                                                 |                                | N                                                 |
| CC1899      | Indole-3-glycerol phosphate synthase                                                                     |      | N                        | N                             | N                                                 |                                | N                                                 |                                | N                                                 |
| CC1900      | 1-acyl-sn-glycerol-3-phosphate acyltransferase                                                           |      | Y                        | Y                             | N                                                 |                                | N                                                 |                                | N                                                 |
| CC1901      | Methyltransferase                                                                                        |      | Y                        | Y                             | N                                                 |                                | N                                                 |                                | N                                                 |
| CC1902      | LexA repressor                                                                                           |      | Y                        | Y                             | N                                                 |                                | N                                                 |                                | N                                                 |
| CC1903      | Methylisocitrate lyase                                                                                   |      | Y                        | Y                             | N                                                 |                                | N                                                 |                                | N                                                 |
| CC1904      | DNA translocation competence protein ComA                                                                |      | Y                        | Y                             | N                                                 |                                | N                                                 |                                | N                                                 |
| CC1905      | Glutamyl-tRNA synthetase                                                                                 |      | Y                        | Y                             | N                                                 |                                | N                                                 |                                | N                                                 |
| CC1906      | Citrate synthase                                                                                         |      | Y                        | N                             | N                                                 |                                | N                                                 |                                | N                                                 |
| CC1907      | Homolog of the cytoplasmic domain of flagellar protein flhB                                              |      | Y                        | Y                             | N                                                 |                                | N                                                 |                                | N                                                 |
| CC1908      | ABC transporter ATP-binding protein                                                                      |      | Y                        | Y                             | N                                                 |                                | N                                                 |                                | N                                                 |
| CC1909      | Lipid-A-disaccharide synthase                                                                            |      | Y                        | Y                             | N                                                 |                                | N                                                 |                                | N                                                 |
| CC1910      | Hypothetical protein                                                                                     |      | Y                        | Y                             | Y                                                 | Central - Focus                | Y                                                 | Central - Focus                | Y                                                 |
| CC1911      | Acyl-[acyl-carrier-protein]--UDP-N-acetylglucosamine O-acyltransferase                                   |      | Y                        | Y                             | N                                                 |                                | N                                                 |                                | N                                                 |
| CC1912      | (3R)-hydroxymyristoyl-[acyl carrier protein] dehydratase                                                 |      | Y                        | Y                             | N                                                 |                                | N                                                 |                                | N                                                 |
| CC1913      | UDP-3-O-[3-hydroxymyristoyl] glucosamine N-acyltransferase                                               |      | Y                        | Y                             | N                                                 |                                | N                                                 |                                | N                                                 |
| CC1914      | Hypothetical outer membrane protein                                                                      |      | Y                        | Y                             | N                                                 |                                | N                                                 |                                | N                                                 |
| CC1915      | Outer membrane protein assembly factor yaeT                                                              |      | Y                        | Y                             | N                                                 |                                | N                                                 |                                | N                                                 |
| CC1916      | Membrane endopeptidase, M50 family mmpA                                                                  | mmpA | Y                        | Y                             | N                                                 |                                | N                                                 |                                | N                                                 |
| CC1917      | 1-deoxy-D-xylulose 5-phosphate reductoisomerase                                                          |      | N                        | N                             | N                                                 |                                | N                                                 |                                | N                                                 |
| CC1918      | Phosphatidate cytidyltransferase                                                                         |      | Y                        | Y                             | N                                                 |                                | N                                                 |                                | N                                                 |
| CC1919      | Undecaprenyl pyrophosphate synthetase                                                                    |      | Y                        | Y                             | N                                                 |                                | N                                                 |                                | N                                                 |
| CC1920      | Ribosome Recycling Factor (RRF)                                                                          |      | Y                        | Y                             | N                                                 |                                | N                                                 |                                | N                                                 |
| CC1921      | Uridylate kinase                                                                                         |      | Y                        | Y                             | N                                                 |                                | N                                                 |                                | N                                                 |
| CC1922      | Protein Translation Elongation Factor Ts (EF-Ts)                                                         |      | Y                        | N                             | N                                                 |                                | N                                                 |                                | N                                                 |
| CC1923      | SSU ribosomal protein S2P                                                                                |      | Y                        | Y                             | N                                                 |                                | N                                                 |                                | N                                                 |

| Gene Number | Annotation                                                            | Gene | Entry Vector Constructed | Entry Vector Sequence Correct | Localized and Sequence-verified C-terminal Fusion | Localization w/ C-terminal Tag | Localized and Sequence-verified N-terminal Fusion | Localization w/ N-terminal Tag | Protein Localized as Both N- or C-terminal Fusion |
|-------------|-----------------------------------------------------------------------|------|--------------------------|-------------------------------|---------------------------------------------------|--------------------------------|---------------------------------------------------|--------------------------------|---------------------------------------------------|
| CC1924      | Phosphoserine phosphatase                                             |      | Y                        | Y                             | N                                                 |                                | N                                                 |                                | N                                                 |
| CC1925      | Methyltransferase                                                     |      | Y                        | Y                             | N                                                 |                                | N                                                 |                                | N                                                 |
| CC1926      | DNA polymerase III alpha subunit                                      |      | N                        | N                             | N                                                 |                                | N                                                 |                                | N                                                 |
| CC1927      | Hypothetical protein                                                  |      | Y                        | Y                             | N                                                 |                                | N                                                 |                                | N                                                 |
| CC1928      | Inosine-uridine preferring nucleoside hydrolase                       |      | Y                        | Y                             | Y                                                 | Middle OR Pole                 | N                                                 |                                | N                                                 |
| CC1929      | Lipoprotein releasing system ATP-binding protein lolD                 |      | Y                        | Y                             | N                                                 |                                | N                                                 |                                | N                                                 |
| CC1930      | Lipoprotein releasing system transmembrane protein lolE               |      | Y                        | Y                             | N                                                 |                                | N                                                 |                                | N                                                 |
| CC1931      | Prolyl-tRNA synthetase                                                |      | Y                        | Y                             | N                                                 |                                | N                                                 |                                | N                                                 |
| CC1932      | Hypothetical membrane associated protein                              |      | Y                        | Y                             | N                                                 |                                | N                                                 |                                | N                                                 |
| CC1933      | Methylmalonyl CoA epimerase                                           |      | Y                        | Y                             | N                                                 |                                | N                                                 |                                | N                                                 |
| CC1934      | Metal-dependent hydrolase                                             |      | Y                        | Y                             | N                                                 |                                | N                                                 |                                | N                                                 |
| CC1935      | Pantothenate kinase / Bvg accessory factor                            |      | Y                        | Y                             | N                                                 |                                | N                                                 |                                | N                                                 |
| CC1936      | Biotin operon repressor / Biotin--[acetyl-CoA-carboxylase] synthetase |      | Y                        | Y                             | N                                                 |                                | N                                                 |                                | N                                                 |
| CC1937      | NADH-quinone oxidoreductase chain N                                   | nuoN | Y                        | Y                             | N                                                 |                                | N                                                 |                                | N                                                 |
| CC1938      | NADH-quinone oxidoreductase chain M                                   | nuoM | Y                        | Y                             | N                                                 |                                | N                                                 |                                | N                                                 |
| CC1939      | NADH-quinone oxidoreductase chain L                                   | nuoL | Y                        | Y                             | N                                                 |                                | N                                                 |                                | N                                                 |
| CC1940      | NADH-quinone oxidoreductase chain K                                   | nuoK | Y                        | Y                             | N                                                 |                                | N                                                 |                                | N                                                 |
| CC1941      | NADH-quinone oxidoreductase chain J                                   | nuoJ | Y                        | Y                             | N                                                 |                                | N                                                 |                                | N                                                 |
| CC1942      | NADH-quinone oxidoreductase chain I                                   | nuoI | Y                        | Y                             | N                                                 |                                | N                                                 |                                | N                                                 |
| CC1943      | hypothetical protein                                                  |      | N                        | N                             | N                                                 |                                | N                                                 |                                | N                                                 |
| CC1944      |                                                                       |      | Y                        | Y                             | N                                                 |                                | N                                                 |                                | N                                                 |
| CC1945      | NADH-quinone oxidoreductase chain H                                   | nuoH | Y                        | Y                             | N                                                 |                                | N                                                 |                                | N                                                 |
| CC1946      | NADH-quinone oxidoreductase chain G                                   | nuoG | Y                        | Y                             | N                                                 |                                | N                                                 |                                | N                                                 |
| CC1947      | NADH-quinone oxidoreductase chain F                                   | nuoF | Y                        | Y                             | N                                                 |                                | N                                                 |                                | N                                                 |
| CC1948      | hypothetical protein                                                  |      | Y                        | Y                             | N                                                 |                                | N                                                 |                                | N                                                 |
| CC1949      | hypothetical protein                                                  |      | N                        | N                             | N                                                 |                                | N                                                 |                                | N                                                 |
| CC1950      | NADH-quinone oxidoreductase chain E                                   | nuoE | Y                        | Y                             | N                                                 |                                | N                                                 |                                | N                                                 |
| CC1951      | NTF2 enzyme family protein                                            |      | Y                        | N                             | N                                                 |                                | N                                                 |                                | N                                                 |
| CC1952      | NADH-quinone oxidoreductase chain D                                   | nuoD | Y                        | Y                             | N                                                 |                                | N                                                 |                                | N                                                 |
| CC1953      | hypothetical protein                                                  |      | Y                        | Y                             | Y                                                 | Stalk                          | Y                                                 | Stalk                          | Y                                                 |
| CC1954      | NADH-quinone oxidoreductase chain C                                   | nuoC | Y                        | Y                             | N                                                 |                                | N                                                 |                                | N                                                 |
| CC1955      | NADH-quinone oxidoreductase chain B                                   | nuoB | Y                        | Y                             | N                                                 |                                | N                                                 |                                | N                                                 |
| CC1956      | NADH-quinone oxidoreductase chain A                                   | nuoA | Y                        | Y                             | N                                                 |                                | N                                                 |                                | N                                                 |
| CC1957      | Luciferase-like monooxygenase                                         |      | Y                        | Y                             | N                                                 |                                | N                                                 |                                | N                                                 |
| CC1958      | Glycosyltransferase                                                   |      | Y                        | Y                             | N                                                 |                                | N                                                 |                                | N                                                 |
| CC1959      | DNA-binding protein HU                                                |      | Y                        | Y                             | N                                                 |                                | N                                                 |                                | N                                                 |
| CC1960      | ATP-dependent endopeptidase Lon                                       |      | Y                        | Y                             | N                                                 |                                | N                                                 |                                | N                                                 |
| CC1961      | ATP-dependent endopeptidase clp ATP-binding subunit clpX              | clpX | Y                        | Y                             | N                                                 |                                | Y                                                 | Middle OR Pole                 | N                                                 |
| CC1962      | Phosphoserine phosphatase                                             |      | Y                        | Y                             | N                                                 |                                | N                                                 |                                | N                                                 |
| CC1963      | ATP-dependent endopeptidase clp proteolytic subunit clpP              | clpP | Y                        | Y                             | Y                                                 | Pole                           | N                                                 |                                | N                                                 |
| CC1964      | Trigger factor, ppiase                                                |      | Y                        | Y                             | N                                                 |                                | N                                                 |                                | N                                                 |
| CC1965      | Sugar kinase                                                          |      | Y                        | Y                             | N                                                 |                                | N                                                 |                                | N                                                 |
| CC1966      | Phosphoglycerate mutase                                               |      | Y                        | Y                             | N                                                 |                                | N                                                 |                                | N                                                 |
| CC1967      | Acetyl-coenzyme A synthetase                                          |      | Y                        | Y                             | N                                                 |                                | N                                                 |                                | N                                                 |
| CC1968      | Nitrogen regulatory protein P-II                                      |      | Y                        | Y                             | N                                                 |                                | N                                                 |                                | N                                                 |
| CC1969      | Glutamine synthetase                                                  |      | Y                        | Y                             | N                                                 |                                | N                                                 |                                | N                                                 |
| CC1970      | TonB-dependent receptor                                               |      | Y                        | N                             | N                                                 |                                | N                                                 |                                | N                                                 |

| Gene Number | Annotation                                                                                                | Gene | Entry Vector Constructed | Entry Vector Sequence Correct | Localized and Sequence-verified C-terminal Fusion | Localization w/ C-terminal Tag | Localized and Sequence-verified N-terminal Fusion | Localization w/ N-terminal Tag | Protein Localized as Both N- or C-terminal Fusion |
|-------------|-----------------------------------------------------------------------------------------------------------|------|--------------------------|-------------------------------|---------------------------------------------------|--------------------------------|---------------------------------------------------|--------------------------------|---------------------------------------------------|
| CC1971      | ABM superfamily monooxygenase protein                                                                     |      | Y                        | N                             | N                                                 |                                | N                                                 |                                | N                                                 |
| CC1972      | Dihydroorotase                                                                                            |      | Y                        | Y                             | N                                                 |                                | N                                                 |                                | N                                                 |
| CC1973      | Dihydroorotase                                                                                            |      | Y                        | Y                             | N                                                 |                                | N                                                 |                                | N                                                 |
| CC1974      | Topoisomerase IV subunit B                                                                                |      | Y                        | Y                             | N                                                 |                                | N                                                 |                                | N                                                 |
| CC1975      | Propionyl-CoA carboxylase carboxyltransferase subunit conserved hypothetical protein, YnfA/UPF0060 family |      | Y                        | Y                             | N                                                 |                                | N                                                 |                                | N                                                 |
| CC1976      | Chaperone, ATP12 family protein                                                                           |      | Y                        | N                             | N                                                 |                                | N                                                 |                                | N                                                 |
| CC1978      | Hypothetical protein                                                                                      |      | Y                        | Y                             | N                                                 |                                | N                                                 |                                | N                                                 |
| CC1979      | Hypothetical protein                                                                                      |      | Y                        | Y                             | N                                                 |                                | N                                                 |                                | N                                                 |
| CC1980      | Ribosomal large subunit pseudouridine synthase C                                                          |      | Y                        | Y                             | N                                                 |                                | N                                                 |                                | N                                                 |
| CC1981      | CrcB family protein                                                                                       |      | Y                        | Y                             | N                                                 |                                | N                                                 |                                | N                                                 |
| CC1982      | hypothetical protein                                                                                      |      | Y                        | Y                             | Y                                                 | Pole                           | Y                                                 | Pole                           | Y                                                 |
| CC1983      | DNA repair protein recN                                                                                   |      | Y                        | Y                             | N                                                 |                                | Y                                                 | Central - Focus                | N                                                 |
| CC1984      | Lipoprotein, ComL family                                                                                  |      | Y                        | Y                             | N                                                 |                                | N                                                 |                                | N                                                 |
| CC1985      | UDP-3-O-[3-hydroxymyristoyl] N-acetylglucosamine deacetylase                                              |      | Y                        | Y                             | N                                                 |                                | N                                                 |                                | N                                                 |
| CC1986      | Acylamino-acid-releasing enzyme                                                                           |      | Y                        | N                             | N                                                 |                                | N                                                 |                                | N                                                 |
| CC1987      | Phytoene synthase family protein                                                                          |      | Y                        | Y                             | N                                                 |                                | N                                                 |                                | N                                                 |
| CC1988      | Conserved membrane spanning protein                                                                       |      | Y                        | Y                             | N                                                 |                                | N                                                 |                                | N                                                 |
| CC1989      | Mth938-like membrane protein                                                                              |      | Y                        | N                             | N                                                 |                                | N                                                 |                                | N                                                 |
| CC1990      | Protein translocase subunit secF                                                                          |      | Y                        | Y                             | N                                                 |                                | N                                                 |                                | N                                                 |
| CC1991      | Protein translocase subunit secD                                                                          |      | Y                        | Y                             | N                                                 |                                | N                                                 |                                | N                                                 |
| CC1992      | Protein translocase subunit YajC                                                                          |      | Y                        | N                             | N                                                 |                                | N                                                 |                                | N                                                 |
| CC1993      | ATP-dependent protease subunit                                                                            |      | Y                        | Y                             | N                                                 |                                | N                                                 |                                | N                                                 |
| CC1994      | Transcriptional regulator                                                                                 |      | N                        | N                             | N                                                 |                                | N                                                 |                                | N                                                 |
| CC1995      | IAA acetyltransferase                                                                                     |      | Y                        | Y                             | N                                                 |                                | N                                                 |                                | N                                                 |
| CC1996      | Peptidoglycan-specific endopeptidase, M23 family                                                          |      | Y                        | Y                             | Y                                                 | Middle AND Pole                | N                                                 |                                | N                                                 |
| CC1997      | Protein-L-isoaspartate O-methyltransferase                                                                |      | Y                        | N                             | N                                                 |                                | N                                                 |                                | N                                                 |
| CC1998      | Acid phosphatase surE                                                                                     |      | N                        | N                             | N                                                 |                                | N                                                 |                                | N                                                 |
| CC1999      | Seryl-tRNA synthetase                                                                                     | serS | Y                        | Y                             | N                                                 |                                | N                                                 |                                | N                                                 |
| CC2000      | PE-PGRS-family protein                                                                                    |      | Y                        | Y                             | N                                                 |                                | N                                                 |                                | N                                                 |
| CC2001      | Sec-independent protein translocase protein tatC                                                          |      | Y                        | Y                             | N                                                 |                                | N                                                 |                                | N                                                 |
| CC2002      | Sec-independent protein translocase protein tatB                                                          |      | Y                        | N                             | N                                                 |                                | N                                                 |                                | N                                                 |
| CC2003      | Sec-independent protein translocase protein tatA                                                          |      | Y                        | Y                             | Y                                                 | Middle OR Pole                 | N                                                 |                                | N                                                 |
| CC2004      | Chromosome segregation and condensation protein B scpB                                                    | scpB | Y                        | Y                             | N                                                 |                                | N                                                 |                                | N                                                 |
| CC2005      | Chromosome segregation and condensation protein fusion scpAB                                              |      | Y                        | Y                             | N                                                 |                                | N                                                 |                                | N                                                 |
| CC2006      | Anhydromuramoyl-peptide exo-beta-N-acetylglucosaminidase                                                  |      | Y                        | Y                             | N                                                 |                                | N                                                 |                                | N                                                 |
| CC2007      | sporulation domain-containing protein                                                                     |      | N                        | N                             | N                                                 |                                | N                                                 |                                | N                                                 |
| CC2008      | Deoxyguanosinetriphosphate triphosphohydrolase                                                            |      | Y                        | Y                             | N                                                 |                                | N                                                 |                                | N                                                 |
| CC2009      | HesB protein family                                                                                       |      | N                        | N                             | N                                                 |                                | N                                                 |                                | N                                                 |
| CC2010      | hypothetical protein                                                                                      |      | Y                        | Y                             | N                                                 |                                | N                                                 |                                | N                                                 |
| CC2011      | Exodeoxyribonuclease III                                                                                  |      | Y                        | Y                             | N                                                 |                                | N                                                 |                                | N                                                 |

| Gene Number | Annotation                                    | Gene | Entry Vector Constructed | Entry Vector Sequence Correct | Localized and Sequence-verified C-terminal Fusion | Localization w/ C-terminal Tag | Localized and Sequence-verified N-terminal Fusion | Localization w/ N-terminal Tag | Protein Localized as Both N- or C-terminal Fusion |
|-------------|-----------------------------------------------|------|--------------------------|-------------------------------|---------------------------------------------------|--------------------------------|---------------------------------------------------|--------------------------------|---------------------------------------------------|
| CC2012      | conserved hypothetical protein                |      | Y                        | N                             | N                                                 |                                | N                                                 |                                | N                                                 |
| CC2013      | Transporter, LysE family                      |      | N                        | N                             | N                                                 |                                | N                                                 |                                | N                                                 |
| CC2014      | Hypothetical cytosolic protein                |      | Y                        | Y                             | N                                                 |                                | N                                                 |                                | N                                                 |
| CC2015      | NAD-dependent oxidoreductase                  |      | Y                        | Y                             | N                                                 |                                | N                                                 |                                | N                                                 |
| CC2016      | Putative NADP-dependent oxidoreductase        |      | Y                        | Y                             | N                                                 |                                | N                                                 |                                | N                                                 |
| CC2017      | conserved hypothetical protein                |      | Y                        | N                             | N                                                 |                                | N                                                 |                                | N                                                 |
| CC2018      | Periplasmic glucan glucosyltransferase        |      | Y                        | Y                             | N                                                 |                                | N                                                 |                                | N                                                 |
|             | Molybdopterin-guanine dinucleotide            |      |                          |                               |                                                   |                                |                                                   |                                |                                                   |
| CC2019      | biosynthesis protein A                        |      | Y                        | Y                             | N                                                 |                                | N                                                 |                                | N                                                 |
| CC2020      | Na <sup>+</sup> driven multidrug efflux pump  |      | Y                        | Y                             | N                                                 |                                | N                                                 |                                | N                                                 |
| CC2021      | Conserved hypothetical protein                |      | Y                        | Y                             | N                                                 |                                | N                                                 |                                | N                                                 |
| CC2022      | Glyoxalase family protein                     |      | Y                        | Y                             | N                                                 |                                | N                                                 |                                | N                                                 |
| CC2023      | Glycosyl hydrolase                            |      | Y                        | N                             | N                                                 |                                | N                                                 |                                | N                                                 |
| CC2024      | Hypothetical cytosolic protein                |      | Y                        | Y                             | N                                                 |                                | N                                                 |                                | N                                                 |
| CC2025      | Conserved hypothetical protein                |      | N                        | N                             | N                                                 |                                | N                                                 |                                | N                                                 |
| CC2026      | Conserved hypothetical protein                |      | Y                        | Y                             | N                                                 |                                | N                                                 |                                | N                                                 |
| CC2027      | TonB-dependent outer membrane receptor        |      | Y                        | Y                             | N                                                 |                                | N                                                 |                                | N                                                 |
| CC2028      | TolB protein precursor/tail-specific protease |      | Y                        | Y                             | N                                                 |                                | N                                                 |                                | N                                                 |
| CC2029      | Thiamine biosynthesis protein thiC            | thiC | Y                        | Y                             | N                                                 |                                | N                                                 |                                | N                                                 |
| CC2030      | hypothetical protein                          |      | Y                        | Y                             | N                                                 |                                | N                                                 |                                | N                                                 |
| CC2031      | PilF-related tetratricopeptide repeat protein |      | Y                        | Y                             | N                                                 |                                | N                                                 |                                | N                                                 |
| CC2032      | D-cysteine desulphydrase                      |      | Y                        | Y                             | N                                                 |                                | N                                                 |                                | N                                                 |
| CC2033      | Aspartate racemase                            |      | Y                        | Y                             | N                                                 |                                | N                                                 |                                | N                                                 |
| CC2034      | hypothetical protein                          |      | Y                        | N                             | N                                                 |                                | N                                                 |                                | N                                                 |
| CC2035      | Secreted pectate lyase-family protein         |      | Y                        | Y                             | N                                                 |                                | N                                                 |                                | N                                                 |
|             | putative capsule polysaccharide biosynthesis  |      |                          |                               |                                                   |                                |                                                   |                                |                                                   |
| CC2036      | protein                                       |      | Y                        | Y                             | N                                                 |                                | N                                                 |                                | N                                                 |
| CC2037      | Polyketide cyclase/lipid transport protein    |      | Y                        | Y                             | N                                                 |                                | N                                                 |                                | N                                                 |
| CC2038      | ATP-dependent helicase, DinG family           |      | N                        | N                             | N                                                 |                                | N                                                 |                                | N                                                 |
| CC2039      | Tetratricopeptide repeat family protein       |      | Y                        | Y                             | N                                                 |                                | N                                                 |                                | N                                                 |
| CC2040      | ATP-dependent helicase                        |      | N                        | N                             | N                                                 |                                | N                                                 |                                | N                                                 |
| CC2041      | putative ICC-like phosphoesterases            |      | Y                        | Y                             | N                                                 |                                | N                                                 |                                | N                                                 |
| CC2042      | Transposase                                   |      | Y                        | N                             | N                                                 |                                | N                                                 |                                | N                                                 |
| CC2043      | Conserved hypothetical protein                |      | Y                        | N                             | N                                                 |                                | N                                                 |                                | N                                                 |
| CC2044      |                                               |      | Y                        | Y                             | N                                                 |                                | N                                                 |                                | N                                                 |
| CC2045      | polar development protein podJ                | podJ | N                        | N                             | N                                                 |                                | N                                                 |                                | N                                                 |
| CC2046      | Conserved hypothetical protein                |      | Y                        | Y                             | N                                                 |                                | N                                                 |                                | N                                                 |
| CC2047      | Oxacillin resistance-associated protein fmtC  |      | Y                        | Y                             | N                                                 |                                | N                                                 |                                | N                                                 |
| CC2048      |                                               |      | Y                        | Y                             | N                                                 |                                | N                                                 |                                | N                                                 |
| CC2049      | Acyl-CoA dehydrogenase                        |      | Y                        | Y                             | N                                                 |                                | N                                                 |                                | N                                                 |
|             | Acyl-CoA dehydrogenase, short-chain           |      |                          |                               |                                                   |                                |                                                   |                                |                                                   |
| CC2050      | specific                                      |      | Y                        | Y                             | N                                                 |                                | N                                                 |                                | N                                                 |
| CC2051      | Pyruvate kinase                               |      | Y                        | N                             | N                                                 |                                | N                                                 |                                | N                                                 |
| CC2052      | Glucan 1,4-beta-glucosidase                   | celD | Y                        | Y                             | N                                                 |                                | N                                                 |                                | N                                                 |
| CC2053      | Transcriptional regulator, LacI family        |      | Y                        | Y                             | N                                                 |                                | N                                                 |                                | N                                                 |
| CC2054      | Glucokinase                                   | glk  | Y                        | Y                             | N                                                 |                                | N                                                 |                                | N                                                 |
| CC2055      | Phosphogluconate dehydratase                  | edd  | N                        | N                             | N                                                 |                                | N                                                 |                                | N                                                 |
| CC2056      | 6-phosphogluconolactonase                     | pgl  | Y                        | Y                             | N                                                 |                                | N                                                 |                                | N                                                 |
| CC2057      | Glucose-6-phosphate 1-dehydrogenase           | zwf  | Y                        | Y                             | N                                                 |                                | N                                                 |                                | N                                                 |
| CC2058      | Endoglucanase H                               |      | N                        | N                             | N                                                 |                                | N                                                 |                                | N                                                 |
| CC2059      | Hypothetical protein                          |      | Y                        | N                             | N                                                 |                                | N                                                 |                                | N                                                 |
| CC2060      | polar flagellum positioning protein pflI      | pflI | Y                        | Y                             | Y                                                 | Bipolar and Unipolar           | N                                                 |                                | N                                                 |
| CC2061      | Flagellar motor switch protein fliM           | fliM | Y                        | Y                             | N                                                 |                                | N                                                 |                                | N                                                 |

| Gene Number | Annotation                                                          | Gene | Entry Vector Constructed | Entry Vector Sequence Correct | Localized and Sequence-verified C-terminal Fusion | Localization w/ C-terminal Tag | Localized and Sequence-verified N-terminal Fusion | Localization w/ N-terminal Tag | Protein Localized as Both N- or C-terminal Fusion |
|-------------|---------------------------------------------------------------------|------|--------------------------|-------------------------------|---------------------------------------------------|--------------------------------|---------------------------------------------------|--------------------------------|---------------------------------------------------|
| CC2062      | Flagellar filL protein                                              | filL | Y                        | Y                             | N                                                 |                                | N                                                 |                                | N                                                 |
| CC2063      | Flagellar basal-body rod protein flgF                               | flgF | Y                        | Y                             | N                                                 |                                | N                                                 |                                | N                                                 |
| CC2064      | Flagellar basal-body rod protein flgG                               | flgG | Y                        | Y                             | N                                                 |                                | N                                                 |                                | N                                                 |
|             | Flagella basal body P ring formation protein                        |      |                          |                               |                                                   |                                |                                                   |                                |                                                   |
| CC2065      | flgA                                                                | flgA | N                        | N                             | N                                                 |                                | N                                                 |                                | N                                                 |
| CC2066      | Flagellar L-ring protein flgH                                       | flgH | N                        | N                             | N                                                 |                                | N                                                 |                                | N                                                 |
| CC2067      | hypothetical protein                                                |      | Y                        | Y                             | N                                                 |                                | N                                                 |                                | N                                                 |
| CC2068      | 1-deoxy-D-xylulose 5-phosphate synthase                             | dxs  | N                        | N                             | N                                                 |                                | N                                                 |                                | N                                                 |
|             | Dimethylallyltransferase / Geranyltransferase                       |      | Y                        | Y                             | N                                                 |                                | N                                                 |                                | N                                                 |
| CC2069      | Exodeoxyribonuclease VII small subunit                              |      | Y                        | Y                             | Y                                                 | Middle OR Pole                 | Y                                                 | Middle OR Pole                 | Y                                                 |
| CC2071      | phosphoglycerate mutase                                             |      | Y                        | N                             | N                                                 |                                | N                                                 |                                | N                                                 |
| CC2072      | Acetylspermidine deacetylase                                        |      | Y                        | N                             | N                                                 |                                | N                                                 |                                | N                                                 |
|             | Protease synthase and sporulation negative regulatory protein PAI 1 |      | Y                        | N                             | N                                                 |                                | N                                                 |                                | N                                                 |
| CC2073      | Hypothetical protein                                                |      | Y                        | Y                             | N                                                 |                                | N                                                 |                                | N                                                 |
| CC2074      | Conserved hypothetical protein                                      |      | Y                        | Y                             | N                                                 |                                | N                                                 |                                | N                                                 |
| CC2075      | Transcriptional regulator                                           |      | Y                        | Y                             | N                                                 |                                | N                                                 |                                | N                                                 |
| CC2076      | Putative rhamnosyl transferase                                      |      | N                        | N                             | N                                                 |                                | N                                                 |                                | N                                                 |
| CC2077      | hypothetical protein                                                |      | Y                        | Y                             | N                                                 |                                | N                                                 |                                | N                                                 |
| CC2078      | hypothetical protein                                                |      | Y                        | Y                             | N                                                 |                                | N                                                 |                                | N                                                 |
| CC2079      | Transcriptional regulator, TetR family                              |      | Y                        | Y                             | N                                                 |                                | N                                                 |                                | N                                                 |
| CC2080      | hypothetical protein                                                |      | Y                        | Y                             | N                                                 |                                | N                                                 |                                | N                                                 |
| CC2081      | Leucine dehydrogenase                                               |      | Y                        | Y                             | N                                                 |                                | N                                                 |                                | N                                                 |
| CC2082      | Esterase/Lipase                                                     |      | Y                        | Y                             | N                                                 |                                | N                                                 |                                | N                                                 |
| CC2083      | Uracil DNA glycosylase superfamily protein                          |      | Y                        | Y                             | N                                                 |                                | N                                                 |                                | N                                                 |
| CC2084      | Glutathione S-transferase                                           |      | Y                        | Y                             | N                                                 |                                | N                                                 |                                | N                                                 |
| CC2085      | hypothetical protein                                                |      | Y                        | Y                             | N                                                 |                                | N                                                 |                                | N                                                 |
| CC2086      | Thioesterase superfamily protein                                    |      | Y                        | N                             | N                                                 |                                | N                                                 |                                | N                                                 |
| CC2087      | Glutathione S-transferase                                           |      | Y                        | Y                             | N                                                 |                                | Y                                                 | Middle OR Pole                 | N                                                 |
| CC2088      | Nucleoside permease nupC                                            |      | Y                        | Y                             | N                                                 |                                | N                                                 |                                | N                                                 |
| CC2089      | Transporter                                                         |      | Y                        | Y                             | N                                                 |                                | N                                                 |                                | N                                                 |
| CC2090      | ABC transporter ATP-binding protein                                 |      | Y                        | Y                             | N                                                 |                                | N                                                 |                                | N                                                 |
| CC2091      | Multidrug resistance efflux pump                                    |      | Y                        | Y                             | N                                                 |                                | Y                                                 | Patchy/Spotty                  | N                                                 |
| CC2092      | Short-chain alcohol dehydrogenase                                   |      | Y                        | Y                             | N                                                 |                                | N                                                 |                                | N                                                 |
| CC2093      | Long-chain fatty acid transport protein precursor                   |      | Y                        | N                             | N                                                 |                                | N                                                 |                                | N                                                 |
| CC2094      | Iron-sulfur cluster assembly/repair protein                         |      | Y                        | Y                             | N                                                 |                                | N                                                 |                                | N                                                 |
| CC2095      | ApbC                                                                |      | Y                        | Y                             | N                                                 |                                | N                                                 |                                | N                                                 |
|             | Phosphatase/phosphohexomutase family protein                        |      | Y                        | Y                             | N                                                 |                                | N                                                 |                                | N                                                 |
| CC2096      | Phosphoserine phosphatase                                           |      | Y                        | Y                             | N                                                 |                                | N                                                 |                                | N                                                 |
| CC2097      | tRNA delta(2)-isopentenylpyrophosphate transferase                  |      | Y                        | Y                             | Y                                                 | Bipolar and Unipolar           | Y                                                 | Bipolar and Unipolar           | Y                                                 |
| CC2098      | competence damage-inducible protein cinA                            |      | Y                        | Y                             | N                                                 |                                | N                                                 |                                | N                                                 |
| CC2099      | Acetolactate synthase large subunit                                 |      | Y                        | Y                             | N                                                 |                                | N                                                 |                                | N                                                 |
| CC2100      | Acetolactate synthase small subunit                                 |      | Y                        | Y                             | N                                                 |                                | N                                                 |                                | N                                                 |
| CC2101      | Hypothetical protein                                                |      | Y                        | Y                             | N                                                 |                                | N                                                 |                                | N                                                 |
| CC2102      | Hypothetical cytosolic protein                                      |      | Y                        | Y                             | N                                                 |                                | N                                                 |                                | N                                                 |
| CC2103      | Peptidase, C13 family                                               |      | N                        | N                             | N                                                 |                                | N                                                 |                                | N                                                 |
| CC2104      | Penicillin-binding protein                                          |      | Y                        | N                             | N                                                 |                                | N                                                 |                                | N                                                 |
| CC2105      | Hypothetical protein                                                |      | Y                        | Y                             | N                                                 |                                | N                                                 |                                | N                                                 |
| CC2106      | Hypothetical protein                                                |      | Y                        | Y                             | N                                                 |                                | N                                                 |                                | N                                                 |
| CC2107      | Hypothetical protein                                                |      | Y                        | Y                             | N                                                 |                                | N                                                 |                                | N                                                 |

| Gene Number | Annotation                                                                                                                   | Gene | Entry Vector Constructed | Entry Vector Sequence Correct | Localized and Sequence-verified C-terminal Fusion | Localization w/ C-terminal Tag | Localized and Sequence-verified N-terminal Fusion | Localization w/ N-terminal Tag | Protein Localized as Both N- or C-terminal Fusion |
|-------------|------------------------------------------------------------------------------------------------------------------------------|------|--------------------------|-------------------------------|---------------------------------------------------|--------------------------------|---------------------------------------------------|--------------------------------|---------------------------------------------------|
| CC2108      | Hypothetical protein                                                                                                         |      | Y                        | Y                             | N                                                 |                                | Y                                                 | Middle OR Pole                 | N                                                 |
| CC2109      | Fumarate hydratase                                                                                                           |      | Y                        | Y                             | N                                                 |                                | N                                                 |                                | N                                                 |
| CC2110      | Acetyltransferase                                                                                                            |      | Y                        | Y                             | N                                                 |                                | N                                                 |                                | N                                                 |
| CC2111      | Hypothetical membrane spanning protein                                                                                       |      | Y                        | Y                             | N                                                 |                                | N                                                 |                                | N                                                 |
| CC2112      | hypothetical protein<br>Farnesyl pyrophosphate synthetase /<br>Geranyltranstransferase /<br>Farnesyltransferase / Decaprenyl |      | Y                        | Y                             | N                                                 |                                | N                                                 |                                | N                                                 |
| CC2113      | diphosphate synthase                                                                                                         |      | N                        | N                             | N                                                 |                                | N                                                 |                                | N                                                 |
| CC2114      | Methyltransferase                                                                                                            |      | Y                        | Y                             | N                                                 |                                | N                                                 |                                | N                                                 |
| CC2115      | cytochrome c-family protein                                                                                                  |      | Y                        | Y                             | N                                                 |                                | N                                                 |                                | N                                                 |
| CC2116      |                                                                                                                              |      | Y                        | Y                             | N                                                 |                                | N                                                 |                                | N                                                 |
| CC2117      | Hypothetical exported protein                                                                                                |      | Y                        | Y                             | N                                                 |                                | N                                                 |                                | N                                                 |
| CC2118      | Conserved hypothetical protein                                                                                               |      | Y                        | Y                             | N                                                 |                                | N                                                 |                                | N                                                 |
| CC2119      | Hypothetical exported protein                                                                                                |      | Y                        | Y                             | N                                                 |                                | N                                                 |                                | N                                                 |
| CC2120      | Ketol-acid reductoisomerase / 2-<br>dehydropanoate 2-reductase                                                               |      | Y                        | Y                             | N                                                 |                                | N                                                 |                                | N                                                 |
| CC2121      | Conserved hypothetical protein                                                                                               |      | Y                        | N                             | N                                                 |                                | N                                                 |                                | N                                                 |
| CC2122      |                                                                                                                              |      | Y                        | Y                             | N                                                 |                                | N                                                 |                                | N                                                 |
| CC2123      | Conserved hypothetical protein                                                                                               |      | Y                        | Y                             | N                                                 |                                | N                                                 |                                | N                                                 |
| CC2124      | Thymidylate synthase                                                                                                         |      | Y                        | Y                             | N                                                 |                                | N                                                 |                                | N                                                 |
| CC2125      | Quinone oxidoreductase                                                                                                       |      | N                        | N                             | N                                                 |                                | N                                                 |                                | N                                                 |
| CC2126      | Dihydrofolate reductase                                                                                                      |      | Y                        | Y                             | N                                                 |                                | N                                                 |                                | N                                                 |
| CC2127      | Conserved hypothetical protein                                                                                               |      | N                        | N                             | N                                                 |                                | N                                                 |                                | N                                                 |
| CC2128      | ANTIBIOTIC-INDUCED PROTEIN, Drp35                                                                                            |      | Y                        | Y                             | N                                                 |                                | N                                                 |                                | N                                                 |
| CC2129      | NADH dehydrogenase                                                                                                           |      | Y                        | N                             | N                                                 |                                | N                                                 |                                | N                                                 |
| CC2130      | hypothetical protein                                                                                                         |      | Y                        | Y                             | N                                                 |                                | N                                                 |                                | N                                                 |
| CC2131      | Acyl-CoA dehydrogenase                                                                                                       |      | N                        | N                             | N                                                 |                                | N                                                 |                                | N                                                 |
| CC2132      | ABM family monooxygenase                                                                                                     |      | Y                        | Y                             | N                                                 |                                | N                                                 |                                | N                                                 |
| CC2133      | hypothetical protein                                                                                                         |      | Y                        | Y                             | N                                                 |                                | N                                                 |                                | N                                                 |
| CC2134      | DnaJ-like protein djIA                                                                                                       |      | Y                        | Y                             | N                                                 |                                | N                                                 |                                | N                                                 |
| CC2135      |                                                                                                                              |      | N                        | N                             | N                                                 |                                | N                                                 |                                | N                                                 |
| CC2136      | Beta-glucosidase                                                                                                             |      | Y                        | N                             | N                                                 |                                | N                                                 |                                | N                                                 |
| CC2137      | Methionine synthase I meth<br>5-methyltetrahydrofolate--homocysteine<br>methyltransferase homocysteine-binding<br>subunit    |      | N                        | N                             | N                                                 |                                | N                                                 |                                | N                                                 |
| CC2138      | Beta-lactamase, type II                                                                                                      |      | Y                        | Y                             | N                                                 |                                | N                                                 |                                | N                                                 |
| CC2139      | Methylenetetrahydrofolate reductase                                                                                          |      | Y                        | Y                             | N                                                 |                                | N                                                 |                                | N                                                 |
| CC2140      | Transcriptional regulator, ArsR family / SAM-<br>dependent methyltransferase                                                 |      | Y                        | Y                             | N                                                 |                                | N                                                 |                                | N                                                 |
| CC2141      | Glyoxalase family protein                                                                                                    |      | Y                        | Y                             | N                                                 |                                | N                                                 |                                | N                                                 |
| CC2142      | Transcriptional regulator, LysR family                                                                                       |      | Y                        | Y                             | N                                                 |                                | N                                                 |                                | N                                                 |
| CC2143      | NTF2 enzyme family protein                                                                                                   |      | Y                        | Y                             | N                                                 |                                | N                                                 |                                | N                                                 |
| CC2144      |                                                                                                                              |      | Y                        | Y                             | Y                                                 | Variable Focus                 | N                                                 |                                | N                                                 |
| CC2145      | putative carboxymuconolactone<br>decarboxylase family protein                                                                |      | Y                        | Y                             | N                                                 |                                | N                                                 |                                | N                                                 |
| CC2146      | Gluconate 2-dehydrogenase                                                                                                    |      | Y                        | N                             | N                                                 |                                | N                                                 |                                | N                                                 |
| CC2147      | ABC transporter ATP-binding protein                                                                                          |      | Y                        | Y                             | N                                                 |                                | N                                                 |                                | N                                                 |
| CC2148      | TonB-dependent receptor                                                                                                      |      | Y                        | Y                             | N                                                 |                                | N                                                 |                                | N                                                 |
| CC2149      | Signal peptidase I                                                                                                           |      | Y                        | Y                             | N                                                 |                                | N                                                 |                                | N                                                 |
| CC2150      | hypothetical protein                                                                                                         |      | Y                        | Y                             | N                                                 |                                | N                                                 |                                | N                                                 |
| CC2151      | Putative secreted protein                                                                                                    |      | N                        | N                             | N                                                 |                                | N                                                 |                                | N                                                 |
| CC2152      |                                                                                                                              |      |                          |                               |                                                   |                                |                                                   |                                |                                                   |

| Gene Number | Annotation                                                  | Gene | Entry Vector Constructed | Entry Vector Sequence Correct | Localized and Sequence-verified C-terminal Fusion | Localization w/ C-terminal Tag | Localized and Sequence-verified N-terminal Fusion | Localization w/ N-terminal Tag | Protein Localized as Both N- or C-terminal Fusion |
|-------------|-------------------------------------------------------------|------|--------------------------|-------------------------------|---------------------------------------------------|--------------------------------|---------------------------------------------------|--------------------------------|---------------------------------------------------|
| CC2153      | Polysaccharide deacetylase family                           |      | Y                        | Y                             | N                                                 |                                | N                                                 |                                | N                                                 |
| CC2154      | Xaa-Pro dipeptidyl-peptidase                                |      | Y                        | Y                             | N                                                 |                                | N                                                 |                                | N                                                 |
| CC2155      | hypothetical protein                                        |      | Y                        | N                             | N                                                 |                                | N                                                 |                                | N                                                 |
| CC2156      | Hypothetical cytosolic protein                              |      | Y                        | Y                             | N                                                 |                                | N                                                 |                                | N                                                 |
|             | Glycerophosphoryl diester phosphodiesterase                 |      | Y                        | Y                             | N                                                 |                                | N                                                 |                                | N                                                 |
| CC2157      |                                                             |      | Y                        | Y                             | N                                                 |                                | N                                                 |                                | N                                                 |
| CC2158      | Translation initiation inhibitor                            |      | Y                        | Y                             | N                                                 |                                | N                                                 |                                | N                                                 |
| CC2159      | PHB granule-associated protein, phasin2                     |      | Y                        | Y                             | N                                                 |                                | N                                                 |                                | N                                                 |
| CC2160      |                                                             |      | Y                        | Y                             | Y                                                 | Patchy/Spotty                  | Y                                                 | Patchy/Spotty                  | Y                                                 |
|             | D-alanyl-D-alanine serine-type carboxypeptidase             |      | Y                        | Y                             | N                                                 |                                | N                                                 |                                | N                                                 |
| CC2161      |                                                             |      | Y                        | Y                             | N                                                 |                                | N                                                 |                                | N                                                 |
| CC2162      | Aminotransferase class I family                             |      | N                        | N                             | N                                                 |                                | N                                                 |                                | N                                                 |
| CC2163      | Molecular chaperones (DnaJ family)                          |      | Y                        | Y                             | N                                                 |                                | N                                                 |                                | N                                                 |
| CC2164      | division plane positioning ATPase mipZ                      |      | Y                        | Y                             | N                                                 |                                | N                                                 |                                | N                                                 |
| CC2165      | Pantoate--beta-alanine ligase                               |      | Y                        | Y                             | N                                                 |                                | Y                                                 | Bipolar and Unipolar           | N                                                 |
| CC2166      | hypothetical protein                                        |      | Y                        | Y                             | N                                                 |                                | N                                                 |                                | N                                                 |
| CC2167      | Hypothetical cytosolic protein                              |      | Y                        | Y                             | N                                                 |                                | N                                                 |                                | N                                                 |
|             | Methylcrotonyl-CoA carboxylase biotin-containing subunit    |      | Y                        | Y                             | N                                                 |                                | N                                                 |                                | N                                                 |
| CC2168      |                                                             |      | Y                        | Y                             | N                                                 |                                | N                                                 |                                | N                                                 |
| CC2169      | Methylglutaconyl-CoA hydratase                              |      | Y                        | Y                             | N                                                 |                                | N                                                 |                                | N                                                 |
|             | Methylcrotonyl-CoA carboxylase carboxyl transferase subunit |      | Y                        | Y                             | N                                                 |                                | N                                                 |                                | N                                                 |
| CC2170      |                                                             |      | Y                        | Y                             | N                                                 |                                | N                                                 |                                | N                                                 |
| CC2171      | cAMP/cGMP binding protein                                   |      | Y                        | Y                             | N                                                 |                                | N                                                 |                                | N                                                 |
| CC2172      | Isovaleryl-CoA dehydrogenase                                |      | N                        | N                             | N                                                 |                                | N                                                 |                                | N                                                 |
| CC2173      | lysozyme-family localization factor spmX                    | spmX | N                        | N                             | N                                                 |                                | N                                                 |                                | N                                                 |
| CC2174      | Mg2+ transporter mgtE                                       |      | Y                        | Y                             | N                                                 |                                | Y                                                 | Patchy/Spotty                  | N                                                 |
| CC2175      | Flagellar motor switch protein fliN                         | fliN | N                        | N                             | N                                                 |                                | N                                                 |                                | N                                                 |
| CC2176      | Lipoate-protein ligase B                                    |      | N                        | N                             | N                                                 |                                | N                                                 |                                | N                                                 |
| CC2177      | hypothetical protein                                        |      | Y                        | Y                             | N                                                 |                                | N                                                 |                                | N                                                 |
| CC2178      | Conserved membrane protein, DUF805                          |      | Y                        | Y                             | N                                                 |                                | N                                                 |                                | N                                                 |
|             | Propionyl-CoA carboxylase biotin-containing subunit         |      | Y                        | Y                             | Y                                                 | Middle OR Pole                 | N                                                 |                                | N                                                 |
| CC2179      |                                                             |      | Y                        | Y                             | N                                                 |                                | N                                                 |                                | N                                                 |
| CC2180      | Laminin G Domain protein                                    |      | N                        | N                             | N                                                 |                                | N                                                 |                                | N                                                 |
| CC2181      | Protein glcG                                                |      | Y                        | Y                             | Y                                                 | Patchy/Spotty                  | N                                                 |                                | N                                                 |
| CC2182      | ThiJ/Pfpl family                                            |      | Y                        | Y                             | N                                                 |                                | N                                                 |                                | N                                                 |
| CC2183      | Peptide methionine sulfoxide reductase msrB                 |      | Y                        | Y                             | N                                                 |                                | N                                                 |                                | N                                                 |
| CC2184      | Glutathione S-transferase GST                               |      | N                        | N                             | N                                                 |                                | N                                                 |                                | N                                                 |
| CC2185      | Hypothetical protein                                        |      | N                        | N                             | N                                                 |                                | N                                                 |                                | N                                                 |
| CC2186      | Laminin G Domain protein                                    |      | Y                        | Y                             | N                                                 |                                | N                                                 |                                | N                                                 |
| CC2187      | L-aminopeptidase/D-esterase dmpA                            |      | N                        | N                             | N                                                 |                                | N                                                 |                                | N                                                 |
| CC2188      | Transcriptional regulator, MarR family                      |      | Y                        | Y                             | Y                                                 | Patchy/Spotty                  | N                                                 |                                | N                                                 |
| CC2189      | hypothetical protein                                        |      | Y                        | Y                             | N                                                 |                                | N                                                 |                                | N                                                 |
| CC2190      | hypothetical protein                                        |      | Y                        | N                             | N                                                 |                                | N                                                 |                                | N                                                 |
| CC2191      | Glutathione peroxidase                                      |      | Y                        | Y                             | N                                                 |                                | N                                                 |                                | N                                                 |
| CC2192      | EF-Hand domain protein                                      |      | Y                        | Y                             | N                                                 |                                | N                                                 |                                | N                                                 |
| CC2193      | Hypothetical membrane spanning protein                      |      | Y                        | Y                             | N                                                 |                                | N                                                 |                                | N                                                 |
| CC2194      | Hemin receptor                                              |      | Y                        | N                             | N                                                 |                                | N                                                 |                                | N                                                 |
|             | Putative membrane-associated alkaline phosphatase           |      | Y                        | Y                             | N                                                 |                                | N                                                 |                                | N                                                 |
| CC2195      |                                                             |      | Y                        | Y                             | N                                                 |                                | N                                                 |                                | N                                                 |
| CC2196      | Disulfide bond formation protein B                          |      | Y                        | Y                             | N                                                 |                                | N                                                 |                                | N                                                 |
|             | 2-polyprenyl-3-methyl-6-methoxy-1,4-benzoquinol hydroxylase |      | Y                        | Y                             | N                                                 |                                | N                                                 |                                | N                                                 |
| CC2197      |                                                             |      | Y                        | Y                             | N                                                 |                                | N                                                 |                                | N                                                 |
| CC2198      | Membrane alanine aminopeptidase                             |      | Y                        | Y                             | N                                                 |                                | N                                                 |                                | N                                                 |

| Gene Number | Annotation                                                                    | Gene  | Entry Vector Constructed | Entry Vector Sequence Correct | Localized and Sequence-verified C-terminal Fusion | Localization w/ C-terminal Tag | Localized and Sequence-verified N-terminal Fusion | Localization w/ N-terminal Tag | Protein Localized as Both N- or C-terminal Fusion |
|-------------|-------------------------------------------------------------------------------|-------|--------------------------|-------------------------------|---------------------------------------------------|--------------------------------|---------------------------------------------------|--------------------------------|---------------------------------------------------|
| CC2199      | Conserved hypothetical protein                                                |       | N                        | N                             | N                                                 |                                | N                                                 |                                | N                                                 |
| CC2200      | HNH endonuclease family protein                                               |       | Y                        | Y                             | N                                                 |                                | N                                                 |                                | N                                                 |
| CC2201      | DNA-3-methyladenine glycosylase II                                            |       | Y                        | Y                             | Y                                                 | Middle OR Pole                 | N                                                 |                                | N                                                 |
| CC2202      | Transcription elongation factor greB                                          |       | Y                        | Y                             | N                                                 |                                | N                                                 |                                | N                                                 |
| CC2203      | hypothetical protein                                                          |       | Y                        | Y                             | N                                                 |                                | N                                                 |                                | N                                                 |
| CC2204      | Transcriptional regulator, TetR family                                        |       | Y                        | Y                             | N                                                 |                                | N                                                 |                                | N                                                 |
| CC2205      | tRNA synthetases class I, catalytic domain                                    |       | Y                        | Y                             | N                                                 |                                | N                                                 |                                | N                                                 |
| CC2206      | Transcriptional regulators, MarR/EmrR family                                  |       | Y                        | Y                             | N                                                 |                                | N                                                 |                                | N                                                 |
| CC2207      | Hypothetical protein                                                          |       | Y                        | Y                             | N                                                 |                                | N                                                 |                                | N                                                 |
| CC2208      | Hypothetical protein                                                          |       | Y                        | Y                             | N                                                 |                                | N                                                 |                                | N                                                 |
| CC2209      | Acetyltransferase                                                             |       | Y                        | Y                             | N                                                 |                                | N                                                 |                                | N                                                 |
| CC2210      | Thiol:disulfide interchange protein tlpA                                      |       | Y                        | Y                             | N                                                 |                                | N                                                 |                                | N                                                 |
| CC2211      | Argininosuccinate lyase                                                       |       | Y                        | Y                             | N                                                 |                                | N                                                 |                                | N                                                 |
| CC2212      | hypothetical protein                                                          |       | Y                        | N                             | N                                                 |                                | N                                                 |                                | N                                                 |
| CC2213      | Diaminopimelate decarboxylase<br>Hypoxanthine-guanine                         |       | Y                        | Y                             | N                                                 |                                | N                                                 |                                | N                                                 |
| CC2214      | phosphoribosyltransferase                                                     |       | Y                        | Y                             | N                                                 |                                | N                                                 |                                | N                                                 |
| CC2215      | MJ0042 family finger-like domain protein                                      |       | Y                        | N                             | N                                                 |                                | N                                                 |                                | N                                                 |
| CC2216      | Cell division ATP-binding protein ftsE                                        |       | Y                        | Y                             | N                                                 |                                | N                                                 |                                | N                                                 |
| CC2217      | Cell division protein ftsX                                                    |       | Y                        | Y                             | N                                                 |                                | N                                                 |                                | N                                                 |
| CC2218      | Hypothetical protein<br>1-acyl-sn-glycerol-3-phosphate                        |       | Y                        | Y                             | N                                                 |                                | N                                                 |                                | N                                                 |
| CC2219      | acyltransferase                                                               |       | Y                        | Y                             | N                                                 |                                | N                                                 |                                | N                                                 |
| CC2220      | Cation transport protein chaC                                                 |       | Y                        | Y                             | N                                                 |                                | N                                                 |                                | N                                                 |
| CC2221      | Conserved hypothetical protein                                                |       | Y                        | Y                             | N                                                 |                                | N                                                 |                                | N                                                 |
| CC2222      | chorismate mutase-family protein                                              |       | Y                        | Y                             | N                                                 |                                | N                                                 |                                | N                                                 |
| CC2223      | Histidinol-phosphate aminotransferase<br>Arogenate dehydrogenase / Prephenate |       | Y                        | Y                             | N                                                 |                                | N                                                 |                                | N                                                 |
| CC2224      | dehydrogenase                                                                 |       | N                        | N                             | N                                                 |                                | N                                                 |                                | N                                                 |
| CC2225      | Conserved hypothetical protein                                                |       | N                        | N                             | N                                                 |                                | N                                                 |                                | N                                                 |
| CC2226      | EF hand domain protein                                                        |       | Y                        | N                             | N                                                 |                                | N                                                 |                                | N                                                 |
| CC2227      | cellulose 1,4-beta-cellobiosidase                                             |       | Y                        | Y                             | N                                                 |                                | N                                                 |                                | N                                                 |
| CC2228      | Hypothetical cytosolic protein                                                |       | Y                        | Y                             | N                                                 |                                | N                                                 |                                | N                                                 |
| CC2229      | SLA2 protein                                                                  |       | Y                        | Y                             | N                                                 |                                | N                                                 |                                | N                                                 |
| CC2230      | alpha/beta hydrolase-family protein                                           |       | N                        | N                             | N                                                 |                                | N                                                 |                                | N                                                 |
| CC2231      | hypothetical protein                                                          |       | Y                        | Y                             | N                                                 |                                | N                                                 |                                | N                                                 |
| CC2232      | Transcriptional regulator, Cro/Ci family                                      |       | Y                        | Y                             | N                                                 |                                | N                                                 |                                | N                                                 |
| CC2233      | Conserved hypothetical protein                                                |       | Y                        | Y                             | N                                                 |                                | N                                                 |                                | N                                                 |
| CC2234      | Conserved hypothetical protein                                                |       | Y                        | Y                             | N                                                 |                                | N                                                 |                                | N                                                 |
| CC2235      | hypothetical protein                                                          |       | N                        | N                             | N                                                 |                                | N                                                 |                                | N                                                 |
| CC2236      | hypothetical protein                                                          |       | Y                        | Y                             | N                                                 |                                | N                                                 |                                | N                                                 |
| CC2237      | Deoxycytidine triphosphate deaminase                                          |       | N                        | N                             | N                                                 |                                | N                                                 |                                | N                                                 |
| CC2238      | O-succinylhomoserine sulfhydrylase                                            |       | Y                        | Y                             | N                                                 |                                | N                                                 |                                | N                                                 |
| CC2239      | ApaG protein                                                                  |       | Y                        | Y                             | N                                                 |                                | N                                                 |                                | N                                                 |
| CC2240      | Hypothetical protein                                                          |       | Y                        | Y                             | N                                                 |                                | N                                                 |                                | N                                                 |
| CC2241      | Heat shock protein 33 hsp33                                                   | hsp33 | Y                        | Y                             | N                                                 |                                | N                                                 |                                | N                                                 |
| CC2242      | Ornithine carbamoyltransferase<br>Acetylmornithine aminotransferase /         |       | N                        | N                             | N                                                 |                                | N                                                 |                                | N                                                 |
| CC2243      | Succinyldiaminopimelate aminotransferase                                      |       | Y                        | N                             | N                                                 |                                | N                                                 |                                | N                                                 |
| CC2244      | ABC transporter permease protein                                              |       | Y                        | Y                             | N                                                 |                                | N                                                 |                                | N                                                 |
| CC2245      | Hypothetical protein                                                          |       | Y                        | N                             | N                                                 |                                | N                                                 |                                | N                                                 |
| CC2246      | Exodeoxyribonuclease VII large subunit                                        |       | Y                        | Y                             | Y                                                 | Central - Focus                | Y                                                 | Central - Focus                | Y                                                 |
| CC2247      | Hypothetical protein                                                          |       | Y                        | Y                             | N                                                 |                                | N                                                 |                                | N                                                 |



| Gene Number | Annotation                                                                                              | Gene | Entry Vector Constructed | Entry Vector Sequence Correct | Localized and Sequence-verified C-terminal Fusion | Localization w/ C-terminal Tag | Localized and Sequence-verified N-terminal Fusion | Localization w/ N-terminal Tag | Protein Localized as Both N- or C-terminal Fusion |
|-------------|---------------------------------------------------------------------------------------------------------|------|--------------------------|-------------------------------|---------------------------------------------------|--------------------------------|---------------------------------------------------|--------------------------------|---------------------------------------------------|
| CC2248      | Peptidoglycan-specific endopeptidase, M23 family                                                        |      | Y                        | Y                             | N                                                 |                                | N                                                 |                                | N                                                 |
| CC2249      | chemotaxis receiver protein cheYIII                                                                     |      | N                        | N                             | N                                                 |                                | N                                                 |                                | N                                                 |
| CC2250      | Lipid A biosynthesis lauroyl acyltransferase                                                            |      | Y                        | Y                             | N                                                 |                                | N                                                 |                                | N                                                 |
| CC2251      | Transcriptional regulator of stalk biogenesis staR                                                      | staR | Y                        | Y                             | N                                                 |                                | N                                                 |                                | N                                                 |
| CC2252      | Myo-inositol-1(or 4)-monophosphatase                                                                    |      | N                        | N                             | N                                                 |                                | N                                                 |                                | N                                                 |
| CC2253      | Lysophospholipase L2                                                                                    |      | Y                        | Y                             | N                                                 |                                | N                                                 |                                | N                                                 |
| CC2254      | Nonspecific lipid-transfer protein                                                                      |      | N                        | N                             | N                                                 |                                | N                                                 |                                | N                                                 |
| CC2255      | hypothetical protein                                                                                    |      | Y                        | Y                             | N                                                 |                                | N                                                 |                                | N                                                 |
| CC2256      |                                                                                                         |      | N                        | N                             | N                                                 |                                | N                                                 |                                | N                                                 |
| CC2257      | Methyltransferase                                                                                       |      | Y                        | Y                             | N                                                 |                                | N                                                 |                                | N                                                 |
| CC2258      | Small heat shock protein                                                                                |      | Y                        | Y                             | N                                                 |                                | N                                                 |                                | N                                                 |
| CC2259      | Hypothetical protein with pentapeptide repeats                                                          |      | Y                        | Y                             | N                                                 |                                | N                                                 |                                | N                                                 |
| CC2260      | Hypothetical protein with pentapeptide repeats                                                          |      | N                        | N                             | N                                                 |                                | N                                                 |                                | N                                                 |
| CC2261      | Phosphoglycerate mutase                                                                                 |      | N                        | N                             | N                                                 |                                | N                                                 |                                | N                                                 |
| CC2262      | Hypothetical protein                                                                                    |      | Y                        | Y                             | N                                                 |                                | N                                                 |                                | N                                                 |
| CC2263      | Arabinose-5-phosphate isomerase                                                                         |      | N                        | N                             | N                                                 |                                | N                                                 |                                | N                                                 |
| CC2264      | Phosphomannomutase                                                                                      |      | Y                        | Y                             | N                                                 |                                | N                                                 |                                | N                                                 |
| CC2265      | Acetyltransferase, GNAT family                                                                          |      | Y                        | Y                             | N                                                 |                                | N                                                 |                                | N                                                 |
| CC2266      | Bark storage protein A precursor                                                                        |      | Y                        | Y                             | N                                                 |                                | N                                                 |                                | N                                                 |
| CC2267      | Dabb-family alpha/beta stress response protein                                                          |      | Y                        | Y                             | N                                                 |                                | N                                                 |                                | N                                                 |
| CC2268      | Uracil phosphoribosyltransferase                                                                        |      | Y                        | Y                             | N                                                 |                                | N                                                 |                                | N                                                 |
| CC2269      | Membrane-bound aldehyde dehydrogenase, large subunit                                                    |      | Y                        | Y                             | N                                                 |                                | N                                                 |                                | N                                                 |
| CC2270      | Membrane-bound aldehyde dehydrogenase iron-sulfur protein                                               |      | Y                        | Y                             | N                                                 |                                | N                                                 |                                | N                                                 |
| CC2271      | Phosphohydrolase (MutT/nudix family protein)                                                            |      | Y                        | Y                             | N                                                 |                                | N                                                 |                                | N                                                 |
| CC2272      | Endonuclease III                                                                                        |      | Y                        | N                             | N                                                 |                                | N                                                 |                                | N                                                 |
| CC2273      | D-alanyl-D-alanine dipeptidase                                                                          |      | Y                        | Y                             | N                                                 |                                | N                                                 |                                | N                                                 |
| CC2274      | Malonate-semialdehyde dehydrogenase (acylating) / Methylmalonate-semialdehyde dehydrogenase (acylating) |      | Y                        | Y                             | N                                                 |                                | N                                                 |                                | N                                                 |
| CC2275      | FMN reductase                                                                                           |      | N                        | N                             | N                                                 |                                | N                                                 |                                | N                                                 |
| CC2276      | Conserved hypothetical protein                                                                          |      | N                        | N                             | N                                                 |                                | N                                                 |                                | N                                                 |
| CC2277      | beta-D-Glcp beta-1,4-glucosyltransferase                                                                |      | Y                        | Y                             | N                                                 |                                | N                                                 |                                | N                                                 |
| CC2278      | polysaccharide biosynthesis protein celD                                                                |      | Y                        | Y                             | N                                                 |                                | N                                                 |                                | N                                                 |
| CC2279      | GAF domain-containing proteins                                                                          |      | Y                        | Y                             | N                                                 |                                | N                                                 |                                | N                                                 |
| CC2280      | hypothetical protein                                                                                    |      | N                        | N                             | N                                                 |                                | N                                                 |                                | N                                                 |
| CC2281      | Methyl-accepting chemotaxis protein                                                                     |      | Y                        | Y                             | Y                                                 | Pole                           | N                                                 |                                | N                                                 |
| CC2282      | Glucosylase                                                                                             |      | Y                        | Y                             | N                                                 |                                | N                                                 |                                | N                                                 |
| CC2283      | Cytoplasmic membrane maltose transporter malY                                                           | malY | Y                        | Y                             | N                                                 |                                | N                                                 |                                | N                                                 |
| CC2284      | Maltose transport transcriptional repressor mall                                                        | mall | Y                        | Y                             | N                                                 |                                | N                                                 |                                | N                                                 |
| CC2285      | Alpha-glucosidase                                                                                       |      | N                        | N                             | N                                                 |                                | N                                                 |                                | N                                                 |
| CC2286      | Alpha-amylase                                                                                           |      | Y                        | Y                             | N                                                 |                                | N                                                 |                                | N                                                 |
| CC2287      | TonB-dependent maltose outer membrane transporter malA                                                  | malA | Y                        | Y                             | N                                                 |                                | N                                                 |                                | N                                                 |

| Gene Number | Annotation                                                          | Gene | Entry Vector Constructed | Entry Vector Sequence Correct | Localized and Sequence-verified C-terminal Fusion | Localization w/ C-terminal Tag | Localized and Sequence-verified N-terminal Fusion | Localization w/ N-terminal Tag | Protein Localized as Both N- or C-terminal Fusion |
|-------------|---------------------------------------------------------------------|------|--------------------------|-------------------------------|---------------------------------------------------|--------------------------------|---------------------------------------------------|--------------------------------|---------------------------------------------------|
| CC2288      | Tryptophan halogenase                                               |      | Y                        | Y                             | N                                                 |                                | N                                                 |                                | N                                                 |
| CC2289      | hypothetical protein                                                |      | Y                        | Y                             | N                                                 |                                | N                                                 |                                | N                                                 |
| CC2290      | Transposase                                                         |      | Y                        | N                             | N                                                 |                                | N                                                 |                                | N                                                 |
| CC2291      | Transposase                                                         |      | Y                        | N                             | N                                                 |                                | N                                                 |                                | N                                                 |
| CC2292      | hypothetical protein                                                |      | Y                        | Y                             | N                                                 |                                | N                                                 |                                | N                                                 |
| CC2293      | hypothetical protein                                                |      | Y                        | Y                             | N                                                 |                                | N                                                 |                                | N                                                 |
| CC2294      | Hypothetical protein                                                |      | Y                        | Y                             | Y                                                 | Patchy/Spotty                  | N                                                 |                                | N                                                 |
| CC2295      | Aspartate 1-decarboxylase                                           |      | Y                        | Y                             | N                                                 |                                | N                                                 |                                | N                                                 |
| CC2296      | hypothetical protein                                                |      | N                        | N                             | N                                                 |                                | N                                                 |                                | N                                                 |
| CC2297      | membrane peptidase, M23 family                                      |      | Y                        | N                             | N                                                 |                                | N                                                 |                                | N                                                 |
| CC2298      | Lipase                                                              |      | Y                        | Y                             | N                                                 |                                | N                                                 |                                | N                                                 |
| CC2299      | Very-long-chain acyl-CoA synthetase                                 |      | Y                        | Y                             | N                                                 |                                | N                                                 |                                | N                                                 |
| CC2300      | 3-deoxy-7-phosphoheptulonate synthase                               |      | Y                        | Y                             | N                                                 |                                | N                                                 |                                | N                                                 |
| CC2301      | O-antigen ligase related enzyme                                     |      | N                        | N                             | N                                                 |                                | N                                                 |                                | N                                                 |
| CC2302      | Glutathione reductase                                               |      | Y                        | Y                             | N                                                 |                                | N                                                 |                                | N                                                 |
| CC2303      | Ribose 5-phosphate isomerase                                        |      | Y                        | Y                             | N                                                 |                                | N                                                 |                                | N                                                 |
|             | Glucosamine-1-phosphate acetyltransferase / UDP-N-acetylglucosamine |      |                          |                               |                                                   |                                |                                                   |                                |                                                   |
| CC2304      | pyrophosphorylase                                                   |      | Y                        | Y                             | N                                                 |                                | N                                                 |                                | N                                                 |
| CC2305      | Phosphoglycolate phosphatase                                        |      | Y                        | N                             | N                                                 |                                | N                                                 |                                | N                                                 |
| CC2306      | Oxidoreductase                                                      |      | Y                        | Y                             | N                                                 |                                | N                                                 |                                | N                                                 |
| CC2307      | Hypothetical cytosolic protein                                      |      | Y                        | Y                             | N                                                 |                                | N                                                 |                                | N                                                 |
| CC2308      | hypothetical protein                                                |      | Y                        | N                             | N                                                 |                                | N                                                 |                                | N                                                 |
| CC2309      | Glutathione S-transferase                                           |      | Y                        | Y                             | N                                                 |                                | N                                                 |                                | N                                                 |
| CC2310      | hypothetical protein                                                |      | N                        | N                             | N                                                 |                                | N                                                 |                                | N                                                 |
| CC2311      | Hypothetical membrane associated protein                            |      | Y                        | Y                             | Y                                                 | Middle OR Pole                 | N                                                 |                                | N                                                 |
| CC2312      | Transcriptional regulator, DeoR family                              |      | Y                        | N                             | N                                                 |                                | N                                                 |                                | N                                                 |
| CC2313      | Endo-1,4-beta-xylanase                                              |      | Y                        | Y                             | N                                                 |                                | N                                                 |                                | N                                                 |
| CC2314      | 23S rRNA methyltransferase                                          |      | Y                        | N                             | N                                                 |                                | N                                                 |                                | N                                                 |
| CC2315      | Transporter, MFS superfamily                                        |      | Y                        | Y                             | N                                                 |                                | N                                                 |                                | N                                                 |
| CC2316      | Transcriptional regulator                                           |      | Y                        | Y                             | N                                                 |                                | N                                                 |                                | N                                                 |
| CC2317      | Methyl-accepting chemotaxis protein                                 |      | Y                        | Y                             | Y                                                 | Pole                           | N                                                 |                                | N                                                 |
| CC2318      | ABC transporter permease protein                                    |      | Y                        | Y                             | N                                                 |                                | N                                                 |                                | N                                                 |
| CC2319      | ABC transporter ATP-binding protein                                 |      | Y                        | Y                             | N                                                 |                                | N                                                 |                                | N                                                 |
|             | ABC membrane transporter, periplasmic component                     |      |                          |                               |                                                   |                                |                                                   |                                |                                                   |
| CC2320      | membrane lipoprotein                                                |      | Y                        | Y                             | N                                                 |                                | N                                                 |                                | N                                                 |
| CC2321      | membrane lipoprotein                                                |      | N                        | N                             | N                                                 |                                | N                                                 |                                | N                                                 |
| CC2322      | Hypothetical protein                                                |      | Y                        | Y                             | N                                                 |                                | N                                                 |                                | N                                                 |
| CC2323      | Conserved hypothetical protein                                      |      | Y                        | Y                             | N                                                 |                                | Y                                                 | Pole                           | N                                                 |
|             | hybrid sensor histidine kinase/receiver protein                     |      |                          |                               |                                                   |                                |                                                   |                                |                                                   |
| CC2324      | protein                                                             |      | Y                        | Y                             | N                                                 |                                | N                                                 |                                | N                                                 |
| CC2325      | Alpha-methylacyl-CoA racemase                                       |      | N                        | N                             | N                                                 |                                | N                                                 |                                | N                                                 |
| CC2326      | Putative lytic transglycosylase pleA                                | pleA | Y                        | Y                             | N                                                 |                                | N                                                 |                                | N                                                 |
| CC2327      | TonB protein                                                        |      | Y                        | N                             | N                                                 |                                | N                                                 |                                | N                                                 |
| CC2328      | Acyl-CoA dehydrogenase                                              |      | Y                        | Y                             | N                                                 |                                | N                                                 |                                | N                                                 |
| CC2329      | DadA-related amino acid oxidase                                     |      | Y                        | N                             | N                                                 |                                | N                                                 |                                | N                                                 |
| CC2330      | HTH transcriptional regulator                                       |      | Y                        | Y                             | N                                                 |                                | Y                                                 | Patchy/Spotty                  | N                                                 |
| CC2331      | DNA-binding protein HU                                              |      | N                        | N                             | N                                                 |                                | N                                                 |                                | N                                                 |
|             | Biotin synthase related domain containing protein                   |      |                          |                               |                                                   |                                |                                                   |                                |                                                   |
| CC2332      | protein                                                             |      | Y                        | Y                             | N                                                 |                                | N                                                 |                                | N                                                 |
| CC2333      | Uracil DNA glycosylase superfamily protein                          |      | Y                        | Y                             | N                                                 |                                | N                                                 |                                | N                                                 |
| CC2334      | tRNA-His-GTG                                                        |      | N                        | N                             | N                                                 |                                | N                                                 |                                | N                                                 |
| CC2335      | TonB accessory protein exbD                                         | exbD | Y                        | Y                             | N                                                 |                                | N                                                 |                                | N                                                 |

| Gene Number | Annotation                                                                                  | Gene<br>exbB | Entry Vector<br>Constructed | Entry Vector<br>Sequence<br>Correct | Localized and<br>Sequence-<br>verified C-<br>terminal Fusion | Localization w/ C-<br>terminal Tag | Localized and<br>Sequence-<br>verified N-<br>terminal Fusion | Localization w/ N-<br>terminal Tag | Protein<br>Localized as<br>Both N- or C-<br>terminal Fusion |
|-------------|---------------------------------------------------------------------------------------------|--------------|-----------------------------|-------------------------------------|--------------------------------------------------------------|------------------------------------|--------------------------------------------------------------|------------------------------------|-------------------------------------------------------------|
| CC2336      | TonB accessory protein exbB                                                                 |              | Y                           | Y                                   | N                                                            |                                    | N                                                            |                                    | N                                                           |
| CC2337      | Hypothetical secreted protein                                                               |              | Y                           | Y                                   | N                                                            |                                    | N                                                            |                                    | N                                                           |
| CC2338      | Transcriptional regulator, TetR family                                                      |              | Y                           | Y                                   | N                                                            |                                    | N                                                            |                                    | N                                                           |
| CC2339      |                                                                                             |              | Y                           | Y                                   | N                                                            |                                    | N                                                            |                                    | N                                                           |
| CC2340      | non-essential pilus assembly protein                                                        |              | Y                           | Y                                   | N                                                            |                                    | N                                                            |                                    | N                                                           |
| CC2341      | ribonuclease, CafA family                                                                   |              | Y                           | Y                                   | N                                                            |                                    | N                                                            |                                    | N                                                           |
| CC2342      | Septum formation protein Maf<br>Bacterial Protein Translation Initiation Factor<br>1 (IF-1) |              | N                           | N                                   | N                                                            |                                    | N                                                            |                                    | N                                                           |
| CC2343      |                                                                                             |              | Y                           | Y                                   | N                                                            |                                    | N                                                            |                                    | N                                                           |
| CC2344      | Arsenate reductase                                                                          |              | Y                           | Y                                   | N                                                            |                                    | N                                                            |                                    | N                                                           |
| CC2345      | Conserved hypothetical cytosolic protein                                                    |              | Y                           | Y                                   | N                                                            |                                    | N                                                            |                                    | N                                                           |
| CC2346      | Histidinol dehydrogenase<br>Cytosine/uracil/thiamine/allantoin permease<br>family protein   |              | Y                           | Y                                   | N                                                            |                                    | N                                                            |                                    | N                                                           |
| CC2347      |                                                                                             |              | N                           | N                                   | N                                                            |                                    | N                                                            |                                    | N                                                           |
| CC2348      | hypothetical protein                                                                        |              | Y                           | Y                                   | N                                                            |                                    | N                                                            |                                    | N                                                           |
| CC2349      | Hypothetical cytosolic protein<br>UDP-N-acetylglucosamine 1-<br>carboxyvinyltransferase     |              | Y                           | Y                                   | N                                                            |                                    | N                                                            |                                    | N                                                           |
| CC2350      |                                                                                             |              | Y                           | Y                                   | N                                                            |                                    | N                                                            |                                    | N                                                           |
| CC2351      | hypothetical protein                                                                        |              | Y                           | Y                                   | N                                                            |                                    | N                                                            |                                    | N                                                           |
| CC2352      | Transcriptional regulators, LysR family                                                     |              | Y                           | Y                                   | N                                                            |                                    | Y                                                            | Patchy/Spotty                      | N                                                           |
| CC2353      | Quinone oxidoreductase                                                                      |              | Y                           | Y                                   | N                                                            |                                    | N                                                            |                                    | N                                                           |
| CC2354      | Transporter, MFS superfamily                                                                |              | Y                           | Y                                   | N                                                            |                                    | N                                                            |                                    | N                                                           |
| CC2355      | Transcriptional regulator                                                                   |              | N                           | N                                   | N                                                            |                                    | N                                                            |                                    | N                                                           |
| CC2356      | HTH DNA-binding protein                                                                     |              | Y                           | Y                                   | N                                                            |                                    | N                                                            |                                    | N                                                           |
| CC2357      | Beta-xylosidase                                                                             |              | Y                           | Y                                   | N                                                            |                                    | N                                                            |                                    | N                                                           |
| CC2358      | Carboxymethylenebutenolidase<br>N(4)-(beta-N-acetylglucosaminy)-L-<br>asparaginase          |              | Y                           | Y                                   | N                                                            |                                    | N                                                            |                                    | N                                                           |
| CC2359      |                                                                                             |              | Y                           | Y                                   | N                                                            |                                    | N                                                            |                                    | N                                                           |
| CC2360      | Copper homeostasis protein cutC                                                             |              | Y                           | Y                                   | N                                                            |                                    | N                                                            |                                    | N                                                           |
| CC2361      | Glutathionylspermidine synthase family                                                      |              | Y                           | Y                                   | N                                                            |                                    | N                                                            |                                    | N                                                           |
| CC2362      | putative alpha helical protein                                                              |              | Y                           | Y                                   | Y                                                            | Variable Focus<br>Middle OR Pole   | N                                                            |                                    | N                                                           |
| CC2363      | Hypothetical protein                                                                        |              | Y                           | Y                                   | Y                                                            |                                    | N                                                            |                                    | N                                                           |
| CC2364      | Conserved hypothetical protein                                                              |              | Y                           | Y                                   | N                                                            |                                    | N                                                            |                                    | N                                                           |
| CC2365      | surface protein                                                                             |              | Y                           | Y                                   | N                                                            |                                    | N                                                            |                                    | N                                                           |
| CC2366      | surface protein                                                                             |              | Y                           | Y                                   | N                                                            |                                    | N                                                            |                                    | N                                                           |
| CC2367      | hypothetical protein                                                                        |              | Y                           | Y                                   | N                                                            |                                    | N                                                            |                                    | N                                                           |
| CC2368      | Protein tyrosine phosphatase                                                                |              | Y                           | N                                   | N                                                            |                                    | N                                                            |                                    | N                                                           |
| CC2369      | N-methylhydantoinase (ATP-hydrolyzing)                                                      |              | N                           | N                                   | N                                                            |                                    | N                                                            |                                    | N                                                           |
| CC2370      | Conserved integral membrane protein                                                         |              | Y                           | Y                                   | N                                                            |                                    | N                                                            |                                    | N                                                           |
| CC2371      | Ribonuclease III<br>Nitropropane dioxygenase / Trans-enoyl-CoA<br>reductase family          |              | N                           | N                                   | N                                                            |                                    | N                                                            |                                    | N                                                           |
| CC2372      |                                                                                             |              | Y                           | Y                                   | N                                                            |                                    | N                                                            |                                    | N                                                           |
| CC2373      | Methylmalonyl-CoA mutase beta subunit                                                       |              | Y                           | Y                                   | N                                                            |                                    | N                                                            |                                    | N                                                           |
| CC2374      | Methylmalonyl-CoA mutase alpha subunit                                                      |              | Y                           | Y                                   | N                                                            |                                    | N                                                            |                                    | N                                                           |
| CC2375      | conserved hypothetical protein                                                              |              | Y                           | Y                                   | N                                                            |                                    | N                                                            |                                    | N                                                           |
| CC2376      | hypothetical protein                                                                        |              | Y                           | Y                                   | N                                                            |                                    | N                                                            |                                    | N                                                           |
| CC2377      | Hypothetical protein                                                                        |              | Y                           | N                                   | N                                                            |                                    | N                                                            |                                    | N                                                           |
| CC2378      | UDP-N-acetylglucosamine 4-epimerase                                                         |              | Y                           | Y                                   | N                                                            |                                    | N                                                            |                                    | N                                                           |
| CC2379      | UDP-glucose 6-dehydrogenase                                                                 |              | Y                           | Y                                   | N                                                            |                                    | N                                                            |                                    | N                                                           |
| CC2380      |                                                                                             |              | Y                           | Y                                   | N                                                            |                                    | N                                                            |                                    | N                                                           |
| CC2381      |                                                                                             |              | Y                           | Y                                   | N                                                            |                                    | N                                                            |                                    | N                                                           |
| CC2382      | UDP-glucose 6-dehydrogenase                                                                 |              | Y                           | Y                                   | N                                                            |                                    | N                                                            |                                    | N                                                           |
| CC2383      | UDP-glucose 4-epimerase                                                                     |              | Y                           | Y                                   | N                                                            |                                    | N                                                            |                                    | N                                                           |

| Gene Number | Annotation                                                                      | Gene | Entry Vector Constructed | Entry Vector Sequence Correct | Localized and Sequence-verified C-terminal Fusion | Localization w/ C-terminal Tag | Localized and Sequence-verified N-terminal Fusion | Localization w/ N-terminal Tag | Protein Localized as Both N- or C-terminal Fusion |
|-------------|---------------------------------------------------------------------------------|------|--------------------------|-------------------------------|---------------------------------------------------|--------------------------------|---------------------------------------------------|--------------------------------|---------------------------------------------------|
| CC2384      | polyisoprenylphosphate hexose-1-phosphotransferase pssZ                         | pssZ | Y                        | Y                             | N                                                 |                                | N                                                 |                                | N                                                 |
| CC2385      | hypothetical protein                                                            |      | Y                        | N                             | N                                                 |                                | N                                                 |                                | N                                                 |
| CC2386      | protein hipA                                                                    |      | Y                        | Y                             | N                                                 |                                | N                                                 |                                | N                                                 |
| CC2387      | DNA integration/recombination/inversion protein                                 |      | Y                        | Y                             | N                                                 |                                | N                                                 |                                | N                                                 |
| CC2388      | Cobalt-zinc-cadmium resistance protein czcC                                     |      | Y                        | Y                             | N                                                 |                                | N                                                 |                                | N                                                 |
| CC2389      | Cobalt-zinc-cadmium resistance protein czcB                                     |      | Y                        | Y                             | N                                                 |                                | N                                                 |                                | N                                                 |
| CC2390      | Cobalt-zinc-cadmium resistance protein czcA                                     |      | Y                        | N                             | N                                                 |                                | N                                                 |                                | N                                                 |
| CC2391      | Transcriptional regulator, MarR family                                          |      | Y                        | Y                             | N                                                 |                                | N                                                 |                                | N                                                 |
| CC2392      | Transcriptional regulator vanR                                                  |      | Y                        | Y                             | N                                                 |                                | N                                                 |                                | N                                                 |
| CC2393      | Vanillate demethylase oxygenase subunit A                                       |      | N                        | N                             | N                                                 |                                | N                                                 |                                | N                                                 |
| CC2394      | Vanillate demethylase oxidoreductase subunit vanB                               |      | N                        | N                             | N                                                 |                                | N                                                 |                                | N                                                 |
| CC2395      | Dihydrolipoamide acetyltransferase component of acetoin cleaving system         |      | Y                        | Y                             | N                                                 |                                | N                                                 |                                | N                                                 |
| CC2396      | Aryl-alcohol dehydrogenase                                                      |      | Y                        | N                             | N                                                 |                                | N                                                 |                                | N                                                 |
| CC2397      | Benzaldehyde dehydrogenase [NAD+]                                               |      | Y                        | Y                             | N                                                 |                                | N                                                 |                                | N                                                 |
| CC2398      | TonB-dependent receptor                                                         |      | Y                        | Y                             | N                                                 |                                | N                                                 |                                | N                                                 |
| CC2399      | Transcriptional regulator, AraC family                                          |      | N                        | N                             | N                                                 |                                | N                                                 |                                | N                                                 |
| CC2400      | 4-coumarate--CoA ligase                                                         |      | Y                        | Y                             | N                                                 |                                | N                                                 |                                | N                                                 |
| CC2401      | Trans-feruloyl-CoA hydratase                                                    |      | Y                        | Y                             | N                                                 |                                | N                                                 |                                | N                                                 |
| CC2402      | Vanillin dehydrogenase                                                          |      | Y                        | Y                             | N                                                 |                                | N                                                 |                                | N                                                 |
| CC2403      | Transcriptional regulator, AraC family                                          |      | Y                        | Y                             | N                                                 |                                | N                                                 |                                | N                                                 |
| CC2404      | 4-hydroxybenzoate 3-monooxygenase acetate/3-ketoacid CoA transferase, subunit A |      | Y                        | Y                             | N                                                 |                                | N                                                 |                                | N                                                 |
| CC2405      | acetate/3-ketoacid CoA transferase, subunit B                                   |      | Y                        | N                             | N                                                 |                                | N                                                 |                                | N                                                 |
| CC2406      | 3-ketoacyl-CoA thiolase                                                         |      | Y                        | Y                             | N                                                 |                                | N                                                 |                                | N                                                 |
| CC2407      | Protocatechuate 3,4-dioxygenase beta chain                                      |      | N                        | N                             | N                                                 |                                | N                                                 |                                | N                                                 |
| CC2408      | Protocatechuate 3,4-dioxygenase alpha chain                                     |      | Y                        | Y                             | N                                                 |                                | N                                                 |                                | N                                                 |
| CC2409      | 3-carboxy-cis,cis-muconate cycloisomerase                                       |      | Y                        | Y                             | N                                                 |                                | N                                                 |                                | N                                                 |
| CC2410      | 3-oxoadipate enol-lactonase / 4-carboxymuconolactone decarboxylase              |      | N                        | N                             | N                                                 |                                | N                                                 |                                | N                                                 |
| CC2411      | 4-hydroxybenzoate transporter                                                   |      | Y                        | Y                             | N                                                 |                                | N                                                 |                                | N                                                 |
| CC2412      |                                                                                 |      | Y                        | N                             | N                                                 |                                | N                                                 |                                | N                                                 |
| CC2413      |                                                                                 |      | N                        | N                             | N                                                 |                                | N                                                 |                                | N                                                 |
| CC2414      | Hypothetical protein                                                            |      | Y                        | Y                             | N                                                 |                                | N                                                 |                                | N                                                 |
| CC2415      | Hypothetical protein                                                            |      | Y                        | Y                             | N                                                 |                                | N                                                 |                                | N                                                 |
| CC2416      | Type IV secretory pathway, VirB2 protein                                        |      | Y                        | N                             | N                                                 |                                | N                                                 |                                | N                                                 |
| CC2417      |                                                                                 |      | Y                        | Y                             | N                                                 |                                | N                                                 |                                | N                                                 |
| CC2418      | Type IV secretory pathway, VirB3 protein                                        |      | N                        | N                             | N                                                 |                                | N                                                 |                                | N                                                 |
| CC2419      | Type IV secretory pathway, VirB4 ATPase                                         |      | Y                        | Y                             | N                                                 |                                | N                                                 |                                | N                                                 |
| CC2420      | Type IV secretory pathway, VirB6 channel protein                                |      | N                        | N                             | N                                                 |                                | N                                                 |                                | N                                                 |
| CC2421      | Type IV secretory pathway, VirB9 channel protein                                |      | N                        | N                             | N                                                 |                                | N                                                 |                                | N                                                 |
| CC2422      | Type IV secretory pathway, VirB10 channel protein                               |      | Y                        | Y                             | N                                                 |                                | N                                                 |                                | N                                                 |
| CC2423      | Type IV secretory pathway, VirB11 ATPase                                        |      | N                        | N                             | N                                                 |                                | N                                                 |                                | N                                                 |
| CC2424      | Transposase                                                                     |      | Y                        | Y                             | N                                                 |                                | N                                                 |                                | N                                                 |

| Gene Number | Annotation                                                 | Gene | Entry Vector Constructed | Entry Vector Sequence Correct | Localized and Sequence-verified C-terminal Fusion | Localization w/ C-terminal Tag | Localized and Sequence-verified N-terminal Fusion | Localization w/ N-terminal Tag | Protein Localized as Both N- or C-terminal Fusion |
|-------------|------------------------------------------------------------|------|--------------------------|-------------------------------|---------------------------------------------------|--------------------------------|---------------------------------------------------|--------------------------------|---------------------------------------------------|
| CC2425      | polyisoprenylphosphate hexose-1-phosphotransferase hfsE    | hfsE | Y                        | Y                             | N                                                 |                                | N                                                 |                                | N                                                 |
| CC2426      | oligosaccharide translocase/flippase hfsF                  | hfsF | Y                        | Y                             | N                                                 |                                | N                                                 |                                | N                                                 |
| CC2427      | glycosyltransferase hfsG                                   | hfsG | N                        | N                             | N                                                 |                                | N                                                 |                                | N                                                 |
| CC2428      | oligosaccharide deacetylase hfsH                           | hfsH | Y                        | Y                             | N                                                 |                                | N                                                 |                                | N                                                 |
| CC2429      | polysaccharide polymerase hfsC                             | hfsC | Y                        | Y                             | N                                                 |                                | N                                                 |                                | N                                                 |
| CC2430      | Polysaccharide autokinase-related protein hfsB             | hfsB | Y                        | Y                             | N                                                 |                                | N                                                 |                                | N                                                 |
| CC2431      | Frameshifted variant of holdfast synthesis gene hfsA       | hfsA | Y                        | Y                             | N                                                 |                                | N                                                 |                                | N                                                 |
| CC2432      | polysaccharide secretin protein hfsD                       | hfsD | Y                        | Y                             | N                                                 |                                | N                                                 |                                | N                                                 |
| CC2433      | Hypothetical cytosolic protein                             |      | N                        | N                             | N                                                 |                                | N                                                 |                                | N                                                 |
| CC2434      | Glutathione S-transferase                                  |      | Y                        | Y                             | N                                                 |                                | N                                                 |                                | N                                                 |
| CC2435      | Conserved hypothetical protein                             |      | Y                        | Y                             | N                                                 |                                | N                                                 |                                | N                                                 |
| CC2436      | Aspartyl/glutamyl-tRNA(Asn/Gln) amidotransferase subunit B |      | Y                        | Y                             | N                                                 |                                | N                                                 |                                | N                                                 |
| CC2437      | Aspartyl/glutamyl-tRNA(Asn/Gln) amidotransferase subunit A |      | Y                        | Y                             | N                                                 |                                | N                                                 |                                | N                                                 |
| CC2438      | Aspartyl/glutamyl-tRNA(Asn/Gln) amidotransferase subunit C |      | Y                        | Y                             | N                                                 |                                | N                                                 |                                | N                                                 |
| CC2439      | Endonuclease involved in recombination                     |      | Y                        | Y                             | N                                                 |                                | N                                                 |                                | N                                                 |
| CC2440      | hypothetical protein                                       |      | Y                        | Y                             | N                                                 |                                | N                                                 |                                | N                                                 |
| CC2441      | hypothetical protein                                       |      | Y                        | N                             | N                                                 |                                | N                                                 |                                | N                                                 |
| CC2442      | hypothetical protein                                       |      | Y                        | Y                             | N                                                 |                                | N                                                 |                                | N                                                 |
| CC2443      | Aspartate carbamoyltransferase                             |      | Y                        | Y                             | N                                                 |                                | N                                                 |                                | N                                                 |
| CC2444      | Dihydroorotase                                             |      | N                        | N                             | N                                                 |                                | N                                                 |                                | N                                                 |
| CC2445      | hypothetical protein                                       |      | Y                        | Y                             | N                                                 |                                | N                                                 |                                | N                                                 |
| CC2446      | Hypothetical membrane spanning protein                     |      | N                        | N                             | N                                                 |                                | N                                                 |                                | N                                                 |
| CC2447      | DNA processing protein                                     |      | Y                        | N                             | N                                                 |                                | N                                                 |                                | N                                                 |
| CC2448      | SAM-dependent methyltransferase                            |      | Y                        | Y                             | N                                                 |                                | N                                                 |                                | N                                                 |
| CC2449      | proline-rich hypothetical protein                          |      | N                        | N                             | N                                                 |                                | N                                                 |                                | N                                                 |
| CC2450      | hypothetical protein                                       |      | Y                        | Y                             | N                                                 |                                | N                                                 |                                | N                                                 |
| CC2451      | hypothetical protein                                       |      | N                        | N                             | N                                                 |                                | N                                                 |                                | N                                                 |
| CC2452      | DNA topoisomerase I                                        |      | Y                        | Y                             | N                                                 |                                | N                                                 |                                | N                                                 |
| CC2453      | Ribonuclease R                                             |      | Y                        | Y                             | N                                                 |                                | N                                                 |                                | N                                                 |
| CC2454      | Endoglucanase E                                            |      | Y                        | Y                             | N                                                 |                                | N                                                 |                                | N                                                 |
| CC2455      | Aspartate aminotransferase                                 |      | Y                        | Y                             | N                                                 |                                | N                                                 |                                | N                                                 |
| CC2456      | N-acyl-L-amino acid amidohydrolase                         |      | Y                        | Y                             | N                                                 |                                | N                                                 |                                | N                                                 |
| CC2457      | Phosphohydrolase (MutT/nudix family protein)               |      | Y                        | Y                             | N                                                 |                                | N                                                 |                                | N                                                 |
| CC2458      | hypothetical protein                                       |      | Y                        | Y                             | N                                                 |                                | N                                                 |                                | N                                                 |
| CC2459      | LSU ribosomal protein L33P                                 |      | Y                        | Y                             | N                                                 |                                | N                                                 |                                | N                                                 |
| CC2460      | hypothetical protein                                       |      | Y                        | Y                             | N                                                 |                                | N                                                 |                                | N                                                 |
| CC2461      | Alkaline phosphatase                                       |      | Y                        | Y                             | N                                                 |                                | N                                                 |                                | N                                                 |
| CC2462      | GGDEF/response regulator protein pleD                      | pleD | Y                        | Y                             | N                                                 |                                | N                                                 |                                | N                                                 |
| CC2463      | Response regulator receiver protein divK                   | divK | Y                        | Y                             | Y                                                 | Bipolar and Unipolar           | N                                                 |                                | N                                                 |
| CC2464      | Conserved hypothetical protein                             |      | Y                        | Y                             | N                                                 |                                | N                                                 |                                | N                                                 |
| CC2465      | Glucokinase                                                |      | N                        | N                             | N                                                 |                                | N                                                 |                                | N                                                 |
| CC2466      | DNA polymerase IV-kappa dinB                               |      | Y                        | Y                             | N                                                 |                                | N                                                 |                                | N                                                 |
| CC2467      | ATP-dependent Clp protease adaptor protein ClpS            | clpS | Y                        | Y                             | N                                                 |                                | N                                                 |                                | N                                                 |
| CC2468      | ATP-dependent clp protease ATP-binding subunit clpA        | clpA | Y                        | Y                             | N                                                 |                                | N                                                 |                                | N                                                 |

| Gene Number | Annotation                                               | Gene | Entry Vector Constructed | Entry Vector Sequence Correct | Localized and Sequence-verified C-terminal Fusion | Localization w/ C-terminal Tag | Localized and Sequence-verified N-terminal Fusion | Localization w/ N-terminal Tag | Protein Localized as Both N- or C-terminal Fusion |
|-------------|----------------------------------------------------------|------|--------------------------|-------------------------------|---------------------------------------------------|--------------------------------|---------------------------------------------------|--------------------------------|---------------------------------------------------|
| CC2469      | Conserved hypothetical protein                           |      | Y                        | Y                             | Y                                                 | Patchy/Spotty                  | N                                                 |                                | N                                                 |
| CC2470      | Adenosine 5'-monophosphoramidase                         |      | Y                        | Y                             | N                                                 |                                | N                                                 |                                | N                                                 |
| CC2471      | hypothetical protein                                     |      | Y                        | Y                             | N                                                 |                                | N                                                 |                                | N                                                 |
| CC2472      | Acyl-CoA thioesterase II                                 |      | Y                        | Y                             | N                                                 |                                | N                                                 |                                | N                                                 |
| CC2473      | Enantioselective peptide amidase                         |      | Y                        | N                             | N                                                 |                                | N                                                 |                                | N                                                 |
| CC2474      | NTF2 enzyme family protein                               |      | Y                        | Y                             | N                                                 |                                | N                                                 |                                | N                                                 |
| CC2475      | glycine-rich hypothetical protein                        |      | Y                        | N                             | N                                                 |                                | N                                                 |                                | N                                                 |
| CC2476      | hypothetical protein                                     |      | Y                        | Y                             | N                                                 |                                | N                                                 |                                | N                                                 |
| CC2477      | Sel1 repeat domain protein                               |      | Y                        | Y                             | N                                                 |                                | N                                                 |                                | N                                                 |
| CC2478      | Acyl-CoA dehydrogenase                                   |      | Y                        | Y                             | N                                                 |                                | N                                                 |                                | N                                                 |
| CC2479      | Acyl-CoA dehydrogenase, short-chain specific             |      | Y                        | Y                             | N                                                 |                                | N                                                 |                                | N                                                 |
| CC2480      | Conserved hypothetical protein                           |      | Y                        | Y                             | N                                                 |                                | Y                                                 | Patchy/Spotty                  | N                                                 |
| CC2481      | Membrane alanine aminopeptidase                          |      | N                        | N                             | N                                                 |                                | N                                                 |                                | N                                                 |
| CC2482      | Sensory transduction histidine kinase pleC               | pleC | Y                        | Y                             | Y                                                 | Pole                           | N                                                 |                                | N                                                 |
| CC2483      | LAO/AO transport system kinase                           |      | N                        | N                             | N                                                 |                                | N                                                 |                                | N                                                 |
| CC2484      | Glutathione S-transferase                                |      | Y                        | N                             | N                                                 |                                | N                                                 |                                | N                                                 |
| CC2485      | Transporter                                              |      | Y                        | Y                             | N                                                 |                                | N                                                 |                                | N                                                 |
| CC2486      | Transporter                                              |      | Y                        | Y                             | N                                                 |                                | N                                                 |                                | N                                                 |
| CC2487      | Adenylosuccinate lyase                                   |      | Y                        | Y                             | N                                                 |                                | N                                                 |                                | N                                                 |
| CC2488      | proline hydroxylase                                      |      | N                        | N                             | N                                                 |                                | N                                                 |                                | N                                                 |
| CC2489      | Hypothetical cytosolic protein                           |      | Y                        | Y                             | N                                                 |                                | N                                                 |                                | N                                                 |
| CC2490      | Hypothetical cytosolic protein                           |      | Y                        | Y                             | N                                                 |                                | N                                                 |                                | N                                                 |
| CC2491      | Phosphoribosylamidoimidazole-succinocarboxamide synthase |      | Y                        | Y                             | N                                                 |                                | N                                                 |                                | N                                                 |
| CC2492      | Phosphoribosylformylglycinamide synthase, purS component |      | Y                        | N                             | N                                                 |                                | N                                                 |                                | N                                                 |
| CC2493      | TetR family transcriptional regulator                    |      | Y                        | N                             | N                                                 |                                | N                                                 |                                | N                                                 |
| CC2494      | Cytochrome P450-terp                                     |      | Y                        | Y                             | N                                                 |                                | N                                                 |                                | N                                                 |
| CC2495      | Rubredoxin                                               |      | Y                        | Y                             | N                                                 |                                | N                                                 |                                | N                                                 |
| CC2496      | hypothetical protein                                     |      | Y                        | Y                             | N                                                 |                                | N                                                 |                                | N                                                 |
| CC2497      | Phosphoribosylformylglycinamide synthase                 |      | Y                        | Y                             | N                                                 |                                | N                                                 |                                | N                                                 |
| CC2498      | hypothetical protein                                     |      | Y                        | N                             | N                                                 |                                | N                                                 |                                | N                                                 |
| CC2499      | hypothetical protein                                     |      | Y                        | Y                             | N                                                 |                                | N                                                 |                                | N                                                 |
| CC2500      | Phosphoribosylformylglycinamide synthase                 |      | Y                        | N                             | N                                                 |                                | N                                                 |                                | N                                                 |
| CC2501      | PAS-family sensor histidine kinase                       |      | Y                        | Y                             | N                                                 |                                | N                                                 |                                | N                                                 |
| CC2502      | Aminopeptidase                                           |      | Y                        | Y                             | N                                                 |                                | N                                                 |                                | N                                                 |
| CC2503      | bolA-related transcriptional regulator                   |      | Y                        | N                             | N                                                 |                                | N                                                 |                                | N                                                 |
| CC2504      | Conserved hypothetical protein                           |      | Y                        | Y                             | N                                                 |                                | N                                                 |                                | N                                                 |
| CC2505      | Glutaredoxin                                             |      | Y                        | Y                             | N                                                 |                                | N                                                 |                                | N                                                 |
| CC2506      | Thioesterase                                             |      | Y                        | Y                             | N                                                 |                                | N                                                 |                                | N                                                 |
| CC2507      | hypothetical protein                                     |      | Y                        | N                             | N                                                 |                                | N                                                 |                                | N                                                 |
| CC2508      |                                                          |      | Y                        | Y                             | N                                                 |                                | N                                                 |                                | N                                                 |
| CC2509      | Endopeptidase htpX                                       |      | N                        | N                             | N                                                 |                                | N                                                 |                                | N                                                 |
| CC2510      | Hypothetical protein                                     |      | Y                        | N                             | N                                                 |                                | N                                                 |                                | N                                                 |
| CC2511      | Conserved hypothetical protein                           |      | Y                        | Y                             | N                                                 |                                | N                                                 |                                | N                                                 |
| CC2512      | toxin protein relE-2                                     |      | Y                        | Y                             | N                                                 |                                | N                                                 |                                | N                                                 |
| CC2513      | antitoxin protein relB-2                                 |      | Y                        | Y                             | N                                                 |                                | N                                                 |                                | N                                                 |
| CC2514      |                                                          |      | Y                        | Y                             | N                                                 |                                | N                                                 |                                | N                                                 |
| CC2515      | S-formylglutathione hydrolase                            |      | Y                        | Y                             | N                                                 |                                | N                                                 |                                | N                                                 |
| CC2516      | Glutathione-dependent formaldehyde dehydrogenase         |      | Y                        | Y                             | N                                                 |                                | N                                                 |                                | N                                                 |
| CC2517      | Transcriptional regulators, LysR family                  |      | Y                        | Y                             | N                                                 |                                | N                                                 |                                | N                                                 |

| Gene Number | Annotation                                                                                                           | Gene | Entry Vector Constructed | Entry Vector Sequence Correct | Localized and Sequence-verified C-terminal Fusion | Localization w/ C-terminal Tag | Localized and Sequence-verified N-terminal Fusion | Localization w/ N-terminal Tag | Protein Localized as Both N- or C-terminal Fusion |
|-------------|----------------------------------------------------------------------------------------------------------------------|------|--------------------------|-------------------------------|---------------------------------------------------|--------------------------------|---------------------------------------------------|--------------------------------|---------------------------------------------------|
| CC2518      | Phosphatidylserine decarboxylase                                                                                     |      | Y                        | Y                             | N                                                 |                                | N                                                 |                                | N                                                 |
| CC2519      | host cell attachment protein, COG5622                                                                                |      | Y                        | Y                             | N                                                 |                                | N                                                 |                                | N                                                 |
| CC2520      | RRNA methylase, SpoU family hybrid sensor histidine kinase/receiver domain protein                                   |      | Y                        | Y                             | N                                                 |                                | N                                                 |                                | N                                                 |
| CC2521      |                                                                                                                      |      | N                        | N                             | N                                                 |                                | N                                                 |                                | N                                                 |
| CC2522      | Isocitrate dehydrogenase [NADP]                                                                                      |      | Y                        | Y                             | N                                                 |                                | N                                                 |                                | N                                                 |
| CC2523      | Conserved hypothetical protein                                                                                       |      | Y                        | N                             | N                                                 |                                | N                                                 |                                | N                                                 |
| CC2524      | Putative malonate transporter                                                                                        |      | N                        | N                             | N                                                 |                                | N                                                 |                                | N                                                 |
| CC2525      |                                                                                                                      |      | Y                        | Y                             | N                                                 |                                | N                                                 |                                | N                                                 |
| CC2526      | Glyoxalase family protein                                                                                            |      | Y                        | Y                             | N                                                 |                                | N                                                 |                                | N                                                 |
| CC2527      | Transcriptional regulator, AraC family                                                                               |      | Y                        | Y                             | N                                                 |                                | N                                                 |                                | N                                                 |
| CC2528      |                                                                                                                      |      | Y                        | Y                             | N                                                 |                                | N                                                 |                                | N                                                 |
| CC2529      | Alanyl-tRNA synthetase                                                                                               |      | Y                        | Y                             | N                                                 |                                | N                                                 |                                | N                                                 |
| CC2530      | Rieske (2Fe-2S) domain protein                                                                                       |      | Y                        | Y                             | N                                                 |                                | N                                                 |                                | N                                                 |
| CC2531      | Fumarylacetoacetase                                                                                                  |      | Y                        | Y                             | N                                                 |                                | N                                                 |                                | N                                                 |
| CC2532      | Homogentisate 1,2-dioxygenase                                                                                        |      | Y                        | Y                             | N                                                 |                                | N                                                 |                                | N                                                 |
| CC2533      | 4-hydroxyphenylpyruvate dioxygenase                                                                                  |      | Y                        | Y                             | N                                                 |                                | N                                                 |                                | N                                                 |
| CC2534      | Histidinol-phosphate aminotransferase                                                                                |      | N                        | N                             | N                                                 |                                | N                                                 |                                | N                                                 |
| CC2535      | Transcriptional regulator, AsnC family                                                                               |      | Y                        | Y                             | N                                                 |                                | N                                                 |                                | N                                                 |
| CC2536      | stomatin/prohibitin-related protein                                                                                  |      | Y                        | Y                             | N                                                 |                                | Y                                                 | Patchy/Spotty                  | N                                                 |
| CC2537      | Conserved hypothetical protein                                                                                       |      | Y                        | Y                             | N                                                 |                                | N                                                 |                                | N                                                 |
| CC2538      | CAAX amino terminal protease family                                                                                  |      | Y                        | Y                             | N                                                 |                                | N                                                 |                                | N                                                 |
| CC2539      | M61 glycyI aminopeptidase                                                                                            |      | Y                        | Y                             | N                                                 |                                | N                                                 |                                | N                                                 |
| CC2540      | Cell division protein ftsZ                                                                                           | ftsZ | Y                        | Y                             | Y                                                 | MidBand                        | N                                                 |                                | N                                                 |
| CC2541      | Cell division protein ftsA                                                                                           | ftsA | Y                        | N                             | N                                                 |                                | N                                                 |                                | N                                                 |
| CC2542      | Cell division protein ftsQ                                                                                           | ftsQ | Y                        | Y                             | N                                                 |                                | N                                                 |                                | N                                                 |
| CC2543      | D-alanine--D-alanine ligase                                                                                          |      | Y                        | Y                             | N                                                 |                                | N                                                 |                                | N                                                 |
| CC2544      | Aminopeptidase                                                                                                       |      | Y                        | Y                             | Y                                                 | Patchy/Spotty                  | N                                                 |                                | N                                                 |
| CC2545      | UDP-N-acetylenolpyruvoylglucosamine reductase                                                                        |      | Y                        | Y                             | N                                                 |                                | N                                                 |                                | N                                                 |
| CC2546      | UDP-N-acetylmuramate--alanine ligase                                                                                 |      | Y                        | Y                             | Y                                                 | Line                           | N                                                 |                                | N                                                 |
| CC2547      | hypothetical protein                                                                                                 |      | Y                        | Y                             | N                                                 |                                | N                                                 |                                | N                                                 |
| CC2548      | putative ATP-binding protein                                                                                         |      | Y                        | Y                             | N                                                 |                                | N                                                 |                                | N                                                 |
| CC2549      | Putative heme-binding protein                                                                                        |      | Y                        | Y                             | N                                                 |                                | N                                                 |                                | N                                                 |
| CC2550      | Hypothetical exported protein                                                                                        |      | Y                        | N                             | N                                                 |                                | N                                                 |                                | N                                                 |
| CC2551      | UDP-N-acetylglucosamine--N-acetylmuramyl- (pentapeptide) pyrophosphoryl-undecaprenol N-acetylglucosamine transferase |      | Y                        | Y                             | Y                                                 | MidBand                        | Y                                                 | MidBand                        | Y                                                 |
| CC2552      | Cell division protein ftsW                                                                                           |      | Y                        | Y                             | N                                                 |                                | N                                                 |                                | N                                                 |
| CC2553      | hypothetical protein                                                                                                 |      | Y                        | Y                             | N                                                 |                                | N                                                 |                                | N                                                 |
| CC2554      | PAS-family sensor histidine kinase                                                                                   |      | Y                        | Y                             | N                                                 |                                | N                                                 |                                | N                                                 |
| CC2555      | Chloride channel protein                                                                                             |      | Y                        | Y                             | N                                                 |                                | N                                                 |                                | N                                                 |
| CC2556      | UDP-N-acetylmuramoylalanine--D-glutamate ligase                                                                      |      | Y                        | Y                             | N                                                 |                                | N                                                 |                                | N                                                 |
| CC2557      |                                                                                                                      |      | N                        | N                             | N                                                 |                                | N                                                 |                                | N                                                 |
| CC2558      | UDP-N-acetylmuramoyl-tripeptide--D-alanyl-D-alanine ligase                                                           |      | Y                        | Y                             | N                                                 |                                | N                                                 |                                | N                                                 |
| CC2559      | UDP-N-acetylmuramoylalanine-D-glutamate--2,6-diaminopimelate ligase                                                  |      | Y                        | Y                             | N                                                 |                                | N                                                 |                                | N                                                 |
| CC2560      | Division specific D,D-transpeptidase / Cell division protein ftsI                                                    | ftsI | Y                        | Y                             | N                                                 |                                | N                                                 |                                | N                                                 |
| CC2561      | putative cell division protein                                                                                       |      | Y                        | Y                             | N                                                 |                                | N                                                 |                                | N                                                 |
| CC2562      | S-adenosyl-methyltransferase mraW                                                                                    |      | N                        | N                             | N                                                 |                                | N                                                 |                                | N                                                 |

| Gene Number | Annotation                                                      | Gene | Entry Vector Constructed | Entry Vector Sequence Correct | Localized and Sequence-verified C-terminal Fusion | Localization w/ C-terminal Tag | Localized and Sequence-verified N-terminal Fusion | Localization w/ N-terminal Tag | Protein Localized as Both N- or C-terminal Fusion |
|-------------|-----------------------------------------------------------------|------|--------------------------|-------------------------------|---------------------------------------------------|--------------------------------|---------------------------------------------------|--------------------------------|---------------------------------------------------|
| CC2563      | Cell division protein mraZ                                      |      | Y                        | N                             | N                                                 |                                | N                                                 |                                | N                                                 |
| CC2564      | Transcriptional regulator                                       |      | Y                        | N                             | N                                                 |                                | N                                                 |                                | N                                                 |
| CC2565      | alpha/beta hydrolase family protein                             |      | Y                        | Y                             | N                                                 |                                | N                                                 |                                | N                                                 |
| CC2566      | Transcriptional regulator                                       |      | Y                        | Y                             | N                                                 |                                | N                                                 |                                | N                                                 |
| CC2567      | Anhydro-N-acetylmuramyl-tripeptide amidase                      |      | Y                        | Y                             | N                                                 |                                | N                                                 |                                | N                                                 |
| CC2568      | Transporter, drug/metabolite exporter family                    |      | Y                        | Y                             | N                                                 |                                | N                                                 |                                | N                                                 |
| CC2569      | Cyclohexanone monooxygenase                                     |      | Y                        | Y                             | N                                                 |                                | N                                                 |                                | N                                                 |
| CC2570      | Sensory transduction protein kinase                             |      | Y                        | Y                             | N                                                 |                                | N                                                 |                                | N                                                 |
| CC2571      | hypothetical protein                                            |      | Y                        | Y                             | N                                                 |                                | N                                                 |                                | N                                                 |
| CC2572      | NTF2 enzyme family protein                                      |      | Y                        | Y                             | N                                                 |                                | N                                                 |                                | N                                                 |
| CC2573      | Transcriptional regulator, AraC family                          |      | Y                        | Y                             | Y                                                 | Middle OR Pole                 | N                                                 |                                | N                                                 |
| CC2574      |                                                                 |      | Y                        | Y                             | N                                                 |                                | N                                                 |                                | N                                                 |
| CC2575      | 3-hydroxybutyryl-CoA dehydratase                                |      | N                        | N                             | N                                                 |                                | N                                                 |                                | N                                                 |
| CC2576      | two-component receiver domain protein                           |      | Y                        | Y                             | N                                                 |                                | N                                                 |                                | N                                                 |
| CC2577      | Pyridoxamine 5'-phosphate oxidase family protein                |      | Y                        | Y                             | N                                                 |                                | N                                                 |                                | N                                                 |
| CC2578      | Peptidase, M16 family                                           |      | Y                        | Y                             | N                                                 |                                | N                                                 |                                | N                                                 |
| CC2579      | Aminopeptidase                                                  |      | Y                        | Y                             | N                                                 |                                | N                                                 |                                | N                                                 |
| CC2580      | DnaK suppressor protein dksA                                    | dksA | Y                        | Y                             | N                                                 |                                | N                                                 |                                | N                                                 |
| CC2581      | flagellar assembly regulator fliX                               | fliX | Y                        | Y                             | N                                                 |                                | N                                                 |                                | N                                                 |
| CC2582      | Flagellar P-ring protein flgI                                   | flgI | N                        | N                             | N                                                 |                                | N                                                 |                                | N                                                 |
| CC2583      | Chemotactic signal-response protein cheL                        |      | Y                        | Y                             | N                                                 |                                | N                                                 |                                | N                                                 |
| CC2584      | Flagellar basal-body protein flbY                               | flbY | Y                        | Y                             | N                                                 |                                | N                                                 |                                | N                                                 |
| CC2585      | Ribosomal protein L11 methyltransferase                         |      | Y                        | Y                             | Y                                                 | Middle OR Pole                 | N                                                 |                                | N                                                 |
| CC2586      | Hypothetical protein                                            |      | Y                        | Y                             | N                                                 |                                | N                                                 |                                | N                                                 |
| CC2587      | ABC transporter ATP-binding protein                             |      | Y                        | Y                             | N                                                 |                                | N                                                 |                                | N                                                 |
| CC2588      | hypothetical protein                                            |      | Y                        | Y                             | N                                                 |                                | N                                                 |                                | N                                                 |
| CC2589      | hypothetical protein                                            |      | Y                        | Y                             | N                                                 |                                | N                                                 |                                | N                                                 |
| CC2590      | Excinuclease ABC subunit A                                      |      | Y                        | Y                             | Y                                                 | Patchy/Spotty                  | N                                                 |                                | N                                                 |
| CC2591      | Transposase                                                     |      | Y                        | N                             | N                                                 |                                | N                                                 |                                | N                                                 |
| CC2592      | Transposase                                                     |      | Y                        | N                             | N                                                 |                                | N                                                 |                                | N                                                 |
| CC2593      | Conserved hypothetical protein                                  |      | Y                        | Y                             | N                                                 |                                | N                                                 |                                | N                                                 |
| CC2594      | Glutathione S-transferase                                       |      | Y                        | Y                             | N                                                 |                                | N                                                 |                                | N                                                 |
| CC2595      | Conserved transmembrane protein                                 |      | Y                        | Y                             | N                                                 |                                | N                                                 |                                | N                                                 |
| CC2596      | Conserved transmembrane protein                                 |      | Y                        | N                             | N                                                 |                                | N                                                 |                                | N                                                 |
| CC2597      | Conserved transmembrane protein                                 |      | N                        | N                             | N                                                 |                                | N                                                 |                                | N                                                 |
| CC2598      | Glucose inhibited division protein A                            |      | Y                        | Y                             | N                                                 |                                | N                                                 |                                | N                                                 |
| CC2599      | Ribosomal-protein-alanine acetyltransferase                     |      | N                        | N                             | N                                                 |                                | N                                                 |                                | N                                                 |
| CC2600      | FAD dependent oxidoreductase                                    |      | Y                        | Y                             | N                                                 |                                | Y                                                 | Patchy/Spotty                  | N                                                 |
| CC2601      | Cyclopropane fatty acid synthase and related methyltransferases |      | Y                        | Y                             | N                                                 |                                | Y                                                 | Patchy/Spotty                  | N                                                 |
| CC2602      | Hypothetical protein                                            |      | Y                        | Y                             | N                                                 |                                | N                                                 |                                | N                                                 |
| CC2603      | N-carbamoyl-L-amino acid hydrolase                              |      | Y                        | Y                             | N                                                 |                                | N                                                 |                                | N                                                 |
| CC2604      | Serine-pyruvate aminotransferase                                |      | N                        | N                             | N                                                 |                                | N                                                 |                                | N                                                 |
| CC2605      | Chitooligosaccharide deacetylase                                |      | Y                        | N                             | N                                                 |                                | N                                                 |                                | N                                                 |
| CC2606      | Urate oxidase                                                   |      | Y                        | N                             | N                                                 |                                | N                                                 |                                | N                                                 |
| CC2607      | Hypothetical membrane spanning protein                          |      | Y                        | Y                             | N                                                 |                                | N                                                 |                                | N                                                 |
| CC2608      | Transcriptional regulator, TetR family                          |      | N                        | N                             | N                                                 |                                | N                                                 |                                | N                                                 |
| CC2609      | Hypothetical exported protein                                   |      | N                        | N                             | N                                                 |                                | N                                                 |                                | N                                                 |
| CC2610      | Iron-regulated protein frpC                                     |      | Y                        | Y                             | N                                                 |                                | N                                                 |                                | N                                                 |
| CC2611      | Acetamidase                                                     |      | Y                        | Y                             | N                                                 |                                | N                                                 |                                | N                                                 |
| CC2612      | hypothetical protein                                            |      | N                        | N                             | N                                                 |                                | N                                                 |                                | N                                                 |



| Gene Number | Annotation                                                                    | Gene | Entry Vector Constructed | Entry Vector Sequence Correct | Localized and Sequence-verified C-terminal Fusion | Localization w/ C-terminal Tag | Localized and Sequence-verified N-terminal Fusion | Localization w/ N-terminal Tag | Protein Localized as Both N- or C-terminal Fusion |
|-------------|-------------------------------------------------------------------------------|------|--------------------------|-------------------------------|---------------------------------------------------|--------------------------------|---------------------------------------------------|--------------------------------|---------------------------------------------------|
| CC2613      | Glutamyl-tRNA(Gln) amidotransferase subunit A                                 |      | Y                        | Y                             | N                                                 |                                | N                                                 |                                | N                                                 |
| CC2614      | Hypothetical protein                                                          |      | Y                        | Y                             | N                                                 |                                | N                                                 |                                | N                                                 |
| CC2615      | Inosine-uridine preferring nucleoside hydrolase                               |      | Y                        | Y                             | N                                                 |                                | N                                                 |                                | N                                                 |
| CC2616      | Guanine deaminase                                                             |      | Y                        | Y                             | Y                                                 | Pole                           | N                                                 |                                | N                                                 |
| CC2617      | XdhC protein (assists in molybdopterin insertion into xanthine dehydrogenase) |      | Y                        | Y                             | N                                                 |                                | N                                                 |                                | N                                                 |
| CC2618      | Xanthine dehydrogenase large subunit                                          |      | N                        | N                             | N                                                 |                                | N                                                 |                                | N                                                 |
| CC2619      | Xanthine dehydrogenase small subunit                                          |      | Y                        | Y                             | N                                                 |                                | N                                                 |                                | N                                                 |
| CC2620      | Urate oxidase                                                                 |      | Y                        | Y                             | N                                                 |                                | N                                                 |                                | N                                                 |
| CC2621      | NADP-dependent malic enzyme                                                   |      | Y                        | Y                             | N                                                 |                                | N                                                 |                                | N                                                 |
| CC2622      | Cold shock protein                                                            |      | N                        | N                             | N                                                 |                                | N                                                 |                                | N                                                 |
| CC2623      | tRNA-Met-CAT                                                                  |      | Y                        | Y                             | N                                                 |                                | N                                                 |                                | N                                                 |
| CC2624      |                                                                               |      | Y                        | N                             | N                                                 |                                | N                                                 |                                | N                                                 |
| CC2625      | Rrf2 family protein                                                           |      | Y                        | Y                             | N                                                 |                                | N                                                 |                                | N                                                 |
| CC2626      | CBS domain containing protein                                                 |      | Y                        | Y                             | N                                                 |                                | N                                                 |                                | N                                                 |
| CC2627      | Integral membrane protein (Rhomboid family)                                   |      | Y                        | Y                             | N                                                 |                                | N                                                 |                                | N                                                 |
| CC2628      | holdfast attachment protein hfaA                                              | hfaA | Y                        | Y                             | N                                                 |                                | Y                                                 | Patchy/Spotty                  | N                                                 |
| CC2629      | holdfast attachment protein hfaB                                              | hfaB | Y                        | Y                             | Y                                                 | Patchy/Spotty                  | N                                                 |                                | N                                                 |
| CC2630      | holdfast attachment protein hfaD                                              | hfaD | N                        | N                             | N                                                 |                                | N                                                 |                                | N                                                 |
| CC2631      | ABC transporter ATP-binding protein uup                                       |      | N                        | N                             | N                                                 |                                | N                                                 |                                | N                                                 |
| CC2632      | MASE1-family sensor histidine kinase                                          |      | Y                        | Y                             | N                                                 |                                | N                                                 |                                | N                                                 |
| CC2633      | ABC transporter substrate-binding protein                                     |      | Y                        | Y                             | N                                                 |                                | N                                                 |                                | N                                                 |
| CC2634      | Maltose/maltodextrin transport ATP-binding protein malK                       | malK | N                        | N                             | N                                                 |                                | N                                                 |                                | N                                                 |
| CC2635      | Taurine transport system permease protein tauC                                | tauC | Y                        | Y                             | N                                                 |                                | N                                                 |                                | N                                                 |
| CC2636      | hypothetical protein                                                          |      | N                        | N                             | N                                                 |                                | N                                                 |                                | N                                                 |
| CC2637      | Conserved hypothetical protein                                                |      | N                        | N                             | N                                                 |                                | N                                                 |                                | N                                                 |
| CC2638      | Peptidase, M16 family                                                         |      | N                        | N                             | N                                                 |                                | N                                                 |                                | N                                                 |
| CC2639      | Conserved hypothetical protein                                                |      | Y                        | N                             | N                                                 |                                | N                                                 |                                | N                                                 |
| CC2640      | Hypothetical protein                                                          |      | Y                        | Y                             | N                                                 |                                | N                                                 |                                | N                                                 |
| CC2641      | Oxidoreductase                                                                |      | N                        | N                             | N                                                 |                                | N                                                 |                                | N                                                 |
| CC2642      | Choline dehydrogenase                                                         |      | N                        | N                             | N                                                 |                                | N                                                 |                                | N                                                 |
| CC2643      | Putative acetyltransferase/acyltransferase                                    |      | Y                        | Y                             | N                                                 |                                | N                                                 |                                | N                                                 |
| CC2644      | PhoH protein                                                                  |      | Y                        | Y                             | N                                                 |                                | N                                                 |                                | N                                                 |
| CC2645      | hypothetical protein                                                          |      | N                        | N                             | N                                                 |                                | N                                                 |                                | N                                                 |
| CC2646      | oligopeptide transporter                                                      |      | Y                        | N                             | N                                                 |                                | N                                                 |                                | N                                                 |
| CC2647      | Glutathione S-transferase                                                     |      | Y                        | Y                             | N                                                 |                                | N                                                 |                                | N                                                 |
| CC2648      | Acetyltransferase                                                             |      | Y                        | Y                             | N                                                 |                                | N                                                 |                                | N                                                 |
| CC2649      | Hypothetical protein                                                          |      | Y                        | Y                             | N                                                 |                                | N                                                 |                                | N                                                 |
| CC2650      | Glutaminy-peptide cyclotransferase                                            |      | Y                        | Y                             | N                                                 |                                | N                                                 |                                | N                                                 |
| CC2651      | Serine acetyltransferase                                                      |      | Y                        | Y                             | N                                                 |                                | Y                                                 | Bipolar and Unipolar           | N                                                 |
| CC2652      | Phosphohydrolase (MutT/nudix family protein)                                  |      | Y                        | Y                             | N                                                 |                                | N                                                 |                                | N                                                 |
| CC2653      | Nitroreductase family                                                         |      | Y                        | Y                             | N                                                 |                                | N                                                 |                                | N                                                 |
| CC2654      | Queuosine biosynthesis protein QueF                                           |      | Y                        | Y                             | N                                                 |                                | N                                                 |                                | N                                                 |
| CC2655      | Granaticin polyketide synthase putative ketoacyl reductase 2                  |      | Y                        | Y                             | N                                                 |                                | N                                                 |                                | N                                                 |
| CC2656      | Transposase                                                                   |      | Y                        | N                             | N                                                 |                                | N                                                 |                                | N                                                 |
| CC2657      | Transposase                                                                   |      | Y                        | N                             | N                                                 |                                | N                                                 |                                | N                                                 |
| CC2658      | Hypothetical protein                                                          |      | Y                        | Y                             | N                                                 |                                | N                                                 |                                | N                                                 |

| Gene Number | Annotation                                              | Gene | Entry Vector Constructed | Entry Vector Sequence Correct | Localized and Sequence-verified C-terminal Fusion | Localization w/ C-terminal Tag | Localized and Sequence-verified N-terminal Fusion | Localization w/ N-terminal Tag | Protein Localized as Both N- or C-terminal Fusion |
|-------------|---------------------------------------------------------|------|--------------------------|-------------------------------|---------------------------------------------------|--------------------------------|---------------------------------------------------|--------------------------------|---------------------------------------------------|
| CC2659      | Oxalate/formate antiporter                              |      | Y                        | Y                             | N                                                 |                                | N                                                 |                                | N                                                 |
| CC2660      | TonB dependent receptor                                 |      | Y                        | Y                             | N                                                 |                                | N                                                 |                                | N                                                 |
| CC2661      | Transcriptional regulator, GntR family                  |      | Y                        | N                             | N                                                 |                                | N                                                 |                                | N                                                 |
| CC2662      | Transcriptional regulator, TetR family                  |      | Y                        | Y                             | N                                                 |                                | N                                                 |                                | N                                                 |
| CC2663      | Conserved hypothetical protein                          |      | Y                        | Y                             | N                                                 |                                | N                                                 |                                | N                                                 |
| CC2664      | ABC transporter substrate-binding protein               |      | Y                        | N                             | N                                                 |                                | N                                                 |                                | N                                                 |
| CC2665      | Conserved hypothetical protein                          |      | Y                        | Y                             | N                                                 |                                | N                                                 |                                | N                                                 |
| CC2666      | Hypothetical protein                                    |      | Y                        | Y                             | N                                                 |                                | N                                                 |                                | N                                                 |
| CC2667      |                                                         |      | Y                        | Y                             | N                                                 |                                | Y                                                 | Pole                           | N                                                 |
| CC2668      | ABC transporter permease protein                        |      | Y                        | Y                             | Y                                                 | Patchy/Spotty                  | N                                                 |                                | N                                                 |
| CC2669      | ABC transporter ATP-binding protein                     |      | N                        | N                             | N                                                 |                                | N                                                 |                                | N                                                 |
|             | GAF/PAS-family histidine kinase/receiver protein        |      | Y                        | Y                             | N                                                 |                                | N                                                 |                                | N                                                 |
| CC2670      |                                                         |      | Y                        | Y                             | N                                                 |                                | N                                                 |                                | N                                                 |
| CC2671      | Aminoacyl peptidase                                     |      | Y                        | Y                             | N                                                 |                                | N                                                 |                                | N                                                 |
| CC2672      | Parathion hydrolase                                     |      | Y                        | Y                             | Y                                                 | Patchy/Spotty                  | N                                                 |                                | N                                                 |
| CC2673      | Transcriptional regulator                               |      | Y                        | Y                             | N                                                 |                                | N                                                 |                                | N                                                 |
| CC2674      | Putative competence-damage protein                      |      | Y                        | Y                             | N                                                 |                                | N                                                 |                                | N                                                 |
| CC2675      | Sugar fermentation stimulation protein A                |      | Y                        | Y                             | N                                                 |                                | N                                                 |                                | N                                                 |
| CC2676      | hypothetical protein                                    |      | Y                        | Y                             | N                                                 |                                | N                                                 |                                | N                                                 |
| CC2677      | Methionine aminopeptidase                               |      | N                        | N                             | N                                                 |                                | N                                                 |                                | N                                                 |
| CC2678      | hypothetical protein                                    |      | Y                        | Y                             | N                                                 |                                | N                                                 |                                | N                                                 |
| CC2679      |                                                         |      | Y                        | Y                             | N                                                 |                                | N                                                 |                                | N                                                 |
| CC2680      | DNA repair protein radC                                 |      | Y                        | Y                             | N                                                 |                                | N                                                 |                                | N                                                 |
| CC2681      | Transposase                                             |      | Y                        | Y                             | N                                                 |                                | N                                                 |                                | N                                                 |
| CC2682      | hypothetical protein                                    |      | Y                        | N                             | N                                                 |                                | N                                                 |                                | N                                                 |
| CC2683      | Conserved hypothetical protein                          |      | Y                        | Y                             | N                                                 |                                | N                                                 |                                | N                                                 |
| CC2684      | Conserved hypothetical protein                          |      | Y                        | Y                             | N                                                 |                                | N                                                 |                                | N                                                 |
| CC2685      | Conjugal transfer protein trbI                          |      | Y                        | Y                             | N                                                 |                                | N                                                 |                                | N                                                 |
| CC2686      | Conjugal transfer protein TrbG                          |      | Y                        | Y                             | Y                                                 | Patchy/Spotty                  | N                                                 |                                | N                                                 |
| CC2687      | Conjugal transfer protein trbF                          |      | Y                        | Y                             | N                                                 |                                | N                                                 |                                | N                                                 |
| CC2688      | Conjugal transfer protein trbL                          |      | Y                        | Y                             | N                                                 |                                | N                                                 |                                | N                                                 |
| CC2689      | Transposase                                             |      | Y                        | N                             | N                                                 |                                | N                                                 |                                | N                                                 |
| CC2690      | Transposase                                             |      | Y                        | N                             | N                                                 |                                | N                                                 |                                | N                                                 |
| CC2691      | Methyl-accepting chemotaxis protein                     |      | Y                        | Y                             | N                                                 |                                | N                                                 |                                | N                                                 |
| CC2692      | hypothetical protein                                    |      | Y                        | Y                             | N                                                 |                                | N                                                 |                                | N                                                 |
| CC2693      | hypothetical protein                                    |      | Y                        | Y                             | N                                                 |                                | N                                                 |                                | N                                                 |
|             | Adenosylcobyrinic acid synthase (glutamine-hydrolysing) |      | N                        | N                             | N                                                 |                                | N                                                 |                                | N                                                 |
| CC2694      |                                                         |      | N                        | N                             | N                                                 |                                | N                                                 |                                | N                                                 |
| CC2695      | Vitamin B12 receptor                                    |      | Y                        | Y                             | N                                                 |                                | N                                                 |                                | N                                                 |
| CC2696      | Hypothetical protein                                    |      | Y                        | Y                             | N                                                 |                                | N                                                 |                                | N                                                 |
| CC2697      | hypothetical protein                                    |      | Y                        | Y                             | N                                                 |                                | N                                                 |                                | N                                                 |
| CC2698      | hypothetical protein                                    |      | Y                        | Y                             | N                                                 |                                | N                                                 |                                | N                                                 |
| CC2699      | hypothetical protein                                    |      | Y                        | Y                             | N                                                 |                                | N                                                 |                                | N                                                 |
| CC2700      | Two-component response regulator                        |      | Y                        | Y                             | N                                                 |                                | N                                                 |                                | N                                                 |
| CC2701      | Conserved hypothetical protein                          |      | Y                        | Y                             | N                                                 |                                | N                                                 |                                | N                                                 |
| CC2702      | Hypothetical protein                                    |      | Y                        | Y                             | N                                                 |                                | N                                                 |                                | N                                                 |
| CC2703      | Guanylate cyclase                                       |      | Y                        | Y                             | N                                                 |                                | N                                                 |                                | N                                                 |
| CC2704      | hypothetical protein                                    |      | Y                        | Y                             | N                                                 |                                | Y                                                 | Bipolar and Unipolar           | N                                                 |
| CC2705      | Transcriptional regulator, Xre family                   |      | Y                        | Y                             | N                                                 |                                | N                                                 |                                | N                                                 |
| CC2706      | Transcriptional regulator, Xre family                   |      | Y                        | Y                             | N                                                 |                                | N                                                 |                                | N                                                 |
| CC2707      | RNA polymerase ECF-type sigma factor                    |      | Y                        | N                             | N                                                 |                                | N                                                 |                                | N                                                 |
| CC2708      | FecR family protein                                     |      | N                        | N                             | N                                                 |                                | N                                                 |                                | N                                                 |
| CC2709      | TonB-dependent outer membrane receptor                  |      | N                        | N                             | N                                                 |                                | N                                                 |                                | N                                                 |

| Gene Number | Annotation                                                                    | Gene   | Entry Vector Constructed | Entry Vector Sequence Correct | Localized and Sequence-verified C-terminal Fusion | Localization w/ C-terminal Tag | Localized and Sequence-verified N-terminal Fusion | Localization w/ N-terminal Tag | Protein Localized as Both N- or C-terminal Fusion |
|-------------|-------------------------------------------------------------------------------|--------|--------------------------|-------------------------------|---------------------------------------------------|--------------------------------|---------------------------------------------------|--------------------------------|---------------------------------------------------|
| CC2710      | Acylamino-acid-releasing enzyme Asparagine synthetase [glutamine-hydrolyzing] |        | N                        | N                             | N                                                 |                                | N                                                 |                                | N                                                 |
| CC2711      |                                                                               |        | Y                        | Y                             | N                                                 |                                | N                                                 |                                | N                                                 |
| CC2712      | Conserved hypothetical protein                                                |        | Y                        | Y                             | N                                                 |                                | N                                                 |                                | N                                                 |
| CC2713      | hypothetical protein                                                          |        | Y                        | Y                             | N                                                 |                                | N                                                 |                                | N                                                 |
| CC2714      | putative GntR-family transcriptional regulator                                |        | N                        | N                             | N                                                 |                                | N                                                 |                                | N                                                 |
| CC2715      | hypothetical protein                                                          |        | Y                        | Y                             | N                                                 |                                | N                                                 |                                | N                                                 |
| CC2716      | HTH/XRE-family transcriptional regulator                                      |        | Y                        | Y                             | N                                                 |                                | N                                                 |                                | N                                                 |
| CC2717      | Conserved hypothetical protein                                                |        | Y                        | Y                             | N                                                 |                                | N                                                 |                                | N                                                 |
| CC2718      | Conserved hypothetical protein                                                |        | Y                        | N                             | N                                                 |                                | N                                                 |                                | N                                                 |
| CC2719      | hypothetical protein                                                          |        | N                        | N                             | N                                                 |                                | N                                                 |                                | N                                                 |
| CC2720      |                                                                               |        | Y                        | Y                             | N                                                 |                                | N                                                 |                                | N                                                 |
| CC2721      | Nickel-cobalt-cadmium resistance protein nccC                                 |        | N                        | N                             | N                                                 |                                | N                                                 |                                | N                                                 |
| CC2722      | Nickel-cobalt-cadmium resistance protein nccB                                 |        | Y                        | Y                             | N                                                 |                                | N                                                 |                                | N                                                 |
| CC2723      | hypothetical protein                                                          |        | Y                        | Y                             | N                                                 |                                | N                                                 |                                | N                                                 |
| CC2724      | AcrB-family cation/multidrug efflux pump                                      |        | N                        | N                             | N                                                 |                                | N                                                 |                                | N                                                 |
| CC2725      | Hypothetical protein<br>Lead, cadmium, zinc and mercury transporting ATPase   |        | Y                        | Y                             | Y                                                 | Pole                           | N                                                 |                                | N                                                 |
| CC2726      | Glutaredoxin                                                                  |        | Y                        | Y                             | N                                                 |                                | N                                                 |                                | N                                                 |
| CC2727      |                                                                               |        | Y                        | Y                             | N                                                 |                                | N                                                 |                                | N                                                 |
| CC2728      |                                                                               |        | Y                        | N                             | N                                                 |                                | N                                                 |                                | N                                                 |
| CC2729      | Transposase                                                                   |        | Y                        | N                             | N                                                 |                                | N                                                 |                                | N                                                 |
| CC2730      | Ice nucleation protein                                                        |        | Y                        | Y                             | N                                                 |                                | N                                                 |                                | N                                                 |
| CC2731      | hypothetical protein                                                          |        | Y                        | Y                             | N                                                 |                                | N                                                 |                                | N                                                 |
| CC2732      | retrotransposon-related protein                                               |        | Y                        | Y                             | N                                                 |                                | N                                                 |                                | N                                                 |
| CC2733      | hypothetical protein                                                          |        | Y                        | Y                             | N                                                 |                                | N                                                 |                                | N                                                 |
| CC2734      | possible IS element                                                           |        | Y                        | Y                             | N                                                 |                                | N                                                 |                                | N                                                 |
| CC2735      | hipA-related phosphatidylinositol 3/4-kinase                                  |        | Y                        | Y                             | N                                                 |                                | N                                                 |                                | N                                                 |
| CC2736      | Transcriptional regulator, MerR family                                        |        | Y                        | Y                             | N                                                 |                                | N                                                 |                                | N                                                 |
| CC2737      | hypothetical protein                                                          |        | Y                        | Y                             | N                                                 |                                | N                                                 |                                | N                                                 |
| CC2738      | hypothetical protein                                                          |        | Y                        | Y                             | N                                                 |                                | N                                                 |                                | N                                                 |
| CC2739      | Transposase                                                                   |        | Y                        | Y                             | N                                                 |                                | N                                                 |                                | N                                                 |
| CC2740      | Antisense sRNA to IS1111A transposase                                         |        | Y                        | Y                             | Y                                                 | Patchy/Spotty                  | N                                                 |                                | N                                                 |
| CC2741      | Transposase                                                                   |        | Y                        | N                             | N                                                 |                                | N                                                 |                                | N                                                 |
| CC2742      | Transposase                                                                   |        | Y                        | N                             | N                                                 |                                | N                                                 |                                | N                                                 |
| CC2743      | Transposase                                                                   |        | Y                        | Y                             | N                                                 |                                | N                                                 |                                | N                                                 |
| CC2744      | DNA repair protein radC                                                       |        | Y                        | Y                             | N                                                 |                                | N                                                 |                                | N                                                 |
| CC2745      | Conserved hypothetical protein                                                |        | Y                        | Y                             | N                                                 |                                | N                                                 |                                | N                                                 |
| CC2746      | Microsomal dipeptidase                                                        |        | Y                        | Y                             | N                                                 |                                | N                                                 |                                | N                                                 |
| CC2747      | Hypothetical membrane spanning protein                                        |        | Y                        | Y                             | N                                                 |                                | N                                                 |                                | N                                                 |
| CC2748      | Molybdopterin dependent oxidoreductase                                        |        | Y                        | Y                             | N                                                 |                                | N                                                 |                                | N                                                 |
| CC2749      | Conserved hypothetical protein                                                |        | N                        | N                             | N                                                 |                                | N                                                 |                                | N                                                 |
| CC2750      | Conserved hypothetical protein                                                |        | N                        | N                             | N                                                 |                                | N                                                 |                                | N                                                 |
| CC2751      | RNA polymerase ECF-type sigma factor                                          |        | Y                        | Y                             | N                                                 |                                | N                                                 |                                | N                                                 |
| CC2752      | EF hand domain protein<br>Glutamate-ammonia-ligase                            |        | Y                        | Y                             | Y                                                 | Patchy/Spotty                  | N                                                 |                                | N                                                 |
| CC2753      | adenylyltransferase                                                           |        | Y                        | N                             | N                                                 |                                | N                                                 |                                | N                                                 |
| CC2754      | Transcriptional regulator                                                     |        | Y                        | Y                             | N                                                 |                                | N                                                 |                                | N                                                 |
| CC2755      | two-component sensor histidine kinase                                         |        | N                        | N                             | N                                                 |                                | N                                                 |                                | N                                                 |
| CC2756      | toxin protein parE-3                                                          | parE-3 | Y                        | Y                             | N                                                 |                                | N                                                 |                                | N                                                 |
| CC2757      | Two-component response regulator                                              |        | Y                        | Y                             | N                                                 |                                | N                                                 |                                | N                                                 |

| Gene Number | Annotation                                                       | Gene | Entry Vector Constructed | Entry Vector Sequence Correct | Localized and Sequence-verified C-terminal Fusion | Localization w/ C-terminal Tag | Localized and Sequence-verified N-terminal Fusion | Localization w/ N-terminal Tag | Protein Localized as Both N- or C-terminal Fusion |
|-------------|------------------------------------------------------------------|------|--------------------------|-------------------------------|---------------------------------------------------|--------------------------------|---------------------------------------------------|--------------------------------|---------------------------------------------------|
| CC2758      | Endopeptidase degP                                               |      | Y                        | Y                             | N                                                 |                                | N                                                 |                                | N                                                 |
| CC2759      | Cytochrome c-type biogenesis protein ccmH                        |      | Y                        | Y                             | N                                                 |                                | N                                                 |                                | N                                                 |
| CC2760      | Heme chaperone--apocytochrome heme-lyase                         |      | Y                        | Y                             | N                                                 |                                | N                                                 |                                | N                                                 |
| CC2761      | Cytochrome c-type biogenesis heme chaperone                      |      | Y                        | Y                             | N                                                 |                                | N                                                 |                                | N                                                 |
| CC2762      | Cytochrome c-type biogenesis protein ccmI                        |      | Y                        | Y                             | N                                                 |                                | N                                                 |                                | N                                                 |
| CC2763      | Alpha/beta hydrolase family protein                              |      | Y                        | N                             | N                                                 |                                | N                                                 |                                | N                                                 |
| CC2764      | hypothetical protein                                             |      | N                        | N                             | N                                                 |                                | N                                                 |                                | N                                                 |
| CC2765      | two-component sensor histidine kinase                            |      | N                        | N                             | N                                                 |                                | N                                                 |                                | N                                                 |
| CC2766      | Two-component response regulator                                 |      | Y                        | Y                             | N                                                 |                                | N                                                 |                                | N                                                 |
| CC2767      | hypothetical protein                                             |      | Y                        | Y                             | N                                                 |                                | N                                                 |                                | N                                                 |
| CC2768      | hypothetical glycine-rich protein                                |      | Y                        | N                             | N                                                 |                                | N                                                 |                                | N                                                 |
| CC2769      | hypothetical protein                                             |      | Y                        | Y                             | N                                                 |                                | N                                                 |                                | N                                                 |
| CC2770      | hipA-family phosphatidylinositol 3/4-kinase                      |      | Y                        | Y                             | N                                                 |                                | N                                                 |                                | N                                                 |
| CC2771      | Conserved hypothetical protein                                   |      | Y                        | Y                             | N                                                 |                                | N                                                 |                                | N                                                 |
| CC2772      | Chaperone protein dnaJ                                           |      | N                        | N                             | N                                                 |                                | N                                                 |                                | N                                                 |
| CC2773      | Phage Host Specificity Protein                                   |      | N                        | N                             | N                                                 |                                | N                                                 |                                | N                                                 |
| CC2774      | Phage Host Specificity Protein                                   |      | Y                        | Y                             | N                                                 |                                | N                                                 |                                | N                                                 |
| CC2775      | Spr-family cell wall-associated hydrolase                        |      | Y                        | N                             | N                                                 |                                | N                                                 |                                | N                                                 |
| CC2776      | Phage protein                                                    |      | Y                        | Y                             | N                                                 |                                | N                                                 |                                | N                                                 |
| CC2777      | Phage protein                                                    |      | Y                        | N                             | N                                                 |                                | N                                                 |                                | N                                                 |
| CC2778      | Conserved membrane protein                                       |      | Y                        | Y                             | Y                                                 | Patchy/Spotty                  | N                                                 |                                | N                                                 |
| CC2779      | phage tail length tape measure-related protein                   |      | Y                        | Y                             | N                                                 |                                | N                                                 |                                | N                                                 |
| CC2780      | gene transfer agent (GTA) protein                                |      | Y                        | Y                             | N                                                 |                                | N                                                 |                                | N                                                 |
| CC2781      | Phage protein                                                    |      | Y                        | Y                             | N                                                 |                                | N                                                 |                                | N                                                 |
| CC2782      | gene transfer agent (GTA)-related protein                        |      | N                        | N                             | N                                                 |                                | N                                                 |                                | N                                                 |
| CC2783      | Phage Prohead Protease                                           |      | N                        | N                             | N                                                 |                                | N                                                 |                                | N                                                 |
| CC2784      |                                                                  |      | N                        | N                             | N                                                 |                                | N                                                 |                                | N                                                 |
| CC2785      | Glyoxalase/Bleomycin resistance protein, dioxygenase superfamily |      | Y                        | Y                             | N                                                 |                                | N                                                 |                                | N                                                 |
| CC2786      | Phage Prohead Protease                                           |      | Y                        | Y                             | N                                                 |                                | N                                                 |                                | N                                                 |
| CC2787      | Conserved hypothetical protein                                   |      | Y                        | Y                             | N                                                 |                                | N                                                 |                                | N                                                 |
| CC2788      | Portal protein                                                   |      | Y                        | Y                             | N                                                 |                                | N                                                 |                                | N                                                 |
| CC2789      | genetic exchange protein, putative                               |      | Y                        | N                             | N                                                 |                                | N                                                 |                                | N                                                 |
| CC2790      | Phage DNA Packaging Protein                                      |      | Y                        | Y                             | N                                                 |                                | N                                                 |                                | N                                                 |
| CC2791      | oxoglutarate semialdehyde dehydrogenase                          |      | Y                        | Y                             | N                                                 |                                | N                                                 |                                | N                                                 |
| CC2792      | Cytochrome C6, putative                                          |      | Y                        | Y                             | N                                                 |                                | N                                                 |                                | N                                                 |
| CC2793      | Amine oxidase [flavin-containing]                                |      | Y                        | Y                             | N                                                 |                                | N                                                 |                                | N                                                 |
| CC2794      | Transcriptional regulator, TetR family                           |      | Y                        | N                             | N                                                 |                                | N                                                 |                                | N                                                 |
| CC2795      | Isochorismatase family protein                                   |      | N                        | N                             | N                                                 |                                | N                                                 |                                | N                                                 |
| CC2796      | Translation initiation inhibitor                                 |      | Y                        | Y                             | N                                                 |                                | N                                                 |                                | N                                                 |
| CC2797      | Hydrolase/acyltransferase family protein                         |      | Y                        | Y                             | N                                                 |                                | N                                                 |                                | N                                                 |
| CC2798      | nitrilotriacetate monooxygenase                                  |      | Y                        | Y                             | N                                                 |                                | N                                                 |                                | N                                                 |
| CC2799      | Peptidyl-prolyl cis-trans isomerase                              |      | Y                        | Y                             | N                                                 |                                | N                                                 |                                | N                                                 |
| CC2800      | hypothetical protein                                             |      | Y                        | N                             | N                                                 |                                | N                                                 |                                | N                                                 |
| CC2801      | Beta-galactosidase                                               |      | Y                        | Y                             | N                                                 |                                | N                                                 |                                | N                                                 |
| CC2802      | Beta-xylosidase / Alpha-L-arabinofuranosidase                    |      | Y                        | Y                             | N                                                 |                                | N                                                 |                                | N                                                 |
| CC2803      | Endo-1,4-beta-xylanase                                           |      | N                        | N                             | N                                                 |                                | N                                                 |                                | N                                                 |
| CC2804      | TonB-dependent receptor                                          |      | Y                        | Y                             | N                                                 |                                | N                                                 |                                | N                                                 |
| CC2805      | Tryptophan halogenase                                            |      | Y                        | Y                             | N                                                 |                                | N                                                 |                                | N                                                 |

| Gene Number | Annotation                                       | Gene | Entry Vector Constructed | Entry Vector Sequence Correct | Localized and Sequence-verified C-terminal Fusion | Localization w/ C-terminal Tag | Localized and Sequence-verified N-terminal Fusion | Localization w/ N-terminal Tag | Protein Localized as Both N- or C-terminal Fusion |
|-------------|--------------------------------------------------|------|--------------------------|-------------------------------|---------------------------------------------------|--------------------------------|---------------------------------------------------|--------------------------------|---------------------------------------------------|
| CC2806      | Tryptophan halogenase                            |      | Y                        | Y                             | N                                                 |                                | N                                                 |                                | N                                                 |
| CC2807      | Tryptophan halogenase                            |      | Y                        | Y                             | N                                                 |                                | N                                                 |                                | N                                                 |
| CC2808      | Tryptophan halogenase                            |      | Y                        | Y                             | N                                                 |                                | N                                                 |                                | N                                                 |
| CC2809      | N-acyl-L-amino acid amidohydrolase               |      | Y                        | N                             | N                                                 |                                | N                                                 |                                | N                                                 |
| CC2810      | Methyl-accepting chemotaxis protein              |      | Y                        | Y                             | N                                                 |                                | N                                                 |                                | N                                                 |
| CC2811      | Xylan alpha-1,2-glucuronosidase                  |      | Y                        | Y                             | N                                                 |                                | N                                                 |                                | N                                                 |
| CC2812      | Starvation sensing protein rspA                  |      | Y                        | N                             | N                                                 |                                | N                                                 |                                | N                                                 |
| CC2813      | Transcriptional regulator, GntR family           |      | Y                        | Y                             | N                                                 |                                | N                                                 |                                | N                                                 |
| CC2814      | Hypothetical cytosolic protein                   |      | Y                        | Y                             | N                                                 |                                | N                                                 |                                | N                                                 |
| CC2815      | Acyltransferase family protein                   |      | N                        | N                             | N                                                 |                                | N                                                 |                                | N                                                 |
| CC2816      | Transposase                                      |      | Y                        | N                             | N                                                 |                                | N                                                 |                                | N                                                 |
| CC2817      | Hydrolase (HAD superfamily)                      |      | Y                        | Y                             | N                                                 |                                | N                                                 |                                | N                                                 |
| CC2818      | Tetratricopeptide repeat (TPR) protein           |      | N                        | N                             | N                                                 |                                | N                                                 |                                | N                                                 |
| CC2819      | TonB-dependent receptor                          |      | Y                        | Y                             | N                                                 |                                | N                                                 |                                | N                                                 |
| CC2820      | hypothetical protein                             |      | Y                        | Y                             | N                                                 |                                | N                                                 |                                | N                                                 |
| CC2821      | Conserved hypothetical protein                   |      | Y                        | Y                             | N                                                 |                                | N                                                 |                                | N                                                 |
| CC2822      |                                                  |      | Y                        | N                             | N                                                 |                                | N                                                 |                                | N                                                 |
| CC2823      | Zinc metalloprotease                             |      | Y                        | Y                             | N                                                 |                                | N                                                 |                                | N                                                 |
| CC2824      | Microcin-processing peptidase 1 (PmbA)           |      | Y                        | Y                             | N                                                 |                                | N                                                 |                                | N                                                 |
| CC2825      | Conserved hypothetical protein                   |      | Y                        | Y                             | N                                                 |                                | N                                                 |                                | N                                                 |
| CC2826      | MoxR-like ATPases                                |      | N                        | N                             | N                                                 |                                | N                                                 |                                | N                                                 |
| CC2827      | MoxR protein                                     |      | N                        | N                             | N                                                 |                                | N                                                 |                                | N                                                 |
| CC2828      | Conserved hypothetical protein                   |      | N                        | N                             | N                                                 |                                | N                                                 |                                | N                                                 |
| CC2829      | membrane-anchored conserved hypothetical protein |      | Y                        | N                             | N                                                 |                                | N                                                 |                                | N                                                 |
| CC2830      | membrane-anchored conserved hypothetical protein |      | N                        | N                             | N                                                 |                                | N                                                 |                                | N                                                 |
| CC2831      | hypothetical protein                             |      | Y                        | Y                             | N                                                 |                                | N                                                 |                                | N                                                 |
| CC2832      | TonB-dependent receptor                          |      | Y                        | N                             | N                                                 |                                | N                                                 |                                | N                                                 |
| CC2833      | Hypothetical cytosolic protein                   |      | Y                        | Y                             | N                                                 |                                | N                                                 |                                | N                                                 |
| CC2834      | Carbamoyl-phosphate synthase small chain         |      | Y                        | Y                             | N                                                 |                                | N                                                 |                                | N                                                 |
| CC2835      | hypothetical protein                             |      | Y                        | Y                             | N                                                 |                                | N                                                 |                                | N                                                 |
| CC2836      | Short chain dehydrogenase                        |      | Y                        | Y                             | N                                                 |                                | N                                                 |                                | N                                                 |
| CC2837      | Sorbitol dehydrogenase                           |      | Y                        | Y                             | N                                                 |                                | N                                                 |                                | N                                                 |
| CC2838      | Hypothetical cytosolic protein                   |      | Y                        | N                             | N                                                 |                                | N                                                 |                                | N                                                 |
| CC2839      | figE-related flagellar hook protein              |      | N                        | N                             | N                                                 |                                | N                                                 |                                | N                                                 |
| CC2840      | Aminopeptidase                                   |      | Y                        | N                             | N                                                 |                                | N                                                 |                                | N                                                 |
| CC2841      | Conserved hypothetical protein                   |      | N                        | N                             | N                                                 |                                | N                                                 |                                | N                                                 |
| CC2843      | Methyl-accepting chemotaxis protein              |      | Y                        | Y                             | N                                                 |                                | N                                                 |                                | N                                                 |
| CC2843      | Glutathione S-transferase                        |      | Y                        | Y                             | N                                                 |                                | N                                                 |                                | N                                                 |
| CC2844      | hypothetical protein                             |      | Y                        | Y                             | N                                                 |                                | N                                                 |                                | N                                                 |
| CC2845      | Outer membrane protein A                         |      | Y                        | Y                             | N                                                 |                                | N                                                 |                                | N                                                 |
| CC2846      | Conserved hypothetical protein                   |      | Y                        | Y                             | N                                                 |                                | N                                                 |                                | N                                                 |
| CC2847      | Methyl-accepting chemotaxis protein              |      | Y                        | Y                             | Y                                                 | Pole                           | Y                                                 | Pole                           | Y                                                 |
| CC2848      | Transcription elongation factor greA             | greA | Y                        | Y                             | N                                                 |                                | N                                                 |                                | N                                                 |
| CC2849      | Hypothetical protein                             |      | N                        | N                             | N                                                 |                                | N                                                 |                                | N                                                 |
| CC2850      | hypothetical protein                             |      | Y                        | Y                             | N                                                 |                                | N                                                 |                                | N                                                 |
| CC2851      | hypothetical protein                             |      | N                        | N                             | N                                                 |                                | N                                                 |                                | N                                                 |
| CC2852      | PAS-family sensor histidine kinase               |      | N                        | N                             | N                                                 |                                | N                                                 |                                | N                                                 |
| CC2853      | spsF-related cytidyltransferase                  |      | N                        | N                             | N                                                 |                                | N                                                 |                                | N                                                 |
| CC2854      | spsG-related polysaccharide biosynthesis protein |      | N                        | N                             | N                                                 |                                | N                                                 |                                | N                                                 |
| CC2855      | hypothetical protein                             |      | Y                        | Y                             | N                                                 |                                | N                                                 |                                | N                                                 |

| Gene Number | Annotation                                                                              | Gene   | Entry Vector Constructed | Entry Vector Sequence Correct | Localized and Sequence-verified C-terminal Fusion | Localization w/ C-terminal Tag | Localized and Sequence-verified N-terminal Fusion | Localization w/ N-terminal Tag | Protein Localized as Both N- or C-terminal Fusion |
|-------------|-----------------------------------------------------------------------------------------|--------|--------------------------|-------------------------------|---------------------------------------------------|--------------------------------|---------------------------------------------------|--------------------------------|---------------------------------------------------|
| CC2856      | Hypothetical protein                                                                    |        | Y                        | Y                             | N                                                 |                                | N                                                 |                                | N                                                 |
| CC2857      | Hypothetical protein                                                                    |        | Y                        | Y                             | N                                                 |                                | N                                                 |                                | N                                                 |
| CC2858      | hypothetical protein                                                                    |        | Y                        | N                             | N                                                 |                                | N                                                 |                                | N                                                 |
| CC2859      |                                                                                         |        | Y                        | Y                             | N                                                 |                                | N                                                 |                                | N                                                 |
| CC2860      | N-acetylglucosaminide beta-1,6-N-acetylglucosaminyltransferase                          |        | Y                        | Y                             | N                                                 |                                | N                                                 |                                | N                                                 |
| CC2861      | 11-cis retinol dehydrogenase                                                            |        | Y                        | Y                             | N                                                 |                                | N                                                 |                                | N                                                 |
| CC2862      | Putative permease                                                                       |        | Y                        | N                             | N                                                 |                                | N                                                 |                                | N                                                 |
| CC2863      | Rhodanese-related sulfurtransferases                                                    |        | Y                        | Y                             | N                                                 |                                | N                                                 |                                | N                                                 |
| CC2864      | Transcriptional regulator, ArsR family                                                  |        | Y                        | Y                             | N                                                 |                                | N                                                 |                                | N                                                 |
| CC2865      | hypothetical protein                                                                    |        | Y                        | N                             | N                                                 |                                | N                                                 |                                | N                                                 |
| CC2866      | Zn-dependent hydrolase, glyoxalase II family                                            |        | Y                        | N                             | N                                                 |                                | N                                                 |                                | N                                                 |
| CC2867      | HTH DNA-binding protein, vapI                                                           |        | N                        | N                             | N                                                 |                                | N                                                 |                                | N                                                 |
| CC2868      | N-acetylneuraminate synthase                                                            |        | Y                        | Y                             | N                                                 |                                | N                                                 |                                | N                                                 |
| CC2869      | Hypothetical protein                                                                    |        | Y                        | Y                             | N                                                 |                                | N                                                 |                                | N                                                 |
| CC2870      | Conserved hypothetical protein                                                          |        | N                        | N                             | N                                                 |                                | N                                                 |                                | N                                                 |
| CC2871      | Thioredoxin reductase                                                                   |        | Y                        | Y                             | N                                                 |                                | N                                                 |                                | N                                                 |
| CC2872      | Cell wall hydrolase family protein                                                      |        | Y                        | Y                             | N                                                 |                                | N                                                 |                                | N                                                 |
|             | Non-specific DNA-binding protein Dps / Iron-binding ferritin-like antioxidant protein / |        |                          |                               |                                                   |                                |                                                   |                                |                                                   |
| CC2873      | Ferroxidase                                                                             |        | Y                        | Y                             | Y                                                 | Pole                           | N                                                 |                                | N                                                 |
| CC2874      | PAS-family sensor histidine kinase                                                      |        | Y                        | N                             | N                                                 |                                | N                                                 |                                | N                                                 |
| CC2875      | hypothetical protein                                                                    |        | Y                        | Y                             | N                                                 |                                | N                                                 |                                | N                                                 |
| CC2876      | Transcriptional regulator, TetR family                                                  |        | Y                        | Y                             | N                                                 |                                | N                                                 |                                | N                                                 |
| CC2877      | Hypothetical membrane spanning protein                                                  |        | Y                        | Y                             | N                                                 |                                | N                                                 |                                | N                                                 |
| CC2878      | Conserved hypothetical protein                                                          |        | Y                        | Y                             | N                                                 |                                | N                                                 |                                | N                                                 |
| CC2879      | antitoxin protein relB-3                                                                | relB-3 | Y                        | Y                             | N                                                 |                                | N                                                 |                                | N                                                 |
| CC2880      | toxin protein relE-3                                                                    | relE-3 | Y                        | Y                             | N                                                 |                                | N                                                 |                                | N                                                 |
| CC2881      | Excinuclease ABC subunit C                                                              |        | Y                        | Y                             | N                                                 |                                | N                                                 |                                | N                                                 |
| CC2882      | hypothetical protein                                                                    |        | N                        | N                             | N                                                 |                                | N                                                 |                                | N                                                 |
| CC2883      | RNA polymerase ECF-type sigma factor sigU                                               | sigU   | Y                        | Y                             | N                                                 |                                | N                                                 |                                | N                                                 |
| CC2884      | Two-component sensor histidine kinase                                                   |        | Y                        | Y                             | N                                                 |                                | N                                                 |                                | N                                                 |
|             | Cysteine desulhydrase / Selenocysteine lyase                                            |        | N                        | N                             | N                                                 |                                | N                                                 |                                | N                                                 |
| CC2885      |                                                                                         |        | N                        | N                             | N                                                 |                                | N                                                 |                                | N                                                 |
| CC2886      | Tryptophan 2,3-dioxygenase                                                              |        | Y                        | Y                             | N                                                 |                                | N                                                 |                                | N                                                 |
| CC2887      | Transcriptional regulator, AsnC family                                                  |        | N                        | N                             | N                                                 |                                | N                                                 |                                | N                                                 |
| CC2888      | Porin                                                                                   |        | N                        | N                             | N                                                 |                                | N                                                 |                                | N                                                 |
|             | Polyprenyl-phosphate beta-D-glucosyltransferase                                         |        | Y                        | Y                             | N                                                 |                                | N                                                 |                                | N                                                 |
| CC2889      |                                                                                         |        | Y                        | Y                             | N                                                 |                                | N                                                 |                                | N                                                 |
| CC2890      | Monosaccharide translocase (flippase type)                                              |        | Y                        | Y                             | N                                                 |                                | N                                                 |                                | N                                                 |
| CC2891      | Methyltransferase                                                                       |        | Y                        | Y                             | N                                                 |                                | Y                                                 | Patchy/Spotty                  | N                                                 |
| CC2892      | phage-related conserved hypothetical protein                                            |        | Y                        | Y                             | N                                                 |                                | N                                                 |                                | N                                                 |
| CC2893      | hypothetical protein                                                                    |        | N                        | N                             | N                                                 |                                | N                                                 |                                | N                                                 |
|             | Glyoxalase/Bleomycin resistance protein, dioxygenase superfamily                        |        | Y                        | Y                             | N                                                 |                                | N                                                 |                                | N                                                 |
| CC2894      |                                                                                         |        | Y                        | Y                             | N                                                 |                                | N                                                 |                                | N                                                 |
| CC2895      | hypothetical protein                                                                    |        | Y                        | Y                             | N                                                 |                                | N                                                 |                                | N                                                 |
| CC2896      | hypothetical protein                                                                    |        | Y                        | N                             | N                                                 |                                | N                                                 |                                | N                                                 |
| CC2897      | Transposase                                                                             |        | Y                        | N                             | N                                                 |                                | N                                                 |                                | N                                                 |
| CC2898      | Hypothetical membrane spanning protein                                                  |        | Y                        | Y                             | N                                                 |                                | N                                                 |                                | N                                                 |
| CC2899      | NADH-ubiquinone oxidoreductase                                                          |        | Y                        | Y                             | N                                                 |                                | N                                                 |                                | N                                                 |
| CC2900      | Carbamoyl-phosphate synthase large chain                                                |        | Y                        | N                             | N                                                 |                                | N                                                 |                                | N                                                 |
| CC2901      | Glutathione S-transferase                                                               |        | Y                        | Y                             | N                                                 |                                | N                                                 |                                | N                                                 |
| CC2902      | Patatin family phospholipase domain protein                                             |        | N                        | N                             | N                                                 |                                | N                                                 |                                | N                                                 |

| Gene Number | Annotation                                                                             | Gene | Entry Vector Constructed | Entry Vector Sequence Correct | Localized and Sequence-verified C-terminal Fusion | Localization w/ C-terminal Tag | Localized and Sequence-verified N-terminal Fusion | Localization w/ N-terminal Tag | Protein Localized as Both N- or C-terminal Fusion |
|-------------|----------------------------------------------------------------------------------------|------|--------------------------|-------------------------------|---------------------------------------------------|--------------------------------|---------------------------------------------------|--------------------------------|---------------------------------------------------|
| CC2903      | Cold shock protein                                                                     |      | Y                        | Y                             | N                                                 |                                | N                                                 |                                | N                                                 |
| CC2904      | Conserved hypothetical protein                                                         |      | N                        | N                             | N                                                 |                                | N                                                 |                                | N                                                 |
| CC2905      | Hypothetical protein                                                                   |      | Y                        | Y                             | N                                                 |                                | N                                                 |                                | N                                                 |
| CC2906      | Conserved hypothetical protein                                                         |      | Y                        | Y                             | N                                                 |                                | N                                                 |                                | N                                                 |
| CC2907      |                                                                                        |      | Y                        | Y                             | N                                                 |                                | N                                                 |                                | N                                                 |
| CC2908      | CDP-diacylglycerol--glycerol-3-phosphate 3-phosphatidyltransferase                     |      | Y                        | Y                             | N                                                 |                                | N                                                 |                                | N                                                 |
| CC2909      | Two component sensor histidine kinase                                                  |      | Y                        | Y                             | N                                                 |                                | N                                                 |                                | N                                                 |
| CC2910      | Hypothetical cytosolic protein                                                         |      | N                        | N                             | N                                                 |                                | N                                                 |                                | N                                                 |
| CC2911      | Conserved hypothetical protein                                                         |      | Y                        | Y                             | N                                                 |                                | N                                                 |                                | N                                                 |
| CC2912      | Quinolinate synthetase A                                                               |      | Y                        | Y                             | N                                                 |                                | N                                                 |                                | N                                                 |
| CC2913      | L-aspartate oxidase                                                                    |      | Y                        | Y                             | N                                                 |                                | N                                                 |                                | N                                                 |
| CC2914      | Putative PD-(D/E)xK nuclease family protein<br>Nicotinate-nucleotide pyrophosphorylase |      | Y                        | Y                             | N                                                 |                                | N                                                 |                                | N                                                 |
| CC2915      | [carboxylating]                                                                        |      | Y                        | Y                             | N                                                 |                                | N                                                 |                                | N                                                 |
| CC2916      | Conserved hypothetical protein                                                         |      | N                        | N                             | N                                                 |                                | N                                                 |                                | N                                                 |
| CC2917      | Outer membrane lipoprotein Blc                                                         |      | Y                        | Y                             | N                                                 |                                | N                                                 |                                | N                                                 |
| CC2918      | Peroxioredoxin<br>Peroxioredoxin reductase (NAD(P)H) / NADH oxidase H2O2-forming       |      | Y                        | Y                             | N                                                 |                                | N                                                 |                                | N                                                 |
| CC2919      |                                                                                        |      | Y                        | Y                             | Y                                                 | Pole                           | N                                                 |                                | N                                                 |
| CC2920      | Hypothetical protein                                                                   |      | Y                        | Y                             | N                                                 |                                | N                                                 |                                | N                                                 |
| CC2921      | Hypothetical transcriptional regulatory protein                                        |      | Y                        | N                             | N                                                 |                                | N                                                 |                                | N                                                 |
| CC2922      | Hydrogenase, cytochrome b-type subunit                                                 |      | Y                        | Y                             | N                                                 |                                | N                                                 |                                | N                                                 |
| CC2923      | TonB-dependent receptor                                                                |      | Y                        | N                             | N                                                 |                                | N                                                 |                                | N                                                 |
| CC2924      | Conserved hypothetical protein                                                         |      | Y                        | Y                             | N                                                 |                                | N                                                 |                                | N                                                 |
| CC2925      | Hypothetical protein                                                                   |      | Y                        | Y                             | N                                                 |                                | N                                                 |                                | N                                                 |
| CC2926      |                                                                                        |      | Y                        | Y                             | N                                                 |                                | N                                                 |                                | N                                                 |
| CC2927      | Transporter                                                                            |      | N                        | N                             | N                                                 |                                | N                                                 |                                | N                                                 |
| CC2928      | TonB-dependent receptor                                                                |      | Y                        | Y                             | N                                                 |                                | N                                                 |                                | N                                                 |
| CC2929      | Branched-chain amino acid aminotransferase                                             |      | Y                        | Y                             | N                                                 |                                | N                                                 |                                | N                                                 |
| CC2930      | Transcriptional regulator, MarR family                                                 |      | Y                        | Y                             | N                                                 |                                | N                                                 |                                | N                                                 |
| CC2931      | Two-component response regulator petR                                                  |      | Y                        | N                             | N                                                 |                                | N                                                 |                                | N                                                 |
| CC2932      | Two-component sensor histidine kinase                                                  |      | Y                        | Y                             | N                                                 |                                | N                                                 |                                | N                                                 |
| CC2933      | Prephenate dehydratase<br>3-deoxy-manno-octulosonate<br>cytidyltransferase             |      | Y                        | Y                             | N                                                 |                                | N                                                 |                                | N                                                 |
| CC2934      |                                                                                        |      | Y                        | Y                             | N                                                 |                                | N                                                 |                                | N                                                 |
| CC2935      | Cytochrome c<br>Gamma-D-glutamyl-meso-diaminopimelate<br>peptidase                     |      | N                        | N                             | N                                                 |                                | N                                                 |                                | N                                                 |
| CC2936      |                                                                                        |      | Y                        | N                             | N                                                 |                                | N                                                 |                                | N                                                 |
| CC2937      | Cytosol aminopeptidase                                                                 |      | N                        | N                             | N                                                 |                                | N                                                 |                                | N                                                 |
| CC2938      | Tetratricopeptide repeat family protein                                                |      | Y                        | N                             | N                                                 |                                | N                                                 |                                | N                                                 |
| CC2939      | Hypothetical protein                                                                   |      | Y                        | Y                             | N                                                 |                                | N                                                 |                                | N                                                 |
| CC2940      | Tyrosine phenol-lyase                                                                  |      | Y                        | Y                             | N                                                 |                                | N                                                 |                                | N                                                 |
| CC2941      | TadB-related pilus assembly protein                                                    |      | N                        | N                             | N                                                 |                                | N                                                 |                                | N                                                 |
| CC2942      | Pilus assembly ATPase CpaF                                                             | cpaF | Y                        | Y                             | N                                                 |                                | Y                                                 | Pole                           | N                                                 |
| CC2943      | Pilus assembly ATPase cpaE                                                             | cpaE | Y                        | N                             | N                                                 |                                | N                                                 |                                | N                                                 |
| CC2944      | Pilus assembly protein CpaD<br>Outer membrane pilus secretion channel                  | cpaD | Y                        | Y                             | Y                                                 | Pole                           | N                                                 |                                | N                                                 |
| CC2945      | cpaC                                                                                   | cpaC | Y                        | Y                             | N                                                 |                                | N                                                 |                                | N                                                 |
| CC2946      | Pilus assembly protein CpaB                                                            | cpaB | Y                        | Y                             | Y                                                 | Patchy/Spotty                  | N                                                 |                                | N                                                 |
| CC2947      | Pilus assembly prepilin peptidase CpaA                                                 | cpaA | Y                        | Y                             | N                                                 |                                | N                                                 |                                | N                                                 |
| CC2948      | Type IV pilin protein pilA                                                             | pilA | Y                        | N                             | N                                                 |                                | N                                                 |                                | N                                                 |
| CC2949      | CpaC-related secretion pathway protein                                                 |      | N                        | N                             | N                                                 |                                | N                                                 |                                | N                                                 |

| Gene Number | Annotation                                                       | Gene   | Entry Vector Constructed | Entry Vector Sequence Correct | Localized and Sequence-verified C-terminal Fusion | Localization w/ C-terminal Tag | Localized and Sequence-verified N-terminal Fusion | Localization w/ N-terminal Tag | Protein Localized as Both N- or C-terminal Fusion |
|-------------|------------------------------------------------------------------|--------|--------------------------|-------------------------------|---------------------------------------------------|--------------------------------|---------------------------------------------------|--------------------------------|---------------------------------------------------|
| CC2950      | TadG-related pilus assembly protein                              |        | Y                        | Y                             | N                                                 |                                | N                                                 |                                | N                                                 |
| CC2951      | TadE-related pilus assembly protein                              |        | Y                        | Y                             | N                                                 |                                | N                                                 |                                | N                                                 |
| CC2952      | 4-amino-4-deoxychorismate lyase                                  |        | Y                        | N                             | N                                                 |                                | N                                                 |                                | N                                                 |
| CC2953      | Para-aminobenzoate synthetase component I                        |        | Y                        | N                             | N                                                 |                                | N                                                 |                                | N                                                 |
| CC2954      | Transporter, MFS superfamily                                     |        | N                        | N                             | N                                                 |                                | N                                                 |                                | N                                                 |
| CC2955      | Protein tyrosine phosphatase                                     |        | Y                        | N                             | N                                                 |                                | N                                                 |                                | N                                                 |
| CC2956      | hypothetical protein                                             |        | Y                        | N                             | N                                                 |                                | N                                                 |                                | N                                                 |
| CC2957      | Acyltransferase                                                  |        | N                        | N                             | N                                                 |                                | N                                                 |                                | N                                                 |
| CC2958      | Dioxygenase                                                      |        | Y                        | Y                             | N                                                 |                                | N                                                 |                                | N                                                 |
| CC2959      | Transcriptional regulator, AraC family                           |        | N                        | N                             | N                                                 |                                | N                                                 |                                | N                                                 |
| CC2960      | Transcriptional regulator, AraC family                           |        | N                        | N                             | N                                                 |                                | N                                                 |                                | N                                                 |
| CC2961      | Hypothetical cytosolic protein                                   |        | Y                        | Y                             | N                                                 |                                | N                                                 |                                | N                                                 |
| CC2962      | Glyoxalase family protein                                        |        | Y                        | Y                             | N                                                 |                                | N                                                 |                                | N                                                 |
| CC2963      | Carbon-nitrogen hydrolase                                        |        | Y                        | Y                             | N                                                 |                                | N                                                 |                                | N                                                 |
| CC2964      | Hypothetical membrane spanning protein                           |        | N                        | N                             | N                                                 |                                | N                                                 |                                | N                                                 |
| CC2965      | Conserved hypothetical protein                                   |        | Y                        | Y                             | N                                                 |                                | N                                                 |                                | N                                                 |
| CC2966      | 3-oxoacyl-[acyl-carrier protein] reductase                       |        | Y                        | Y                             | N                                                 |                                | N                                                 |                                | N                                                 |
| CC2967      | Cell wall hydrolase family protein                               |        | Y                        | Y                             | N                                                 |                                | N                                                 |                                | N                                                 |
| CC2968      | Conserved hypothetical protein                                   |        | Y                        | Y                             | N                                                 |                                | N                                                 |                                | N                                                 |
| CC2969      | Transcriptional regulator, PadR family                           |        | Y                        | Y                             | N                                                 |                                | N                                                 |                                | N                                                 |
| CC2970      | Cytochrome c family protein                                      |        | Y                        | Y                             | N                                                 |                                | N                                                 |                                | N                                                 |
| CC2971      | GAF/PAS-family sensor histidine kinase                           |        | Y                        | Y                             | Y                                                 | Central - Focus                | N                                                 |                                | N                                                 |
| CC2972      | Transcriptional regulator, MarR family                           |        | Y                        | Y                             | N                                                 |                                | N                                                 |                                | N                                                 |
| CC2973      | Glutathione S-transferase                                        |        | Y                        | Y                             | N                                                 |                                | N                                                 |                                | N                                                 |
| CC2974      | Hypothetical protein                                             |        | Y                        | Y                             | N                                                 |                                | N                                                 |                                | N                                                 |
| CC2975      | 4-oxalocrotonate tautomerase                                     |        | Y                        | Y                             | N                                                 |                                | N                                                 |                                | N                                                 |
| CC2976      | Flagellin                                                        |        | Y                        | Y                             | N                                                 |                                | N                                                 |                                | N                                                 |
| CC2977      | Hypothetical transcriptional regulatory protein                  |        | Y                        | N                             | N                                                 |                                | N                                                 |                                | N                                                 |
| CC2978      | Hypothetical protein                                             |        | Y                        | Y                             | N                                                 |                                | N                                                 |                                | N                                                 |
| CC2979      | C factor cell-cell signaling protein                             |        | Y                        | Y                             | N                                                 |                                | N                                                 |                                | N                                                 |
| CC2980      | Hypothetical protein                                             |        | Y                        | Y                             | N                                                 |                                | Y                                                 | Middle OR Pole                 | N                                                 |
| CC2981      | Excinuclease ABC subunit B                                       |        | Y                        | N                             | N                                                 |                                | N                                                 |                                | N                                                 |
| CC2982      | Hypothetical protein                                             |        | N                        | N                             | N                                                 |                                | N                                                 |                                | N                                                 |
| CC2983      | Hypothetical protein                                             |        | Y                        | Y                             | N                                                 |                                | N                                                 |                                | N                                                 |
| CC2984      | toxin protein parE-4                                             | parE-4 | Y                        | Y                             | N                                                 |                                | N                                                 |                                | N                                                 |
| CC2985      | antitoxin protein parD-4                                         | parD_4 | Y                        | Y                             | N                                                 |                                | N                                                 |                                | N                                                 |
| CC2986      | Hypothetical protein                                             |        | Y                        | Y                             | N                                                 |                                | N                                                 |                                | N                                                 |
| CC2987      |                                                                  |        | Y                        | Y                             | N                                                 |                                | N                                                 |                                | N                                                 |
| CC2988      | hybrid sensor histidine kinase/receiver domain protein           |        | Y                        | Y                             | Y                                                 | Patchy/Spotty                  | N                                                 |                                | N                                                 |
| CC2989      | Hypothetical protein                                             |        | Y                        | Y                             | N                                                 |                                | N                                                 |                                | N                                                 |
| CC2990      | Nitropropane dioxygenase / Trans-enoyl-CoA reductase family      |        | Y                        | Y                             | N                                                 |                                | N                                                 |                                | N                                                 |
| CC2991      | Hypothetical exported protein                                    |        | Y                        | Y                             | N                                                 |                                | N                                                 |                                | N                                                 |
| CC2992      | H-NOX family heme binding protein                                |        | Y                        | Y                             | N                                                 |                                | N                                                 |                                | N                                                 |
| CC2993      | Two-component sensor histidine kinase                            |        | Y                        | Y                             | N                                                 |                                | N                                                 |                                | N                                                 |
| CC2994      | Hypothetical protein                                             |        | Y                        | Y                             | Y                                                 | Patchy/Spotty                  | N                                                 |                                | N                                                 |
| CC2995      | Acetyl-coenzyme A carboxylase carboxyl transferase subunit alpha |        | N                        | N                             | N                                                 |                                | N                                                 |                                | N                                                 |
| CC2996      | Hypothetical protein                                             |        | Y                        | Y                             | N                                                 |                                | N                                                 |                                | N                                                 |
| CC2997      | CYTOCHROME P450 IVA5                                             |        | Y                        | Y                             | N                                                 |                                | N                                                 |                                | N                                                 |
| CC2998      | OsmC-like protein                                                |        | Y                        | Y                             | N                                                 |                                | N                                                 |                                | N                                                 |
| CC2999      | MalyI-CoA lyase                                                  |        | Y                        | Y                             | N                                                 |                                | Y                                                 | Middle OR Pole                 | N                                                 |



| Gene Number | Annotation                                                  | Gene | Entry Vector Constructed | Entry Vector Sequence Correct | Localized and Sequence-verified C-terminal Fusion | Localization w/ C-terminal Tag | Localized and Sequence-verified N-terminal Fusion | Localization w/ N-terminal Tag | Protein Localized as Both N- or C-terminal Fusion |
|-------------|-------------------------------------------------------------|------|--------------------------|-------------------------------|---------------------------------------------------|--------------------------------|---------------------------------------------------|--------------------------------|---------------------------------------------------|
| CC3000      | Mechanosensitive ion channel                                |      | Y                        | N                             | N                                                 |                                | N                                                 |                                | N                                                 |
| CC3001      | TonB-dependent receptor                                     |      | N                        | N                             | N                                                 |                                | N                                                 |                                | N                                                 |
| CC3002      | Aldo/keto reductase family protein                          |      | Y                        | Y                             | N                                                 |                                | N                                                 |                                | N                                                 |
| CC3003      | Conserved hypothetical protein                              |      | N                        | N                             | N                                                 |                                | N                                                 |                                | N                                                 |
| CC3004      | Hypothetical protein                                        |      | Y                        | Y                             | N                                                 |                                | N                                                 |                                | N                                                 |
| CC3005      | PhnA protein                                                |      | N                        | N                             | N                                                 |                                | N                                                 |                                | N                                                 |
| CC3006      | Integrase/recombinase (XerD/RipX family)                    |      | Y                        | N                             | N                                                 |                                | N                                                 |                                | N                                                 |
| CC3007      | Hypothetical protein                                        |      | Y                        | Y                             | N                                                 |                                | N                                                 |                                | N                                                 |
| CC3008      | Shikimate kinase                                            |      | Y                        | Y                             | N                                                 |                                | N                                                 |                                | N                                                 |
| CC3009      | 3-dehydroquinate synthase                                   |      | Y                        | Y                             | N                                                 |                                | N                                                 |                                | N                                                 |
| CC3010      | Molecular chaperones (DnaJ family)                          |      | Y                        | Y                             | N                                                 |                                | N                                                 |                                | N                                                 |
| CC3011      | BolA protein                                                |      | Y                        | Y                             | N                                                 |                                | N                                                 |                                | N                                                 |
| CC3012      | Cytidine deaminase                                          |      | Y                        | Y                             | N                                                 |                                | N                                                 |                                | N                                                 |
| CC3013      | TonB-dependent outer membrane receptor                      |      | Y                        | Y                             | N                                                 |                                | N                                                 |                                | N                                                 |
| CC3014      | Hypothetical protein                                        |      | Y                        | Y                             | N                                                 |                                | N                                                 |                                | N                                                 |
| CC3015      | Two-component receiver domain protein                       |      | Y                        | Y                             | N                                                 |                                | N                                                 |                                | N                                                 |
| CC3016      | Hypothetical protein                                        |      | Y                        | Y                             | Y                                                 | Middle OR Pole                 | N                                                 |                                | N                                                 |
| CC3017      | Magnesium and cobalt efflux protein corB                    |      | Y                        | Y                             | N                                                 |                                | N                                                 |                                | N                                                 |
| CC3018      |                                                             |      | Y                        | Y                             | N                                                 |                                | Y                                                 | Patchy/Spotty                  | N                                                 |
| CC3019      | Membrane-associated phospholipid phosphatase                |      | Y                        | Y                             | N                                                 |                                | N                                                 |                                | N                                                 |
| CC3020      | Hypothetical protein                                        |      | Y                        | Y                             | N                                                 |                                | N                                                 |                                | N                                                 |
| CC3021      | Cobaltochelata cobS subunit                                 |      | Y                        | Y                             | N                                                 |                                | N                                                 |                                | N                                                 |
| CC3022      | Hypothetical cytosolic protein                              |      | Y                        | Y                             | Y                                                 | Stalk                          | Y                                                 | Pole                           | Y                                                 |
| CC3023      | Hypothetical protein                                        |      | Y                        | Y                             | N                                                 |                                | N                                                 |                                | N                                                 |
| CC3024      | Hypothetical protein                                        |      | Y                        | Y                             | N                                                 |                                | N                                                 |                                | N                                                 |
| CC3025      | Chemotaxis protein cheW                                     |      | Y                        | Y                             | N                                                 |                                | Y                                                 | Varied Focus                   | N                                                 |
| CC3026      | Hypothetical protein                                        |      | Y                        | Y                             | N                                                 |                                | N                                                 |                                | N                                                 |
| CC3027      | Conserved membrane spanning protein                         |      | Y                        | Y                             | N                                                 |                                | N                                                 |                                | N                                                 |
| CC3028      | Transcriptional regulator, ArsR family                      |      | Y                        | Y                             | N                                                 |                                | N                                                 |                                | N                                                 |
| CC3029      | NAD/MYCOTHOL-DEPENDENT FORMALDEHYDE DEHYDROGENASE           |      | Y                        | Y                             | N                                                 |                                | N                                                 |                                | N                                                 |
| CC3030      | Melibiose carrier protein                                   |      | Y                        | N                             | N                                                 |                                | N                                                 |                                | N                                                 |
| CC3031      | Non-hemolytic phospholipase C                               |      | Y                        | Y                             | N                                                 |                                | N                                                 |                                | N                                                 |
| CC3032      | Aminoacyl-histidine dipeptidase                             |      | N                        | N                             | N                                                 |                                | N                                                 |                                | N                                                 |
| CC3033      | Transporter, drug/metabolite exporter family                |      | Y                        | Y                             | N                                                 |                                | N                                                 |                                | N                                                 |
| CC3034      | Peptidoglycan-specific endopeptidase, M23 family            |      | Y                        | Y                             | N                                                 |                                | N                                                 |                                | N                                                 |
| CC3035      | Cell cycle response regulator ctrA                          | ctrA | Y                        | Y                             | N                                                 |                                | Y                                                 | Pole                           | N                                                 |
| CC3036      | LytR/AlgR-family transcriptional regulator                  |      | N                        | N                             | N                                                 |                                | N                                                 |                                | N                                                 |
| CC3037      | Predicted transcriptional regulator, antitoxin protein higA | higA | Y                        | N                             | N                                                 |                                | N                                                 |                                | N                                                 |
| CC3038      | toxin protein higB                                          | higB | Y                        | Y                             | N                                                 |                                | N                                                 |                                | N                                                 |
| CC3039      | Predicted diene lactone hydrolase                           |      | Y                        | Y                             | N                                                 |                                | N                                                 |                                | N                                                 |
| CC3040      | Flagellum-specific ATP synthase fliL                        | fliL | Y                        | Y                             | N                                                 |                                | N                                                 |                                | N                                                 |
| CC3041      | Flagellar export protein FliJ                               | fliJ | Y                        | N                             | N                                                 |                                | N                                                 |                                | N                                                 |
| CC3042      | Endo-1,4-beta-xylanase                                      |      | Y                        | Y                             | N                                                 |                                | N                                                 |                                | N                                                 |
| CC3043      | Peroxidase / Catalase katG                                  |      | Y                        | N                             | N                                                 |                                | N                                                 |                                | N                                                 |
| CC3044      | Dihydroxy-acid dehydratase                                  |      | Y                        | Y                             | N                                                 |                                | N                                                 |                                | N                                                 |
| CC3045      | Transcriptional regulators, LysR family                     |      | Y                        | N                             | N                                                 |                                | N                                                 |                                | N                                                 |
| CC3046      | Phosphoserine phosphatase                                   |      | Y                        | Y                             | N                                                 |                                | N                                                 |                                | N                                                 |
| CC3047      | RNA polymerase sigma factor rpoD                            |      | Y                        | Y                             | N                                                 |                                | N                                                 |                                | N                                                 |
| CC3048      | PAS-family sensor histidine kinase                          |      | Y                        | Y                             | N                                                 |                                | N                                                 |                                | N                                                 |

| Gene Number | Annotation                                                   | Gene | Entry Vector Constructed | Entry Vector Sequence Correct | Localized and Sequence-verified C-terminal Fusion | Localization w/ C-terminal Tag | Localized and Sequence-verified N-terminal Fusion | Localization w/ N-terminal Tag | Protein Localized as Both N- or C-terminal Fusion |
|-------------|--------------------------------------------------------------|------|--------------------------|-------------------------------|---------------------------------------------------|--------------------------------|---------------------------------------------------|--------------------------------|---------------------------------------------------|
| CC3049      | DNA primase                                                  | dnaG | Y                        | Y                             | N                                                 |                                | N                                                 |                                | N                                                 |
| CC3050      | hypothetical protein                                         |      | Y                        | Y                             | N                                                 |                                | N                                                 |                                | N                                                 |
| CC3051      | M61 glycyI aminopeptidase                                    |      | Y                        | Y                             | Y                                                 | Middle OR Pole                 | N                                                 |                                | N                                                 |
| CC3052      | Hypothetical protein                                         |      | Y                        | Y                             | N                                                 |                                | N                                                 |                                | N                                                 |
| CC3053      | Hypothetical cytosolic protein                               |      | N                        | N                             | N                                                 |                                | N                                                 |                                | N                                                 |
| CC3054      | Beta-glucosidase / Beta-xylosidase                           |      | Y                        | Y                             | N                                                 |                                | N                                                 |                                | N                                                 |
| CC3055      | Hypothetical protein                                         |      | Y                        | N                             | N                                                 |                                | N                                                 |                                | N                                                 |
| CC3056      | Hypothetical protein                                         |      | Y                        | N                             | N                                                 |                                | N                                                 |                                | N                                                 |
| CC3057      | Hypothetical protein                                         |      | Y                        | N                             | N                                                 |                                | N                                                 |                                | N                                                 |
| CC3058      | PAS-family sensor histidine kinase/receiver protein          |      | Y                        | N                             | N                                                 |                                | N                                                 |                                | N                                                 |
| CC3059      | Transporter                                                  |      | Y                        | Y                             | N                                                 |                                | N                                                 |                                | N                                                 |
| CC3060      | Hypothetical periplasmic protein                             |      | N                        | N                             | N                                                 |                                | N                                                 |                                | N                                                 |
| CC3061      | Hypothetical membrane spanning protein                       |      | Y                        | Y                             | N                                                 |                                | N                                                 |                                | N                                                 |
| CC3062      | Iron-sulfur cluster assembly/repair protein                  |      |                          |                               |                                                   |                                |                                                   |                                |                                                   |
| CC3062      | ApbE                                                         |      | Y                        | Y                             | N                                                 |                                | N                                                 |                                | N                                                 |
| CC3063      | Sulfite reductase [NADPH] flavoprotein alpha-component       |      | Y                        | Y                             | N                                                 |                                | N                                                 |                                | N                                                 |
| CC3064      | Molybdopterin-guanine dinucleotide biosynthesis protein A    |      | N                        | N                             | N                                                 |                                | N                                                 |                                | N                                                 |
| CC3065      | transcriptional regulator xylR                               |      | Y                        | Y                             | N                                                 |                                | Y                                                 | MidBand                        | N                                                 |
| CC3066      | Glutamate N-acetyltransferase / Amino-acid acetyltransferase |      | Y                        | Y                             | N                                                 |                                | N                                                 |                                | N                                                 |
| CC3067      | Peptidyl-prolyl cis-trans isomerase                          |      | N                        | N                             | N                                                 |                                | N                                                 |                                | N                                                 |
| CC3068      | Protein translocase subunit secA                             |      | Y                        | Y                             | N                                                 |                                | N                                                 |                                | N                                                 |
| CC3069      | Methylenomycin A resistance protein                          |      | Y                        | Y                             | N                                                 |                                | N                                                 |                                | N                                                 |
| CC3070      | Transcriptional regulator, ArsR family                       |      | Y                        | Y                             | N                                                 |                                | N                                                 |                                | N                                                 |
| CC3071      | Hypothetical protein                                         |      | Y                        | Y                             | N                                                 |                                | N                                                 |                                | N                                                 |
| CC3072      | Hypothetical protein                                         |      | Y                        | Y                             | N                                                 |                                | N                                                 |                                | N                                                 |
| CC3073      | Conserved hypothetical protein                               |      | Y                        | Y                             | N                                                 |                                | N                                                 |                                | N                                                 |
| CC3074      | Conserved hypothetical protein                               |      | Y                        | Y                             | N                                                 |                                | N                                                 |                                | N                                                 |
| CC3075      | hybrid sensor histidine kinase/receiver domain protein       |      | Y                        | Y                             | N                                                 |                                | N                                                 |                                | N                                                 |
| CC3076      | 3-oxoacyl-[acyl-carrier protein] reductase                   |      | Y                        | Y                             | N                                                 |                                | N                                                 |                                | N                                                 |
| CC3077      | Hypothetical cytosolic protein                               |      | Y                        | Y                             | N                                                 |                                | N                                                 |                                | N                                                 |
| CC3078      | Permease                                                     |      | Y                        | Y                             | N                                                 |                                | N                                                 |                                | N                                                 |
| CC3079      | Hypothetical cytosolic protein                               |      | Y                        | Y                             | N                                                 |                                | N                                                 |                                | N                                                 |
| CC3080      | Nucleotidyltransferase                                       |      | N                        | N                             | N                                                 |                                | N                                                 |                                | N                                                 |
| CC3081      | Methylmalonyl-CoA mutase homolog MeaA                        |      | Y                        | Y                             | N                                                 |                                | N                                                 |                                | N                                                 |
| CC3082      | Transcriptional regulator, MerR family                       |      | Y                        | Y                             | Y                                                 | Patchy/Spotty                  | N                                                 |                                | N                                                 |
| CC3083      | NADH-dependent flavin oxidoreductase                         |      | N                        | N                             | N                                                 |                                | N                                                 |                                | N                                                 |
| CC3084      | enoyl-CoA hydratase/isomerase                                |      | Y                        | Y                             | N                                                 |                                | N                                                 |                                | N                                                 |
| CC3085      | Alcohol dehydrogenase                                        |      | Y                        | Y                             | N                                                 |                                | N                                                 |                                | N                                                 |
| CC3086      | Beta-lactamase family protein                                |      | N                        | N                             | N                                                 |                                | N                                                 |                                | N                                                 |
| CC3087      | Acyl-CoA dehydrogenase                                       |      | Y                        | Y                             | N                                                 |                                | N                                                 |                                | N                                                 |
| CC3088      | Glutathione S-transferase                                    |      | Y                        | Y                             | N                                                 |                                | N                                                 |                                | N                                                 |
| CC3089      | Conserved hypothetical protein                               |      | Y                        | Y                             | N                                                 |                                | Y                                                 | Middle OR Pole                 | N                                                 |
| CC3090      | Cysteine/acetylserine efflux protein                         |      | N                        | N                             | N                                                 |                                | N                                                 |                                | N                                                 |
| CC3091      | Epoxide hydrolase                                            |      | Y                        | Y                             | N                                                 |                                | N                                                 |                                | N                                                 |
| CC3092      | Hypothetical protein                                         |      | Y                        | Y                             | N                                                 |                                | N                                                 |                                | N                                                 |
| CC3093      | Low-specificity L-threonine aldolase                         |      | N                        | N                             | N                                                 |                                | N                                                 |                                | N                                                 |
| CC3094      | Sensory box/GGDEF family protein                             |      | Y                        | N                             | N                                                 |                                | N                                                 |                                | N                                                 |
| CC3095      | Transposase                                                  |      | Y                        | Y                             | N                                                 |                                | N                                                 |                                | N                                                 |

| Gene Number | Annotation                                                                            | Gene   | Entry Vector Constructed | Entry Vector Sequence Correct | Localized and Sequence-verified C-terminal Fusion | Localization w/ C-terminal Tag | Localized and Sequence-verified N-terminal Fusion | Localization w/ N-terminal Tag | Protein Localized as Both N- or C-terminal Fusion |
|-------------|---------------------------------------------------------------------------------------|--------|--------------------------|-------------------------------|---------------------------------------------------|--------------------------------|---------------------------------------------------|--------------------------------|---------------------------------------------------|
| CC3096      | Lactoylglutathione lyase                                                              |        | Y                        | Y                             | N                                                 |                                | N                                                 |                                | N                                                 |
| CC3097      | Integral membrane protein                                                             |        | Y                        | Y                             | N                                                 |                                | N                                                 |                                | N                                                 |
| CC3098      | RNA polymerase sigma-32 factor                                                        |        | Y                        | Y                             | N                                                 |                                | N                                                 |                                | N                                                 |
| CC3099      | Alpha/beta hydrolase family protein                                                   |        | Y                        | Y                             | N                                                 |                                | N                                                 |                                | N                                                 |
| CC3100      | Two-component response regulator                                                      |        | N                        | N                             | N                                                 |                                | N                                                 |                                | N                                                 |
| CC3101      | Conserved hypothetical protein hybrid sensor histidine kinase/receiver domain protein |        | Y                        | Y                             | N                                                 |                                | N                                                 |                                | N                                                 |
| CC3102      | Adenylosuccinate synthetase                                                           |        | Y                        | Y                             | N                                                 |                                | N                                                 |                                | N                                                 |
| CC3103      | Conserved hypothetical protein                                                        |        | N                        | N                             | N                                                 |                                | N                                                 |                                | N                                                 |
| CC3104      | Conserved hypothetical protein                                                        |        | Y                        | Y                             | N                                                 |                                | N                                                 |                                | N                                                 |
| CC3105      | Threo-3-hydroxyaspartate ammonia-lyase                                                |        | Y                        | Y                             | N                                                 |                                | N                                                 |                                | N                                                 |
| CC3106      | Alanine racemase                                                                      |        | N                        | N                             | N                                                 |                                | N                                                 |                                | N                                                 |
| CC3107      | Aminopeptidase                                                                        |        | Y                        | Y                             | N                                                 |                                | N                                                 |                                | N                                                 |
| CC3108      | L-serine dehydratase                                                                  |        | Y                        | Y                             | N                                                 |                                | N                                                 |                                | N                                                 |
| CC3109      | Hypothetical protein                                                                  |        | Y                        | Y                             | N                                                 |                                | N                                                 |                                | N                                                 |
| CC3110      | Hypothetical membrane spanning protein                                                |        | Y                        | Y                             | N                                                 |                                | N                                                 |                                | N                                                 |
| CC3111      | Acetyl-coenzyme A synthetase                                                          |        | Y                        | Y                             | N                                                 |                                | N                                                 |                                | N                                                 |
| CC3112      | Transcriptional regulator, MarR family                                                |        | N                        | N                             | N                                                 |                                | N                                                 |                                | N                                                 |
| CC3113      | L-Ala-D/L-Glu racemase                                                                |        | N                        | N                             | N                                                 |                                | N                                                 |                                | N                                                 |
| CC3114      | Hypothetical protein                                                                  |        | Y                        | Y                             | N                                                 |                                | N                                                 |                                | N                                                 |
| CC3115      | Conserved hypothetical protein, putative zinc finger                                  |        | Y                        | Y                             | N                                                 |                                | N                                                 |                                | N                                                 |
| CC3116      | ARO8 family aminotransferase/HTH DNA-binding protein                                  |        | N                        | N                             | N                                                 |                                | N                                                 |                                | N                                                 |
| CC3117      | Hypothetical protein                                                                  |        | Y                        | Y                             | N                                                 |                                | N                                                 |                                | N                                                 |
| CC3118      | Transcriptional regulator, TetR family                                                |        | Y                        | Y                             | N                                                 |                                | N                                                 |                                | N                                                 |
| CC3119      | Periplasmic multidrug efflux lipoprotein precursor                                    |        | Y                        | Y                             | N                                                 |                                | N                                                 |                                | N                                                 |
| CC3120      | Cation/multidrug efflux pump acrB5                                                    | acrB5  | Y                        | N                             | N                                                 |                                | N                                                 |                                | N                                                 |
| CC3121      | Phytoene dehydrogenase                                                                |        | Y                        | Y                             | N                                                 |                                | N                                                 |                                | N                                                 |
| CC3122      | Ring hydroxylating dioxygenase, alpha-subunit                                         |        | Y                        | Y                             | N                                                 |                                | N                                                 |                                | N                                                 |
| CC3123      | Transcriptional regulator, TetR family                                                |        | N                        | N                             | N                                                 |                                | N                                                 |                                | N                                                 |
| CC3124      | Hypothetical protein                                                                  |        | Y                        | Y                             | Y                                                 | Pole                           | N                                                 |                                | N                                                 |
| CC3125      | Parathion hydrolase                                                                   |        | N                        | N                             | N                                                 |                                | N                                                 |                                | N                                                 |
| CC3126      | Putative arginine/agmatin antiporter                                                  |        | Y                        | Y                             | Y                                                 | Patchy/Spotty                  | N                                                 |                                | N                                                 |
| CC3127      | TonB-dependent receptor                                                               |        | N                        | N                             | N                                                 |                                | N                                                 |                                | N                                                 |
| CC3128      | Tetratricopeptide repeat family protein                                               |        | Y                        | N                             | N                                                 |                                | N                                                 |                                | N                                                 |
| CC3129      | FAD dependent oxidoreductase                                                          |        | Y                        | Y                             | N                                                 |                                | N                                                 |                                | N                                                 |
| CC3130      | Glutamine synthetase                                                                  |        | Y                        | Y                             | N                                                 |                                | N                                                 |                                | N                                                 |
| CC3131      | toxin protein relE-4                                                                  | relE-4 | Y                        | Y                             | N                                                 |                                | N                                                 |                                | N                                                 |
| CC3132      | Gamma-aminobutyrate aminotransferase                                                  |        | Y                        | Y                             | N                                                 |                                | N                                                 |                                | N                                                 |
| CC3133      | Glutamine amidotransferase, class I                                                   |        | N                        | N                             | N                                                 |                                | N                                                 |                                | N                                                 |
| CC3134      | Spermidine/putrescine transport ATP-binding protein potA                              |        | N                        | N                             | N                                                 |                                | N                                                 |                                | N                                                 |
| CC3135      | Spermidine/putrescine transport system permease protein potC                          |        | Y                        | Y                             | N                                                 |                                | N                                                 |                                | N                                                 |
| CC3136      | Transporter                                                                           |        | Y                        | Y                             | N                                                 |                                | N                                                 |                                | N                                                 |
| CC3137      | Spermidine/putrescine-binding protein                                                 |        | Y                        | Y                             | N                                                 |                                | N                                                 |                                | N                                                 |
| CC3138      | Glutamine synthetase                                                                  |        | Y                        | Y                             | N                                                 |                                | N                                                 |                                | N                                                 |
| CC3139      | Glutamate-1-semialdehyde 2,1-aminomutase                                              |        | Y                        | N                             | N                                                 |                                | N                                                 |                                | N                                                 |
| CC3140      | Succinate-semialdehyde dehydrogenase [NADP+]                                          |        | Y                        | Y                             | N                                                 |                                | N                                                 |                                | N                                                 |

| Gene Number | Annotation                                                      | Gene | Entry Vector Constructed | Entry Vector Sequence Correct | Localized and Sequence-verified C-terminal Fusion | Localization w/ C-terminal Tag | Localized and Sequence-verified N-terminal Fusion | Localization w/ N-terminal Tag | Protein Localized as Both N- or C-terminal Fusion |
|-------------|-----------------------------------------------------------------|------|--------------------------|-------------------------------|---------------------------------------------------|--------------------------------|---------------------------------------------------|--------------------------------|---------------------------------------------------|
| CC3141      | Aldehyde dehydrogenase                                          |      | Y                        | Y                             | N                                                 |                                | N                                                 |                                | N                                                 |
| CC3142      | Transcriptional regulator                                       |      | Y                        | Y                             | N                                                 |                                | Y                                                 | Middle OR Pole                 | N                                                 |
| CC3143      | Omega-amino acid-pyruvate aminotransferase                      |      | Y                        | Y                             | N                                                 |                                | N                                                 |                                | N                                                 |
| CC3144      | Hypothetical protein                                            |      | Y                        | Y                             | N                                                 |                                | N                                                 |                                | N                                                 |
| CC3145      | Methyl-accepting chemotaxis protein                             |      | Y                        | Y                             | N                                                 |                                | Y                                                 | Pole                           | N                                                 |
| CC3146      | TonB-dependent receptor                                         |      | Y                        | Y                             | N                                                 |                                | N                                                 |                                | N                                                 |
| CC3147      | TonB-dependent receptor                                         |      | Y                        | Y                             | N                                                 |                                | N                                                 |                                | N                                                 |
| CC3148      | EAL-domain diguanylate phosphodiesterase                        |      | Y                        | Y                             | N                                                 |                                | N                                                 |                                | N                                                 |
| CC3149      | Hypothetical protein                                            |      | N                        | N                             | N                                                 |                                | N                                                 |                                | N                                                 |
| CC3150      | Hypothetical transcriptional regulatory protein                 |      | Y                        | Y                             | N                                                 |                                | N                                                 |                                | N                                                 |
| CC3151      | Conserved hypothetical protein                                  |      | Y                        | Y                             | N                                                 |                                | N                                                 |                                | N                                                 |
| CC3152      | pectate lyase                                                   |      | Y                        | Y                             | N                                                 |                                | N                                                 |                                | N                                                 |
| CC3153      | Conserved hypothetical protein                                  |      | Y                        | Y                             | N                                                 |                                | N                                                 |                                | N                                                 |
| CC3154      | Chorismate synthase                                             |      | Y                        | Y                             | N                                                 |                                | N                                                 |                                | N                                                 |
| CC3155      | Chemotaxis receiver domain protein cheYIII                      |      | Y                        | Y                             | Y                                                 | Pole                           | N                                                 |                                | N                                                 |
| CC3156      | Hypothetical protein                                            |      | Y                        | Y                             | N                                                 |                                | N                                                 |                                | N                                                 |
| CC3157      | Hypothetical cupin 2 domain containing protein                  |      | Y                        | Y                             | N                                                 |                                | N                                                 |                                | N                                                 |
| CC3158      | Queuosine biosynthesis protein queD                             |      | Y                        | Y                             | N                                                 |                                | N                                                 |                                | N                                                 |
| CC3159      | Queuosine biosynthesis protein QueE                             |      | Y                        | Y                             | N                                                 |                                | N                                                 |                                | N                                                 |
| CC3160      | Queuosine biosynthesis protein QueC                             |      | Y                        | Y                             | N                                                 |                                | N                                                 |                                | N                                                 |
| CC3161      | TonB-dependent receptor                                         |      | N                        | N                             | N                                                 |                                | N                                                 |                                | N                                                 |
| CC3162      | CBS pair-family sensor histidine kinase/receiver domain protein |      | N                        | N                             | N                                                 |                                | N                                                 |                                | N                                                 |
| CC3163      | Hypothetical protein                                            |      | Y                        | Y                             | N                                                 |                                | N                                                 |                                | N                                                 |
| CC3164      | Hypothetical transcriptional regulatory protein                 |      | Y                        | Y                             | N                                                 |                                | N                                                 |                                | N                                                 |
| CC3165      | diguanylate receptor protein dgrB                               |      | Y                        | Y                             | N                                                 |                                | N                                                 |                                | N                                                 |
| CC3166      |                                                                 |      | Y                        | Y                             | N                                                 |                                | N                                                 |                                | N                                                 |
| CC3167      | Glucokinase                                                     |      | N                        | N                             | N                                                 |                                | N                                                 |                                | N                                                 |
| CC3168      | Methionine gamma-lyase                                          |      | N                        | N                             | N                                                 |                                | N                                                 |                                | N                                                 |
| CC3169      | Transcriptional regulator, AsnC family                          |      | Y                        | Y                             | N                                                 |                                | N                                                 |                                | N                                                 |
| CC3170      | Two-component sensor histidine kinase                           |      | Y                        | Y                             | N                                                 |                                | N                                                 |                                | N                                                 |
| CC3171      | Hypothetical protein                                            |      | Y                        | Y                             | N                                                 |                                | N                                                 |                                | N                                                 |
| CC3172      | Glycerophosphoryl diester phosphodiesterase                     |      | Y                        | Y                             | N                                                 |                                | N                                                 |                                | N                                                 |
| CC3173      | Glycosyltransferase                                             |      | Y                        | Y                             | N                                                 |                                | N                                                 |                                | N                                                 |
| CC3174      | Aminobutyraldehyde dehydrogenase                                |      | Y                        | Y                             | N                                                 |                                | N                                                 |                                | N                                                 |
| CC3175      | Short chain dehydrogenase                                       |      | Y                        | Y                             | N                                                 |                                | N                                                 |                                | N                                                 |
| CC3176      | Pyruvate ferredoxin/flavodoxin oxidoreductase family protein    |      | N                        | N                             | N                                                 |                                | N                                                 |                                | N                                                 |
| CC3177      | Transcriptional regulator, AsnC family                          |      | Y                        | Y                             | Y                                                 | Pole                           | N                                                 |                                | N                                                 |
| CC3178      | Pirin                                                           |      | Y                        | Y                             | N                                                 |                                | N                                                 |                                | N                                                 |
| CC3179      | Putative metal-dependent hydrolase                              |      | Y                        | Y                             | N                                                 |                                | N                                                 |                                | N                                                 |
| CC3180      | Adenosine deaminase                                             |      | Y                        | Y                             | N                                                 |                                | N                                                 |                                | N                                                 |
| CC3181      | Magnesium and cobalt transport protein corA                     |      | Y                        | Y                             | N                                                 |                                | N                                                 |                                | N                                                 |
| CC3182      | Hypothetical transporter                                        |      | Y                        | Y                             | N                                                 |                                | N                                                 |                                | N                                                 |
| CC3183      | Hypothetical transcriptional regulatory protein                 |      | N                        | N                             | N                                                 |                                | N                                                 |                                | N                                                 |
| CC3184      | YcfA superfamily protein                                        |      | Y                        | Y                             | N                                                 |                                | Y                                                 | Middle OR Pole                 | N                                                 |
| CC3185      | Hypothetical protein                                            |      | Y                        | Y                             | N                                                 |                                | N                                                 |                                | N                                                 |
| CC3186      | Conserved hypothetical protein                                  |      | Y                        | Y                             | N                                                 |                                | N                                                 |                                | N                                                 |
| CC3187      | Conserved hypothetical protein                                  |      | N                        | N                             | N                                                 |                                | N                                                 |                                | N                                                 |
| CC3188      | Long-chain-fatty-acid-CoA ligase                                |      | Y                        | N                             | N                                                 |                                | N                                                 |                                | N                                                 |

| Gene Number | Annotation                                                                                                                               | Gene | Entry Vector Constructed | Entry Vector Sequence Correct | Localized and Sequence-verified C-terminal Fusion | Localization w/ C-terminal Tag | Localized and Sequence-verified N-terminal Fusion | Localization w/ N-terminal Tag | Protein Localized as Both N- or C-terminal Fusion |
|-------------|------------------------------------------------------------------------------------------------------------------------------------------|------|--------------------------|-------------------------------|---------------------------------------------------|--------------------------------|---------------------------------------------------|--------------------------------|---------------------------------------------------|
| CC3189      | Enoyl-CoA hydratase / Delta(3)-cis-delta(2)-trans-enoyl-CoA isomerase / 3-hydroxyacyl-CoA dehydrogenase / 3-hydroxybutyryl-CoA epimerase |      | Y                        | Y                             | N                                                 |                                | N                                                 |                                | N                                                 |
| CC3190      | Beta-lactamase family protein                                                                                                            |      | Y                        | Y                             | N                                                 |                                | Y                                                 | Patchy/Spotty                  | N                                                 |
| CC3191      | PAS-family sensor histidine kinase                                                                                                       |      | Y                        | Y                             | N                                                 |                                | N                                                 |                                | N                                                 |
| CC3192      | Transcriptional regulator, TetR family                                                                                                   |      | Y                        | Y                             | N                                                 |                                | N                                                 |                                | N                                                 |
| CC3193      | Conserved hypothetical protein                                                                                                           |      | Y                        | Y                             | N                                                 |                                | N                                                 |                                | N                                                 |
| CC3194      | TonB-dependent outer membrane receptor                                                                                                   |      | Y                        | Y                             | N                                                 |                                | Y                                                 | Middle OR Pole                 | N                                                 |
| CC3195      | Outer membrane protein oprM                                                                                                              |      | N                        | N                             | N                                                 |                                | N                                                 |                                | N                                                 |
| CC3196      | Multidrug resistance efflux pump, periplasmic component                                                                                  |      | Y                        | N                             | N                                                 |                                | N                                                 |                                | N                                                 |
| CC3197      | Cation/multidrug efflux pump acrB                                                                                                        | acrB | N                        | N                             | N                                                 |                                | N                                                 |                                | N                                                 |
| CC3198      | Nitrate/nitrite sensor histidine kinase narX                                                                                             | narX | Y                        | Y                             | Y                                                 | Patchy/Spotty                  | Y                                                 | Patchy/Spotty                  | Y                                                 |
| CC3199      | Protein Translation Elongation Factor Tu (EF-TU)                                                                                         |      | Y                        | N                             | N                                                 |                                | N                                                 |                                | N                                                 |
| CC3200      | Protein Translation Elongation Factor G (EF-G)                                                                                           |      | Y                        | N                             | N                                                 |                                | N                                                 |                                | N                                                 |
| CC3201      | SSU ribosomal protein S7P                                                                                                                |      | Y                        | Y                             | N                                                 |                                | N                                                 |                                | N                                                 |
| CC3202      | SSU ribosomal protein S12P                                                                                                               |      | Y                        | Y                             | N                                                 |                                | N                                                 |                                | N                                                 |
| CC3203      | Hypothetical protein                                                                                                                     |      | Y                        | Y                             | Y                                                 | Patchy/Spotty                  | N                                                 |                                | N                                                 |
| CC3204      | Homoserine O-acetyltransferase                                                                                                           |      | Y                        | Y                             | N                                                 |                                | N                                                 |                                | N                                                 |
| CC3205      | Transcription antitermination protein nusG                                                                                               |      | Y                        | Y                             | N                                                 |                                | N                                                 |                                | N                                                 |
| CC3206      | Protein translocase subunit secE                                                                                                         |      | N                        | N                             | N                                                 |                                | N                                                 |                                | N                                                 |
| CC3207      | Hypothetical protein                                                                                                                     |      | Y                        | Y                             | N                                                 |                                | N                                                 |                                | N                                                 |
| CC3208      | Ferredoxin--NADP reductase                                                                                                               |      | Y                        | Y                             | N                                                 |                                | N                                                 |                                | N                                                 |
| CC3209      | Molybdopterin biosynthesis MoeA protein                                                                                                  |      | N                        | N                             | N                                                 |                                | N                                                 |                                | N                                                 |
| CC3210      | UDP-N-acetylglucosamine 4,6-dehydratase / UDP-D-quinovosamine 4-dehydrogenase                                                            |      | Y                        | Y                             | Y                                                 | Patchy/Spotty                  | N                                                 |                                | N                                                 |
| CC3211      | DNA polymerase III alpha subunit                                                                                                         |      | N                        | N                             | N                                                 |                                | N                                                 |                                | N                                                 |
| CC3212      | Hypothetical cytosolic protein                                                                                                           |      | Y                        | Y                             | N                                                 |                                | N                                                 |                                | N                                                 |
| CC3213      | Conserved hypothetical protein                                                                                                           |      | N                        | N                             | N                                                 |                                | N                                                 |                                | N                                                 |
| CC3214      | Biotin carboxylase                                                                                                                       |      | Y                        | N                             | N                                                 |                                | N                                                 |                                | N                                                 |
| CC3215      | D-3-phosphoglycerate dehydrogenase                                                                                                       |      | Y                        | Y                             | N                                                 |                                | N                                                 |                                | N                                                 |
| CC3216      | Phosphoserine aminotransferase                                                                                                           |      | N                        | N                             | N                                                 |                                | N                                                 |                                | N                                                 |
| CC3217      | Hypothetical protein                                                                                                                     |      | Y                        | Y                             | N                                                 |                                | N                                                 |                                | N                                                 |
| CC3218      | Hypothetical protein                                                                                                                     |      | Y                        | Y                             | N                                                 |                                | N                                                 |                                | N                                                 |
| CC3219      | Two-component sensor histidine kinase                                                                                                    |      | Y                        | Y                             | Y                                                 | Bipolar and Unipolar           | N                                                 |                                | N                                                 |
| CC3220      | Hypothetical protein                                                                                                                     |      | Y                        | Y                             | N                                                 |                                | N                                                 |                                | N                                                 |
| CC3221      | Putative epimerase                                                                                                                       |      | Y                        | Y                             | N                                                 |                                | N                                                 |                                | N                                                 |
| CC3222      | Hypothetical protein                                                                                                                     |      | Y                        | Y                             | N                                                 |                                | N                                                 |                                | N                                                 |
| CC3223      | Phosphomethylpyrimidine kinase / Hydroxymethylpyrimidine kinase                                                                          |      | Y                        | Y                             | N                                                 |                                | N                                                 |                                | N                                                 |
| CC3224      | Dihydropteroate synthase                                                                                                                 |      | N                        | N                             | N                                                 |                                | N                                                 |                                | N                                                 |
| CC3225      | PAS-family sensor histidine kinase                                                                                                       |      | Y                        | Y                             | N                                                 |                                | Y                                                 | Pole                           | N                                                 |
| CC3226      | Cell division protein ftsH                                                                                                               | ftsH | N                        | N                             | N                                                 |                                | N                                                 |                                | N                                                 |
| CC3227      | PP-loop family cell cycle control ATPase                                                                                                 |      | N                        | N                             | N                                                 |                                | N                                                 |                                | N                                                 |
| CC3228      | Tol system periplasmic component YbgF                                                                                                    | ybgF | N                        | N                             | N                                                 |                                | N                                                 |                                | N                                                 |
| CC3229      | Peptidoglycan-associated lipoprotein pal                                                                                                 | pal  | Y                        | Y                             | Y                                                 | Patchy/Spotty                  | N                                                 |                                | N                                                 |
| CC3230      | TolB protein                                                                                                                             | tolB | Y                        | Y                             | Y                                                 | Patchy/Spotty                  | N                                                 |                                | N                                                 |
| CC3231      | TolA protein                                                                                                                             | tolA | Y                        | Y                             | N                                                 |                                | N                                                 |                                | N                                                 |
| CC3232      | TolR protein                                                                                                                             | tolR | Y                        | N                             | N                                                 |                                | N                                                 |                                | N                                                 |
| CC3233      | TolQ protein                                                                                                                             | tolQ | N                        | N                             | N                                                 |                                | N                                                 |                                | N                                                 |

| Gene Number | Annotation                                                                       | Gene | Entry Vector Constructed | Entry Vector Sequence Correct | Localized and Sequence-verified C-terminal Fusion | Localization w/ C-terminal Tag | Localized and Sequence-verified N-terminal Fusion | Localization w/ N-terminal Tag | Protein Localized as Both N- or C-terminal Fusion |
|-------------|----------------------------------------------------------------------------------|------|--------------------------|-------------------------------|---------------------------------------------------|--------------------------------|---------------------------------------------------|--------------------------------|---------------------------------------------------|
| CC3234      | Short-chain acyl-CoA hydrolase                                                   |      | Y                        | Y                             | N                                                 |                                | N                                                 |                                | N                                                 |
| CC3235      | Hypothetical protein                                                             |      | Y                        | Y                             | N                                                 |                                | N                                                 |                                | N                                                 |
| CC3236      | Holliday junction DNA helicase ruvB                                              | ruvB | Y                        | Y                             | N                                                 |                                | N                                                 |                                | N                                                 |
| CC3237      | Holliday junction DNA helicase ruvA                                              | ruvA | Y                        | Y                             | N                                                 |                                | N                                                 |                                | N                                                 |
| CC3238      | Crossover junction endodeoxyribonuclease ruvC                                    | ruvC | Y                        | Y                             | N                                                 |                                | N                                                 |                                | N                                                 |
| CC3239      | N-acyl-L-amino acid amidohydrolase                                               |      | Y                        | Y                             | Y                                                 | Patchy/Spotty                  | N                                                 |                                | N                                                 |
| CC3240      | Hypothetical protein                                                             |      | Y                        | Y                             | N                                                 |                                | Y                                                 | Patchy/Spotty                  | N                                                 |
| CC3241      | Hypothetical protein                                                             |      | Y                        | Y                             | N                                                 |                                | N                                                 |                                | N                                                 |
| CC3242      | Phosphoribosylamidoimidazole-succinocarboxamide synthase                         |      | N                        | N                             | N                                                 |                                | N                                                 |                                | N                                                 |
| CC3243      | Hypothetical cytosolic protein                                                   |      | Y                        | Y                             | N                                                 |                                | N                                                 |                                | N                                                 |
| CC3244      | Hypothetical protein                                                             |      | Y                        | Y                             | N                                                 |                                | N                                                 |                                | N                                                 |
| CC3245      | 5-formyltetrahydrofolate cyclo-ligase                                            |      | Y                        | Y                             | N                                                 |                                | N                                                 |                                | N                                                 |
| CC3246      | Acylamino-acid-releasing enzyme                                                  |      | Y                        | Y                             | N                                                 |                                | N                                                 |                                | N                                                 |
| CC3247      | Hypothetical cytosolic protein                                                   |      | N                        | N                             | N                                                 |                                | N                                                 |                                | N                                                 |
| CC3248      | Glyceraldehyde 3-phosphate dehydrogenase                                         |      | Y                        | Y                             | N                                                 |                                | N                                                 |                                | N                                                 |
| CC3249      | Phosphoglycerate kinase                                                          |      | N                        | N                             | N                                                 |                                | N                                                 |                                | N                                                 |
| CC3250      | Fructose-bisphosphate aldolase                                                   |      | Y                        | Y                             | N                                                 |                                | N                                                 |                                | N                                                 |
| CC3251      | Hypothetical protein                                                             |      | Y                        | Y                             | N                                                 |                                | N                                                 |                                | N                                                 |
| CC3252      | ECF-family RNA polymerase sigma factor                                           |      | Y                        | Y                             | N                                                 |                                | N                                                 |                                | N                                                 |
| CC3253      | ECF-family RNA polymerase sigma factor                                           |      | Y                        | Y                             | N                                                 |                                | N                                                 |                                | N                                                 |
| CC3254      | Hypothetical protein                                                             |      | Y                        | Y                             | N                                                 |                                | N                                                 |                                | N                                                 |
| CC3255      | Hypothetical protein                                                             |      | Y                        | Y                             | N                                                 |                                | N                                                 |                                | N                                                 |
| CC3256      | Hypothetical protein                                                             |      | Y                        | Y                             | N                                                 |                                | N                                                 |                                | N                                                 |
| CC3257      | DoxX family protein                                                              |      | Y                        | Y                             | N                                                 |                                | N                                                 |                                | N                                                 |
| CC3258      | chemotaxis receiver domain protein cheYIII                                       |      | Y                        | Y                             | N                                                 |                                | N                                                 |                                | N                                                 |
| CC3259      | Hypothetical CheE protein                                                        |      | Y                        | Y                             | N                                                 |                                | N                                                 |                                | N                                                 |
| CC3260      | Hypothetical protein                                                             |      | Y                        | Y                             | Y                                                 | Middle AND Pole                | N                                                 |                                | N                                                 |
| CC3261      | Acetyltransferase                                                                |      | N                        | N                             | N                                                 |                                | N                                                 |                                | N                                                 |
| CC3262      | Bacterioferritin                                                                 |      | Y                        | Y                             | N                                                 |                                | N                                                 |                                | N                                                 |
| CC3263      | Bacterioferritin-associated ferredoxin                                           |      | Y                        | Y                             | N                                                 |                                | N                                                 |                                | N                                                 |
| CC3264      | Thiamin-phosphate pyrophosphorylase                                              |      | Y                        | N                             | N                                                 |                                | N                                                 |                                | N                                                 |
| CC3265      | Hypothetical protein                                                             |      | Y                        | Y                             | N                                                 |                                | N                                                 |                                | N                                                 |
| CC3266      | RNA polymerase sigma-J factor                                                    |      | Y                        | Y                             | N                                                 |                                | N                                                 |                                | N                                                 |
| CC3267      | Conserved hypothetical protein                                                   |      | Y                        | Y                             | N                                                 |                                | N                                                 |                                | N                                                 |
| CC3268      | Conserved hypothetical protein                                                   |      | Y                        | Y                             | N                                                 |                                | N                                                 |                                | N                                                 |
| CC3269      | Myo-inositol-1(or 4)-monophosphatase                                             |      | N                        | N                             | N                                                 |                                | N                                                 |                                | N                                                 |
| CC3270      | Transcriptional regulator, Cro/Ci family                                         |      | Y                        | Y                             | N                                                 |                                | N                                                 |                                | N                                                 |
| CC3271      | Hypothetical protein                                                             |      | Y                        | Y                             | N                                                 |                                | N                                                 |                                | N                                                 |
| CC3272      | Glycerophosphoryl diester phosphodiesterase                                      |      | Y                        | N                             | N                                                 |                                | N                                                 |                                | N                                                 |
| CC3273      | Hypothetical cytosolic protein                                                   |      | Y                        | Y                             | N                                                 |                                | N                                                 |                                | N                                                 |
| CC3274      | Multidrug/protein/lipid ABC transporter family, ATP-binding and permease protein |      | Y                        | Y                             | N                                                 |                                | N                                                 |                                | N                                                 |
| CC3275      | LSU ribosomal protein L31P                                                       |      | Y                        | Y                             | N                                                 |                                | N                                                 |                                | N                                                 |
| CC3276      | Hypothetical cytosolic protein                                                   |      | Y                        | Y                             | N                                                 |                                | N                                                 |                                | N                                                 |
| CC3277      | Multimodular transpeptidase-transglycosylase PBP 1A                              |      | Y                        | Y                             | Y                                                 | Patchy/Spotty                  | N                                                 |                                | N                                                 |
| CC3278      | Aspartate racemase                                                               |      | N                        | N                             | N                                                 |                                | N                                                 |                                | N                                                 |
| CC3279      | Lantibiotic export permease protein                                              |      | Y                        | N                             | N                                                 |                                | N                                                 |                                | N                                                 |
| CC3280      | Lantibiotic transport ATP-binding protein                                        |      | N                        | N                             | N                                                 |                                | N                                                 |                                | N                                                 |
| CC3281      | Hypothetical protein                                                             |      | Y                        | Y                             | N                                                 |                                | N                                                 |                                | N                                                 |

| Gene Number | Annotation                                                                        | Gene | Entry Vector Constructed | Entry Vector Sequence Correct | Localized and Sequence-verified C-terminal Fusion | Localization w/ C-terminal Tag | Localized and Sequence-verified N-terminal Fusion | Localization w/ N-terminal Tag | Protein Localized as Both N- or C-terminal Fusion |
|-------------|-----------------------------------------------------------------------------------|------|--------------------------|-------------------------------|---------------------------------------------------|--------------------------------|---------------------------------------------------|--------------------------------|---------------------------------------------------|
| CC3282      | Transcriptional regulator, Cro/C1 family Phosphoribosylaminoimidazole carboxylase |      | N                        | N                             | N                                                 |                                | N                                                 |                                | N                                                 |
| CC3283      | NCAIR mutase subunit Phosphoribosylaminoimidazole carboxylase                     |      | Y                        | Y                             | N                                                 |                                | N                                                 |                                | N                                                 |
| CC3284      | carboxyltransferase subunit                                                       |      | Y                        | Y                             | N                                                 |                                | N                                                 |                                | N                                                 |
| CC3285      | Two-component response regulator                                                  |      | N                        | N                             | N                                                 |                                | N                                                 |                                | N                                                 |
| CC3286      | Two-component receiver domain protein Trypsin-like serine proteases, typically    |      | Y                        | Y                             | N                                                 |                                | N                                                 |                                | N                                                 |
| CC3287      | periplasmic, contain C-terminal PDZ domain                                        |      | Y                        | Y                             | N                                                 |                                | N                                                 |                                | N                                                 |
| CC3288      | Hypothetical cytosolic protein                                                    |      | Y                        | Y                             | N                                                 |                                | N                                                 |                                | N                                                 |
| CC3289      | Conserved hypothetical protein 3-octaprenyl-4-hydroxybenzoate carboxy-            |      | Y                        | N                             | N                                                 |                                | N                                                 |                                | N                                                 |
| CC3290      | lyase                                                                             |      | Y                        | Y                             | N                                                 |                                | N                                                 |                                | N                                                 |
| CC3291      | Hypothetical protein                                                              |      | Y                        | Y                             | N                                                 |                                | N                                                 |                                | N                                                 |
| CC3292      | Hypothetical cytosolic protein                                                    |      | Y                        | Y                             | N                                                 |                                | N                                                 |                                | N                                                 |
| CC3293      | Quinone oxidoreductase                                                            |      | N                        | N                             | N                                                 |                                | N                                                 |                                | N                                                 |
| CC3294      | Hypothetical protein                                                              |      | Y                        | Y                             | N                                                 |                                | N                                                 |                                | N                                                 |
| CC3295      | regulator of CtrA degradation rcdA                                                | rcdA | Y                        | Y                             | N                                                 |                                | Y                                                 | Pole                           | N                                                 |
| CC3296      | Hypothetical protein                                                              |      | Y                        | Y                             | Y                                                 | Patchy/Spotty                  | N                                                 |                                | N                                                 |
| CC3297      | SSU ribosomal protein S21P                                                        |      | Y                        | N                             | N                                                 |                                | N                                                 |                                | N                                                 |
| CC3298      | Sodium export permease protein                                                    |      | Y                        | Y                             | N                                                 |                                | N                                                 |                                | N                                                 |
| CC3299      | ABC transporter ATP-binding protein                                               |      | Y                        | Y                             | N                                                 |                                | N                                                 |                                | N                                                 |
| CC3300      | Putative hydrolase                                                                |      | N                        | N                             | N                                                 |                                | N                                                 |                                | N                                                 |
| CC3301      | Peptidoglycan-specific endopeptidase, M23 family                                  |      | Y                        | Y                             | N                                                 |                                | N                                                 |                                | N                                                 |
| CC3302      | Hypothetical protein                                                              |      | Y                        | Y                             | Y                                                 | Middle OR Pole                 | Y                                                 | Middle OR Pole                 | Y                                                 |
| CC3303      | NAD(P) transhydrogenase subunit beta                                              |      | Y                        | Y                             | N                                                 |                                | N                                                 |                                | N                                                 |
| CC3304      | NAD(P) transhydrogenase alpha subunit                                             |      | Y                        | Y                             | N                                                 |                                | N                                                 |                                | N                                                 |
| CC3305      | NAD(P) transhydrogenase alpha subunit                                             |      | Y                        | Y                             | N                                                 |                                | N                                                 |                                | N                                                 |
| CC3306      | Hypothetical protein                                                              |      | Y                        | Y                             | N                                                 |                                | N                                                 |                                | N                                                 |
| CC3307      | Hypothetical glycosyltransferase family 9 protein                                 |      | Y                        | Y                             | N                                                 |                                | N                                                 |                                | N                                                 |
| CC3308      | Hydrolase                                                                         |      | Y                        | Y                             | N                                                 |                                | N                                                 |                                | N                                                 |
| CC3309      | Thioesterase superfamily protein                                                  |      | Y                        | Y                             | N                                                 |                                | N                                                 |                                | N                                                 |
| CC3310      | RNA polymerase ECF-type sigma factor                                              |      | Y                        | Y                             | N                                                 |                                | N                                                 |                                | N                                                 |
| CC3311      | Hypothetical protein                                                              |      | Y                        | Y                             | N                                                 |                                | N                                                 |                                | N                                                 |
| CC3312      | 2-polyprenylphenol 6-hydroxylase accessory protein ubiB                           |      | Y                        | N                             | N                                                 |                                | N                                                 |                                | N                                                 |
| CC3313      | Oligoendopeptidase F                                                              |      | Y                        | Y                             | N                                                 |                                | N                                                 |                                | N                                                 |
| CC3314      | Conserved hypothetical protein                                                    |      | Y                        | Y                             | N                                                 |                                | N                                                 |                                | N                                                 |
| CC3315      | AAA-family response regulator tacA                                                |      | Y                        | Y                             | Y                                                 | Pole                           | N                                                 |                                | N                                                 |
| CC3316      | Hypothetical protein                                                              |      | Y                        | Y                             | N                                                 |                                | N                                                 |                                | N                                                 |
| CC3317      | Hypothetical protein                                                              |      | N                        | N                             | N                                                 |                                | N                                                 |                                | N                                                 |
| CC3318      | Hypothetical protein                                                              |      | Y                        | Y                             | N                                                 |                                | N                                                 |                                | N                                                 |
| CC3319      | Hypothetical cytosolic protein                                                    |      | Y                        | N                             | N                                                 |                                | N                                                 |                                | N                                                 |
| CC3320      | Hydrolase (HAD superfamily)                                                       |      | Y                        | Y                             | N                                                 |                                | N                                                 |                                | N                                                 |
| CC3321      | LSU ribosomal protein L36P                                                        |      | Y                        | Y                             | N                                                 |                                | N                                                 |                                | N                                                 |
| CC3322      | Membrane-bound lytic murein transglycosylase B                                    |      | Y                        | Y                             | N                                                 |                                | N                                                 |                                | N                                                 |
| CC3323      | Aldose 1-epimerase                                                                |      | Y                        | Y                             | N                                                 |                                | N                                                 |                                | N                                                 |
| CC3324      | Hypothetical protein                                                              |      | N                        | N                             | N                                                 |                                | N                                                 |                                | N                                                 |
| CC3325      | Two-component response regulator                                                  |      | Y                        | Y                             | N                                                 |                                | N                                                 |                                | N                                                 |

| Gene Number | Annotation                                           | Gene | Entry Vector Constructed | Entry Vector Sequence Correct | Localized and Sequence-verified C-terminal Fusion | Localization w/ C-terminal Tag | Localized and Sequence-verified N-terminal Fusion | Localization w/ N-terminal Tag | Protein Localized as Both N- or C-terminal Fusion |
|-------------|------------------------------------------------------|------|--------------------------|-------------------------------|---------------------------------------------------|--------------------------------|---------------------------------------------------|--------------------------------|---------------------------------------------------|
| CC3326      | Putative peptidoglycan binding domain / FecR protein |      | Y                        | Y                             | N                                                 |                                | N                                                 |                                | N                                                 |
| CC3327      | Phosphate regulon sensor protein phoR                |      | N                        | N                             | N                                                 |                                | N                                                 |                                | N                                                 |
| CC3328      | Hypothetical protein                                 |      | Y                        | Y                             | N                                                 |                                | N                                                 |                                | N                                                 |
| CC3329      | Hypothetical protein                                 |      | Y                        | Y                             | N                                                 |                                | N                                                 |                                | N                                                 |
| CC3330      | Hypothetical protein                                 |      | Y                        | Y                             | N                                                 |                                | N                                                 |                                | N                                                 |
| CC3331      | Hypothetical cytosolic protein                       |      | Y                        | Y                             | N                                                 |                                | N                                                 |                                | N                                                 |
| CC3332      | Transposase                                          |      | N                        | N                             | N                                                 |                                | N                                                 |                                | N                                                 |
| CC3333      | Transposase                                          |      | Y                        | N                             | N                                                 |                                | N                                                 |                                | N                                                 |
| CC3334      | Hypothetical cytosolic protein                       |      | Y                        | Y                             | N                                                 |                                | N                                                 |                                | N                                                 |
| CC3335      |                                                      |      | Y                        | Y                             | N                                                 |                                | N                                                 |                                | N                                                 |
| CC3336      | TonB-dependent receptor                              |      | Y                        | Y                             | N                                                 |                                | N                                                 |                                | N                                                 |
| CC3337      | Aminopeptidase                                       |      | N                        | N                             | N                                                 |                                | N                                                 |                                | N                                                 |
| CC3338      | Feruloyl-CoA synthetase                              |      | Y                        | Y                             | Y                                                 | Pole                           | N                                                 |                                | N                                                 |
| CC3339      | Hypothetical protein                                 |      | N                        | N                             | N                                                 |                                | N                                                 |                                | N                                                 |
| CC3340      | Hypothetical protein                                 |      | Y                        | Y                             | N                                                 |                                | N                                                 |                                | N                                                 |
| CC3341      | Methyltransferase                                    |      | N                        | N                             | N                                                 |                                | N                                                 |                                | N                                                 |
| CC3342      | possible IS element                                  |      | Y                        | Y                             | N                                                 |                                | N                                                 |                                | N                                                 |
| CC3343      | Transcriptional regulator                            |      | Y                        | Y                             | N                                                 |                                | N                                                 |                                | N                                                 |
| CC3344      | UDP-2,3-diacetylglucosamine hydrolase                |      | Y                        | Y                             | N                                                 |                                | N                                                 |                                | N                                                 |
| CC3345      | Glycosyltransferase                                  |      | Y                        | N                             | N                                                 |                                | N                                                 |                                | N                                                 |
| CC3346      | Lipase                                               |      | N                        | N                             | N                                                 |                                | N                                                 |                                | N                                                 |
| CC3347      | Hypothetical protein                                 |      | Y                        | Y                             | N                                                 |                                | N                                                 |                                | N                                                 |
| CC3348      | Hypothetical protein                                 |      | Y                        | Y                             | N                                                 |                                | N                                                 |                                | N                                                 |
| CC3349      | Methyl-accepting chemotaxis protein                  |      | Y                        | Y                             | N                                                 |                                | Y                                                 | Pole                           | N                                                 |
| CC3350      | Hypothetical protein                                 |      | Y                        | Y                             | Y                                                 | Patchy/Spotty                  | N                                                 |                                | N                                                 |
| CC3351      | Hypothetical protein                                 |      | Y                        | Y                             | N                                                 |                                | N                                                 |                                | N                                                 |
| CC3352      | Glycine dehydrogenase [decarboxylating]              |      | Y                        | N                             | N                                                 |                                | N                                                 |                                | N                                                 |
| CC3353      | Glycine dehydrogenase [decarboxylating]              |      | Y                        | Y                             | N                                                 |                                | N                                                 |                                | N                                                 |
| CC3354      | Glycine cleavage system H protein                    |      | Y                        | Y                             | N                                                 |                                | N                                                 |                                | N                                                 |
| CC3355      | Aminomethyltransferase                               |      | Y                        | Y                             | N                                                 |                                | N                                                 |                                | N                                                 |
| CC3356      | Hypothetical cytosolic protein                       |      | Y                        | Y                             | N                                                 |                                | N                                                 |                                | N                                                 |
| CC3357      | Hypothetical protein                                 |      | Y                        | Y                             | N                                                 |                                | N                                                 |                                | N                                                 |
| CC3358      | Methyl-accepting chemotaxis protein                  |      | Y                        | Y                             | N                                                 |                                | Y                                                 | Pole                           | N                                                 |
| CC3359      | Arginyl-tRNA synthetase                              |      | N                        | N                             | N                                                 |                                | N                                                 |                                | N                                                 |
| CC3360      | Hypothetical protein                                 |      | N                        | N                             | N                                                 |                                | N                                                 |                                | N                                                 |
| CC3361      | 4-hydroxy-3-methylbut-2-enyl diphosphate reductase   |      | Y                        | Y                             | N                                                 |                                | N                                                 |                                | N                                                 |
| CC3362      | Hypothetical protein                                 |      | Y                        | Y                             | N                                                 |                                | N                                                 |                                | N                                                 |
| CC3363      | death on curing toxin protein doc                    | doc  | Y                        | N                             | N                                                 |                                | N                                                 |                                | N                                                 |
| CC3364      | Homoserine kinase                                    |      | Y                        | N                             | N                                                 |                                | N                                                 |                                | N                                                 |
| CC3365      | Ribonuclease HI                                      |      | Y                        | Y                             | Y                                                 | Central - Focus                | N                                                 |                                | N                                                 |
| CC3366      | Rhodanese-related sulfurtransferases                 |      | Y                        | Y                             | N                                                 |                                | N                                                 |                                | N                                                 |
| CC3367      | AraC-family transcription regulator ftrA             |      | N                        | N                             | N                                                 |                                | N                                                 |                                | N                                                 |
| CC3368      | Transcriptional regulator, MarR family               |      | Y                        | Y                             | N                                                 |                                | N                                                 |                                | N                                                 |
| CC3369      |                                                      |      | Y                        | Y                             | N                                                 |                                | N                                                 |                                | N                                                 |
| CC3370      | Conserved hypothetical protein                       |      | Y                        | Y                             | Y                                                 | Central - Focus                | N                                                 |                                | N                                                 |
| CC3371      | DNA integration/recombination/inversion protein      |      | Y                        | Y                             | N                                                 |                                | N                                                 |                                | N                                                 |
| CC3372      | ABC transporter permease protein                     |      | Y                        | Y                             | N                                                 |                                | N                                                 |                                | N                                                 |
| CC3373      | ABC transporter ATP-binding protein                  |      | N                        | N                             | N                                                 |                                | N                                                 |                                | N                                                 |
| CC3374      | Hypothetical protein                                 |      | Y                        | Y                             | Y                                                 | Patchy/Spotty                  | N                                                 |                                | N                                                 |



| Gene Number | Annotation                                                            | Gene  | Entry Vector Constructed | Entry Vector Sequence Correct | Localized and Sequence-verified C-terminal Fusion | Localization w/ C-terminal Tag | Localized and Sequence-verified N-terminal Fusion | Localization w/ N-terminal Tag | Protein Localized as Both N- or C-terminal Fusion |
|-------------|-----------------------------------------------------------------------|-------|--------------------------|-------------------------------|---------------------------------------------------|--------------------------------|---------------------------------------------------|--------------------------------|---------------------------------------------------|
| CC3375      | Membrane protease family, stomatin/prohibitin homologs                |       | Y                        | N                             | N                                                 |                                | N                                                 |                                | N                                                 |
| CC3376      | Conserved hypothetical protein                                        |       | Y                        | Y                             | N                                                 |                                | N                                                 |                                | N                                                 |
| CC3377      | Hypothetical protein                                                  |       | Y                        | Y                             | N                                                 |                                | N                                                 |                                | N                                                 |
| CC3378      | Hypothetical protein                                                  |       | Y                        | Y                             | N                                                 |                                | Y                                                 | Middle OR Pole                 | N                                                 |
| CC3379      | Nitropropane dioxygenase / Trans-enoyl-CoA reductase family           |       | N                        | N                             | N                                                 |                                | N                                                 |                                | N                                                 |
| CC3380      | 3-oxoacyl-[acyl-carrier protein] reductase                            |       | Y                        | Y                             | N                                                 |                                | N                                                 |                                | N                                                 |
| CC3381      | Transporter                                                           |       | Y                        | Y                             | N                                                 |                                | N                                                 |                                | N                                                 |
| CC3382      | Phosphohydrolase (MutT/nudix family protein)                          |       | Y                        | Y                             | N                                                 |                                | N                                                 |                                | N                                                 |
| CC3383      | Serine protease                                                       |       | Y                        | Y                             | N                                                 |                                | N                                                 |                                | N                                                 |
| CC3384      | D-beta-hydroxybutyrate dehydrogenase                                  |       | Y                        | Y                             | N                                                 |                                | N                                                 |                                | N                                                 |
| CC3385      | Hypothetical cytosolic protein                                        |       | Y                        | Y                             | N                                                 |                                | N                                                 |                                | N                                                 |
| CC3386      | Hypothetical protein                                                  |       | Y                        | Y                             | N                                                 |                                | N                                                 |                                | N                                                 |
| CC3387      | Transcriptional regulators, MarR/EmrR family                          |       | N                        | N                             | N                                                 |                                | N                                                 |                                | N                                                 |
| CC3388      | Hypothetical protein                                                  |       | N                        | N                             | N                                                 |                                | N                                                 |                                | N                                                 |
| CC3389      | FAD/FMN-containing dehydrogenases                                     |       | Y                        | Y                             | N                                                 |                                | N                                                 |                                | N                                                 |
| CC3390      | Sua5/YciO/YrdC/YwC family protein                                     |       | N                        | N                             | N                                                 |                                | N                                                 |                                | N                                                 |
| CC3391      | Ycel/cytochrome b561 periplasmic protein                              |       | Y                        | Y                             | N                                                 |                                | N                                                 |                                | N                                                 |
| CC3392      | Ycel-family periplasmic protein                                       |       | Y                        | Y                             | N                                                 |                                | N                                                 |                                | N                                                 |
| CC3393      | Acyl-CoA dehydrogenase                                                |       | Y                        | Y                             | N                                                 |                                | N                                                 |                                | N                                                 |
| CC3394      | Peroxiredoxin                                                         |       | Y                        | Y                             | N                                                 |                                | N                                                 |                                | N                                                 |
| CC3395      | Transcriptional regulator, algH                                       |       | Y                        | N                             | N                                                 |                                | N                                                 |                                | N                                                 |
| CC3396      | GGDEF/EAL diguanylate cyclase-phosphodiesterase                       |       | Y                        | Y                             | N                                                 |                                | N                                                 |                                | N                                                 |
| CC3397      | Ribosomal-protein-S5-alanine acetyltransferase                        |       | Y                        | N                             | N                                                 |                                | N                                                 |                                | N                                                 |
| CC3398      | Zinc protease                                                         |       | Y                        | Y                             | N                                                 |                                | N                                                 |                                | N                                                 |
| CC3399      | Threonine synthase                                                    |       | Y                        | Y                             | Y                                                 | Pole                           | N                                                 |                                | N                                                 |
| CC3400      | Cytochrome c oxidase assembly protein Surf1                           | Surf1 | Y                        | N                             | N                                                 |                                | N                                                 |                                | N                                                 |
| CC3401      | Zinc-finger protein                                                   |       | Y                        | Y                             | N                                                 |                                | N                                                 |                                | N                                                 |
| CC3402      | Cytochrome c oxidase subunit III coxC                                 | coxC  | Y                        | Y                             | N                                                 |                                | N                                                 |                                | N                                                 |
| CC3403      | Cytochrome c oxidase assembly protein ctaG                            | ctaG  | Y                        | Y                             | N                                                 |                                | N                                                 |                                | N                                                 |
| CC3404      | Hypothetical protein                                                  |       | Y                        | Y                             | N                                                 |                                | N                                                 |                                | N                                                 |
| CC3405      | Protoheme IX farnesyltransferase coxE                                 | coxE  | N                        | N                             | N                                                 |                                | N                                                 |                                | N                                                 |
| CC3406      | Cytochrome c oxidase polypeptide I coxA                               | coxA  | Y                        | Y                             | N                                                 |                                | N                                                 |                                | N                                                 |
| CC3407      | Cytochrome c oxidase polypeptide II coxB                              | coxB  | Y                        | Y                             | N                                                 |                                | N                                                 |                                | N                                                 |
| CC3408      | Transcriptional regulator, PadR family                                |       | N                        | N                             | N                                                 |                                | N                                                 |                                | N                                                 |
| CC3409      | Hypothetical protein                                                  |       | Y                        | N                             | N                                                 |                                | N                                                 |                                | N                                                 |
| CC3410      | Hypothetical membrane associated protein                              |       | Y                        | Y                             | N                                                 |                                | N                                                 |                                | N                                                 |
| CC3411      | Microcin-processing peptidase 2 (TldD)                                |       | Y                        | Y                             | N                                                 |                                | N                                                 |                                | N                                                 |
| CC3412      | Hypothetical protein                                                  |       | Y                        | Y                             | N                                                 |                                | N                                                 |                                | N                                                 |
| CC3413      | Di-/tripeptide transporter                                            |       | Y                        | Y                             | N                                                 |                                | N                                                 |                                | N                                                 |
| CC3414      | Glutamate--cysteine ligase                                            |       | Y                        | Y                             | N                                                 |                                | N                                                 |                                | N                                                 |
| CC3415      | surface protein                                                       |       | Y                        | Y                             | N                                                 |                                | N                                                 |                                | N                                                 |
| CC3416      | Polyphosphate kinase                                                  |       | Y                        | Y                             | N                                                 |                                | Y                                                 | Central - Focus                | N                                                 |
| CC3417      | hypothetical protein                                                  |       | Y                        | Y                             | N                                                 |                                | N                                                 |                                | N                                                 |
| CC3418      | Carboxypeptidase S1                                                   |       | Y                        | Y                             | Y                                                 | Patchy/Spotty                  | N                                                 |                                | N                                                 |
| CC3419      | Transporter                                                           |       | Y                        | Y                             | N                                                 |                                | N                                                 |                                | N                                                 |
| CC3420      | Multidrug resistance ABC transporter ATP-binding and permease protein |       | Y                        | N                             | N                                                 |                                | N                                                 |                                | N                                                 |

| Gene Number | Annotation                                        | Gene | Entry Vector Constructed | Entry Vector Sequence Correct | Localized and Sequence-verified C-terminal Fusion | Localization w/ C-terminal Tag | Localized and Sequence-verified N-terminal Fusion | Localization w/ N-terminal Tag | Protein Localized as Both N- or C-terminal Fusion |
|-------------|---------------------------------------------------|------|--------------------------|-------------------------------|---------------------------------------------------|--------------------------------|---------------------------------------------------|--------------------------------|---------------------------------------------------|
| CC3421      | 4-hydroxybenzoate polyprenyltransferase           |      | N                        | N                             | N                                                 |                                | N                                                 |                                | N                                                 |
| CC3422      | Fatty acid desaturase                             |      | Y                        | Y                             | N                                                 |                                | N                                                 |                                | N                                                 |
| CC3423      | Ribosomal protein L11 methyltransferase           |      | Y                        | Y                             | N                                                 |                                | N                                                 |                                | N                                                 |
| CC3424      | Glyoxalase family protein                         |      | Y                        | N                             | N                                                 |                                | N                                                 |                                | N                                                 |
| CC3425      | NADH-ubiquinone oxidoreductase                    |      | Y                        | N                             | N                                                 |                                | N                                                 |                                | N                                                 |
| CC3426      | Conserved hypothetical protein                    |      | Y                        | Y                             | N                                                 |                                | N                                                 |                                | N                                                 |
| CC3427      | Integral membrane protein                         |      | Y                        | Y                             | N                                                 |                                | N                                                 |                                | N                                                 |
| CC3428      | 2,5-diketo-D-gluconic acid reductase              |      | Y                        | Y                             | N                                                 |                                | N                                                 |                                | N                                                 |
| CC3429      | Hypothetical protein                              |      | Y                        | Y                             | N                                                 |                                | N                                                 |                                | N                                                 |
| CC3430      | Gamma-glutamyl phosphate reductase                |      | N                        | N                             | N                                                 |                                | N                                                 |                                | N                                                 |
| CC3431      | Nicotinate-nucleotide adenyltransferase           |      | N                        | N                             | N                                                 |                                | N                                                 |                                | N                                                 |
| CC3432      | iojap protein family                              |      | Y                        | Y                             | N                                                 |                                | N                                                 |                                | N                                                 |
| CC3433      | Hypothetical cytosolic protein                    |      | Y                        | Y                             | N                                                 |                                | N                                                 |                                | N                                                 |
| CC3434      | Peptidoglycan-specific endopeptidase, M23 family  |      | Y                        | Y                             | N                                                 |                                | N                                                 |                                | N                                                 |
| CC3435      | Carboxy-terminal processing protease precursor    |      | Y                        | Y                             | Y                                                 | Patchy/Spotty                  | N                                                 |                                | N                                                 |
| CC3436      | TonB-dependent receptor                           |      | Y                        | Y                             | N                                                 |                                | N                                                 |                                | N                                                 |
| CC3437      | Hypothetical protein                              |      | Y                        | Y                             | N                                                 |                                | N                                                 |                                | N                                                 |
| CC3438      |                                                   |      | Y                        | Y                             | N                                                 |                                | N                                                 |                                | N                                                 |
| CC3439      | Hypothetical protein                              |      | N                        | N                             | N                                                 |                                | N                                                 |                                | N                                                 |
| CC3440      | Conserved hypothetical protein                    |      | Y                        | Y                             | N                                                 |                                | N                                                 |                                | N                                                 |
| CC3441      | Bis(5'-nucleosyl)-tetraphosphatase (asymmetrical) |      | Y                        | Y                             | Y                                                 | Patchy/Spotty                  | Y                                                 | Patchy/Spotty                  | Y                                                 |
| CC3442      | Esterase Lipase Family Protein                    |      | Y                        | Y                             | N                                                 |                                | N                                                 |                                | N                                                 |
| CC3443      | Quaternary ammonium compound-resistance protein   |      | Y                        | Y                             | N                                                 |                                | N                                                 |                                | N                                                 |
| CC3444      | Conserved hypothetical protein                    |      | Y                        | Y                             | N                                                 |                                | N                                                 |                                | N                                                 |
| CC3445      | ATP synthase epsilon chain                        |      | N                        | N                             | N                                                 |                                | N                                                 |                                | N                                                 |
| CC3446      | Hypothetical protein                              |      | Y                        | Y                             | N                                                 |                                | N                                                 |                                | N                                                 |
| CC3447      | ATP synthase beta chain                           |      | Y                        | Y                             | N                                                 |                                | Y                                                 | Patchy/Spotty                  | N                                                 |
| CC3448      | ATP synthase gamma chain                          |      | Y                        | Y                             | N                                                 |                                | N                                                 |                                | N                                                 |
| CC3449      | ATP synthase alpha chain                          |      | Y                        | Y                             | N                                                 |                                | Y                                                 | Patchy/Spotty                  | N                                                 |
| CC3450      | ATP synthase delta chain                          |      | Y                        | Y                             | N                                                 |                                | N                                                 |                                | N                                                 |
| CC3451      | Hypothetical protein                              |      | Y                        | N                             | N                                                 |                                | N                                                 |                                | N                                                 |
| CC3452      | Hypothetical protein                              |      | Y                        | Y                             | N                                                 |                                | N                                                 |                                | N                                                 |
| CC3453      |                                                   |      | Y                        | Y                             | N                                                 |                                | N                                                 |                                | N                                                 |
| CC3454      | Acyl-CoA dehydrogenase                            |      | Y                        | Y                             | N                                                 |                                | N                                                 |                                | N                                                 |
| CC3455      | LemA protein                                      |      | Y                        | Y                             | Y                                                 | Patchy/Spotty                  | N                                                 |                                | N                                                 |
| CC3456      | Hypothetical membrane spanning protein            |      | Y                        | Y                             | N                                                 |                                | N                                                 |                                | N                                                 |
| CC3457      | Conserved hypothetical protein                    |      | Y                        | Y                             | N                                                 |                                | N                                                 |                                | N                                                 |
| CC3458      | CAAX amino terminal protease family               |      | Y                        | Y                             | N                                                 |                                | N                                                 |                                | N                                                 |
| CC3459      | Hypothetical cytosolic protein                    |      | Y                        | Y                             | N                                                 |                                | N                                                 |                                | N                                                 |
| CC3460      | D-aminoacylase                                    |      | Y                        | Y                             | N                                                 |                                | N                                                 |                                | N                                                 |
| CC3461      | TonB-dependent receptor                           |      | N                        | N                             | N                                                 |                                | N                                                 |                                | N                                                 |
| CC3462      | 3-ketoacyl-CoA thiolase                           |      | Y                        | N                             | N                                                 |                                | N                                                 |                                | N                                                 |
| CC3463      | Hypothetical protein                              |      | N                        | N                             | N                                                 |                                | N                                                 |                                | N                                                 |
| CC3464      | DNA polymerase I                                  |      | N                        | N                             | N                                                 |                                | N                                                 |                                | N                                                 |
| CC3465      | ATP-dependent DNA helicase recQ                   |      | Y                        | Y                             | Y                                                 | Central - Focus                | N                                                 |                                | N                                                 |
| CC3466      | Hypothetical protein                              |      | N                        | N                             | N                                                 |                                | N                                                 |                                | N                                                 |
| CC3467      | Hypothetical protein                              |      | Y                        | Y                             | N                                                 |                                | N                                                 |                                | N                                                 |
| CC3468      | Transporter, drug/metabolite exporter family      |      | Y                        | Y                             | N                                                 |                                | N                                                 |                                | N                                                 |

| Gene Number | Annotation                                                           | Gene | Entry Vector Constructed | Entry Vector Sequence Correct | Localized and Sequence-verified C-terminal Fusion | Localization w/ C-terminal Tag | Localized and Sequence-verified N-terminal Fusion | Localization w/ N-terminal Tag | Protein Localized as Both N- or C-terminal Fusion |
|-------------|----------------------------------------------------------------------|------|--------------------------|-------------------------------|---------------------------------------------------|--------------------------------|---------------------------------------------------|--------------------------------|---------------------------------------------------|
| CC3469      | 3'(2'),5'-bisphosphate nucleotidase / Myo-inositol 1-(4-)phosphatase |      | Y                        | N                             | N                                                 |                                | N                                                 |                                | N                                                 |
| CC3470      | Histidine phosphotransferase chpT                                    | chpT | Y                        | Y                             | N                                                 |                                | Y                                                 | Pole                           | N                                                 |
| CC3471      | chemotaxis receiver domain protein cheYIV                            |      | Y                        | Y                             | N                                                 |                                | N                                                 |                                | N                                                 |
| CC3472      | Chemotaxis protein methyltransferase                                 |      | Y                        | Y                             | N                                                 |                                | N                                                 |                                | N                                                 |
| CC3473      | Entericidin B homolog                                                |      | Y                        | Y                             | Y                                                 | Patchy/Spotty                  | N                                                 |                                | N                                                 |
| CC3474      | Two-component sensor histidine kinase                                |      | Y                        | N                             | N                                                 |                                | N                                                 |                                | N                                                 |
| CC3475      | RNA polymerase ECF-type sigma factor sigT                            | sigT | Y                        | Y                             | N                                                 |                                | N                                                 |                                | N                                                 |
| CC3476      | Conserved hypothetical protein                                       |      | Y                        | Y                             | N                                                 |                                | N                                                 |                                | N                                                 |
| CC3477      | Hybrid sigma factor/two-component receiver protein phyR              | phyR | Y                        | Y                             | N                                                 |                                | N                                                 |                                | N                                                 |
| CC3478      | Outer membrane lipoprotein Blc                                       |      | Y                        | Y                             | N                                                 |                                | N                                                 |                                | N                                                 |
| CC3479      |                                                                      |      | N                        | N                             | N                                                 |                                | N                                                 |                                | N                                                 |
| CC3480      | SIR2 family protein                                                  |      | N                        | N                             | N                                                 |                                | N                                                 |                                | N                                                 |
| CC3481      | ubiquinone/menaquinone biosynthesis methyltransferase ubiE           | ubiE | Y                        | N                             | N                                                 |                                | N                                                 |                                | N                                                 |
| CC3482      | Conserved hypothetical protein                                       |      | Y                        | Y                             | N                                                 |                                | N                                                 |                                | N                                                 |
| CC3483      | Acetylglutamate kinase                                               |      | Y                        | Y                             | N                                                 |                                | N                                                 |                                | N                                                 |
| CC3484      | Two-component sensor histidine kinase divL                           |      | Y                        | Y                             | N                                                 |                                | N                                                 |                                | N                                                 |
| CC3485      | Aspartate-semialdehyde dehydrogenase                                 |      | Y                        | Y                             | N                                                 |                                | N                                                 |                                | N                                                 |
| CC3486      | Integral membrane protein                                            |      | Y                        | Y                             | N                                                 |                                | N                                                 |                                | N                                                 |
| CC3487      | Conserved membrane protein (hemolysin III homolog)                   |      | Y                        | N                             | N                                                 |                                | N                                                 |                                | N                                                 |
| CC3488      | Patatin family phospholipase domain protein                          |      | N                        | N                             | N                                                 |                                | N                                                 |                                | N                                                 |
| CC3489      | Beta-lactamase family protein                                        |      | Y                        | Y                             | N                                                 |                                | N                                                 |                                | N                                                 |
| CC3490      | Hypothetical protein                                                 |      | Y                        | Y                             | N                                                 |                                | N                                                 |                                | N                                                 |
| CC3491      | Hypothetical protein                                                 |      | Y                        | Y                             | N                                                 |                                | N                                                 |                                | N                                                 |
| CC3492      | Hypothetical protein                                                 |      | Y                        | Y                             | N                                                 |                                | N                                                 |                                | N                                                 |
| CC3493      | Ribonucleoside-diphosphate reductase alpha chain                     |      | Y                        | Y                             | N                                                 |                                | N                                                 |                                | N                                                 |
| CC3494      | Hypothetical protein                                                 |      | N                        | N                             | N                                                 |                                | N                                                 |                                | N                                                 |
| CC3495      | Methyltransferase                                                    |      | Y                        | Y                             | N                                                 |                                | N                                                 |                                | N                                                 |
| CC3496      | Glutathione-regulated potassium-efflux system protein kefC           |      | Y                        | Y                             | N                                                 |                                | N                                                 |                                | N                                                 |
| CC3497      | Hypothetical transcriptional regulatory protein                      |      | Y                        | Y                             | N                                                 |                                | N                                                 |                                | N                                                 |
| CC3498      | 3-hydroxybutyryl-CoA dehydratase                                     |      | Y                        | Y                             | N                                                 |                                | N                                                 |                                | N                                                 |
| CC3499      | Hypothetical protein                                                 |      | Y                        | Y                             | N                                                 |                                | N                                                 |                                | N                                                 |
| CC3500      | Sensory transduction protein kinase                                  |      | Y                        | N                             | N                                                 |                                | N                                                 |                                | N                                                 |
| CC3501      | Sulfite reductase [NADPH] flavoprotein alpha-component               |      | Y                        | Y                             | N                                                 |                                | N                                                 |                                | N                                                 |
| CC3502      | Hypothetical exported protein                                        |      | Y                        | Y                             | N                                                 |                                | N                                                 |                                | N                                                 |
| CC3503      | SCO1/SenC family protein                                             |      | N                        | N                             | N                                                 |                                | N                                                 |                                | N                                                 |
| CC3504      | Zinc metalloprotease                                                 |      | Y                        | Y                             | N                                                 |                                | N                                                 |                                | N                                                 |
| CC3505      | Conserved hypothetical protein                                       |      | Y                        | Y                             | N                                                 |                                | N                                                 |                                | N                                                 |
| CC3506      | Transcriptional regulator, AraC family                               |      | N                        | N                             | N                                                 |                                | N                                                 |                                | N                                                 |
| CC3507      | Beta-lactamase repressor                                             |      | Y                        | Y                             | N                                                 |                                | N                                                 |                                | N                                                 |
| CC3508      | Transcriptional regulator                                            |      | N                        | N                             | N                                                 |                                | N                                                 |                                | N                                                 |
| CC3509      | Sodium bicarbonate cotransporter                                     |      | Y                        | Y                             | N                                                 |                                | N                                                 |                                | N                                                 |
| CC3510      | Transcriptional regulators, LysR family                              |      | Y                        | Y                             | N                                                 |                                | N                                                 |                                | N                                                 |
| CC3511      | ATP phosphoribosyltransferase                                        |      | N                        | N                             | N                                                 |                                | N                                                 |                                | N                                                 |
| CC3512      | Probable ATP phosphoribosyltransferase regulatory subunit            |      | N                        | N                             | N                                                 |                                | N                                                 |                                | N                                                 |
| CC3513      | Histidyl-tRNA synthetase                                             |      | Y                        | Y                             | N                                                 |                                | N                                                 |                                | N                                                 |

| Gene Number | Annotation                                                      | Gene | Entry Vector Constructed | Entry Vector Sequence Correct | Localized and Sequence-verified C-terminal Fusion | Localization w/ C-terminal Tag | Localized and Sequence-verified N-terminal Fusion | Localization w/ N-terminal Tag | Protein Localized as Both N- or C-terminal Fusion |
|-------------|-----------------------------------------------------------------|------|--------------------------|-------------------------------|---------------------------------------------------|--------------------------------|---------------------------------------------------|--------------------------------|---------------------------------------------------|
| CC3514      | Hypothetical protein                                            |      | Y                        | Y                             | N                                                 |                                | N                                                 |                                | N                                                 |
| CC3515      | Hypothetical protein                                            |      | Y                        | Y                             | N                                                 |                                | N                                                 |                                | N                                                 |
| CC3516      | Hypothetical protein                                            |      | Y                        | N                             | N                                                 |                                | N                                                 |                                | N                                                 |
| CC3517      | Hypothetical protein                                            |      | N                        | N                             | N                                                 |                                | N                                                 |                                | N                                                 |
| CC3518      | Hypothetical cytosolic protein                                  |      | Y                        | Y                             | N                                                 |                                | N                                                 |                                | N                                                 |
| CC3519      | Hypothetical membrane spanning protein                          |      | Y                        | Y                             | N                                                 |                                | N                                                 |                                | N                                                 |
| CC3520      | Hypothetical protein                                            |      | Y                        | N                             | N                                                 |                                | N                                                 |                                | N                                                 |
| CC3521      | Biotin synthase                                                 |      | Y                        | N                             | N                                                 |                                | N                                                 |                                | N                                                 |
| CC3522      | Putative adenylate cyclase family                               |      | N                        | N                             | N                                                 |                                | N                                                 |                                | N                                                 |
| CC3523      |                                                                 |      | N                        | N                             | N                                                 |                                | N                                                 |                                | N                                                 |
| CC3524      | Ferredoxin, 2Fe-2s                                              |      | Y                        | Y                             | N                                                 |                                | N                                                 |                                | N                                                 |
| CC3525      | Ferredoxin--NAD(+) reductase                                    |      | N                        | N                             | N                                                 |                                | N                                                 |                                | N                                                 |
| CC3526      | Succinate dehydrogenase iron-sulfur protein                     |      | Y                        | Y                             | N                                                 |                                | N                                                 |                                | N                                                 |
| CC3527      | Succinate dehydrogenase flavoprotein subunit                    |      | Y                        | Y                             | N                                                 |                                | N                                                 |                                | N                                                 |
| CC3528      | Succinate dehydrogenase membrane anchor subunit                 |      | Y                        | Y                             | N                                                 |                                | N                                                 |                                | N                                                 |
| CC3529      | Succinate dehydrogenase cytochrome B-556 subunit                | sdhC | Y                        | Y                             | N                                                 |                                | N                                                 |                                | N                                                 |
| CC3530      | Phosphohydrolase (MutT/nudix family protein)                    |      | Y                        | Y                             | N                                                 |                                | N                                                 |                                | N                                                 |
| CC3531      | ATPase                                                          |      | Y                        | Y                             | N                                                 |                                | N                                                 |                                | N                                                 |
| CC3532      |                                                                 |      | Y                        | Y                             | N                                                 |                                | N                                                 |                                | N                                                 |
| CC3533      | Probable sulfolipid biosynthesis protein sqdA                   |      | Y                        | Y                             | N                                                 |                                | N                                                 |                                | N                                                 |
| CC3534      | ATP/GTP hydrolase                                               |      | Y                        | Y                             | N                                                 |                                | N                                                 |                                | N                                                 |
| CC3535      | Ser/Thr kinase-related phosphotransferase                       |      | Y                        | Y                             | N                                                 |                                | N                                                 |                                | N                                                 |
| CC3536      | Mannose-1-phosphate guanyltransferase                           |      | Y                        | N                             | N                                                 |                                | N                                                 |                                | N                                                 |
| CC3537      | ATP-dependent nuclease subunit B                                |      | N                        | N                             | N                                                 |                                | N                                                 |                                | N                                                 |
| CC3538      | ATP-dependent nuclease subunit A                                |      | N                        | N                             | N                                                 |                                | N                                                 |                                | N                                                 |
| CC3539      | Thioredoxin                                                     |      | N                        | N                             | N                                                 |                                | N                                                 |                                | N                                                 |
| CC3540      | Hypothetical protein                                            |      | Y                        | Y                             | N                                                 |                                | N                                                 |                                | N                                                 |
| CC3541      | Folypolyglutamate synthase / Dihydrofolate synthase             |      | N                        | N                             | N                                                 |                                | N                                                 |                                | N                                                 |
| CC3542      | Acetyl-coenzyme A carboxylase carboxyl transferase subunit beta |      | Y                        | Y                             | Y                                                 | Patchy/Spotty                  | Y                                                 | Patchy/Spotty                  | Y                                                 |
| CC3543      | Tryptophan synthase alpha chain                                 |      | Y                        | Y                             | N                                                 |                                | N                                                 |                                | N                                                 |
| CC3544      | Tryptophan synthase beta chain                                  |      | Y                        | Y                             | N                                                 |                                | N                                                 |                                | N                                                 |
| CC3545      | N-(5'-phosphoribosyl)anthranilate isomerase                     |      | Y                        | Y                             | N                                                 |                                | N                                                 |                                | N                                                 |
| CC3546      | Usg protein                                                     |      | Y                        | Y                             | N                                                 |                                | N                                                 |                                | N                                                 |
| CC3547      | Hypothetical protein                                            |      | Y                        | Y                             | N                                                 |                                | N                                                 |                                | N                                                 |
| CC3548      | Hypothetical protein                                            |      | Y                        | Y                             | N                                                 |                                | N                                                 |                                | N                                                 |
| CC3549      | NADP-dependent malic enzyme                                     |      | Y                        | Y                             | N                                                 |                                | N                                                 |                                | N                                                 |
| CC3550      | Dihydrodipicolinate reductase                                   |      | Y                        | Y                             | N                                                 |                                | N                                                 |                                | N                                                 |
| CC3551      | Conserved hypothetical protein                                  |      | N                        | N                             | N                                                 |                                | N                                                 |                                | N                                                 |
| CC3552      | Hypothetical cytosolic protein                                  |      | Y                        | Y                             | N                                                 |                                | N                                                 |                                | N                                                 |
| CC3553      | Conserved hypothetical protein                                  |      | Y                        | Y                             | N                                                 |                                | N                                                 |                                | N                                                 |
| CC3554      | Cell cycle regulated sRNA                                       |      | Y                        | Y                             | N                                                 |                                | N                                                 |                                | N                                                 |
| CC3555      | Outer membrane protein                                          |      | Y                        | Y                             | N                                                 |                                | N                                                 |                                | N                                                 |
| CC3556      | Predicted phosphohydrolases, lcc family                         |      | N                        | N                             | N                                                 |                                | N                                                 |                                | N                                                 |
| CC3557      | Superoxide dismutase                                            |      | Y                        | Y                             | N                                                 |                                | N                                                 |                                | N                                                 |
| CC3558      | Hypothetical protein                                            |      | Y                        | Y                             | Y                                                 | Patchy/Spotty                  | Y                                                 | Patchy/Spotty                  | Y                                                 |
| CC3559      | Hypothetical protein                                            |      | Y                        | Y                             | Y                                                 | Patchy/Spotty                  | Y                                                 | Patchy/Spotty                  | Y                                                 |
| CC3560      | PAS-family sensor histidine kinase                              |      | Y                        | Y                             | N                                                 |                                | N                                                 |                                | N                                                 |

| Gene Number | Annotation                                                         | Gene | Entry Vector Constructed | Entry Vector Sequence Correct | Localized and Sequence-verified C-terminal Fusion | Localization w/ C-terminal Tag | Localized and Sequence-verified N-terminal Fusion | Localization w/ N-terminal Tag | Protein Localized as Both N- or C-terminal Fusion |
|-------------|--------------------------------------------------------------------|------|--------------------------|-------------------------------|---------------------------------------------------|--------------------------------|---------------------------------------------------|--------------------------------|---------------------------------------------------|
| CC3561      | GNAT acetyltransferase protein                                     |      | Y                        | Y                             | N                                                 |                                | N                                                 |                                | N                                                 |
| CC3562      | CoA-transferase family III protein                                 |      | Y                        | Y                             | N                                                 |                                | N                                                 |                                | N                                                 |
| CC3563      | Hypothetical protein                                               |      | Y                        | N                             | N                                                 |                                | N                                                 |                                | N                                                 |
| CC3564      | Paal thioesterase family protein                                   |      | Y                        | Y                             | N                                                 |                                | N                                                 |                                | N                                                 |
| CC3565      | Aminopeptidase N                                                   |      | N                        | N                             | N                                                 |                                | N                                                 |                                | N                                                 |
| CC3566      | ABC transporter ATP-binding protein                                |      | Y                        | Y                             | N                                                 |                                | N                                                 |                                | N                                                 |
| CC3567      | Fumarylpyruvate hydrolase                                          |      | Y                        | Y                             | N                                                 |                                | N                                                 |                                | N                                                 |
| CC3568      | Maleylpyruvate isomerase                                           |      | Y                        | Y                             | N                                                 |                                | N                                                 |                                | N                                                 |
| CC3569      | Carbonic anhydrase                                                 |      | Y                        | Y                             | N                                                 |                                | N                                                 |                                | N                                                 |
| CC3570      | Multimodular transpeptidase-transglycosylase                       |      | Y                        | Y                             | N                                                 |                                | N                                                 |                                | N                                                 |
| CC3571      | Alpha2 macroglobulin domain-containing extracellular protein       |      | N                        | N                             | N                                                 |                                | N                                                 |                                | N                                                 |
| CC3572      | Carbonic anhydrase                                                 |      | Y                        | Y                             | N                                                 |                                | N                                                 |                                | N                                                 |
| CC3573      | Transcriptional regulator, AsnC family                             |      | Y                        | Y                             | N                                                 |                                | N                                                 |                                | N                                                 |
| CC3574      | Alanine dehydrogenase                                              |      | N                        | N                             | N                                                 |                                | N                                                 |                                | N                                                 |
| CC3575      | Spore coat polysaccharide biosynthesis protein spsF                |      | Y                        | Y                             | N                                                 |                                | N                                                 |                                | N                                                 |
| CC3576      | lolS protein                                                       |      | Y                        | N                             | N                                                 |                                | N                                                 |                                | N                                                 |
| CC3577      | Xanthine and CO dehydrogenases maturation factor, XdhC/CoxF family |      | N                        | N                             | N                                                 |                                | N                                                 |                                | N                                                 |
| CC3578      | Creatinine amidohydrolase family protein                           |      | Y                        | Y                             | N                                                 |                                | N                                                 |                                | N                                                 |
| CC3579      | Transcriptional regulator                                          |      | N                        | N                             | N                                                 |                                | N                                                 |                                | N                                                 |
| CC3580      | Aldehyde dehydrogenase                                             |      | Y                        | Y                             | N                                                 |                                | N                                                 |                                | N                                                 |
| CC3581      | Acetyl-coenzyme A synthetase                                       |      | Y                        | Y                             | N                                                 |                                | N                                                 |                                | N                                                 |
| CC3582      | Hypothetical cyclase/dehydrase                                     |      | Y                        | Y                             | N                                                 |                                | N                                                 |                                | N                                                 |
| CC3583      | Hypothetical protein                                               |      | Y                        | Y                             | N                                                 |                                | N                                                 |                                | N                                                 |
| CC3584      | Peptidase, M16 family                                              |      | N                        | N                             | N                                                 |                                | N                                                 |                                | N                                                 |
| CC3585      | Large-conductance mechanosensitive channel                         |      | Y                        | Y                             | Y                                                 | Patchy/Spotty                  | Y                                                 | Patchy/Spotty                  | Y                                                 |
| CC3586      | Integration host factor beta-subunit                               |      | Y                        | Y                             | N                                                 |                                | N                                                 |                                | N                                                 |
| CC3587      | SSU ribosomal protein S1P                                          |      | Y                        | Y                             | N                                                 |                                | N                                                 |                                | N                                                 |
| CC3588      | Cytidylate kinase                                                  |      | N                        | N                             | N                                                 |                                | N                                                 |                                | N                                                 |
| CC3589      | 3-phosphoshikimate 1-carboxyvinyltransferase                       |      | N                        | N                             | N                                                 |                                | N                                                 |                                | N                                                 |
| CC3590      | Hypothetical protein                                               |      | Y                        | Y                             | N                                                 |                                | N                                                 |                                | N                                                 |
| CC3591      | tRNA-Ala-GGC                                                       |      | Y                        | Y                             | N                                                 |                                | N                                                 |                                | N                                                 |
| CC3592      | Small heat shock protein                                           |      | Y                        | Y                             | Y                                                 | Varied Focus                   | Y                                                 | Varied Focus                   | Y                                                 |
| CC3593      | Conserved hypothetical protein                                     |      | N                        | N                             | N                                                 |                                | N                                                 |                                | N                                                 |
| CC3594      | Transposase                                                        |      | Y                        | N                             | N                                                 |                                | N                                                 |                                | N                                                 |
| CC3595      | Transposase                                                        |      | Y                        | N                             | N                                                 |                                | N                                                 |                                | N                                                 |
| CC3596      | Nitrogen regulatory IIA protein                                    |      | Y                        | N                             | N                                                 |                                | N                                                 |                                | N                                                 |
| CC3597      | Ribosome-associated factor Y                                       |      | Y                        | Y                             | N                                                 |                                | N                                                 |                                | N                                                 |
| CC3598      | Hypothetical protein                                               |      | Y                        | Y                             | N                                                 |                                | N                                                 |                                | N                                                 |
| CC3599      | RNA polymerase sigma-54 factor rpoN                                |      | Y                        | Y                             | N                                                 |                                | N                                                 |                                | N                                                 |
| CC3600      | ABC transporter ATP-binding protein                                |      | Y                        | Y                             | N                                                 |                                | N                                                 |                                | N                                                 |
| CC3601      | Protein yhbN precursor                                             |      | Y                        | N                             | N                                                 |                                | N                                                 |                                | N                                                 |
| CC3602      | Conserved hypothetical protein                                     |      | Y                        | Y                             | N                                                 |                                | N                                                 |                                | N                                                 |
| CC3603      | Ribonuclease D                                                     |      | Y                        | Y                             | N                                                 |                                | N                                                 |                                | N                                                 |
| CC3604      | NADH-ubiquinone oxidoreductase subunit                             |      | N                        | N                             | N                                                 |                                | N                                                 |                                | N                                                 |
| CC3605      | Undecaprenyl-diphosphatase (Bacitracin resistance protein)         |      | Y                        | Y                             | Y                                                 | Patchy/Spotty                  | N                                                 |                                | N                                                 |
| CC3606      | Glutamate synthase [NADPH] small chain                             |      | N                        | N                             | N                                                 |                                | N                                                 |                                | N                                                 |

| Gene Number | Annotation                                                                                                  | Gene | Entry Vector Constructed | Entry Vector Sequence Correct | Localized and Sequence-verified C-terminal Fusion | Localization w/ C-terminal Tag | Localized and Sequence-verified N-terminal Fusion | Localization w/ N-terminal Tag | Protein Localized as Both N- or C-terminal Fusion |
|-------------|-------------------------------------------------------------------------------------------------------------|------|--------------------------|-------------------------------|---------------------------------------------------|--------------------------------|---------------------------------------------------|--------------------------------|---------------------------------------------------|
| CC3607      | Glutamate synthase [NADPH] large chain                                                                      |      | N                        | N                             | N                                                 |                                | N                                                 |                                | N                                                 |
| CC3608      |                                                                                                             |      | Y                        | Y                             | N                                                 |                                | N                                                 |                                | N                                                 |
| CC3609      | Hypothetical membrane associated protein                                                                    |      | N                        | N                             | N                                                 |                                | N                                                 |                                | N                                                 |
| CC3610      | ATP-dependent DNA ligase                                                                                    |      | N                        | N                             | N                                                 |                                | N                                                 |                                | N                                                 |
| CC3611      | Transcriptional regulator                                                                                   |      | Y                        | Y                             | N                                                 |                                | N                                                 |                                | N                                                 |
| CC3612      | Small-conductance mechanosensitive channel mcsS                                                             | mcsS | Y                        | Y                             | N                                                 |                                | N                                                 |                                | N                                                 |
| CC3613      | Hypothetical protein                                                                                        |      | Y                        | Y                             | N                                                 |                                | N                                                 |                                | N                                                 |
| CC3614      | Transaldolase-like protein                                                                                  |      | Y                        | Y                             | N                                                 |                                | N                                                 |                                | N                                                 |
| CC3615      | dTDP-4-dehydrorhamnose reductase                                                                            |      | Y                        | N                             | N                                                 |                                | N                                                 |                                | N                                                 |
| CC3616      | Histidinol-phosphatase                                                                                      |      | Y                        | N                             | N                                                 |                                | N                                                 |                                | N                                                 |
| CC3617      | Mannose-6-phosphate isomerase                                                                               |      | Y                        | Y                             | N                                                 |                                | N                                                 |                                | N                                                 |
| CC3618      | Mannose-1-phosphate guanylyltransferase (GDP)                                                               |      | Y                        | Y                             | N                                                 |                                | N                                                 |                                | N                                                 |
| CC3619      | Glutamine-dependent NAD(+) synthetase                                                                       |      | Y                        | Y                             | Y                                                 | Pole                           | N                                                 |                                | N                                                 |
| CC3620      | Transketolase                                                                                               |      | Y                        | Y                             | N                                                 |                                | N                                                 |                                | N                                                 |
| CC3621      | Hypothetical YGGT family protein                                                                            |      | Y                        | Y                             | N                                                 |                                | N                                                 |                                | N                                                 |
| CC3622      | YggU superfamily protein                                                                                    |      | N                        | N                             | N                                                 |                                | N                                                 |                                | N                                                 |
| CC3623      | hybrid histidine kinase/receiver domain protein                                                             |      | Y                        | Y                             | N                                                 |                                | N                                                 |                                | N                                                 |
| CC3624      | Very short patch repair endonuclease                                                                        |      | Y                        | Y                             | N                                                 |                                | Y                                                 | Patchy/Spotty                  | N                                                 |
| CC3625      | Cysteine synthase                                                                                           |      | Y                        | Y                             | N                                                 |                                | N                                                 |                                | N                                                 |
| CC3626      | DNA-cytosine methyltransferase                                                                              |      | Y                        | Y                             | N                                                 |                                | N                                                 |                                | N                                                 |
| CC3627      | Hypothetical membrane protein                                                                               |      | N                        | N                             | N                                                 |                                | N                                                 |                                | N                                                 |
| CC3628      | Beta-lactamase family protein                                                                               |      | Y                        | Y                             | N                                                 |                                | N                                                 |                                | N                                                 |
| CC3629      | dTDP-glucose 4,6-dehydratase                                                                                |      | Y                        | Y                             | N                                                 |                                | N                                                 |                                | N                                                 |
| CC3630      | Formyltetrahydrofolate deformylase                                                                          |      | Y                        | Y                             | N                                                 |                                | N                                                 |                                | N                                                 |
| CC3631      | Acetylornithine deacetylase                                                                                 |      | Y                        | Y                             | N                                                 |                                | N                                                 |                                | N                                                 |
| CC3632      | Glycosyltransferase                                                                                         |      | Y                        | Y                             | N                                                 |                                | N                                                 |                                | N                                                 |
| CC3633      | dTDP-4-dehydrorhamnose 3,5-epimerase                                                                        |      | N                        | N                             | N                                                 |                                | N                                                 |                                | N                                                 |
| CC3634      | 2-hydroxy-6-oxo-6-phenylhexa-2,4-dienoate hydrolase                                                         |      | Y                        | Y                             | N                                                 |                                | N                                                 |                                | N                                                 |
| CC3635      | Threonine dehydratase                                                                                       |      | N                        | N                             | N                                                 |                                | N                                                 |                                | N                                                 |
| CC3636      | Peptidyl-prolyl cis-trans isomerase                                                                         |      | Y                        | Y                             | N                                                 |                                | N                                                 |                                | N                                                 |
| CC3637      | UTP--glucose-1-phosphate uridylyltransferase                                                                |      | Y                        | Y                             | N                                                 |                                | N                                                 |                                | N                                                 |
| CC3638      | iron-sulfur cluster-binding protein                                                                         |      | N                        | N                             | N                                                 |                                | N                                                 |                                | N                                                 |
| CC3639      | Glutathione S-transferase family protein                                                                    |      | Y                        | Y                             | Y                                                 | MidBand                        | Y                                                 | MidBand                        | Y                                                 |
| CC3640      | D-glycero-D-manno-heptose-7-phosphate 1-kinase / D-glycero-D-manno-heptose-1-phosphate adenyllyltransferase |      | Y                        | Y                             | N                                                 |                                | N                                                 |                                | N                                                 |
| CC3641      | Cobalt-zinc-cadmium resistance protein czcD                                                                 |      | Y                        | Y                             | N                                                 |                                | N                                                 |                                | N                                                 |
| CC3642      | Citrate synthase                                                                                            |      | Y                        | Y                             | N                                                 |                                | N                                                 |                                | N                                                 |
| CC3643      | Citrate synthase                                                                                            |      | N                        | N                             | N                                                 |                                | N                                                 |                                | N                                                 |
| CC3644      | mRNA 3'-end processing factor                                                                               |      | Y                        | Y                             | N                                                 |                                | N                                                 |                                | N                                                 |
| CC3645      | Hypothetical cytosolic protein                                                                              |      | Y                        | Y                             | N                                                 |                                | N                                                 |                                | N                                                 |
| CC3646      | Hypothetical cytosolic protein                                                                              |      | Y                        | Y                             | N                                                 |                                | N                                                 |                                | N                                                 |
| CC3647      | Hypothetical protein                                                                                        |      | Y                        | Y                             | N                                                 |                                | N                                                 |                                | N                                                 |
| CC3648      | Deacetylase                                                                                                 |      | Y                        | N                             | N                                                 |                                | N                                                 |                                | N                                                 |
| CC3649      | Acyl-CoA thioesterase                                                                                       |      | Y                        | Y                             | N                                                 |                                | N                                                 |                                | N                                                 |
| CC3650      | Phosphohydrolase (MutT/nudix family protein)                                                                |      | Y                        | Y                             | N                                                 |                                | N                                                 |                                | N                                                 |
| CC3651      | 16S rRNA processing protein rimM                                                                            |      | Y                        | Y                             | N                                                 |                                | N                                                 |                                | N                                                 |

| Gene Number | Annotation                                                                | Gene | Entry Vector Constructed | Entry Vector Sequence Correct | Localized and Sequence-verified C-terminal Fusion | Localization w/ C-terminal Tag | Localized and Sequence-verified N-terminal Fusion | Localization w/ N-terminal Tag | Protein Localized as Both N- or C-terminal Fusion |
|-------------|---------------------------------------------------------------------------|------|--------------------------|-------------------------------|---------------------------------------------------|--------------------------------|---------------------------------------------------|--------------------------------|---------------------------------------------------|
| CC3652      | SSU ribosomal protein S16P                                                |      | Y                        | Y                             | N                                                 |                                | N                                                 |                                | N                                                 |
| CC3653      | Signal recognition particle GTPase, SRP                                   | Srp  | Y                        | Y                             | N                                                 |                                | N                                                 |                                | N                                                 |
| CC3654      | Hypothetical protein                                                      |      | Y                        | Y                             | Y                                                 | Bipolar and Unipolar           | N                                                 |                                | N                                                 |
| CC3655      | Malate dehydrogenase                                                      |      | N                        | N                             | N                                                 |                                | N                                                 |                                | N                                                 |
| CC3656      | dehydrogenase with MaoC-like domain / dehydrogenase with MaoC-like domain |      | Y                        | Y                             | N                                                 |                                | N                                                 |                                | N                                                 |
| CC3657      | HIT1 protein                                                              |      | Y                        | Y                             | N                                                 |                                | N                                                 |                                | N                                                 |
| CC3658      | Conserved hypothetical protein                                            |      | Y                        | N                             | N                                                 |                                | N                                                 |                                | N                                                 |
| CC3659      | Citrate lyase beta chain / Citryl-CoA lyase subunit                       |      | Y                        | N                             | N                                                 |                                | N                                                 |                                | N                                                 |
| CC3660      | Conserved hypothetical protein                                            |      | Y                        | Y                             | N                                                 |                                | N                                                 |                                | N                                                 |
| CC3661      | 2'-5' RNA ligase                                                          |      | Y                        | Y                             | N                                                 |                                | N                                                 |                                | N                                                 |
| CC3662      | Tas protein                                                               |      | Y                        | Y                             | N                                                 |                                | N                                                 |                                | N                                                 |
| CC3663      | Integral membrane protein                                                 |      | Y                        | Y                             | N                                                 |                                | N                                                 |                                | N                                                 |
| CC3664      | Hypothetical cytosolic protein                                            |      | N                        | N                             | N                                                 |                                | N                                                 |                                | N                                                 |
| CC3665      |                                                                           |      | Y                        | Y                             | N                                                 |                                | N                                                 |                                | N                                                 |
| CC3666      | Hypothetical exported protein                                             |      | Y                        | Y                             | N                                                 |                                | N                                                 |                                | N                                                 |
| CC3667      | Aconitate hydratase                                                       |      | N                        | N                             | N                                                 |                                | N                                                 |                                | N                                                 |
| CC3668      | Heme exporter protein A                                                   |      | Y                        | Y                             | N                                                 |                                | N                                                 |                                | N                                                 |
| CC3669      | Heme exporter protein B                                                   |      | N                        | N                             | N                                                 |                                | N                                                 |                                | N                                                 |
| CC3670      | Transporter                                                               |      | N                        | N                             | N                                                 |                                | N                                                 |                                | N                                                 |
| CC3671      | Hypothetical protein                                                      |      | Y                        | Y                             | N                                                 |                                | N                                                 |                                | N                                                 |
| CC3672      | Heme chaperone heme-lyase                                                 |      | Y                        | Y                             | N                                                 |                                | N                                                 |                                | N                                                 |
| CC3673      | Hypothetical heme exporter protein CcmD                                   |      | Y                        | Y                             | Y                                                 | Central - Focus                | N                                                 |                                | N                                                 |
| CC3674      | Thiol:disulfide interchange protein tlpA                                  |      | N                        | N                             | N                                                 |                                | N                                                 |                                | N                                                 |
| CC3675      | Hypothetical protein                                                      |      | Y                        | Y                             | N                                                 |                                | N                                                 |                                | N                                                 |
| CC3676      | Hypothetical protein                                                      |      | Y                        | Y                             | N                                                 |                                | N                                                 |                                | N                                                 |
| CC3677      | Transcriptional regulator, MarR family                                    |      | Y                        | N                             | N                                                 |                                | N                                                 |                                | N                                                 |
| CC3678      | Intracellular septation protein                                           |      | Y                        | Y                             | N                                                 |                                | N                                                 |                                | N                                                 |
| CC3679      | Cell division protein ftsY                                                |      | N                        | N                             | N                                                 |                                | N                                                 |                                | N                                                 |
| CC3680      | Hypothetical membrane spanning protein                                    |      | Y                        | Y                             | N                                                 |                                | N                                                 |                                | N                                                 |
| CC3681      | Tellurium resistance protein terB                                         |      | Y                        | Y                             | N                                                 |                                | N                                                 |                                | N                                                 |
| CC3682      | Tellurium resistance protein terC                                         |      | Y                        | Y                             | N                                                 |                                | N                                                 |                                | N                                                 |
| CC3683      | Hypothetical protein                                                      |      | Y                        | Y                             | N                                                 |                                | N                                                 |                                | N                                                 |
| CC3684      | tRNA 2-methylthioadenosine synthase homolog                               |      | Y                        | Y                             | N                                                 |                                | N                                                 |                                | N                                                 |
| CC3685      | Short chain dehydrogenase                                                 |      | Y                        | Y                             | N                                                 |                                | N                                                 |                                | N                                                 |
| CC3686      | Diaminopimelate epimerase                                                 |      | Y                        | Y                             | N                                                 |                                | N                                                 |                                | N                                                 |
| CC3687      | Prolyl endopeptidase family                                               |      | Y                        | Y                             | N                                                 |                                | N                                                 |                                | N                                                 |
| CC3688      | Hypothetical prolyl oligopeptidase family protein                         |      | Y                        | Y                             | N                                                 |                                | N                                                 |                                | N                                                 |
| CC3689      | Hypothetical cellulose biosynthesis protein                               |      | Y                        | Y                             | N                                                 |                                | N                                                 |                                | N                                                 |
| CC3690      | CelD                                                                      |      | Y                        | Y                             | N                                                 |                                | N                                                 |                                | N                                                 |
| CC3691      | Hypothetical cytosolic protein                                            |      | Y                        | Y                             | N                                                 |                                | N                                                 |                                | N                                                 |
| CC3692      | Transcriptional regulator                                                 |      | Y                        | Y                             | N                                                 |                                | N                                                 |                                | N                                                 |
| CC3693      | Outer membrane lipoprotein                                                |      | Y                        | Y                             | N                                                 |                                | N                                                 |                                | N                                                 |
| CC3694      | Organic solvent resistance transport system Ttg2D protein                 |      | Y                        | Y                             | N                                                 |                                | N                                                 |                                | N                                                 |
| CC3695      | Organic solvent resistance transport system Ttg2C protein                 |      | Y                        | Y                             | N                                                 |                                | N                                                 |                                | N                                                 |
| CC3696      | Organic solvent resistance transport system permease                      |      | Y                        | Y                             | N                                                 |                                | N                                                 |                                | N                                                 |

| Gene Number | Annotation                                                                                    | Gene | Entry Vector Constructed | Entry Vector Sequence Correct | Localized and Sequence-verified C-terminal Fusion | Localization w/ C-terminal Tag | Localized and Sequence-verified N-terminal Fusion | Localization w/ N-terminal Tag | Protein Localized as Both N- or C-terminal Fusion |
|-------------|-----------------------------------------------------------------------------------------------|------|--------------------------|-------------------------------|---------------------------------------------------|--------------------------------|---------------------------------------------------|--------------------------------|---------------------------------------------------|
| CC3696      | Organic solvent resistance transport system ATP-binding protein                               |      | Y                        | Y                             | N                                                 |                                | N                                                 |                                | N                                                 |
| CC3697      | Transcriptional regulator, LysR family                                                        |      | Y                        | Y                             | N                                                 |                                | N                                                 |                                | N                                                 |
| CC3698      | Peroxiredoxin reductase AhpD (NAD(P)H) intermediate filament-like cell shape determinant creS | creS | Y                        | Y                             | Y                                                 | Line                           | Y                                                 | Line                           | Y                                                 |
| CC3700      | Conserved hypothetical protein                                                                |      | Y                        | Y                             | N                                                 |                                | N                                                 |                                | N                                                 |
| CC3701      | GumN superfamily protein                                                                      |      | N                        | N                             | N                                                 |                                | N                                                 |                                | N                                                 |
| CC3702      | Peptidyl-dipeptidase DCP                                                                      |      | Y                        | Y                             | N                                                 |                                | N                                                 |                                | N                                                 |
| CC3703      | Glutamate racemase                                                                            |      | Y                        | Y                             | N                                                 |                                | N                                                 |                                | N                                                 |
| CC3704      | Cell division protein ftsK                                                                    | ftsK | N                        | N                             | N                                                 |                                | N                                                 |                                | N                                                 |
| CC3705      | Outer-membrane lipoproteins carrier protein                                                   |      | Y                        | Y                             | N                                                 |                                | N                                                 |                                | N                                                 |
| CC3706      | Exodeoxyribonuclease III                                                                      |      | Y                        | N                             | N                                                 |                                | N                                                 |                                | N                                                 |
| CC3707      | Formamidopyrimidine-DNA glycosylase                                                           |      | N                        | N                             | N                                                 |                                | N                                                 |                                | N                                                 |
| CC3708      | Ubiquinone/menaquinone biosynthesis methyltransferase ubiE                                    |      | Y                        | Y                             | N                                                 |                                | N                                                 |                                | N                                                 |
| CC3709      | 2-polyprenylphenol 6-hydroxylase accessory protein ubiB                                       | ubiB | Y                        | Y                             | Y                                                 | Patchy/Spotty                  | Y                                                 | Patchy/Spotty                  | Y                                                 |
| CC3710      |                                                                                               |      | Y                        | Y                             | N                                                 |                                | N                                                 |                                | N                                                 |
| CC3711      | Hypothetical protein                                                                          |      | Y                        | Y                             | N                                                 |                                | N                                                 |                                | N                                                 |
| CC3712      | Phosphopantothienylcysteine decarboxylase / Phosphopantothenate--cysteine ligase              |      | Y                        | N                             | N                                                 |                                | N                                                 |                                | N                                                 |
| CC3713      | Deoxyuridine 5'-triphosphate nucleotidohydrolase                                              |      | Y                        | Y                             | N                                                 |                                | N                                                 |                                | N                                                 |
| CC3714      | Multidrug resistance protein A                                                                |      | N                        | N                             | N                                                 |                                | N                                                 |                                | N                                                 |
| CC3715      | Multidrug resistance protein B                                                                |      | Y                        | Y                             | N                                                 |                                | N                                                 |                                | N                                                 |
| CC3716      | Transcriptional regulator, TetR family                                                        |      | Y                        | Y                             | N                                                 |                                | N                                                 |                                | N                                                 |
| CC3717      | Enoyl-[acyl-carrier protein] reductase (NADH)                                                 |      | Y                        | Y                             | N                                                 |                                | N                                                 |                                | N                                                 |
| CC3718      | Tetratricopeptide repeat family protein                                                       |      | Y                        | Y                             | N                                                 |                                | N                                                 |                                | N                                                 |
| CC3719      | 3-oxoacyl-[acyl-carrier-protein] synthase                                                     |      | Y                        | N                             | N                                                 |                                | N                                                 |                                | N                                                 |
| CC3720      | 3-hydroxydecanoyl-[acyl-carrier-protein] dehydratase                                          |      | Y                        | Y                             | N                                                 |                                | N                                                 |                                | N                                                 |
| CC3721      | Hypothetical protein                                                                          |      | Y                        | Y                             | N                                                 |                                | N                                                 |                                | N                                                 |
| CC3722      | gluconate 2-dehydrogenase / glyoxylate reductase / hydroxypyruvate reductase                  |      | Y                        | Y                             | Y                                                 | Middle AND Pole                | N                                                 |                                | N                                                 |
| CC3723      | Acylamino-acid-releasing enzyme                                                               |      | Y                        | Y                             | N                                                 |                                | N                                                 |                                | N                                                 |
| CC3724      | Succinyl-CoA:coenzyme A transferase                                                           |      | Y                        | Y                             | N                                                 |                                | N                                                 |                                | N                                                 |
| CC3725      | Alpha/beta hydrolase fold protein                                                             |      | Y                        | Y                             | N                                                 |                                | N                                                 |                                | N                                                 |
| CC3726      | Molybdopterin biosynthesis MoeB protein                                                       |      | Y                        | N                             | N                                                 |                                | N                                                 |                                | N                                                 |
| CC3727      | ATP-dependent endopeptidase hsl proteolytic subunit hslV                                      |      | Y                        | Y                             | N                                                 |                                | N                                                 |                                | N                                                 |
| CC3728      | ATP-dependent endopeptidase hsl ATP-binding subunit hslU                                      |      | Y                        | Y                             | Y                                                 | Middle OR Pole                 | Y                                                 | Middle OR Pole                 | Y                                                 |
| CC3729      | ADA regulatory protein / O6-methylguanine-DNA methyltransferase                               |      | Y                        | Y                             | N                                                 |                                | N                                                 |                                | N                                                 |
| CC3730      | Hypothetical membrane spanning protein                                                        |      | Y                        | Y                             | N                                                 |                                | N                                                 |                                | N                                                 |
| CC3731      | Endonuclease III                                                                              |      | Y                        | Y                             | N                                                 |                                | N                                                 |                                | N                                                 |
| CC3732      | Transporter                                                                                   |      | Y                        | Y                             | N                                                 |                                | N                                                 |                                | N                                                 |
| CC3733      | Fructokinase                                                                                  |      | Y                        | Y                             | Y                                                 | Patchy/Spotty                  | N                                                 |                                | N                                                 |
| CC3734      | Imidazoleglycerol-phosphate dehydratase                                                       |      | Y                        | Y                             | N                                                 |                                | N                                                 |                                | N                                                 |
| CC3735      | Imidazole glycerol phosphate synthase, glutamine amidotransferase subunit                     |      | Y                        | Y                             | N                                                 |                                | N                                                 |                                | N                                                 |



| Gene Number                            | Annotation                                                                                        | Gene | Entry Vector Constructed | Entry Vector Sequence Correct | Localized and Sequence-verified C-terminal Fusion | Localization w/ C-terminal Tag | Localized and Sequence-verified N-terminal Fusion | Localization w/ N-terminal Tag | Protein Localized as Both N- or C-terminal Fusion |
|----------------------------------------|---------------------------------------------------------------------------------------------------|------|--------------------------|-------------------------------|---------------------------------------------------|--------------------------------|---------------------------------------------------|--------------------------------|---------------------------------------------------|
| CC3736                                 | 1-(5-phosphoribosyl)-5-[[5-phosphoribosylamino)methylideneamino]imidazole-4-carboxamide isomerase |      | Y                        | N                             | N                                                 |                                | N                                                 |                                | N                                                 |
| CC3737                                 | Imidazole glycerol phosphate synthase, cyclase subunit                                            |      | Y                        | Y                             | N                                                 |                                | N                                                 |                                | N                                                 |
| CC3738                                 | Phosphoribosyl-ATP pyrophosphatase                                                                |      | N                        | N                             | N                                                 |                                | N                                                 |                                | N                                                 |
| CC3739                                 | MuttS related protein                                                                             |      | N                        | N                             | N                                                 |                                | N                                                 |                                | N                                                 |
| CC3740                                 | Membrane-bound lytic murein transglycosylase A                                                    |      | N                        | N                             | N                                                 |                                | N                                                 |                                | N                                                 |
| CC3741                                 | Transporter                                                                                       |      | N                        | N                             | N                                                 |                                | N                                                 |                                | N                                                 |
| CC3742                                 | Protein translocase subunit secB                                                                  |      | Y                        | Y                             | N                                                 |                                | N                                                 |                                | N                                                 |
| CC3743                                 | Two-component response regulator cenR                                                             | cenR | Y                        | Y                             | N                                                 |                                | N                                                 |                                | N                                                 |
| CC3744                                 | Hypothetical cytosolic protein                                                                    |      | Y                        | Y                             | N                                                 |                                | N                                                 |                                | N                                                 |
| CC3745                                 | Pyridoxal 5'-phosphate dependent enzyme class III                                                 |      | Y                        | Y                             | N                                                 |                                | N                                                 |                                | N                                                 |
| CC3746                                 | Regulatory protein tenI                                                                           |      | Y                        | Y                             | N                                                 |                                | N                                                 |                                | N                                                 |
| CC3747                                 | Hypothetical protein                                                                              |      | Y                        | Y                             | N                                                 |                                | N                                                 |                                | N                                                 |
| CC3748                                 | Hypothetical cytosolic protein                                                                    |      | Y                        | Y                             | N                                                 |                                | N                                                 |                                | N                                                 |
| CC3749                                 | Leucyl-tRNA synthetase                                                                            |      | Y                        | Y                             | N                                                 |                                | N                                                 |                                | N                                                 |
| CC3750                                 | Hypothetical periplasmic protein                                                                  |      | Y                        | Y                             | N                                                 |                                | N                                                 |                                | N                                                 |
| CC3751                                 | DNA polymerase III, delta subunit                                                                 |      | Y                        | Y                             | N                                                 |                                | N                                                 |                                | N                                                 |
| CC3752                                 | Chromosome partitioning protein parB                                                              | parB | Y                        | Y                             | Y                                                 | Middle AND Pole                | Y                                                 | Middle AND Pole                | Y                                                 |
| CC3753                                 | Chromosome partitioning protein parA                                                              | parA | Y                        | Y                             | Y                                                 | Bipolar and Unipolar           | Y                                                 | Bipolar and Unipolar           | Y                                                 |
| CC3754                                 | Methyltransferase gidB                                                                            | gidB | Y                        | Y                             | N                                                 |                                | N                                                 |                                | N                                                 |
| CC3755                                 | Glucose inhibited division protein A                                                              | gidA | Y                        | Y                             | N                                                 |                                | N                                                 |                                | N                                                 |
| CC3756                                 | tRNA (5-carboxymethylaminomethyl-2-thiouridylate) synthase                                        | trmE | Y                        | Y                             | N                                                 |                                | N                                                 |                                | N                                                 |
| CC3757                                 | Conserved hypothetical protein                                                                    |      | Y                        | Y                             | Y                                                 | Middle OR Pole                 | Y                                                 | Middle OR Pole                 | Y                                                 |
| CC3758                                 | Carboxymethylenebutenolidase                                                                      |      | Y                        | Y                             | N                                                 |                                | N                                                 |                                | N                                                 |
| CC3759                                 | Quinone oxidoreductase                                                                            | qor  | N                        | N                             | N                                                 |                                | N                                                 |                                | N                                                 |
| CC3760                                 | Transcription termination factor rho                                                              | rho  | Y                        | Y                             | Y                                                 | Patchy/Spotty                  | Y                                                 | Patchy/Spotty                  | Y                                                 |
| CC3761                                 | Hypothetical membrane spanning protein                                                            |      | Y                        | Y                             | N                                                 |                                | N                                                 |                                | N                                                 |
| CC3762                                 | Ferrochelataase                                                                                   | hemH | Y                        | Y                             | N                                                 |                                | N                                                 |                                | N                                                 |
| CC3763                                 | Uroporphyrinogen decarboxylase                                                                    | hemE | Y                        | Y                             | N                                                 |                                | N                                                 |                                | N                                                 |
| Total                                  |                                                                                                   |      | 3184                     | 2786                          | 187                                               |                                | 165                                               |                                | 63                                                |
| Percent of Total Correct Entry Vectors |                                                                                                   |      | N/A                      | N/A                           | 6.7                                               |                                | 5.9                                               |                                | 2.3                                               |
| Percent of Total Proteins              |                                                                                                   |      | 84.6                     | 74.0                          | 5.0                                               |                                | 4.4                                               |                                | 1.7                                               |
