# Supplementary material
Source: PubMed Central journal article supplement (PMC2683086)
Supplement: 0901781106_ST2_PDF.pdf [file 0901781106_ST2_PDF.pdf]

Table S2. Control proteins that have previously been reported to localize as fluorescent protein fusions and were present in the *Caulobacter* ORFeome

| Protein | Gene no. | Reported localization | Observed localization | Reference for report |
|---------|----------|-----------------------|-----------------------|----------------------|
| HolC    | CC0267   | Middle or pole        | Diffuse               | 8                    |
| McpA    | CC0430   | Pole--swarmer         | Pole                  | 9                    |
| CpdR    | CC0744   | Pole--stalk           | Pole                  | 10                   |
| FliG    | CC0906   | Pole--swarmer         | Pole                  | 11                   |
| DivJ    | CC1063   | Pole--stalk           | Pole                  | 12                   |
| CckA    | CC1078   | Pole                  | Pole                  | 13                   |
| PopZ    | CC1319   | Bipolar and unipolar  | Bipolar and unipolar  | 14, 15               |
| MreB    | CC1543   | Patchy/spotty         | Patchy/spotty         | 16                   |
| MreC    | CC1544   | Patchy/spotty         | Patchy/spotty         | 17                   |
| Pbp2    | CC1546   | Patchy/spotty         | Patchy/spotty         | 17                   |
| ParC    | CC1566   | Central focus         | Patchy/spotty         | 18                   |
| DnaB    | CC1665   | Middle or pole        | Middle or pole        | 8                    |
| HolB    | CC1823   | Middle or pole        | Diffuse               | 8                    |
| ClpX    | CC1961   | Middle or pole        | Middle or pole        | 19                   |
| ClpP    | CC1963   | Middle or pole        | Pole                  | 19                   |
| PfII    | CC2160   | Pole--swarmer         | Patchy/spotty         | 20                   |
| MipZ    | CC2165   | Bipolar and unipolar  | Bipolar and unipolar  | 21                   |
| PleD    | CC2462   | Pole--stalk           | Diffuse               | 22                   |
| DivK    | CC2463   | Bipolar and unipolar  | Bipolar and unipolar  | 23                   |
| PleC    | CC2482   | Pole--swarmer         | Pole                  | 12                   |
| FtsZ    | CC2540   | Midband               | Midband               | 21                   |
| MurG    | CC2551   | Midband               | Midband               | 24                   |
| Pbp3    | CC2560   | Middle or pole        | Diffuse               | 25                   |
| CtrA    | CC3035   | Pole--stalk           | Pole                  | 26                   |
| RcdA    | CC3295   | Middle or pole        | Pole                  | 19                   |
| DivL    | CC3484   | Pole                  | Diffuse               | 27                   |
| CreS    | CC3699   | Line                  | Line                  | 28                   |
| ParB    | CC3752   | Middle and pole       | Middle and pole       | 21                   |
| ParA    | CC3753   | Pole--stalk           | Pole                  | 29                   |
